# Supplementary material
Source: PubMed Central journal article supplement (PMC4110347)
Supplement: NIHMS604676-supplement-07.pdf [file NIHMS604676-supplement-07.pdf]

## Inter experiments correlation (VAV2)

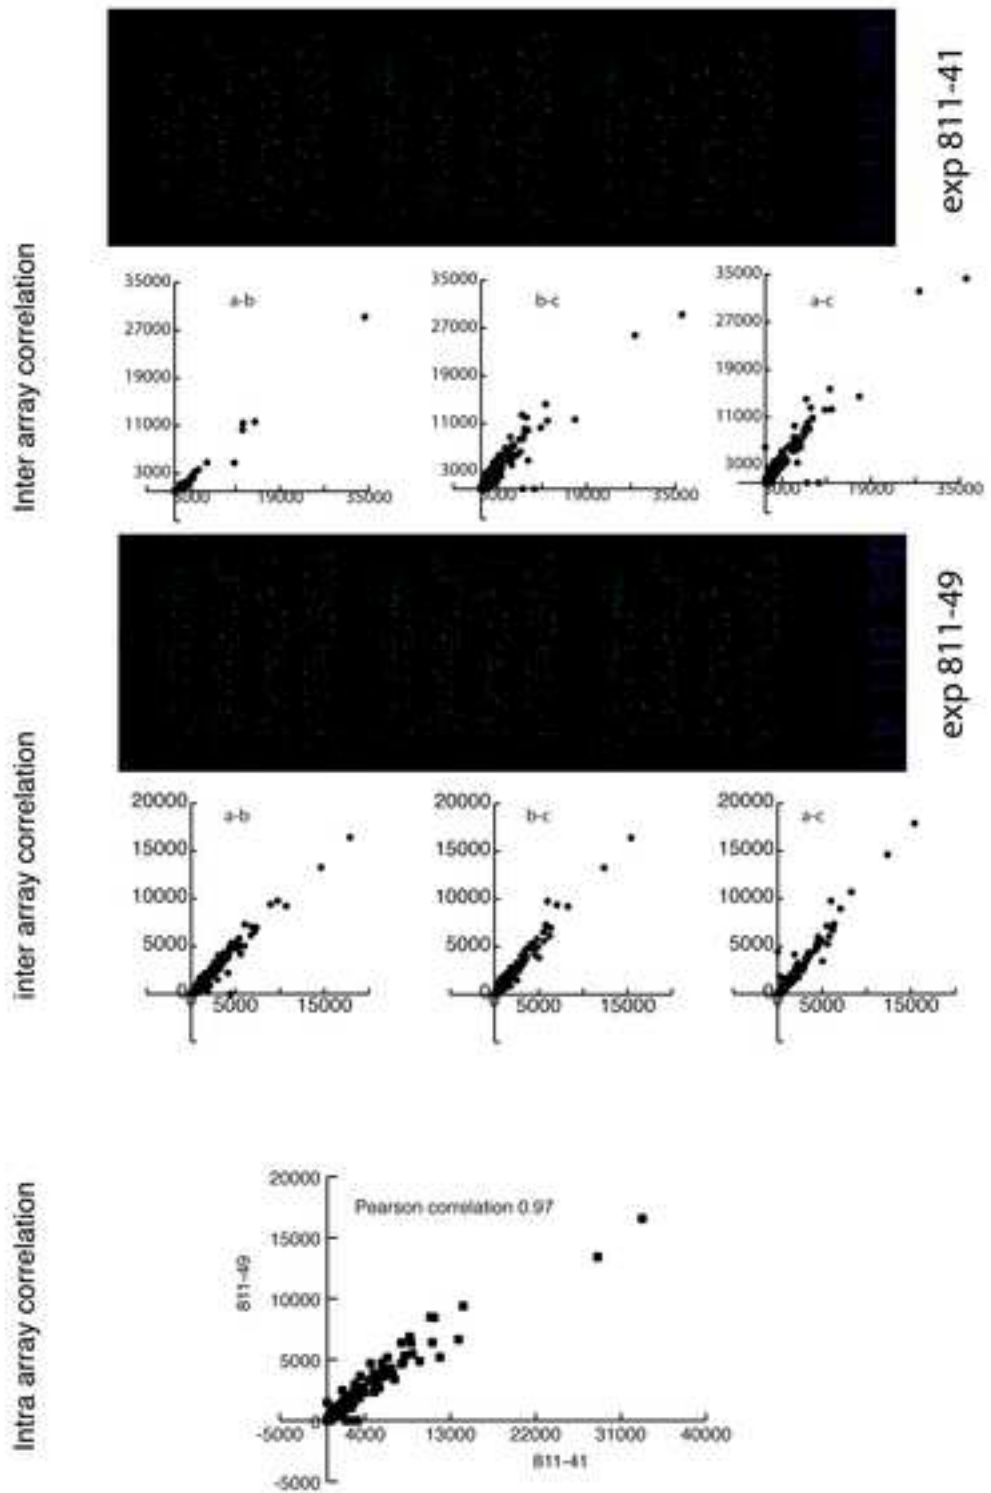

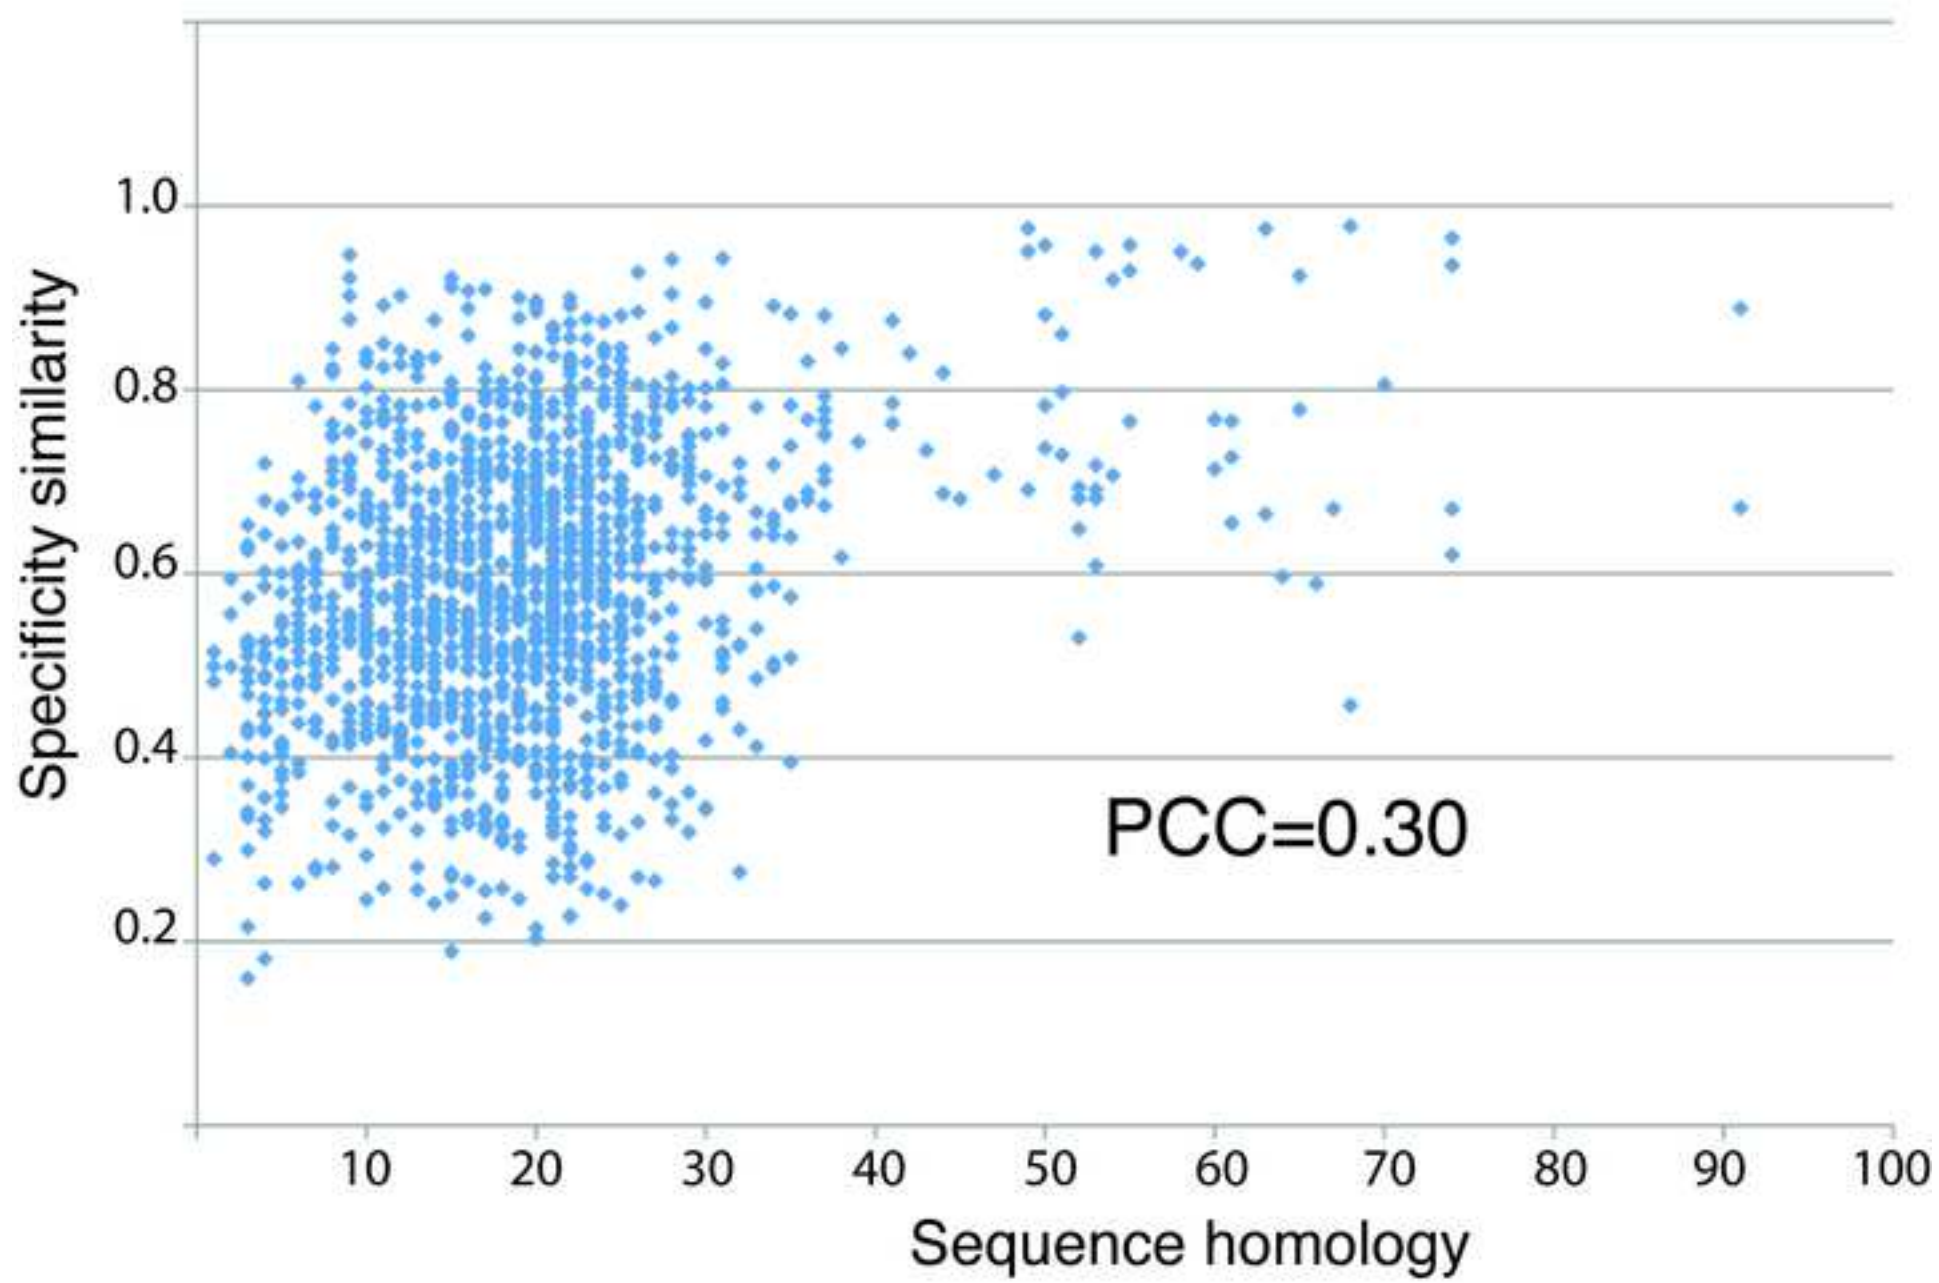



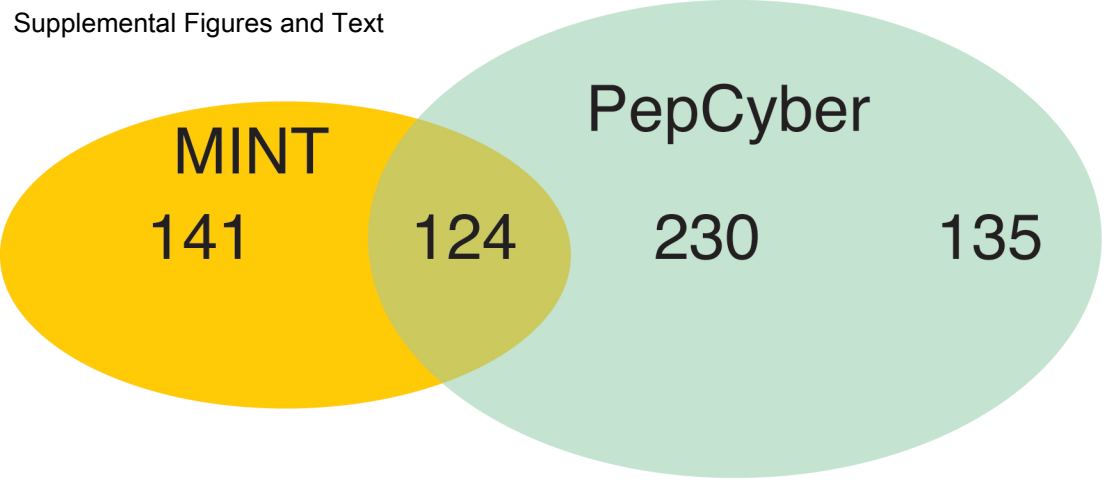

┌──────────┐ ┌──────────────────────────┐ ┌──────────┐  
Checked for Re-curated Deleted  
consistency according to PSI

### Co-expression

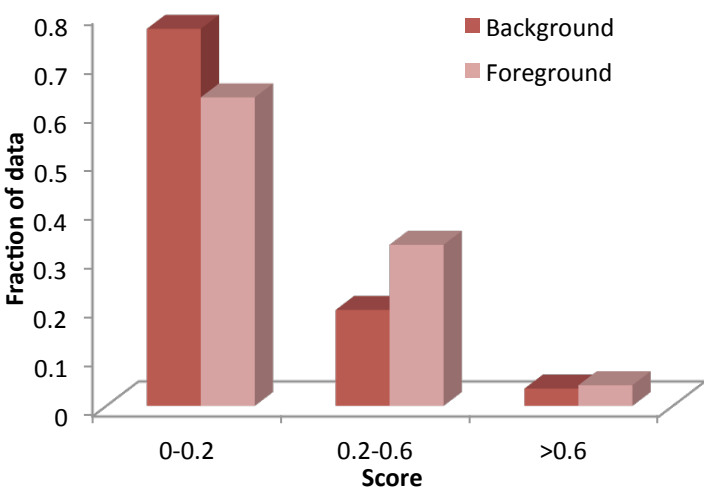

### Co-localization

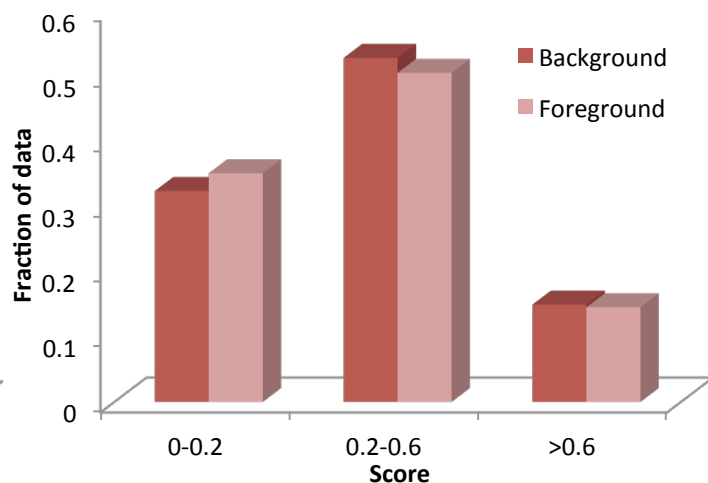

### Neural Network (NetSH2)

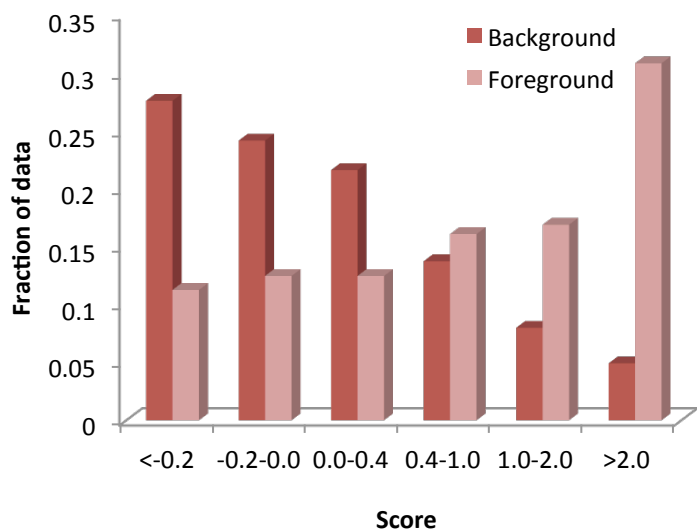

### Disorder

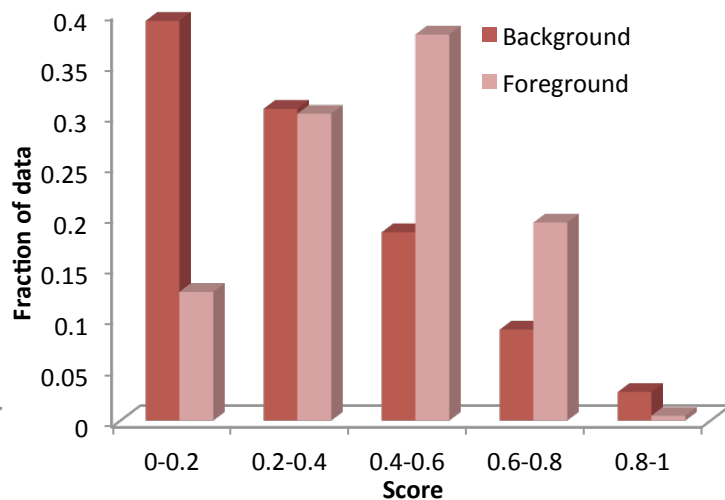

### Conservation

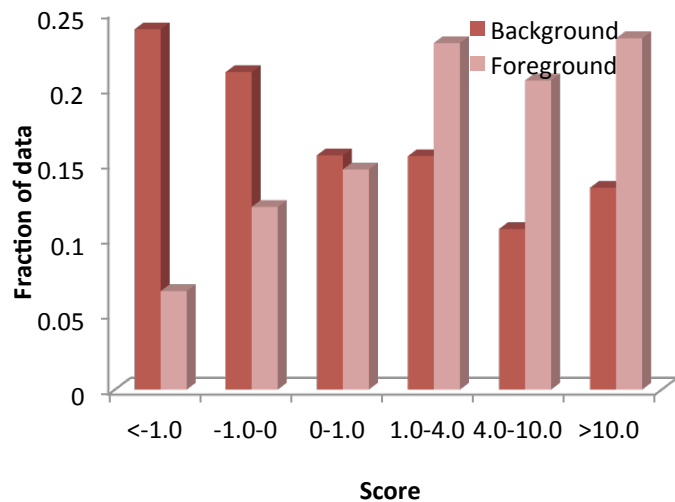

### Interactome distance

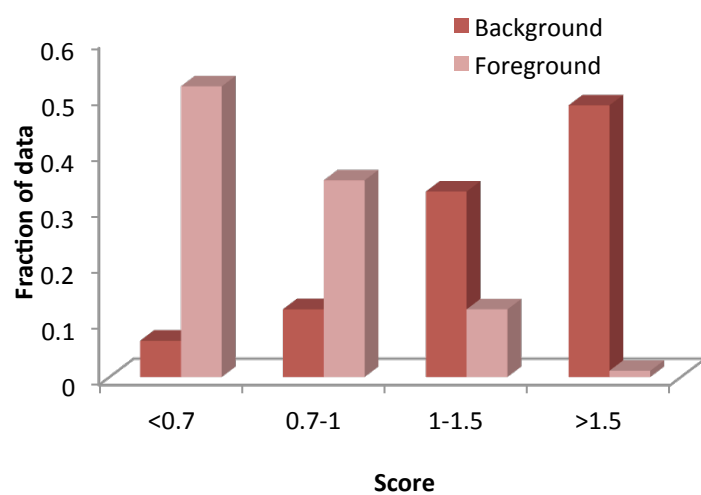



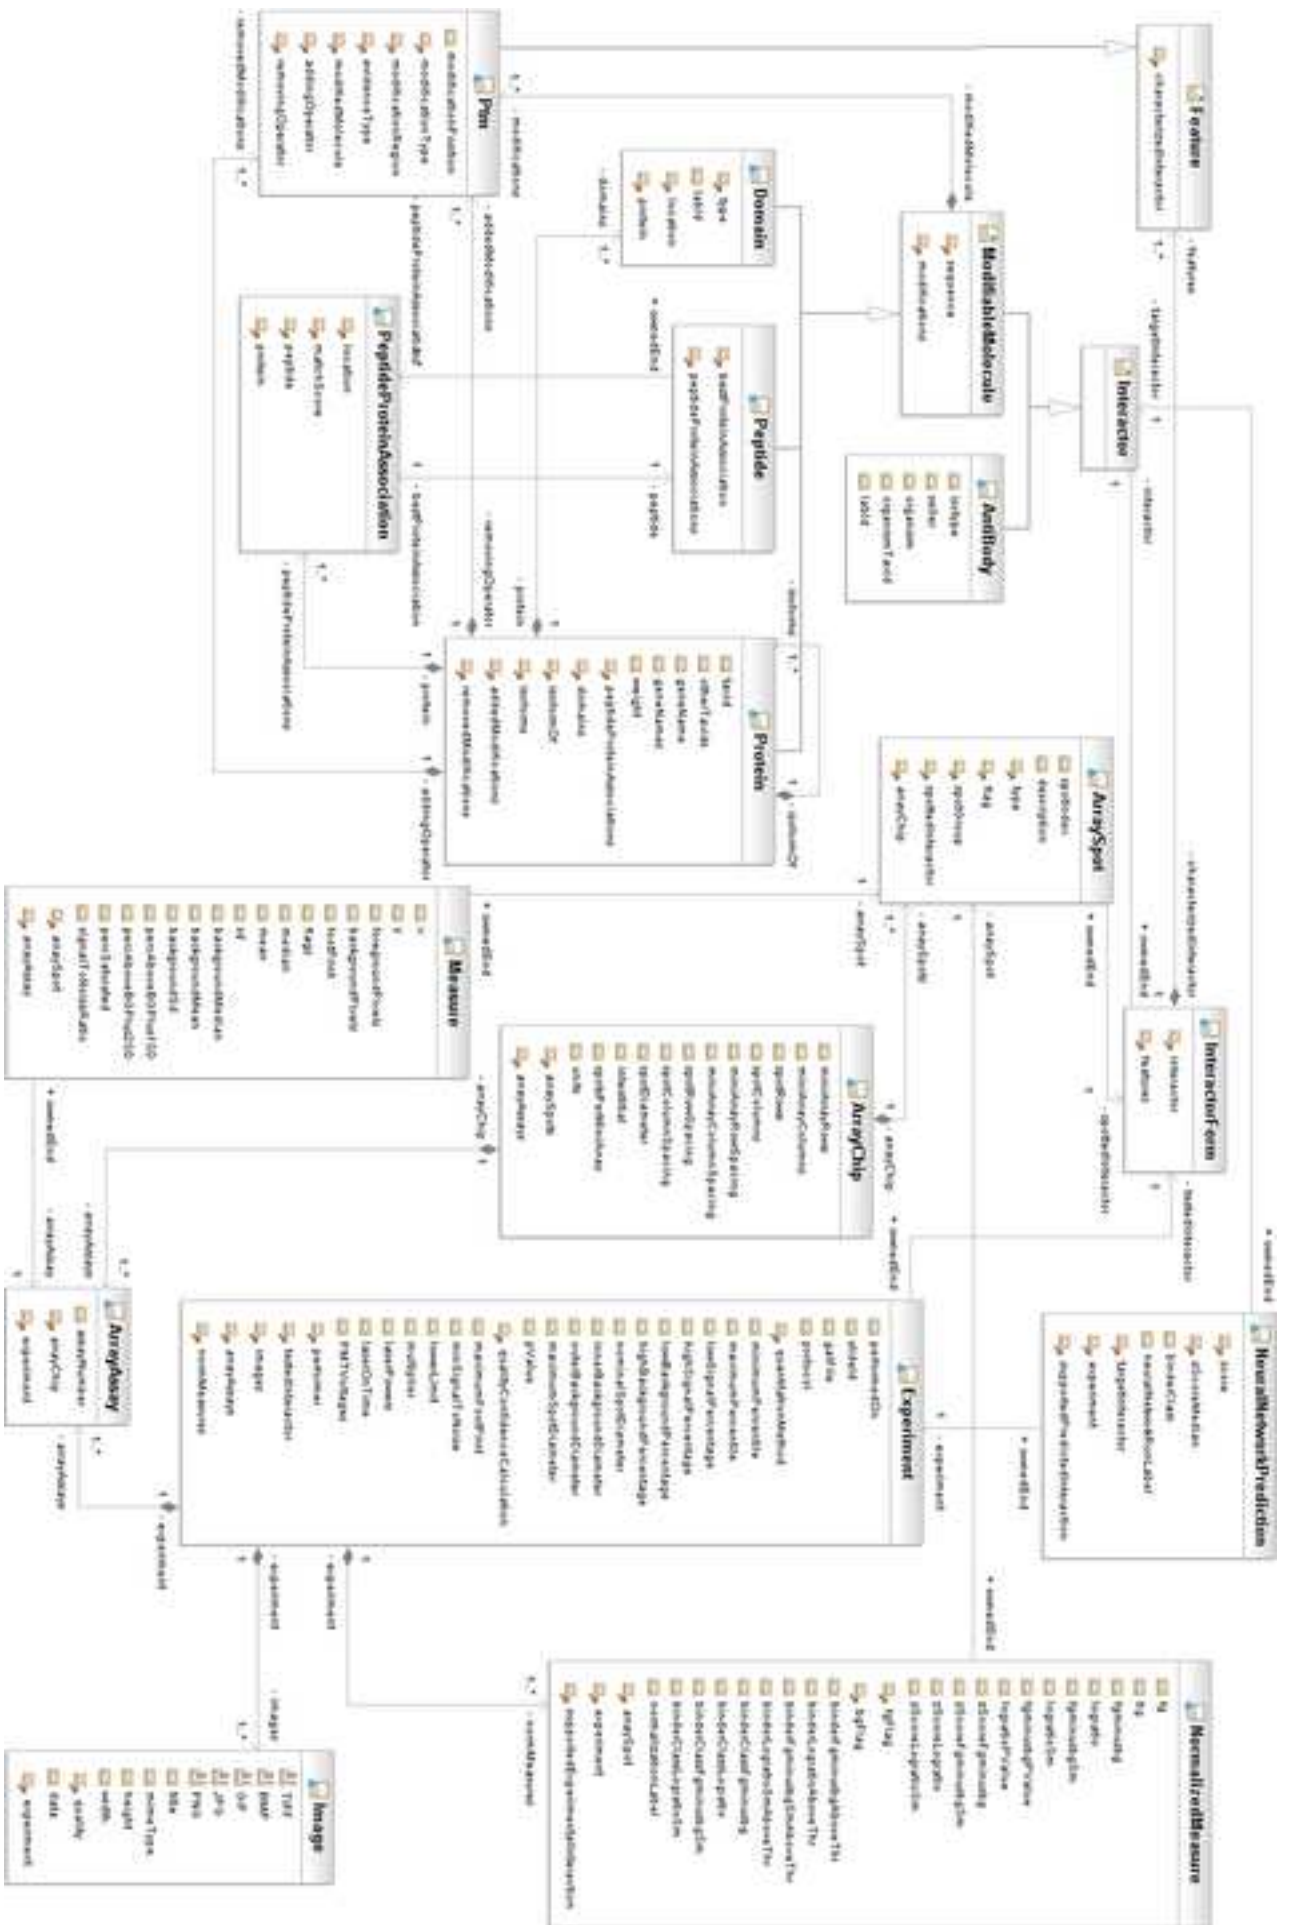

| PEP_ID | PEP_SEQ        | PEP_REF                | phosphoELM_REF         |
|--------|----------------|------------------------|------------------------|
| 1      | GNEPDKYPCNGQV  | gi 7656971 ref NP_0557 | NA                     |
| 2      | NLSQGGYEELERV  | gi 13124040 sp O14649  | NA                     |
| 3      | ALAAEGYYDIRRV  | gi 17368942 sp Q9H254  | NA                     |
| 4      | QHDEPCYWRLTRV  | gi 24212369 sp P82930  | NA                     |
| 5      | EAGKPIYSRYGSV  | gi 74738536 sp Q7L1V2  | NA                     |
| 6      | IVTESEYTSGHSV  | gi 23397016 sp Q9Y462  | NA                     |
| 7      | FTTMDLYKSSLCW  | gi 74762106 sp O43897  | NA                     |
| 8      | GTYEDYQSTAEW   | gi 108935929 sp P00491 | NA                     |
| 9      | KYLPDEYASVQAW  | gi 148709183 gb EDL411 | NA                     |
| 10     | LRRGTKYQRFPDW  | gi 146325737 sp Q658P3 | NA                     |
| 11     | PPCFDEYKMSKEW  | gi 56757653 sp Q13029  | NA                     |
| 12     | IGANPLYCDCNMQ  | gi 33112440 sp O94813  | NA                     |
| 13     | AFFNPKYQHEGFY  | gi 62901456 sp Q8NET8  | NA                     |
| 14     | ALVDLDYEDRPEY  | gi 22095550 sp Q9HCU4  | NA                     |
| 15     | IIEEGKYSLVMEY  | gi 60393639 sp Q13546  | NA                     |
| 16     | QFSKGVYAIFGFY  | gi 116242505 sp P42261 | NA                     |
| 17     | YLNNSNYEEGDEY  | gi 27151690 sp Q9UHW5  | NA                     |
| 18     | PPFNFSYSDYDMP  | gi 33112428 sp Q8TCW5  | NA                     |
| 19     | TRFDDWYLVVQMY  | gi 17368685 sp Q9BV94  | NA                     |
| 20     | GDSWEKYVHGVRV  | gi 2506872 sp P02751   | NA                     |
| 21     | AKLKDYIFNKYL   | gi 97045403 sp Q96M95  | NA                     |
| 22     | ALNSDKYIGMSVY  | gi 12643641 sp O75899  | NA                     |
| 23     | GQMKDLYHYITSY  | gi 108935880 sp Q16557 | NA                     |
| 24     | STPKVLYEIPDTY  | gi 74733187 sp Q9BU68  | NA                     |
| 25     | IENMGLYEDLSSA  | gi 147744560 sp O15360 | NA                     |
| 26     | LKDKEGYTSFWND  | gi 119573912 gb EAW53  | NA                     |
| 27     | WMYNEQYTFVSND  | gi 13123945 sp O95477  | NA                     |
| 28     | DEVELSYAKNGQD  | gi 126302554 sp Q00839 | NA                     |
| 29     | ECYDGSYAGNPQD  | gi 116242808 sp Q15022 | NA                     |
| 30     | SYIEEPYMDIDRD  | gi 25091357 sp Q8TEL6  | NA                     |
| 31     | YKSEVVYFDGQSA  | gi 21263499 sp Q9BZ76  | NA                     |
| 32     | APRPTDYLSWGTA  | gi 6174916 sp P54821   | NA                     |
| 33     | FNHTEDYVLLPDE  | gi 461848 sp Q05048    | CS [FNHTEDYVLLPDE Y]36 |
| 34     | NVPETNYTSDEEE  | gi 119589031 gb EAW68  | NA                     |
| 35     | IKAEELYEKDIEE  | gi 119621961 gb EAX015 | NA                     |
| 36     | LSPSDKYPGFGFE  | gi 13124629 sp O15353  | NA                     |
| 37     | KIDAFHYVQLGTA  | gi 74733765 sp Q9H857  | NA                     |
| 38     | SGYKEYYSIPVME  | gi 147742922 sp Q7Z5J8 | NA                     |
| 39     | ICFNNTSYKNGDPE | gi 117283 sp P05093    | CP NA                  |
| 40     | LLPNSHYEQVMATA | gi 20455027 sp Q9UJ83  | NA                     |
| 41     | FTFSPIYDKSAQE  | gi 51338734 sp O00462  | NA                     |
| 42     | NITDPEYGYLARE  | gi 119370323 sp Q16280 | NA                     |
| 43     | <<Marker>>     | contol_spot            | NA                     |
| 44     | QGFAPHYDDIEAF  | gi 74733619 sp Q9H6W3  | NA                     |
| 45     | AGVKEKYLSEYCF  | gi 1705710 sp P49961   | NA                     |
| 46     | KRSSSDYAQREDF  | gi 28201859 sp Q9BZV7  | NA                     |
| 47     | RIYESKYWKEECF  | gi 74760086 sp Q8NAV1  | NA                     |
| 48     | YPREGKYGHAACF  | gi 1708983 sp P52888   | NA                     |
| 49     | EHEGEYYMTPRDF  | gi 115502157 sp Q8IYU8 | NA                     |
| 50     | IHLNDIYSVVGIP  | gi 61248558 sp Q9BTF0  | NA                     |
| 51     | SAKDGDYWRLIP   | gi 115892 sp P16870    | CB NA                  |

|     |               |                                           |
|-----|---------------|-------------------------------------------|
| 52  | LKEANGYVLFQKP | gi 50949388 emb CAB70 NA                  |
| 53  | RASAEFYVQCSLT | gi 74732914 sp Q9BRQ3 NA                  |
| 54  | EGPEKEYISCQNT | gi 74721007 sp Q9UKL3  NA                 |
| 55  | HPSKPYYPGAPT  | gi 150383499 sp O15054 NA                 |
| 56  | VISPEKYDIKCAV | gi 119631194 gb EAX107 NA                 |
| 57  | FKTEIQYEKLADA | gi 109896161 sp Q8IZQ1 NA                 |
| 58  | DGDFTVYECPLA  | gi 22261810 sp Q9NQX5 NA                  |
| 59  | REKEDKYLFTILA | gi 74762719 sp Q9BZA8  NA                 |
| 60  | DEKCDYYFSVDAD | gi 62906878 sp O00469  NA                 |
| 61  | HSYNESYHCKDAD | gi 152112423 sp Q2KHM NA                  |
| 62  | KVEDPFYWVSPGV | gi 2497312 sp Q16653  NA                  |
| 63  | QMSKFSYPTVPGV | gi 150421532 sp Q5JPB2 NA                 |
| 64  | <<Marker>>    | control_spot NA                           |
| 65  | HFGENGYVEATKQ | gi 37999486 sp O95470  NA                 |
| 66  | HTFKGDYSTKKHV | gi 18202503 sp Q15223  NA                 |
| 67  | MWPERIYQSPYGV | gi 74756797 sp Q5VTH9 NA                  |
| 68  | REDNLYYGNLIV  | gi 147734568 sp Q86XM NA                  |
| 69  | YATLDVYNPFETR | gi 119573478 gb EAW53 NA                  |
| 70  | RKEIADYLAAGKD | gi 1723119 sp P53990  NA                  |
| 71  | KLTEGQYVLCRWT | gi 55958723 emb CAI156 [KLTEGQYVLCRWT Y 4 |
| 72  | HTSNDPYCFVEFY | gi 267131 sp Q01085  NA                   |
| 73  | MGQKDSYVGDEAQ | gi 119612724 gb EAW92 [MGQKDSYVGDEAQ Y :  |
| 74  | PNIMACYNELLQL | gi 23503044 sp O60658  NA                 |
| 75  | LFHEAPYISNHPF | gi 114593095 ref XP_001 NA                |
| 76  | QAVERQYVIPGMF | gi 3123225 sp P21399  NA                  |
| 77  | DGLETKYMEILRF | gi 27734865 ref NP_775 NA                 |
| 78  | PDDENKYFHNMQF | gi 74749827 sp Q75V66  NA                 |
| 79  | HAFDLEYHDTCSF | gi 72384339 ref NP_963 NA                 |
| 80  | ASEPISYVNFTIA | gi 20454827 sp Q9BXC9 NA                  |
| 81  | SDPKSRYDITGLH | gi 81175198 sp Q9UQP3 NA                  |
| 82  | EFRECGYCNINPH | gi 74732358 sp Q96MF0 NA                  |
| 83  | RRFEYKYSFKGPH | gi 22261801 sp P49257  NA                 |
| 84  | DFQWDYYDRMYSH | gi 108935845 sp P07910 NA                 |
| 85  | <<Marker>>    | control_spot NA                           |
| 86  | QREAEVYDSSQSH | gi 14194461 sp Q99996  NA                 |
| 87  | MGYWPTYVPMEVH | gi 55977850 sp Q13620  NA                 |
| 88  | QSTDDEYALDGKI | gi 46397678 sp Q13017  NA                 |
| 89  | AWCMEVYASEKEQ | gi 33112668 sp Q13615  NA                 |
| 90  | WLDETTYEWGYKI | gi 119616435 gb EAW96 NA                  |
| 91  | LISSEGYVSSKYA | gi 150421625 sp P01833 NA                 |
| 92  | NSFEPYMWWDYVA | gi 119569057 gb EAW48 NA                  |
| 93  | FLPKGAYIYNALI | gi 60267755 sp P26639  NA                 |
| 94  | WSRDPLYRDDPCK | gi 51315869 sp Q6PJ61  NA                 |
| 95  | GFERPKYFVPPDK | gi 119579560 gb EAW59 NA                  |
| 96  | IRHEVIYINLKDK | gi 119599627 gb EAW79 NA                  |
| 97  | FREKLAYAIPEK  | gi 266667 sp Q01959  NA                   |
| 98  | ALAEQVYMDWYEK | gi 56405304 sp O75643  NA                 |
| 99  | PYRKEAYLEMEFK | gi 71153483 sp Q14966  NA                 |
| 100 | CRDDPTYFAQQQK | gi 119620267 gb EAW99 NA                  |
| 101 | RFNMELYKLSGRK | gi 25090820 sp O95631  NA                 |
| 102 | FITVCDYTNPCTK | gi 18202671 sp Q99836  NA                 |
| 103 | LVRGTHYENLRSK | gi 24418474 sp Q96KK3  NA                 |



|     |                |                                             |
|-----|----------------|---------------------------------------------|
| 104 | KTDSFEYVDPVDG  | gj 152031655 sp Q15124 NA                   |
| 105 | VVSCSQYAQGCEG  | gj 1705632 sp P53634 C, NA                  |
| 106 | <<Marker>>     | contol_spot NA                              |
| 107 | GFPVEKYMDVSGL  | gj 2851475 sp P35453 H, NA                  |
| 108 | VPNSEEYHSHLFM  | gj 121948761 sp Q14CX, NA                   |
| 109 | ASKKLPYKNPHTL  | gj 56204806 emb CAI222, NA                  |
| 110 | TRDETNYGIPQRA  | gj 54037168 sp P63244 C, NA                 |
| 111 | STEDTWAYKMKIQ  | gj 146345452 sp Q9BS4, NA                   |
| 112 | FESENYEFDVRA   | gj 37999827 sp Q9Y5F7 , NA                  |
| 113 | IEEDGDYKVTFHM  | gj 50400545 sp Q8IZF2 C, NA                 |
| 114 | SAAVTSYANSASL  | gj 143811424 sp Q8WYE, NA                   |
| 115 | CTSPFSYKNVLSL  | gj 119606362 gb EAW85, NA                   |
| 116 | KVSAPYYSSWGTL  | gj 147744602 sp Q8N5A, NA                   |
| 117 | KISKGEYGNAGIM  | gj 109659849 ref NP_05, NA                  |
| 118 | MILNTIYEKVAIM  | gj 116242820 sp Q4KMC, NA                   |
| 119 | PLTTGVVYKMPPT  | gj 27735177 sp P16410 C [PLTTGVVYKMPPT Y 2C |
| 120 | PTGNHTYQEIAVP  | gj 27735219 sp P49023 F [PTGNHTYQEIAVP Y 40 |
| 121 | QLGQRIYQYIQR   | gj 3219996 sp Q13627 D [QLGQRIYQYIQR Y 27   |
| 122 | RALMDKYHVDNDL  | gj 56160856 ref AP_000, [RALMDKYHVDNDL Y 1  |
| 123 | RIEGTYGVVYRA   | gj 145559452 sp Q9UQ8, NA                   |
| 124 | RKGS GDYMPMSPK | gj 547738 sp P35568 IR, [RKGS GDYMPMSPK Y   |
| 125 | DIYSTDYRVGGR   | gj 94730402 sp P04629 , [DIYSTDYRVGGR Y 6   |
| 126 | DPSDPTYTSSLGG  | gj 76803655 sp P54753 E, NA                 |
| 127 | <<Marker>>     | contol_spot NA                              |
| 128 | DVYSTDYRRLFNP  | gj 134035335 sp Q16288, NA                  |
| 129 | EDADENYFINEED  | gj 12643788 sp Q92569 I [EDADENYFINEED Y 34 |
| 130 | EELDENYVPMNPN  | gj 90180201 sp Q13480 C [EELDENYVPMNPN Y 4  |
| 131 | EPDEILYVNMDEG  | gj 48429194 sp P30530 L [EPDEILYVNMDEG Y 81 |
| 132 | KNVVPVYDLLLEM  | gj 6166154 sp Q92731 E [KNVVPVYDLLLEM Y 48  |
| 133 | KIGEGTYGVVYKG  | gj 115922 sp P06493 CD [KIGEGTYGVVYKG Y 1   |
| 134 | SVQNPVYHNQPLN  | gj 2811086 sp P00533 E, [SVQNPVYHNQPLN Y 1  |
| 135 | SAASFEYTILDPS  | gj 119524 sp P19235 EP [SAASFEYTILDPS Y 42  |
| 136 | LTTNEEYLDLSQP  | gj 120049 sp P21802 FG [LTTNEEYLDLSQP Y 76  |
| 137 | FLRCINYYFFPSL  | gj 90110827 sp P17181 I [FLRCINYYFFPSL Y 46 |
| 138 | GTAEPDYGALYEG  | gj 130225 sp P19174 PL, [GTAEPDYGALYEG Y 7  |
| 139 | DKMAEAYSEIGMK  | gj 23830999 sp P20963 C [DKMAEAYSEIGMK Y 1  |
| 140 | SMKDEEYEQMVKE  | gj 126682 sp P25963 IKE [SMKDEEYEQMVKE Y 4  |
| 141 | NEGVATYAAVLF   | gj 461854 sp P35222 CT [NEGVATYAAVLF Y 6    |
| 142 | AKAVDGYVKPQIK  | gj 1174462 sp P42229 S, [AKAVDGYVKPQIK Y 69 |
| 143 | SVYESPYSDPEEL  | gj 1177044 sp P43403 Z, [SVYESPYSDPEEL Y 31 |
| 144 | AAPEARYTDIILY  | gj 13432140 sp P22455 F, NA                 |
| 145 | VLEDNDYGRAVDW  | gj 12643943 sp Q9Y243 , [VLEDNDYGRAVDW Y    |
| 146 | FSRPVKYEDVEHK  | gj 2499640 sp Q99759 M, NA                  |
| 147 | LEYDYEDENGDR   | gj 6685617 sp Q99683 M, NA                  |
| 148 | <<Marker>>     | contol_spot NA                              |
| 149 | PHHNDYKIHGSA   | gj 1710804 sp P38165 R, NA                  |
| 150 | NDMDDLYHNGRCG  | gj 586313 sp P38128 SM, NA                  |
| 151 | NNPAGLYSSENIS  | gj 20178312 sp O00151 I [NNPAGLYSSENIS Y 15 |
| 152 | VTGPHLYSIYPHG  | gj 17380263 sp Q99436 I, NA                 |
| 153 | RNYQQNYQNSESG  | gj 54040031 sp P67809 , [RNYQQNYQNSESG Y    |
| 154 | PQIQDLYGKVDFT  | gj 1170586 sp P46940 IC [PQIQDLYGKVDFT Y 17 |
| 155 | DDEMTGYVATRWWY | gj 2499600 sp Q16539 M [DDEMTGYVATRWWY Y    |

|     |               |                                               |
|-----|---------------|-----------------------------------------------|
| 156 | PVPNPDYEPIRKG | gj 1345708 sp P07766 C  [PVPNPDYEPIRKG Y 18   |
| 157 | MDNQGGYGSVGRM | gj 23503095 sp P31942 F  [MDNQGGYGSVGRM Y     |
| 158 | EAPSNIYVEVEDE | gj 143811460 sp Q9NP3  [EAPSNIYVEVEDE Y 30:   |
| 159 | LNLGRTYASGYAH | gj 51702204 sp Q9Y3S2  [LNLGRTYASGYAH Y 3     |
| 160 | HTGEKPYKCEECG | gj 110825754 sp Q9NZL  NA                     |
| 161 | LAMEATYINHNFS | gj 6685526 sp O15371 IF NA                    |
| 162 | HTGEKPYECVQCG | gj 10720410 sp P17028 z  [HTGEKPYECVQCG Y 3   |
| 163 | KDPDQLYTTLKNL | gj 13431548 sp Q92830 c  [KDPDQLYTTLKNL Y 73  |
| 164 | RFHTSTYDLPGPE | gj 51338794 sp P78559 f  NA                   |
| 165 | CHNQDGYSPSRQ  | gj 126073 sp P01130 LD  [CHNQDGYSPSRQ Y 8     |
| 166 | KSKQPLYSSIVTV | gj 17433153 sp O60245 I  [KSKQPLYSSIVTV Y 94  |
| 167 | STIMTDYNPNYCF | gj 146328566 sp Q9UM7  [STIMTDYNPNYCF Y 10    |
| 168 | GMARDIYRASYYR | gj 146328566 sp Q9UM7  [GMARDIYRASYYR Y 1:    |
| 169 | <<Marker>>    | contol_spot NA                                |
| 170 | LAQQGEYSEAIPI | gj 6225321 sp Q14318 FI  [LAQQGEYSEAIPI Y 26  |
| 171 | SKLSDSYSNTLPV | gj 73917636 sp Q9UQB8  [SKLSDSYSNTLPV Y 33    |
| 172 | TQPEPIYAESTKR | gj 118573870 sp Q86YV  [TQPEPIYAESTKR Y 41:   |
| 173 | NIGEDTYDIVIPV | gj 84029319 sp Q86T24 I  [NIGEDTYDIVIPV Y 442 |
| 174 | GKSELPEELWLE  | gj 125991851 sp Q9H70 c  [GKSELPEELWLE Y 4    |
| 175 | QPLCKPYTVVDVS | gj 118572719 sp Q9H79 z  [QPLCKPYTVVDVS Y 47  |
| 176 | SNGNEAYENCLRF | gj 1177049 sp P46974 ZI  NA                   |
| 177 | QILESSYNNSNHT | gj 114814 sp P14164 BA  NA                    |
| 178 | SISSPEYTFGQFS | gj 462626 sp P33749 MS  NA                    |
| 179 | QSKQPAYVNKQPQ | gj 131653 sp P25502 PU  NA                    |
| 180 | PISASLYVTTNNT | gj 9910692 sp Q07928 G  NA                    |
| 181 | HCEVESYPQVPPV | gj 113022 sp P21192 AC  NA                    |
| 182 | QCCEDAYLILRRH | gj 1171955 sp P42338 PI  NA                   |
| 183 | GMVCSAYDNVNKV | gj 119554 sp P28482 MK  NA                    |
| 184 | INFDPVYKVKPNP | gj 729833 sp P40189 IL6  NA                   |
| 185 | TPSSPMYVDLLKH | gj 1170596 sp P45985 M  NA                    |
| 186 | IQFTDGYEVKEDI | gj 1730070 sp P51812 K  NA                    |
| 187 | EKDETEYEYSGSE | gj 29427585 sp O95819 I  NA                   |
| 188 | HYWDDKYWFENTM | gj 119596609 gb EAW76  NA                     |
| 189 | LWEIPPYETKGVM | gj 12230553 sp Q92545 f  NA                   |
| 190 | <<Marker>>    | contol_spot NA                                |
| 191 | WRRSGKYVYKPVM | gj 22002033 sp O95260 v  NA                   |
| 192 | DCSMTSYSGNQCN | gj 124106290 sp Q9Y4C c  NA                   |
| 193 | FPADELYGIVGAN | gj 20138731 sp Q9HCC0  NA                     |
| 194 | HLQSTDYGNFLAN | gj 47606646 sp P61421 v  NA                   |
| 195 | FYKEGLYLVKAIN | gj 119622470 gb EAX02 c  NA                   |
| 196 | ISSSPIYTAWNGN | gj 113430889 ref XP_001  NA                   |
| 197 | RVNKPPYPKLGGN | gj 1346733 sp P13796 PI  NA                   |
| 198 | VNKESQYGFPGN  | gj 71153252 sp Q9H5U8  NA                     |
| 199 | DGWEWAYCETNIN | gj 20455033 sp P78504 c  NA                   |
| 200 | HLDSGDYICQAKN | gj 37081671 sp Q9P2V4  NA                     |
| 201 | KFSETYYTRILPN | gj 119628642 gb EAX08 z  NA                   |
| 202 | VNCRNEYAMIGNN | gj 23396597 sp Q9BXR6  NA                     |
| 203 | DNEDWWYGSIGKG | gj 73921659 sp Q8N157  NA                     |
| 204 | FNSPGSYKTNAAA | gj 71153802 sp Q71RC2  NA                     |
| 205 | GGSDQNYDIVTIG | gj 73920059 sp Q96PE3  [GGSDQNYDIVTIG Y 35    |
| 206 | KLTVDAYHNKPIG | gj 7673998 sp Q13316 D  NA                    |
| 207 | ANSSTLYRNTDRQ | gj 47117818 sp O75914 I  NA                   |

|     |                |                            |
|-----|----------------|----------------------------|
| 208 | EREKEDYLHLKRQ  | gi 26006845 sp Q9BYZ6 NA   |
| 209 | GESMKTYAEVDQR  | gi 118572321 sp Q96RU NA   |
| 210 | KANEPGYNPVKVN  | gi 30913216 sp Q9NZB8 NA   |
| 211 | NIFNKDYIFVPVN  | gi 119370527 sp Q9BQF NA   |
| 212 | TCCEIGYCEIKVN  | gi 122066060 sp Q9NZJ NA   |
| 213 | MGFNNGYAVNPAR  | gi 2497938 sp Q92482 A NA  |
| 214 | QLERDAYVQALAR  | gi 146329988 sp Q9Y6D NA   |
| 215 | TISFEEYIRVKAR  | gi 121941773 sp Q2TAL NA   |
| 216 | VGNQPPYSRINAR  | gi 134798 sp P11277 SP NA  |
| 217 | ASFNMSYANPALG  | gi 1708274 sp P55317 HI NA |
| 218 | DVVKTRYMNSALG  | gi 2497981 sp P55851 U NA  |
| 219 | AASPPLYSQVPDR  | gi 12644406 sp Q13461 I NA |
| 220 | ELEFVDYVFHGER  | gi 119581049 gb EAW60 NA   |
| 221 | LLKDDVYCELAER  | gi 74712933 sp Q76M96 NA   |
| 222 | QVYMDWYEKFQDR  | gi 56405304 sp O75643 I NA |
| 223 | TGEKIAYVYPDER  | gi 25091217 sp Q8WTS NA    |
| 224 | CWDSFIYESSAFR  | gi 119619483 gb EAW99 NA   |
| 225 | EPSVDDYMGMIKR  | gi 6016308 sp Q02556 IF NA |
| 226 | GLDPEGYGNPDFC  | gi 22095552 sp Q9NYQ7 NA   |
| 227 | INCERYVPEGEC   | gi 67460590 sp Q9NZV1 NA   |
| 228 | KRMKSEYKNAEC   | gi 143811449 sp Q96EQ NA   |
| 229 | NTNFEDYESSHFC  | gi 68053324 sp Q9P0V9 NA   |
| 230 | RQENLRYNNMLKR  | gi 34534829 dbj BAC871 NA  |
| 231 | AKSVTQYVFLAQR  | gi 126215700 sp Q8IZU8 NA  |
| 232 | FRCPPDYPIHPPR  | gi 134035344 sp Q9H83 NA   |
| 233 | LNCFTDYKDQGPR  | gi 32470620 sp Q9Y6K5 NA   |
| 234 | TNARDTYVSSFPR  | gi 1174652 sp P23193 T NA  |
| 235 | DLANDIYNINLQR  | gi 913523 gb AAB34231 NA   |
| 236 | LVSNSTYRKPTL   | gi 32472704 ref NP_865 NA  |
| 237 | VDEYEHYERVENG  | gi 55976620 sp Q9UNH5 NA   |
| 238 | DGSPGKYMSHLAS  | gi 51315898 sp Q76MJ5 NA   |
| 239 | FLVKSGYAFVDCP  | gi 74761835 sp Q9NZI8 I NA |
| 240 | KCSMCKYASVEAS  | gi 30172878 sp Q8NI51 E NA |
| 241 | VHCREGYSRSPTL  | gi 1718191 sp P51452 D NA  |
| 242 | VHNCFHVEDVAVL  | gi 88683069 gb AAI1384 NA  |
| 243 | CIYGEGYSNAHES  | gi 6685974 sp O43760 S NA  |
| 244 | SLWKWKYEELKES  | gi 71153214 sp Q68D86 NA   |
| 245 | YWMEDIYTPGYDS  | gi 32699623 sp Q9UPX6 NA   |
| 246 | EAVELCYKNVNES  | gi 38258635 sp Q96RI9 NA   |
| 247 | LNSEGLYRVSGFS  | gi 21903393 sp P15882 C NA |
| 248 | RTSETSYLNEAFS  | gi 73620041 sp Q8N9R8 NA   |
| 249 | LLLANAYIYVVQL  | gi 1705571 sp P32004 L1 NA |
| 250 | SGRETIYPNASLL  | gi 3172147 gb AAC1843 NA   |
| 251 | QSEDCLYLNIIYVP | gi 31076822 sp Q8N2Q7 NA   |
| 252 | AATVGHYTAVQNS  | gi 2498217 sp Q15078 C NA  |
| 253 | ETTKNVYEEIAAP  | gi 399227 sp Q02224 CE NA  |
| 254 | MGYWPTYVPMEVH  | gi 55977850 sp Q13620 C NA |
| 255 | FLASPEYVNLPIN  | gi 121746 sp P09211 GS NA  |
| 256 | RTSLDLYANVIHC  | gi 1708404 sp P51553 ID NA |
| 257 | CWCSYKYLNAGAG  | gi 3913982 sp Q16719 K NA  |
| 258 | LNSSRHLYLNIRYT | gi 21431783 sp O43451 I NA |
| 259 | RADLGAYLNPRPP  | gi 17369917 sp Q9Y3R4 NA   |

|                    |                                              |
|--------------------|----------------------------------------------|
| 260 LGHPKVVYINLDKE | gj 6093600 sp O75380 N NA                    |
| 261 FVGTRSYMAPERL  | gj 547915 sp P36507 MP NA                    |
| 262 SAGCAAYMAPERI  | gj 6831583 sp O14733 M NA                    |
| 263 TSMSPDYPNPMFE  | gj 38258929 sp P78527 F NA                   |
| 264 AIAVDRYLVRVCLT | gj 1351831 sp P33765 A NA                    |
| 265 SVGTHGYMAPEVL  | gj 116241253 sp P35626 NA                    |
| 266 ITSPFKYQSLTK   | gj 127796459 gb AAH12 [ITSPFKYQSLTK Y 141    |
| 267 MKGDVKYADIESS  | gj 129890 sp P09619 PG [MKGDVKYADIESS Y 7€   |
| 268 LEGRHIYVVPDP   | gj 129892 sp P16234 PG NA                    |
| 269 NRGTEYGFIVT    | gj 50403770 sp Q13332 I NA                   |
| 270 WSKEGFYAVVIFL  | gj 134039192 sp Q15256 NA                    |
| 271 GVPDSYINASFI   | gj 126467 sp P18433 PT  NA                   |
| 272 LQUESTGYMAPTLR | gj 18202506 sp Q15413 I NA                   |
| 273 EVQKDTYVMAVNC  | gj 41017504 sp Q9HC56 NA                     |
| 274 LFLKDPYSWPAPC  | gj 33302597 sp O75907 I NA                   |
| 275 LRGMDDYASGAPC  | gj 55958905 emb CA115€ NA                    |
| 276 AAVEEQYSCDYGS  | gj 730052 sp Q00325 MF NA                    |
| 277 LRFSPGYAIEKHS  | gj 6175083 sp P06133 UI NA                   |
| 278 PTFGPCYINLYGS  | gj 20137708 sp O75923 I NA                   |
| 279 FSWKESYRSTMS   | gj 57013009 sp Q9H3D4 NA                     |
| 280 LKAMDGYFNLTMS  | gj 1730136 sp P51993 FI NA                   |
| 281 APPGEEYGDGSPS  | gj 119576126 gb EAW55 NA                     |
| 282 GDDSEIYEILSPS  | gj 119605696 gb EAW85 NA                     |
| 283 LGPSDIYLLDPLS  | gj 71153524 sp Q9BQK8 NA                     |
| 284 ASLSPQYVSYNQS  | gj 1705571 sp P32004 L1 NA                   |
| 285 PASKTGYSFTATS  | gj 116256100 sp Q5T2D NA                     |
| 286 SQDKNLYHNLCTS  | gj 2497824 sp Q14566 M NA                    |
| 287 GVGRDKYEPAAVS  | gj 114374 sp P05023 AT [GVGRDKYEPAAVS Y 1    |
| 288 ACEEIAQVAGVS   | gj 12643896 sp Q9UL36  NA                    |
| 289 ETPNFKYAQLNVS  | gj 119594238 gb EAW73 NA                     |
| 290 LESKKEYNSIGVS  | gj 46396931 sp Q8IW52  NA                    |
| 291 HSSNSNYHDSWET  | gj 68052314 sp Q5T200  NA                    |
| 292 QDGKDDYKKQKET  | gj 60392986 sp Q92878 I NA                   |
| 293 ASADCHYIDVKGT  | gj 6093646 sp O14832 P NA                    |
| 294 IRDENTYKICTWL  | gj 74731081 sp Q96A25  NA                    |
| 295 QDRSDIYMSRRFT  | gj 16552245 dbj BAB712 NA                    |
| 296 YTCMFTYASQGGT  | gj 61221730 sp Q969H8  NA                    |
| 297 RPKDEVYSKYYP   | gj 41019536 sp P51692 € [RPKDEVYSKYYP Y 67   |
| 298 TLNSDGYTPEPAR  | gj 1177044 sp P43403 Z/[TLNSDGYTPEPAR Y 2€   |
| 299 ALFDRIYTHQSDV  | gj 120046 sp P11362 FG NA                    |
| 300 DNDDDLYG       | gj 6094447 sp P55072 TI [DNDDDLYG Y 805 P55€ |
| 301 EEGAPDYENLQEL  | gj 14194891 sp O43561 I NA                   |
| 302 GCPEKVEYELMRAC | gj 85681908 sp P00519 /[GCPEKVEYELMRAC Y 4   |
| 303 KRQVGDYENVIPD  | gj 6166019 sp P20273 CI [KRQVGDYENVIPD Y 8€  |
| 304 EDDQEVYDDVAEQ  | gj 6166197 sp O15117 F [EDDQEVYDDVAEQ Y 5    |
| 305 ETDKEYYTVKDDR  | gj 125060 sp P23458 JAI [ETDKEYYTVKDDR Y 1€  |
| 306 RAKIQDYHILTRK  | gj 12643404 sp O60674 [RAKIQDYHILTRK Y 221   |
| 307 SEDIKSYTVRQL   | gj 131467 sp P18031 PTI [SEDIKSYTVRQL Y 15€  |
| 308 APTSFGYDKPHVL  | gj 124474 sp P15260 INC [APTSFGYDKPHVL Y 4€  |
| 309 KMNEVYSTLNFE   | gj 3172147 gb AAC1843 [KMNEVYSTLNFE Y 4€     |
| 310 LGRREEYDVLDKR  | gj 23830999 sp P20963 C [LGRREEYDVLDKR Y 8€  |
| 311 SKPKKSYIATQGC  | gj 84028248 sp Q06124 I [SKPKKSYIATQGC Y 32  |

|     |                |                                              |
|-----|----------------|----------------------------------------------|
| 312 | TFIGTPYWMAPEV  | gj 119622212 gb EAX01 [TFIGTPYWMAPEV Y 16    |
| 313 | ETEENIQVPTSQ   | gj 150421536 sp O75553 [ETEENIQVPTSQ Y 22    |
| 314 | KGTQADYAEVKFQ  | gj 118572721 sp Q96LC7 [KGTQADYAEVKFQ Y 6    |
| 315 | EDIKSYTVRQLE   | gj 131467 sp P18031 PT [EDIKSYTVRQLE Y 15:   |
| 316 | FDFNGLPYLGPPHS | gj 1345923 sp P32927 IL [FDFNGLPYLGPPHS Y 5: |
| 317 | HDHNIPYKWTAPE  | gj 8928302 sp Q13882 P [HDHNIPYKWTAPE Y 3:   |
| 318 | KHKEDVYENLHTK  | gj 131469 sp P29350 PT [KHKEDVYENLHTK Y 5:   |
| 319 | HSPPPAYTPMSGN  | gj 3913590 sp Q15303 E [HSPPPAYTPMSGN Y 1    |
| 320 | QKKEGVYDVPKSK  | gj 150421536 sp O75553 [QKKEGVYDVPKSK Y 2    |
| 321 | QKFQVYYLGNVPV  | gj 12229629 sp O00213 / [QKFQVYYLGNVPV Y 5-  |
| 322 | SPSPTTYRMFRDK  | gj 143811366 sp P11274 [SPSPTTYRMFRDK Y 3:   |
| 323 | VMLGKEYVVGKTSL | gj 23396831 sp Q969Q5 [VMLGKEYVVGKTSL Y 1:   |
| 324 | EGVWKKYSLTVAV  | gj 85681908 sp P00519 / [EGVWKKYSLTVAV Y 2:  |
| 325 | IDAFSDYANFK    | gj 126467 sp P18433 PT [IDAFSDYANFK Y 798 P  |
| 326 | PAEDSTYDEYEND  | gj 2498954 sp Q14247 S [PAEDSTYDEYEND Y 4:   |
| 327 | FITC           | contol_spot NA                               |
| 328 | IgG            | contol_spot NA                               |
| 329 | pY             | contol_spot NA                               |
| 330 | FITC           | contol_spot NA                               |
| 331 | IgG            | contol_spot NA                               |
| 332 | pY             | contol_spot NA                               |
| 333 | HELGQDYEHVTML  | gj 116242799 sp Q01082 NA                    |
| 334 | SKGGGGYTCQSGS  | gj 115502381 sp P15924 NA                    |
| 335 | YEYPSRYQKDVYD  | gj 8134360 sp Q14511 C NA                    |
| 336 | DREDDQYSHLQGN  | gj 115993 sp P09693 CD [DREDDQYSHLQGN Y 1    |
| 337 | VTVVSQYDNLEDY  | gj 131573277 gb ABO33 NA                     |
| 338 | KGRARQYTSPEEI  | gj 2498464 sp Q13442 H NA                    |
| 339 | EAEESQYDSGIES  | gj 14548073 sp O00221 I NA                   |
| 340 | HTGERPYKCQTCE  | gj 152031673 sp Q92766 NA                    |
| 341 | GDDLDPYYRGSHA  | gj 12585290 sp Q9P286 NA                     |
| 342 | KKNKDKYVGVSSD  | gj 41016993 sp Q14677 I NA                   |
| 343 | LSAEENYESCPPS  | gj 47117044 sp O75581 I NA                   |
| 344 | GSISNMYAVNLAR  | gj 116241317 sp Q9Y60 NA                     |
| 345 | IKRKIPYILKRQL  | gj 2828196 sp P30990 N NA                    |
| 346 | KYKRPGYGAYDAF  | gj 124200 sp P05198 IF2 NA                   |
| 347 | AYADSYYYEDGDQ  | gj 41281911 ref NP_848 NA                    |
| 348 | AADRNHYRRYPRR  | gj 54040031 sp P67809 NA                     |
| 349 | RAYADSYYYEDGD  | gj 41281911 ref NP_848 NA                    |
| 350 | EDDFLEYDQEHIR  | gj 24418367 sp Q9UPY3 NA                     |
| 351 | ISSPLLYPTIMTQ  | gj 38372702 sp Q8NGJ0 NA                     |
| 352 | PLSDVLYGRVADF  | gj 116241273 sp Q10588 NA                    |
| 353 | HMDDGGYSMNFM   | gj 23503093 sp P38159 f NA                   |
| 354 | LLEGNFYGSLFSV  | gj 14285603 sp Q12879 I NA                   |
| 355 | IIEDPYGNDSD    | gj 1709543 sp P24666 PI NA                   |
| 356 | LMSVDRYLAVVHA  | gj 1707884 sp P51685 C NA                    |
| 357 | VRGSGSYEYPVAE  | gj 8928556 sp P36382 C NA                    |
| 358 | MSEYPTYHTHGRY  | gj 547937 sp P15941 MU [MSEYPTYHTHGRY Y 1    |
| 359 | PPKGLMYSVNP    | gj 38605729 sp Q9NS71 NA                     |
| 360 | FPAEDTYHPMSEY  | gj 547937 sp P15941 MU [FPAEDTYHPMSEY Y 1:   |
| 361 | KIDRHMYSLSYK   | gj 51338661 sp P84098 f NA                   |
| 362 | VLKRRGYLLGINL  | gj 30316282 sp Q9BXA7 NA                     |
| 363 | MQDYPNYKYP     | gj 20532272 sp Q9BT81 NA                     |

|                    |                                             |
|--------------------|---------------------------------------------|
| 364 LEARKAYVNMSLF  | gi 549081 sp P35590 TIE [LEARKAYVNMSLF Y 11 |
| 365 PKSVTDYDFAPFL  | gi 122065628 sp Q9UM5 NA                    |
| 366 AGSTALYWACHGG  | gi 108885279 sp Q92882 NA                   |
| 367 MHATSQYMWGVQD  | gi 112894 sp P21580 TN NA                   |
| 368 PRAPSGYSQPPSV  | gi 120659962 gb AAI306 NA                   |
| 369 LPFYEVYGGELIRP | gi 56405390 sp Q9Y6X2  NA                   |
| 370 PYIAWGYPNLKSV  | gi 133021 sp P18124 RL NA                   |
| 371 RREFEVYGPRI    | gi 13635663 sp P08621 F NA                  |
| 372 ACRVAPYVNVGAL  | gi 145559528 sp O60902 NA                   |
| 373 LLDDEEYEEIVED  | gi 267188 sp P26368 U2 NA                   |
| 374 CHIDALYPNVENM  | gi 30316344 sp O15457 I NA                  |
| 375 CIYNTTYLNVQRE  | gi 112877 sp P02763 A1 NA                   |
| 376 ESHIEIYGGATKW  | gi 77416871 sp Q15818 I NA                  |
| 377 IRAHTPYINIYNC  | gi 115968 sp P11836 CD NA                   |
| 378 ESRSEIYGLVQRC  | gi 34395525 sp Q9NZN5 NA                    |
| 379 CQELDTYLIPQIP  | gi 728984 sp P38398 BR NA                   |
| 380 SDRSAWYMGPVSR  | gi 1169094 sp P46109 C NA                   |
| 381 FYDFFRYVEMSTF  | gi 15214082 sp Q9Y376  NA                   |
| 382 LQMAQIYNALSE   | gi 3913115 sp Q92858 A NA                   |
| 383 QLRRAAAYLNLSQE | gi 88911273 sp Q12873  NA                   |
| 384 PPVIIKYIIINRF  | gi 143811385 sp O60673 NA                   |
| 385 RIEIATYLNLSSEK | gi 27923786 sp Q9H4S2  NA                   |
| 386 LPAGELYGWAVET  | gi 116242593 sp Q92985 NA                   |
| 387 TETRTPYNIIFRI  | gi 119370323 sp Q16280 NA                   |
| 388 DTKFRNYLIPKGT  | gi 117225 sp P10632 CP NA                   |
| 389 QVKKKLYEEIDQN  | gi 117283 sp P05093 CP NA                   |
| 390 RPEGAEYINPGER  | gi 76803797 sp Q99698 I NA                  |
| 391 VIVLGLYIYVTYK  | gi 1709292 sp P55011 S NA                   |
| 392 THNWTVYLNPRRS  | gi 90110050 sp Q04671 I NA                  |
| 393 KICANHITPMME   | gi 1172837 sp P43487 R NA                   |
| 394 DLKSDLYIGGVAK  | gi 17369704 sp Q9ULB1  NA                   |
| 395 MFENPLYGSLSSF  | gi 119591435 gb EAW71 [MFENPLYGSLSSF Y 1C   |
| 396 DLSNSLYKRMPAT  | gi 13124346 sp O76041 I NA                  |
| 397 KKHSQHYQIPDDF  | gi 12643365 sp Q9UPN9 NA                    |
| 398 RPCLQGYTTAAEL  | gi 51315841 sp Q14435  NA                   |
| 399 H1:17          | contol_spot NA                              |
| 400 H5:17          | contol_spot NA                              |
| 401 LWKDIEYVTNDNV  | gi 33112457 sp Q86SS6  NA                   |
| 402 RVPSGGYSSINNV  | gi 93195043 sp Q9UKM7 NA                    |
| 403 EPLMEEYAIAAQV  | gi 113697 sp P23109 AM NA                   |
| 404 IGPPDKYSNLRPV  | gi 71153199 sp Q96IL0 C NA                  |
| 405 SKVECTYISIDQV  | gi 30923294 sp Q12765  NA                   |
| 406 AEKTDYQYRVARV  | gi 116241321 sp Q9Y3R NA                    |
| 407 NYEAPKYHIPYWV  | gi 8488997 sp Q15738 N NA                   |
| 408 YLRMDDYCRKDD   | gi 28380083 sp Q9HCD5 NA                    |
| 409 EFEKLLYKIFGED  | gi 33112639 sp O43301 I NA                  |
| 410 EEEEDGYRAVLMQ  | gi 1008842 gb AAC4191 NA                    |
| 411 WWGEPYRNGQYV   | gi 119570971 gb EAW50 NA                    |
| 412 EKGEERYICWYCW  | gi 17368959 sp Q9H4Q3 NA                    |
| 413 IPQDGDYEFKLSW  | gi 13124559 sp Q13043  [IPQDGDYEFKLSW Y 4   |
| 414 TGSKDGYKLPWTW  | gi 119592793 gb EAW72 NA                    |
| 415 SGAEDVYTSLGAA  | gi 2454302 gb AAB7181 NA                    |



|                    |                                          |
|--------------------|------------------------------------------|
| 416 FVKCERYKETSCY  | gi 59803114 sp Q9NVE5 NA                 |
| 417 KTPHGDYIEFPCY  | gi 126407 sp P09917 LO NA                |
| 418 LTTKPDYAGHQLQ  | gi 74735576 sp O95149  NA                |
| 419 VINKDEYYSRPLQ  | gi 118186 sp P28325 CY NA                |
| 420 EDKSPEYFYVGLY  | gi 23503099 sp O60636  NA                |
| 421 KPECEGYDPNALY  | gi 116241332 sp Q9BTC NA                 |
| 422 RMRAPDYTTPEMY  | gi 9087218 sp P35968 V NA                |
| 423 YRNEGFYADPYLY  | gi 147733121 sp Q5T5P2 YRNEGFYADPYLY Y 3 |
| 424 IVYEDPYQVSLQY  | gi 74732294 sp Q96M34  NA                |
| 425 IVIDKSYMNP GDQ | gi 12643310 sp Q92754  NA                |
| 426 GLPVTSYVSINSA  | gi 13878435 sp Q9Y5I4 F NA               |
| 427 HVSDWTYSEGALD  | gi 116241278 sp P23280 NA                |
| 428 VTTKELYPEFGLD  | gi 119608174 gb EAW87 NA                 |
| 429 IKEEKSYSIEPMD  | gi 109098774 ref XP_001 NA               |
| 430 TVEEVLYHIPWLD  | gi 119600085 gb EAW79 NA                 |
| 431 CGTEVRYVIDYYD  | gi 1705694 sp P53701 C NA                |
| 432 FGAVDLYVSTSYD  | gi 46395756 sp Q7Z7M0 NA                 |
| 433 MSELPSYGEMAAE  | gi 146286138 sp Q8NDI1 NA                |
| 434 VLFMTGYAEKAAE  | gi 7019233 gb AAF3525 NA                 |
| 435 HQVEEDYLFEKAE  | gi 119620706 gb EAX00 NA                 |
| 436 CSSELKYSMELDE  | gi 71151883 sp Q5JRC9  NA                |
| 437 LKYNNVVYPPWG   | gi 1352525 sp P48065 S NA                |
| 438 AGEATAYASKDLE  | gi 1718154 sp P49767 V NA                |
| 439 IMPADYYCNTLTA  | gi 23822260 sp Q9BYX2 NA                 |
| 440 FNAMGKYVDKRLE  | gi 2851393 sp P16435 N NA                |
| 441 EFQEVKYSRCSGA  | gi 90110017 sp O95672 I NA               |
| 442 KASDWEYTITVSA  | gi 124056471 sp Q9BVG NA                 |
| 443 <<Marker>>     | contol_spot NA                           |
| 444 RIDNDGYGFVTTE  | gi 2493462 sp Q15293 R NA                |
| 445 VRWKLKYVKTTE   | gi 113427238 ref XP_001 NA               |
| 446 VDSGPTYNEMNTA  | gi 24211441 sp Q13443  NA                |
| 447 YQEAEDYPYGPVE  | gi 114152779 sp Q12830 NA                |
| 448 DNSNILYVYPKAF  | gi 34528471 dbj BAC855 NA                |
| 449 KWCSLPYEDSTWE  | gi 148877246 sp Q9P2D NA                 |
| 450 SPGESAYQKLGLT  | gi 68052323 sp Q6NYC8 NA                 |
| 451 CSYNEQYLDTYRG  | gi 74756797 sp Q5VTH9 NA                 |
| 452 GTFEFYASRWKA   | gi 109240550 ref NP_00 NA                |
| 453 REENKLYKRTALA  | gi 55976785 sp Q8IZT6  NA                |
| 454 ALSVERYVAVVHP  | gi 74761608 sp Q9HB89  NA                |
| 455 EGDEVTYKMCPIP  | gi 32129852 sp Q9Y534  NA                |
| 456 CRDDCKYECMWVT  | gi 119580997 gb EAW60 NA                 |
| 457 ISCQDIYCNLGWT  | gi 126302583 sp P80108 NA                |
| 458 ASEGLYLDSEAV   | gi 74749881 sp Q7L211  NA                |
| 459 VWKENKYMKRDL   | gi 33604031 gb AAH562 NA                 |
| 460 WLKEQGYDVIAYL  | gi 20141195 sp P00966  NA                |
| 461 QNSSLDYDKVAAV  | gi 38372728 sp Q8NGM NA                  |
| 462 REDEEYKFFFEV   | gi 93141285 sp O00255 I NA               |
| 463 ASRPETYVATEFV  | gi 46395992 sp Q9H9S5  NA                |
| 464 <<Marker>>     | contol_spot NA                           |
| 465 KVDVDEYDENKFV  | gi 3121767 sp O15511 A NA                |
| 466 SFKEGTYKPIGFV  | gi 12643888 sp Q9UI46 I NA               |
| 467 YIPEEYWGFEFV   | gi 77416869 sp Q99712 I NA               |

|                    |                                            |
|--------------------|--------------------------------------------|
| 468 FHPKTSYNSCGGV  | gi 6685159 gb AAF2382 NA                   |
| 469 LDSKLNKPPPQK   | gi 1707893 sp P52566 G [LDSKLNKPPPQK Y 24  |
| 470 GSPGMIYSTRYGS  | gi 18202496 sp Q13303 I [GSPGMIYSTRYGS Y 2 |
| 471 TTGHLYKCGGID   | gi 150182807 emb CAOC [TTGHLYKCGGID Y 29   |
| 472 HRPSRQYATLDVY  | gi 119573478 gb EAW53 NA                   |
| 473 TGKPPQYIAVHVV  | gi 1170955 sp P14174 M NA                  |
| 474 SCQNLGYTAASPQ  | gi 143811460 sp Q9NP3 [SCQNLGYTAASPQ Y 3   |
| 475 FHEGDAYVVKWKF  | gi 57013034 sp O95425 NA                   |
| 476 KDSETSYAVDGLF  | gi 55976713 sp Q765I0 L NA                 |
| 477 TKRDIYYTDSQLF  | gi 7674367 sp Q9Y5K1 S NA                  |
| 478 GLSTVGYDEMNDH  | gi 119611661 gb EAW91 NA                   |
| 479 AYFSDKYTCPCNF  | gi 119614031 gb EAW93 NA                   |
| 480 HTLEEIYSWIDNF  | gi 38257690 sp Q8WXQ NA                    |
| 481 LYWKSIIYISMTGH | gi 11467315 ref NP_043 NA                  |
| 482 VTPAEPYARVLFH  | gi 121940967 sp Q24JP NA                   |
| 483 GNDCDLYAHHSTA  | gi 416926 sp P32249 EB NA                  |
| 484 FFDGDCYIILAIH  | gi 138529 sp P09327 VIL NA                 |
| 485 <<Marker>>     | control_spot NA                            |
| 486 TSIEEGYERSFIH  | gi 125950212 sp Q8NA5 NA                   |
| 487 KVSFPKYRINKLH  | gi 4206388 gb AAD1162 NA                   |
| 488 YGDMDIYITASGI  | gi 74750586 sp Q86Z14 NA                   |
| 489 LLESTLYESSVVP  | gi 62901470 sp Q9HBA0 NA                   |
| 490 VCNEHRYGYMNVP  | gi 119608194 gb EAW87 NA                   |
| 491 KKLGPDYVDLFI   | gi 74744643 sp Q5T2L2 NA                   |
| 492 VKDMVEYKDRCMA  | gi 1168366 sp P43652 AI NA                 |
| 493 KQYKDKYLAKHNA  | gi 145559462 sp O14936 NA                  |
| 494 MTEKLGKNSDVI   | gi 9973393 sp P57058 HI NA                 |
| 495 VRSKWEYDESHVI  | gi 29840801 sp Q9Y6J8 NA                   |
| 496 GHEFDLYENKDYI  | gi 123116 sp P14210 HG NA                  |
| 497 LTHPPLYESVTWI  | gi 115449 sp P00915 CA NA                  |
| 498 PSYEDLYTQNVVI  | gi 116242812 sp P29083 NA                  |
| 499 GWSEDSYYEALAK  | gi 74761958 sp Q9UHR5 NA                   |
| 500 QDNEWNYTRAGQA  | gi 20978536 sp Q9GZY0 NA                   |
| 501 LKSALAYVDGKCC  | gi 2494289 sp Q99435 N NA                  |
| 502 TVMEGFYVIFDRA  | gi 6685260 sp Q9Y5Z0 B NA                  |
| 503 ARPCPDYCRNVLK  | gi 462190 sp P35052 GP NA                  |
| 504 STVFEEYEKIANK  | gi 126302519 sp P13928 NA                  |
| 505 EIHKIFYDNLCPK  | gi 5915668 sp Q12979 A NA                  |
| 506 <<Marker>>     | control_spot NA                            |
| 507 SISRSEYLNISEL  | gi 150036903 emb CAI1 NA                   |
| 508 GSEDGLYECHHCA  | gi 547700 sp Q01101 IN NA                  |
| 509 RFREVPYAYIREG  | gi 60392771 sp P50281 NA                   |
| 510 CRDPPDYWTIHGL  | gi 20139363 sp O00584 I NA                 |
| 511 ENSELKYSQDGL   | gi 2494684 sp Q92908 G NA                  |
| 512 HFDMTTYLASGGL  | gi 148744318 gb AAI426 NA                  |
| 513 KVAMDDYLKNVML  | gi 74708170 sp Q5S007 NA                   |
| 514 NSSEVPYSHFGNL  | gi 6225804 sp P56715 R NA                  |
| 515 LWSNTAYPSLKPL  | gi 119619961 gb EAW99 NA                   |
| 516 IYENHLYVYPLQL  | gi 24212635 sp Q9BZ29 NA                   |
| 517 FYHMDLYDSEDRL  | gi 119582843 gb EAW62 NA                   |
| 518 CWEDHGYSLVNRL  | gi 13633953 sp Q9Y6P5 NA                   |
| 519 APKGGKYDDVTLM  | gi 46395948 sp Q96PE1 NA                   |

|     |               |                         |                      |
|-----|---------------|-------------------------|----------------------|
| 520 | DYFEEIYVVTELM | gj 50400798 sp Q9UBE8   | NA                   |
| 521 | AAANPGYPFHPLM | gj 129215 sp P04001 OP  | NA                   |
| 522 | NVLMEKYHVENDE | gj 118740 sp P11807 DN  | NA                   |
| 523 | AVENPEYLTPQGG | gj 119533 sp P04626 ER  | [AVENPEYLTPQGG Y 1   |
| 524 | PGSAAPYLKTKFI | gj 48429227 sp P40763   | PGSAAPYLKTKFI Y 70   |
| 525 | VYAADYYKLLGNS | gj 90110767 sp Q01974 I | NA                   |
| 526 | VYSTDYRVGGHT  | gj 2497560 sp Q16620 N  | [VYSTDYRVGGHT Y 7    |
| 527 | <<Marker>>    | contol_spot             | NA                   |
| 528 | YFKGIVYAVSSDR | gj 6226810 sp O43602 D  | [YFKGIVYAVSSDR Y 11  |
| 529 | YIDPHTYEDPNQA | gj 1706628 sp P54756 EI | NA                   |
| 530 | YVDPFTYEDPNQA | gj 1711371 sp P54764 EI | [YVDPFTYEDPNQA Y 6   |
| 531 | YVLDDEYVSSFGA | gj 116242835 sp P42681  | [YVLDDEYVSSFGA Y 4   |
| 532 | IIGEGTYGQVYKA | gj 66774048 sp Q14004   | NA                   |
| 533 | ANSVASYENEGAS | gj 14194891 sp O43561 I | NA                   |
| 534 | IYKDPDYVRKGDA | gj 9087218 sp P35968 V  | [IYKDPDYVRKGDA Y 10  |
| 535 | IYNGDYRQGRIA  | gj 48429194 sp P30530   | NA                   |
| 536 | IYSTDYRVGGRT  | gj 94730402 sp P04629 I | [IYSTDYRVGGRT Y 68   |
| 537 | KKSLTIYAQVQKP | gj 9297047 sp Q13291 S  | [KKSLTIYAQVQKP Y 28  |
| 538 | MYDKEYYSVHNKT | gj 125484 sp P08581 ME  | [MYDKEYYSVHNKT Y 1:  |
| 539 | EINGNNYVYIDPT | gj 125472 sp P10721 KIT | [EINGNNYVYIDPT Y 567 |
| 540 | IKNDSNYVVKGNA | gj 125472 sp P10721 KIT | [IKNDSNYVVKGNA Y 82  |
| 541 | FERASEYQLNDSA | gj 121032 sp P11488 GN  | NA                   |
| 542 | EAPTTAYKKTTP  | gj 123557 sp P14317 HC  | [EAPTTAYKKTTP Y 222  |
| 543 | EVHKSGYLSSERL | gj 125987826 sp P15311  | [EVHKSGYLSSERL Y 14  |
| 544 | TLNEESYKDSTLI | gj 1345590 sp P31946 1  | NA                   |
| 545 | GGADTDYADGSED | gj 112927 sp P05067 A4  | NA                   |
| 546 | GYENPTYKFFEQM | gj 112927 sp P05067 A4  | NA                   |
| 547 | PDTFPDYGDVLR  | gj 24636785 sp Q9UER7   | NA                   |
| 548 | <<Marker>>    | contol_spot             | NA                   |
| 549 | KKPKLLYCSNGGH | gj 122737 sp P05230 FG  | NA                   |
| 550 | GPDNLPYVQILKT | gj 120046 sp P11362 FG  | [GPDNLPYVQILKT Y 30  |
| 551 | GEEHVYSFQPNKQ | gj 27735219 sp P49023 F | [GEEHVYSFQPNKQ Y 1   |
| 552 | YSEEEKYAFVNW  | gj 2506254 sp P13797 PI | NA                   |
| 553 | VVYENAYGQFIGP | gj 50403780 sp Q16881   | [VVYENAYGQFIGP Y 13  |
| 554 | ARASGNATVISH  | gj 51702823 sp P62917 F | [ARASGNATVISH Y 13   |
| 555 | ENGSKGYAFVHFE | gj 12229875 sp Q13310 I | NA                   |
| 556 | GYDDNDYDVIK   | gj 3219996 sp Q13627 D  | [GYDDNDYDVIK Y 14    |
| 557 | STLIRHYLIHTGE | gj 97219074 sp Q7Z398   | NA                   |
| 558 | PSRQDVYGPQPQV | gj 14916543 sp O60716   | [PSRQDVYGPQPQV Y 2   |
| 559 | ENDDDAYLNSPWA | gj 10719917 sp P57076   | [ENDDDAYLNSPWA Y 2   |
| 560 | QIIQEIYSQIQSK | gj 1729976 sp P29401 T  | [QIIQEIYSQIQSK Y 275 |
| 561 | RFHPEPYGLEDDQ | gj 14916543 sp O60716   | [RFHPEPYGLEDDQ Y 2   |
| 562 | KSFIKDYPVVSI  | gj 119339 sp P06733 EN  | [KSFIKDYPVVSI Y 287  |
| 563 | ALEDFVYKIFGPG | gj 119629451 gb EAX09   | NA                   |
| 564 | TATEGQYQQQP   | gj 125480 sp P07948 LY  | [TATEGQYQQQP Y 508   |
| 565 | PEEDLEYFECNSV | gj 59800391 sp O75410   | [PEEDLEYFECNSV Y 5   |
| 566 | MEDSTYYKASKGK | gj 3183518 sp Q05397 F  | [MEDSTYYKASKGK Y 6   |
| 567 | VWLLQQYSGMTHE | gj 20455239 sp Q9UGR2   | [VWLLQQYSGMTHE Y     |
| 568 | NEKCHDYTTTEFL | gj 134048493 sp P17858  | NA                   |
| 569 | <<Marker>>    | contol_spot             | NA                   |
| 570 | VVYENAYGQFIGP | gj 50403780 sp Q16881   | [VVYENAYGQFIGP Y 13  |
| 571 | NNASTDYDLPDKS | gj 14250148 gb AAH084   | NA                   |

|     |                |                                            |
|-----|----------------|--------------------------------------------|
| 572 | PSCKALYDFEPEN  | gi 12643797 sp Q99961 P PSCKALYDFEPEN Y 31 |
| 573 | LEDDAIYSVHVPA  | gi 45645212 sp Q9Y2X7 L LEDDAIYSVHVPA Y 54 |
| 574 | GQEAPIYELTSQF  | gi 2493531 sp Q14790 C GQEAPIYELTSQF Y 33  |
| 575 | LNGDVDYFGQQFD  | gi 145559465 sp P98082 NA                  |
| 576 | EPWSNGYIDISFS  | gi 1708905 sp P53338 M NA                  |
| 577 | MTNRDFYSSNNNK  | gi 134937 sp P13574 ST NA                  |
| 578 | SLDENRYIKPPQS  | gi 731873 sp P40466 FK NA                  |
| 579 | TAAQEEYLDKLLA  | gi 731945 sp P39529 YJ NA                  |
| 580 | YETDEGYAEDDDE  | gi 1173439 sp P46954 SI NA                 |
| 581 | ISREYSYERFRNQ  | gi 1352985 sp P47043 Z NA                  |
| 582 | GFKPENYTNNSVN  | gi 1169823 sp P04386 G NA                  |
| 583 | DDAKPCYKSAPIY  | gi 1169136 sp P41817 C NA                  |
| 584 | NNDNSNYTQSPSN  | gi 3024551 sp Q12224 R NA                  |
| 585 | PYEENEYSASNYR  | gi 41016991 sp Q03063 I NA                 |
| 586 | LLGEGAYAKVQGA  | gi 30316115 sp Q9BUB5 NA                   |
| 587 | QADDTYYFDTEFT  | gi 148229469 ref NP_00 NA                  |
| 588 | CRSDSFYSSSASM  | gi 143811403 sp P28358 NA                  |
| 589 | EGDSL DYKDVIPM | gi 146345441 sp P20702 NA                  |
| 590 | <<Marker>>     | contol_spot NA                             |
| 591 | KSLEEMYVFLPM   | gi 113426784 ref XP_001 NA                 |
| 592 | QELMEKYEELKRM  | gi 56748851 sp Q96MT8 NA                   |
| 593 | SSGEGLYTNGSPM  | gi 109939729 sp Q9UIF9 NA                  |
| 594 | ACSRPAYTKKDTM  | gi 143458429 sp Q9P2F NA                   |
| 595 | DKKDFTYDQVAFN  | gi 267050 sp P14410 SU NA                  |
| 596 | EYYKHL YANKLEN | gi 126295 sp P08547 LIN NA                 |
| 597 | KHLNDIYEEEPFN  | gi 67477352 sp O43929 C NA                 |
| 598 | LLEVELYADYREN  | gi 62899884 sp Q96G97 NA                   |
| 599 | PSAEEAYNFFTFN  | gi 119613139 gb EAW92 NA                   |
| 600 | WTSDVQYQVSPFN  | gi 62511241 sp P30038 Z NA                 |
| 601 | NCTHDL YMIMREC | gi 120050 sp P22607 FG NCTHDL YMIMREC Y 7  |
| 602 | NLYSGDY YRIQGR | gi 2497564 sp Q16832 D NLYSGDY YRIQGR Y 7  |
| 603 | KPDEESYCKQWLN  | gi 59803021 sp P32019 I NA                 |
| 604 | RCCEEKYIPFVLN  | gi 91207975 sp O75445 I NA                 |
| 605 | VHEEKYIHIIFLN  | gi 119597122 gb EAW76 NA                   |
| 606 | ARDLEQYVNNVNN  | gi 73620979 sp Q8TAB3 NA                   |
| 607 | LVSEFPYIEAEVN  | gi 90185248 sp P43304 C NA                 |
| 608 | VSCAEGYTFEGVN  | gi 148886654 ref NP_69 NA                  |
| 609 | CFWRDNYLNNPQQ  | gi 122889116 emb CA11 NA                   |
| 610 | GGFAPDYDYGQQ   | gi 38258405 sp O60478 C NA                 |
| 611 | LASNQDYKHPLPQ  | gi 115502505 sp Q86VF NA                   |
| 612 | QICFDLYESASQQ  | gi 51704332 sp Q99460 I NA                 |
| 613 | HLGWPRYTDYGWQ  | gi 20071613 gb AAH269 NA                   |
| 614 | LEGYEIYVTPGVQ  | gi 68565390 sp Q14676 I NA                 |
| 615 | PARCEEYDYYGWQ  | gi 150421670 sp Q5T4F NA                   |
| 616 | AQGNENYAGIAAR  | gi 81175200 sp Q9Y490 A AQGNENYAGIAAR Y 1  |
| 617 | EPVDES YAPNYYQ | gi 114152782 sp Q9BXF NA                   |
| 618 | IVRTEYYKEL AAR | gi 119611595 gb EAW91 NA                   |
| 619 | GLSADPYVYNWTA  | gi 61252504 sp Q14956 C NA                 |
| 620 | ILQKKTYVTLGVA  | gi 1352532 sp P48067 S NA                  |
| 621 | QDDKDFYLRGAVA  | gi 29839561 sp Q8NF91 NA                   |
| 622 | WEELELYKDG GVA | gi 59803123 sp Q9Y2G5 NA                   |
| 623 | DIICPHYEDH SVA | gi 73920206 sp P20827 E NA                 |

|     |                |                                              |
|-----|----------------|----------------------------------------------|
| 624 | TASKHAYVPNSAP  | gi 74747078 sp Q5VUB5 NA                     |
| 625 | AMFEEAYSNYCKR  | gi 27923741 sp Q8NI60  NA                    |
| 626 | FFMDPIYSRVEKR  | gi 24418633 sp Q9HAZ2 NA                     |
| 627 | IKEAVRYKSSGKR  | gi 143811412 sp Q1284C NA                    |
| 628 | EASGGRYVSR AVL | gi 55770868 ref NP_064 NA                    |
| 629 | TGVEPCYGDKDKR  | gi 114722 sp P27037 AV NA                    |
| 630 | EAGGENYKDADEC  | gi 20138588 sp Q14766 I NA                   |
| 631 | ITCEVSYCDRCLR  | gi 38605085 sp Q9UJV3  NA                    |
| 632 | KTSNNTYLCLAVL  | gi 146325015 sp Q9Y6Y( NA                    |
| 633 | SVEKECYLKPELR  | gi 113423494 ref XP_001 NA                   |
| 634 | LLSDVAYRDP SLR | gi 38258919 sp P42356 F NA                   |
| 635 | ADPTEGYTNHFNR  | gi 11640572 gb AAG392 NA                     |
| 636 | MRNTPEYEELCPR  | gi 544279 sp P35555 FBI NA                   |
| 637 | LPPTDRYGRPPYR  | gi 50401129 sp Q96NW7 NA                     |
| 638 | VFQKTHYPDVYVR  | gi 90111820 sp Q15699 ( NA                   |
| 639 | DPGATKYTDKDNG  | gi 90103520 sp Q9P2K3  NA                    |
| 640 | SFRESFYRSM AVL | gi 118730278 ref ZP_01 NA                    |
| 641 | IGPKFGYDEIDNG  | gi 126302511 sp Q15067 NA                    |
| 642 | TFFDKKYSNMSTL  | gi 74743104 sp Q5QGSC NA                     |
| 643 | LHYNGHYTEPYAS  | gi 2493260 sp Q16825 P NA                    |
| 644 | RECKEAYHEGEC S | gi 116242725 sp O6026C NA                    |
| 645 | AARLNGYVDAGDS  | gi 113041 sp P22966 AC NA                    |
| 646 | FKCETEYAFSLDS  | gi 119606839 gb EAW86 NA                     |
| 647 | LGMEGPYEVLKDS  | gi 84029384 sp Q9NWQ: [LGMEGPYEVLKDS Y 1     |
| 648 | PSQDSL YSDPLDS | gi 17366642 sp Q99704 I [PSQDSL YSDPLDS Y 31 |
| 649 | KGYYSPYSVSGSG  | gi 134044255 sp Q15149 [KGYYSPYSVSGSG Y 4    |
| 650 | SSDDVRYVNAFKF  | gi 143811474 sp P17948 [SSDDVRYVNAFKF Y 1    |
| 651 | RHVKDLYLIPLSA  | gi 116241332 sp Q9BTC NA                     |
| 652 | KLSGEAYGFVARI  | gi 401413 sp P04275 VW NA                    |
| 653 | KKLAELYGEIESE  | gi 3023435 sp Q13634 C NA                    |
| 654 | PNEDCLYLN VYVP | gi 31076855 sp Q9NZ94  NA                    |
| 655 | DIHVGDYIIPKNT  | gi 3182968 sp O15528 C NA                    |
| 656 | PPERIIYANPCKQ  | gi 118377 sp P11926 DC NA                    |
| 657 | DLRTAAYVNAIEK  | gi 118541 sp P00367 DH NA                    |
| 658 | AAFQFSYTAVFGA  | gi 13431529 sp Q9Y256  NA                    |
| 659 | AVCFFSYLRVSRD  | gi 121137 sp P21217 FU NA                    |
| 660 | LKQIPRYLIPCYF  | gi 116242491 sp P35573 NA                    |
| 661 | FLMHSVYQPQPSA  | gi 34222653 sp Q9NSY1 NA                     |
| 662 | CKVESIYLNVEAV  | gi 2507178 sp P16118 F NA                    |
| 663 | FSSSEIYGLIKTG  | gi 12230076 sp Q14410 ( NA                   |
| 664 | VLRKEAYGKPV DI | gi 12643413 sp Q13554 I NA                   |
| 665 | NLLGELYGKAGLN  | gi 1170685 sp P46019 KI NA                   |
| 666 | TLGTAAYMAPEVI  | gi 6685621 sp Q9Y6R4 M NA                    |
| 667 | SQCIHLYTAVLRG  | gi 126302596 sp P08922 NA                    |
| 668 | VHVNATYVNVKCV  | gi 125484 sp P08581 ME [VHVNATYVNVKCV Y 1    |
| 669 | APLCSSYLIPKEI  | gi 1709020 sp P41594 M NA                    |
| 670 | VTWRKYYINVC RP | gi 60416403 sp P11717 M NA                   |
| 671 | GSAIVMYMAPKSR  | gi 85692724 sp Q96R48  NA                    |
| 672 | SFQKSFYINAHIR  | gi 2495042 sp Q99677 P NA                    |
| 673 | LVYVTRYLDNGLC  | gi 92090608 sp P35475 I NA                   |
| 674 | PTKCDCYTASPKC  | gi 145559531 sp Q8WW NA                      |
| 675 | SPTNPGYVVPCNC  | gi 6831689 sp O95416 S NA                    |

676 NRNEPEYNISQPG gj|12643957|sp|Q9Y618| NA  
677 SSFCVHYVNLLPG gj|13623347|gb|AAH062| NA  
678 AGSYSSYVQVRGS gj|2497367|sp|Q92562|S NA  
679 LGAEMDYVEDKLS gj|119605300|gb|EAW84 NA  
680 PTQEETYPSNILS gj|62899891|sp|Q9HC77 NA  
681 SEPSIDYLDKLS gj|143458429|sp|Q9P2F| NA  
682 CESCPLYKKLRLS gj|83300977|sp|P42575| NA  
683 MLDKLRVFSQMS gj|13626370|sp|O60941| NA  
684 WPHEGLYEKPSLS gj|14329506|emb|CAC4C NA  
685 RRYFTGYVINGGP gj|61212254|sp|Q9Y5Z6| NA  
686 GDKETYNNIIRS gj|46397621|sp|P98088| NA  
687 CHSTVDYATFYRS gj|116241270|sp|Q8N8U NA  
688 LETEEHYKSRWRS gj|119625598|gb|EAX05 NA  
689 MQKNGGYIWIQSS gj|38604888|sp|Q8IXF0| NA  
690 VWRMEIYLSLGVL gj|146325737|sp|Q658P NA  
691 DPSEFEYLFKDT gj|119612677|gb|EAW92 NA  
692 GMKKLSYIRIADT gj|129951|sp|P07585|PG NA  
693 LRSMSLYLSNKDT gj|85701302|sp|Q96JB2| NA  
694 TFNKCDYDSMGDT gj|119578213|gb|EAW57 NA  
695 EKGEEQYGADGET gj|116242672|sp|Q1468 NA  
696 VCEELTYEEIRD NA  
697 SVDSSLYNLPRSY gj|90180201|sp|Q13480| [SVDSSLYNLPRSY|Y|25  
698 YATEAVYESAEAP gj|2498954|sp|Q14247|S [YATEAVYESAEAP|Y|47  
699 SDGMMDYSGPPSG gj|127624|sp|P15172|MY [SDGMMDYSGPPSG|Y|  
700 EANYHLYGSRMDR gj|60393639|sp|Q13546|I [EANYHLYGSRMDR|Y|3  
701 GPLGPLYASSNPE gj|33112647|sp|P06213|I [GPLGPLYASSNPE|Y|9  
702 NSSSDSYDLHGAQ gj|116024|sp|P06127|CD [NSSSDSYDLHGAQ|Y|4  
703 GQYGEVYEGVWKK gj|85681908|sp|P00519|/ [GQYGEVYEGVWKK|Y|  
704 KGHGGLYQGLSTA gj|23830999|sp|P20963|C [KGHDGLYQGLSTA|Y|1  
705 RWDDLHYRLTDLG gj|13124441|sp|O14939|I NA  
706 SPGHTIYAKVDNE gj|56404432|sp|O14639|/ [SPGHTIYAKVDNE|Y|37  
707 TAGLSTYLYNRQR gj|68067956|sp|P05362|I [TAGLSTYLYNRQR|Y|5  
708 AASKQKYLENYLN gj|13124441|sp|O14939|I NA  
709 RGKSTYYWPRPRR gj|3023873|sp|Q13067|G NA  
710 TPSPKSYENLWFQ gj|729564|sp|Q99062|CS [TPSPKSYENLWFQ|Y|7  
711 FREDEGYIKEEER gj|1345813|sp|P16389|K [FREDEGYIKEEER|Y|13  
712 QDNSGTYGKIWEG gj|547803|sp|Q05655|KP NA  
713 AQEKMVYSLVSVV gj|17366467|sp|Q14643|I [AQEKMVYSLVSVV|Y|3  
714 ENQLQLYQEKCNK gj|143811440|sp|P16885 [ENQLQLYQEKCNK|Y|1  
715 KGQRDLYSGLNQR gj|1345708|sp|P07766|C [KGQRDLYSGLNQR|Y|1  
716 LPSSPVYEDAASF gj|2498954|sp|Q14247|S [LPSSPVYEDAASF|Y|42  
717 PSFSTIYQELQSI gj|115502390|sp|P07332 [PSFSTIYQELQSI|Y|81  
718 RPPGLECYNPSH gj|120046|sp|P11362|FG [RPPGLECYNPSH|Y|5  
719 TSSESIYRPGSS gj|56404432|sp|O14639|/ [TSSESIYRPGSS|Y|35  
720 CLNPLVYVIVGKR gj|2506481|sp|P30411|BI [CLNPLVYVIVGKR|Y|33  
721 TANVVYVYGENVVV gj|2499575|sp|Q15139|K [TANVVYVYGENVVV|Y|5  
722 AAQDEFYRSGWAL gj|729887|sp|P41240|CS [AAQDEFYRSGWAL|Y|1  
723 DFREYEYDLKWEF gj|544320|sp|P36888|FL [DFREYEYDLKWEF|Y|5  
724 EFMCKVYSDPQPH gj|120046|sp|P11362|FG [EFMCKVYSDPQPH|Y|2  
725 KSGFEGYVELPPI gj|1345923|sp|P32927|IL [KSGFEGYVELPPI|Y|7  
726 LQQVGDYCFPLPGL gj|1345923|sp|P32927|IL [LQQVGDYCFPLPGL|Y|8  
727 EDDLVPYLARPGT gj|50417352|gb|AAH770| NA



|     |                |                                            |
|-----|----------------|--------------------------------------------|
| 728 | DFTSPYDHDHSLK  | gi 37999356 sp O75995 ; NA                 |
| 729 | IDSVPTYKWKQRQV | gi 119594688 gb EAW74 NA                   |
| 730 | SPTSPTYSPTTPK  | gi 133326 sp P24928 RP NA                  |
| 731 | TSSGQRYFLNHID  | gi 1175423 sp P46937 Y; NA                 |
| 732 | DGSVIDYELIDQD  | gi 113950 sp P07355 AN NA                  |
| 733 | LKIDEDYKEKTVI  | gi 62903511 sp Q07617 ; NA                 |
| 734 | IILVDDYSNDPED  | gi 51315838 sp Q10471 ; NA                 |
| 735 | SKLKFYYNPNFKR  | gi 27805481 sp Q96LI6 ; NA                 |
| 736 | LGFRPEYSASQLK  | gi 130781 sp P09874 PA NA                  |
| 737 | LSKLFYYNPNFK   | gi 27805481 sp Q96LI6 ; NA                 |
| 738 | LEKHSWYHGPVSR  | gi 1168268 sp P42684 AI NA                 |
| 739 | EPVGTTYQKTDAA  | gi 2498313 sp Q16643 D NA                  |
| 740 | DGQYDPYTDSRFR  | gi 119372014 sp Q8IVL1 NA                  |
| 741 | EEEDDDYPGSYSP  | gi 23813907 sp Q9NQGE; NA                  |
| 742 | SPERAHYTHSDYQ  | gi 20139105 sp Q99959 I NA                 |
| 743 | VPQQPTYVQALFD  | gi 51702266 sp P62993 ; NA                 |
| 744 | LPNDQLYQPLKDR  | gi 115993 sp P09693 CD [LPNDQLYQPLKDR Y 1{ |
| 745 | RTSIDAYDNFDNI  | gi 1705916 sp Q00610 C NA                  |
| 746 | SVSTAVYKRFTM   | gi 38503351 sp Q8N1M1 NA                   |
| 747 | LTYLDGYDREDQE  | gi 26390818 sp Q92688 ; NA                 |
| 748 | ITLDNAYMEKCDE  | gi 20178296 sp P14618 ; NA                 |
| 749 | AEWKQKYEETQAE  | gi 13431724 sp Q9Y623 ; NA                 |
| 750 | YADSYYYEDGGMK  | gi 73619722 sp Q8IVM0 ; NA                 |
| 751 | AQWRTKYETDAIQ  | gi 148342499 gb ABQ59; NA                  |
| 752 | REELTRYLFLVQL  | gi 14916925 sp Q9HCM4 NA                   |
| 753 | DYYDRMYSYPARV  | gi 108935845 sp P07910 NA                  |
| 754 | SSWEAPYSRSKLR  | gi 73622105 sp Q5BKZ1 ; NA                 |
| 755 | KATDAAYQARQAV  | gi 59797888 sp Q9H0E9 ; NA                 |
| 756 | DLLREQYEEEQEA  | gi 13431724 sp Q9Y623 ; NA                 |
| 757 | DRKIVAYGKEGHM  | gi 148744366 gb AAI426; NA                 |
| 758 | DSRPGGYGYGYGR  | gi 1710620 sp P98179 R; NA                 |
| 759 | IPLQETYDVCEQP  | gi 2495730 sp Q92558 W [IPLQETYDVCEQP Y 12 |
| 760 | DSWEQNYSPGEGF  | gi 30913162 sp Q8TEWC; NA                  |
| 761 | RPDRQAYEPPPPP  | gi 20981729 sp Q15654 ; NA                 |
| 762 | HSENYDTMSSPL   | gi 74725312 sp Q9NTI5 ; NA                 |
| 763 | TGNDQAYRRRGRQ  | gi 58257690 dbj BAA959 NA                  |
| 764 | TIQDGIYTAHPVR  | gi 119584977 gb EAW64 NA                   |
| 765 | KEQLHKYVRELEQ  | gi 74725006 sp Q9GZM8 NA                   |
| 766 | CIRHILYNEQRLV  | gi 1174462 sp P42229 S; NA                 |
| 767 | EKIKAKYPDYEVT  | gi 25008934 sp Q9NRX4 NA                   |
| 768 | HMMDALYAQVKKP  | gi 30913162 sp Q8TEWC [HMMDALYAQVKKP Y 1   |
| 769 | TGKSGAYLIPLLE  | gi 116241327 sp P26196 NA                  |
| 770 | NNLAEIYGRIERE  | gi 18203332 sp Q9NZN3 NA                   |
| 771 | NCFLSSYPNPVAH  | gi 59802987 sp O75153 I NA                 |
| 772 | FCGTIEYMAPEII  | gi 37999483 sp O75676 I NA                 |
| 773 | EIDEETYEEIYKS  | gi 61227725 sp P62310 L NA                 |
| 774 | GQAAKDYLNLHIM  | gi 3914118 sp P56597 NI NA                 |
| 775 | GFTGLTYANPQGC  | gi 2497600 sp Q13751 L; NA                 |
| 776 | FVPSNNYIIPNKS  | gi 48429157 sp P61812 ; NA                 |
| 777 | FSEDDDYIDIVDS  | gi 123055 sp P05546 HE NA                  |
| 778 | PPAQQPYQPQPVV  | gi 1168430 sp Q99217 A NA                  |
| 779 | YVPRTYANPAVV   | gi 1705606 sp P07498 C; NA                 |

|     |               |                         |    |
|-----|---------------|-------------------------|----|
| 780 | VTTDTAYLRVVAH | gi 8134694 sp O95754 S  | NA |
| 781 | SKSGLKYINVGDL | gi 6831735 sp Q9Y3D8 K  | NA |
| 782 | KLKPENYENVQSL | gi 68837635 sp O15442 I | NA |
| 783 | TAAMQKYPNPMNP | gi 26392626 sp Q9Y3B1   | NA |
| 784 | PDPTTVYVDMRAL | gi 32700084 sp Q14689 I | NA |
| 785 | REIQGGYMDMYRR | gi 145559499 sp O15049  | NA |
| 786 | KQLQLSYVEMYQR | gi 6136547 sp O60299 K  | NA |
| 787 | EALDKVYEEIEKD | gi 8134317 sp O43520 A  | NA |
| 788 | QRTPENYPNAGLT | gi 114062 sp P08519 AP  | NA |
| 789 | PYLMEAYGPIPAY | gi 12585187 sp P82251 E | NA |
| 790 | SIFFIYIIIVAF  | gi 116241275 sp Q01668  | NA |
| 791 | SSYYVFYIYVGVA | gi 147744553 sp P13569  | NA |
| 792 | IFFFVSYIIISFL | gi 119631737 gb EAX11   | NA |
| 793 | SRDYNPYNYSDSI | gi 77416392 sp O75122 C | NA |
| 794 | FLGNLPYDVTEES | gi 124219 sp P23588 IF4 | NA |
| 795 | GLARDIYKNPDYV | gi 143811474 sp P17948  | NA |
| 796 | SRASISYGSNMRP | gi 71151982 sp Q7Z406 I | NA |
| 797 | AILDHTYSKHVKS | gi 23396462 sp O94805   | NA |
| 798 | GVAKETYKSLPKL | gi 17369704 sp Q9ULB1   | NA |
| 799 | G1:17         | contol_spot             | NA |
| 800 | G5:17         | contol_spot             | NA |
| 801 | LVGAPTYDDVSKV | gi 126302583 sp P80108  | NA |
| 802 | YPHKTLYVNRKV  | gi 74760061 sp Q8NA75   | NA |
| 803 | PPDWTDYNDFELQ | gi 126469 sp P23467 PT  | NA |
| 804 | QDELHDYINHLLQ | gi 1170685 sp P46019 KI | NA |
| 805 | TKKYDGYTSCPLV | gi 27151704 sp Q9Y6N5   | NA |
| 806 | HFFAPEYGEVTNV | gi 74761962 sp Q9UHY1   | NA |
| 807 | YVPRTYANPAVV  | gi 1705606 sp P07498 C  | NA |
| 808 | FMIQEEYVDTVSG | gi 18201966 sp O15399 I | NA |
| 809 | DISWDPYQPNRVV | gi 119620540 gb EAX00   | NA |
| 810 | LYLMEDYVGSPVV | gi 128581 sp P20783 NT  | NA |
| 811 | AWNDQGYEHTAED | gi 73621409 sp Q8WZA1   | NA |
| 812 | LKKEPLYVGVDDD | gi 20532388 sp Q9NVP1   | NA |
| 813 | KEFKNDYKLSMQ  | gi 6686048 sp Q9Y210 T  | NA |
| 814 | ERFEGPYTDFTPW | gi 146328628 sp Q99543  | NA |
| 815 | LATETVYVDDASW | gi 118572728 sp Q12789  | NA |
| 816 | RKSFDEYWAHTRW | gi 31652312 emb CAD92   | NA |
| 817 | TLSNEEYMYAYRW | gi 1350587 sp P48382 R  | NA |
| 818 | WLSCQEYEEGPW  | gi 10720024 sp Q9UBN7   | NA |
| 819 | YDDMDYFPGPPP  | gi 62089074 dbj BAD929  | NA |
| 820 | FESEVRYQCNPY  | gi 148886654 ref NP_69  | NA |
| 821 | LEQMPDYSIFRGY | gi 145559531 sp Q8WW    | NA |
| 822 | NGSGAPYVYHAIY | gi 74719655 sp Q9NZI7 I | NA |
| 823 | SDYELKYCFVDKY | gi 74759693 sp Q8IY67 F | NA |
| 824 | VVLENYKDFTIY  | gi 38258809 sp Q8TAA9   | NA |
| 825 | ESDGDEYAMASSA | gi 74762140 sp Q15020   | NA |
| 826 | ADMEAKYEEILHD | gi 119587879 gb EAW67   | NA |
| 827 | DVFPDSYVSTWHD | gi 45477325 sp Q96K62   | NA |
| 828 | KNEKGQYISPFHD | gi 8247940 sp Q15181 IF | NA |
| 829 | AVRENRYIVLAKD | gi 20532409 sp P43686 F | NA |
| 830 | KKSKLRYTEEGKD | gi 1706179 sp P49711 C  | NA |
| 831 | ELEGDTYDRVLVD | gi 152125805 sp Q96CB   | NA |

|     |               |                                             |
|-----|---------------|---------------------------------------------|
| 832 | PAPDVDYDSATSA | gi 21749720 dbj BAC036 NA                   |
| 833 | YMKDVCYVDGKVD | gi 74719591 sp Q9NYV6 NA                    |
| 834 | PTQEDLYLHVNSA | gi 23396998 sp Q9BRP0 NA                    |
| 835 | WDTEEAYIGSMRP | gi 76800646 sp Q9Y4K1  NA                   |
| 836 | SLRMGAYVFIGVG | gi 131775 sp P27701 CD NA                   |
| 837 | VELGPYYVEIGHE | gi 23821932 sp Q8TDX9 NA                    |
| 838 | PGEDDKYNIGIIE | gi 119628684 gb EAX08z NA                   |
| 839 | ELPQDVYTIKALE | gi 7387495 sp Q14738 2 NA                   |
| 840 | ILFCSTYRMALE  | gi 2829667 sp P78333 G NA                   |
| 841 | TIDAEAYAIGKKE | gi 74762440 sp Q7Z6E9  NA                   |
| 842 | CISNDFYSHMPVG | gi 154350236 ref NP_06z NA                  |
| 843 | <<Marker>>    | contol_spot NA                              |
| 844 | GEHMDVYVPVACH | gi 152031705 sp Q8NHU NA                    |
| 845 | GTEKPKYLQHSCH | gi 119584213 gb EAW63 NA                    |
| 846 | TNNGNMYTSSLYG | gi 61252474 sp P54869 f NA                  |
| 847 | YFPDWQYINPVAH | gi 2497687 sp Q13093 P NA                   |
| 848 | LPVDESIVLPQSE | gi 119621882 gb EAX01z NA                   |
| 849 | VKAAREYEDPPSE | gi 123231843 emb CAM1 NA                    |
| 850 | DMSKYLADSSKT  | gi 146286138 sp Q8NDI1 NA                   |
| 851 | HLEAGGYHSLALT | gi 30580361 sp Q96Q42  NA                   |
| 852 | SGAMENYHDLHKT | gi 112421039 ref NP_03z NA                  |
| 853 | DASKHKYTSEDLT | gi 126302515 sp P51826 NA                   |
| 854 | IPRENAYLTKDLT | gi 37537898 sp Q96M32  NA                   |
| 855 | PDSPPGYEECVGP | gi 119603417 gb EAW83 NA                    |
| 856 | DGFEGFYKSTYRT | gi 119616488 gb EAW96 NA                    |
| 857 | NIFMTLYGINGST | gi 119621884 gb EAX01z NA                   |
| 858 | FPESEGYSYETST | gi 1170875 sp P46821 M NA                   |
| 859 | TPYMTKYERARVL | gi 47117761 sp P61218 f NA                  |
| 860 | ASTEDHYLSIVTT | gi 119497911 ref XP_001 NA                  |
| 861 | GNGSPQYWEMGVT | gi 12006045 gb AAG447z NA                   |
| 862 | RFAVDEYSMDMAV | gi 49036087 sp Q86VI3 f NA                  |
| 863 | YNEKVMYVEGTAV | gi 33338076 gb AAQ136f NA                   |
| 864 | <<Marker>>    | contol_spot NA                              |
| 865 | ICFEAKYVGSLDV | gi 57012635 sp O75052 f NA                  |
| 866 | PNVEESYLPSPDV | gi 148880116 sp Q9UPR NA                    |
| 867 | EFRNFSYVSPELQ | gi 1346393 sp P24723 KI NA                  |
| 868 | FYESLKYARVKEV | gi 13878337 sp Q13315 f NA                  |
| 869 | LHNKGVYVRVGLQ | gi 1708624 sp P52824 Df NA                  |
| 870 | HEPKGYANFCSG  | gi 135684 sp P10600 TG NA                   |
| 871 | KGDEEEYWNSSKF | gi 41016926 sp Q9H9C1 [KGDEEEYWNSSKF Y 1    |
| 872 | CDYCDTYLTHDSP | gi 134093 sp P09234 RU [CDYCDTYLTHDSP Y 1z  |
| 873 | DSEGHLYTVPIRE | gi 13637934 sp Q03135 f [DSEGHLYTVPIRE Y 14 |
| 874 | GTYGVVYKAKNRE | gi 231726 sp Q00526 CD NA                   |
| 875 | DCETDGYLSSSGF | gi 41688789 sp Q96J92 f NA                  |
| 876 | DALKEKYDSAAAM | gi 731157 sp P41221 Wf NA                   |
| 877 | RRKKEPYGASPGF | gi 14589937 ref NP_116f NA                  |
| 878 | DKNSEVYQEVQAM | gi 74735811 sp Q52LJ0 f NA                  |
| 879 | GFEKYSYEIIQKF | gi 113414409 ref XP_497 NA                  |
| 880 | LFWSLKYVIMAKF | gi 113418228 ref XP_001 NA                  |
| 881 | MGSESTYSECETF | gi 14424221 sp O75154 f NA                  |
| 882 | GYSEVIYGRKRWF | gi 67848436 gb AAAY822f NA                  |
| 883 | RISEDGYPWDSVF | gi 6225373 sp Q99518 f NA                   |

|                    |                                              |
|--------------------|----------------------------------------------|
| 884 WKREPGYTPPGAG  | gi 74751663 sp Q93052 I NA                   |
| 885 <<Marker>>     | contol_spot NA                               |
| 886 EHSTIYEDPQHH   | gi 48428729 sp P61962 I NA                   |
| 887 GEPHPTYDLTGH   | gi 6016293 sp O43365 H NA                    |
| 888 NDSIFEYKDIGEI  | gi 74762200 sp Q5JVG2  NA                    |
| 889 CDPKFHYDNTAGI  | gi 9087218 sp P35968 V( [CDPKFHYDNTAGI Y 12  |
| 890 KQPEPIYSKTEI   | gi 119585900 gb EAW65 NA                     |
| 891 VRYQGPPYVSMFI  | gi 116242831 sp Q8TE2  NA                    |
| 892 EKECFYVVLKGGH  | gi 68566146 sp Q9NQW  NA                     |
| 893 KSKCPSYVGITGI  | gi 20141663 sp O95707 I NA                   |
| 894 RACESCYMSSLRI  | gi 22550298 gb AAN016  NA                    |
| 895 VNEDPEYQWIDRI  | gi 74750574 sp Q86YS7  NA                    |
| 896 FIRSSDYMRHQRI  | gi 74762352 sp Q6P9A3  NA                    |
| 897 EYKEEMYITSDCG  | gi 27151698 sp Q96PQ0 NA                     |
| 898 RQAEAYGASHYP   | gi 24418715 sp Q8WYN  NA                     |
| 899 TGKHEGYVHFGTI  | gi 73620659 sp Q6ZRH7 NA                     |
| 900 VKAMSDYWVVGKK  | gi 67460432 sp O95766  NA                    |
| 901 HVSLGDYEIHDGM  | gi 52082771 sp Q9BZL1  NA                    |
| 902 LQSLEKYTKVKCG  | gi 17368550 sp Q92611 I NA                   |
| 903 FPKDTAYVLLYKK  | gi 38372866 sp Q8NB14  NA                    |
| 904 DIEESKYRQRHLK  | gi 38605067 sp Q9NSB8 NA                     |
| 905 RGSELYAIKILK   | gi 462455 sp P05129 KP NA                    |
| 906 <<Marker>>     | contol_spot NA                               |
| 907 GTSKTLYSTNMAL  | gi 108935980 sp Q52LR  NA                    |
| 908 APSWPKYFSIVAL  | gi 27526556 emb CAC82 NA                     |
| 909 NSDCETYMSADDL  | gi 145559437 sp Q9Y2T  NA                    |
| 910 RECYEAYVIYNFM  | gi 74734475 sp Q9NVA4 NA                     |
| 911 AFTGDAYDAIGEL  | gi 20140146 sp Q96RF0  NA                    |
| 912 GLTDEEYERYREL  | gi 62288846 sp Q76G19  NA                    |
| 913 FSSGHIYVLMGLL  | gi 1710243 gb AAB5021  NA                    |
| 914 PDNATTYVHKGLL  | gi 14285643 sp O94826  NA                    |
| 915 HLDDGEYWSNRRA  | gi 74753022 sp Q9NWH  NA                     |
| 916 RRPEGGYKAVWFG  | gi 45477168 sp Q9HBB8 NA                     |
| 917 QLEDEFYTFVNULL | gi 74748786 sp Q6IE81  NA                    |
| 918 FPGVSEYADFPHM  | gi 119629223 gb EAX08  NA                    |
| 919 DVSNQLYACYAIG  | gi 418175 sp P15313 VA NA                    |
| 920 GEPEFHYYIAGAAG | gi 27805434 sp Q8N436  NA                    |
| 921 GYDTPGYVPGYHG  | gi 17433016 sp P78357  NA                    |
| 922 LQNETSYSRVLHG  | gi 119578878 gb EAW58 NA                     |
| 923 NLYMTLYDEVTHG  | gi 134034056 sp Q8IY85 NA                    |
| 924 SIAEFSYAILTHG  | gi 119581291 gb EAW60 NA                     |
| 925 TPGMKIYIDPFTY  | gi 76803654 sp P29323 E [TPGMKIYIDPFTY Y 604 |
| 926 DDPEAAYTTRGGK  | gi 116241351 sp P29320 [DDPEAAYTTRGGK Y 7    |
| 927 <<Marker>>     | contol_spot NA                               |
| 928 DDPEATYTTSGGK  | gi 125333 sp P29317 EP [DDPEATYTTSGGK Y 7    |
| 929 VHHIDYYKKTSGGK | gi 13432140 sp P22455 F NA                   |
| 930 VIENPQYFRQGHN  | gi 134035335 sp Q16288 [VIENPQYFRQGHN Y 5    |
| 931 VPEGHEYYRVRED  | gi 56405328 sp P29597 I [VPEGHEYYRVRED Y 1   |
| 932 GIHPVRYQPGKYP  | gi 14548196 sp Q9NRQ2 [GIHPVRYQPGKYP Y 8     |
| 933 GMSRDIYSTDYR   | gi 94730402 sp P04629 I [GMSRDIYSTDYR Y 6    |
| 934 ALLGDHYVQLPAT  | gi 585912 sp Q04912 RC [ALLGDHYVQLPAT Y 13   |
| 935 GTDEGIYDVPLL   | gi 8134421 sp O43281 E NA                    |

|                    |                                              |
|--------------------|----------------------------------------------|
| 936 HGECVEYVKSFNI  | gj 3334210 sp O15379 H NA                    |
| 937 IETDKEYYTVKDD  | gj 125060 sp P23458 JA  [IETDKEYYTVKDD Y 10: |
| 938 TDVETTYADFIAS  | gj 48428970 sp P61925 I [TDVETTYADFIAS Y 8 P |
| 939 IYETDYRKGKGK   | gj 33112647 sp P06213 I [IYETDYRKGKGK Y 11   |
| 940 TATEPQYQPGENL  | gj 125870 sp P07947 YE [TATEPQYQPGENL Y 5:   |
| 941 LGGKAAARTSPRL  | gj 121116 sp P06396 GE NA                    |
| 942 ASSGADYPDELQC  | gj 136408 sp P07477 TR [ASSGADYPDELQC Y 1:   |
| 943 YPNDSVYANWMLS  | gj 547807 sp P07949 RE [YPNDSVYANWMLS Y 1    |
| 944 IDEEDTYTMPSTR  | gj 3183518 sp Q05397 F, [IDEEDTYTMPSTR Y 40  |
| 945 EDSARVYENVGLM  | gj 84028248 sp Q06124 I [EDSARVYENVGLM Y 5   |
| 946 DDEMTGYVATRWY  | gj 2499600 sp Q16539 M [DDEMTGYVATRWY Y      |
| 947 IGSTLSYFGLAAV  | gj 3915804 sp Q99572 P, [IGSTLSYFGLAAV Y 34: |
| 948 <<Marker>>     | contol_spot NA                               |
| 949 GILTHLYRDFDKC  | gj 24638065 sp Q9UJ70  NA                    |
| 950 YEPETVYEVAGAG  | gj 45382633 ref NP_9907  [YEPETVYEVAGAG Y 4: |
| 951 SKDINAYNCEEPT  | gj 1718024 sp P30041 PI [SKDINAYNCEEPT Y 89  |
| 952 EQKEVDYSGLRVQ  | gj 119599582 gb EAW79 [EQKEVDYSGLRVQ Y 9     |
| 953 KLAQQYYLVYQEP  | gj 130850 sp P25787 PS, [KLAQQYYLVYQEP Y 9:  |
| 954 LKEALTYDGALLG  | gj 18276665 sp Q15056 I [LKEALTYDGALLG Y 10  |
| 955 ASDPILYRPVAVA  | gj 20178296 sp P14618 I [ASDPILYRPVAVA Y 10: |
| 956 VTTCNDYVALVHP  | gj 3122258 sp P56537 IF NA                   |
| 957 DGYSRHYEDGYPG  | gj 14916543 sp O60716  NA                    |
| 958 GAGKKGKYAVNYP  | gj 2498443 sp Q13547 H NA                    |
| 959 DTLQNDYFAIKQE  | gj 119641 sp P14921 ET, [DTLQNDYFAIKQE Y 22  |
| 960 HSGVKPYECTECG  | gj 85681869 sp Q15935  NA                    |
| 961 LQNGPIYARVIQK  | gj 1169096 sp P46108 C  NA                   |
| 962 QTHQPVYHKIQGD  | gj 12643665 sp O95817 I [QTHQPVYHKIQGD Y 2:  |
| 963 RVKEEGYELPYNP  | gj 17366642 sp Q99704 I [RVKEEGYELPYNP Y 3:  |
| 964 RPDILITYEPFYTS | gj 56404432 sp O14639 , [RPDLITYEPFYTS Y 40: |
| 965 SHEDGDYVEVDIN  | gj 34098604 sp Q8TD16  NA                    |
| 966 QSDDEVYAPGLDI  | gj 2498882 sp Q15459 S [QSDDEVYAPGLDI Y 45   |
| 967 DPDSNPYSLLDNT  | gj 1730139 sp P51114 F, [DPDSNPYSLLDNT Y 5:  |
| 968 GRLNLHYAVVSKR  | gj 1351170 sp P47897 S, [GRLNLHYAVVSKR Y 4:  |
| 969 <<Marker>>     | contol_spot NA                               |
| 970 NSHDPSYFACLK   | gj 116242816 sp Q86TI0 NA                    |
| 971 LEEDVIYDDVPCE  | gj 119615247 gb EAW94 [LEEDVIYDDVPCE Y 13    |
| 972 STFDTPYCRVGLG  | gj 18088311 gb AAH206, [STFDTPYCRVGLG Y 1:   |
| 973 DHLAYRYEVLKII  | gj 150421544 sp O43781 [DHLAYRYEVLKII Y 209  |
| 974 PSSGQIYGSGPQG  | gj 74751663 sp Q93052 I NA                   |
| 975 PIDDEIYEELPEE  | gj 74735515 sp O75563 , [PIDDEIYEELPEE Y 260 |
| 976 PQSMHSYKKNIL   | gj 73921276 sp Q04116  NA                    |
| 977 IFYNNCYKENAFD  | gj 730855 sp P25302 SW NA                    |
| 978 LEDQDLYSINYIH  | gj 731532 sp P39956 RP NA                    |
| 979 TSSQPEYEHISTP  | gj 1723892 sp P53147 T, NA                   |
| 980 QLMKNKYCDVVHL  | gj 129733 sp P12383 PD NA                    |
| 981 FRRKDAYKRHVAM  | gj 417688 sp P32338 RM NA                    |
| 982 TFEEEQYETKTGL  | gj 2507068 sp P22148 M NA                    |
| 983 FLRKDRYDPTSQE  | gj 74645031 sp Q12180 I NA                   |
| 984 FNEGERYNNDGQL  | gj 729140 sp P40917 YA NA                    |
| 985 TIDSEYIDNMEV   | gj 74655046 sp Q12398 I NA                   |
| 986 KDDSTVYVKNEMP  | gj 1168610 sp P41696 A, NA                   |
| 987 YAPKSQYEMMVPP  | gj 2506540 sp P20134 SI NA                   |

|                     |                                            |
|---------------------|--------------------------------------------|
| 988 LMEKDSYPRFLRS   | gi 67477383 sp P49796 F NA                 |
| 989 LQENEAYECMVAA   | gi 1723116 sp P50876 UI NA                 |
| 990 <<Marker>>      | contol_spot NA                             |
| 991 IKKMEPYDDHSNM   | gi 85700957 sp Q7Z4H7  NA                  |
| 992 PAQSDSYVLRNMM   | gi 133777484 gb AAI106  NA                 |
| 993 RTSKTIYQGAGPM   | gi 73621450 sp Q5TC82  NA                  |
| 994 VEEGAEYTSNNM    | gi 1706799 sp P02671 FI NA                 |
| 995 HGSQGTYSNTKEN   | gi 51338754 sp P11137 HGSQGTYSNTKEN Y 6    |
| 996 KEEKYDYISRGEN   | gi 85541650 sp Q15652  NA                  |
| 997 MKVKDEYSERDEN   | gi 23396448 sp Q9UKT9 NA                   |
| 998 RQEECKYWHYDEN   | gi 51315961 sp Q86SF2  NA                  |
| 999 SQSVTFYIDNAEN   | gi 119575692 gb EAW55 NA                   |
| 1000 VREDDSYLFDLDN  | gi 116241348 sp Q96KQ NA                   |
| 1001 LKPLKTYVDPHTY  | gi 125333 sp P29317 EP [LKPLKTYVDPHTY Y 58 |
| 1002 LPCTGDYMNMSPV  | gi 547738 sp P35568 IR [LPCTGDYMNMSPV Y 7  |
| 1003 LPQDKEYYKVKEP  | gi 12643404 sp O60674 [LPQDKEYYKVKEP Y 1C  |
| 1004 LVEVASYCEESRG  | gi 149759367 ref XP_001 NA                 |
| 1005 MEGQHNYLCAGRN  | gi 90110048 sp P06401 F NA                 |
| 1006 ASSQDCYDIPRAF  | gi 90180201 sp Q13480 [ASSQDCYDIPRAF Y 40  |
| 1007 SPRDDGYAIKERN  | gi 27805715 sp Q15380 I NA                 |
| 1008 DCPEGYYADEDEN  | gi 57208981 emb CAI412 NA                  |
| 1009 PLFNTDYDILKSN  | gi 17375506 sp Q15054 I NA                 |
| 1010 VGSKVKYEVTVSN  | gi 12643723 sp Q13683 I NA                 |
| 1011 DGFTEAYESGQNNQ | gi 74750445 sp Q86V20  NA                  |
| 1012 LIENESYRTRKNNQ | gi 119600755 gb EAW80 NA                   |
| 1013 FASEPYNREGSQ   | gi 122939208 ref NP_001 NA                 |
| 1014 GPTCDEYAQKVRQ  | gi 60267755 sp P26639 [ NA                 |
| 1015 KPRSEDYDAGGSQ  | gi 119593507 gb EAW73 NA                   |
| 1016 VLSVDCYLNLSQ   | gi 119621330 gb EAX009 NA                  |
| 1017 GKRKLDYCECGTQ  | gi 119627965 gb EAX079 NA                  |
| 1018 PRNMDLYYQSYSQ  | gi 62512172 sp Q08828  NA                  |
| 1019 KHVEAVYIDIADR  | gi 130770 sp Q00169 PIF NA                 |
| 1020 MLDERGYCCYCR   | gi 18202941 sp Q9H2S6  NA                  |
| 1021 PSPSPPYTLMGCR  | gi 82582992 sp Q9UHC3 NA                   |
| 1022 SCRPRYVSSGCR   | gi 74737618 sp Q6PEX3 NA                   |
| 1023 SVDKEGYIIVADR  | gi 121941685 sp Q2Q1W NA                   |
| 1024 DPKVDSYVEKAVA  | gi 119626534 gb EAX061 NA                  |
| 1025 LAKTEKYWDGWFR  | gi 47606055 sp Q9Y570  NA                  |
| 1026 SGSDTKYKILEGR  | gi 147640896 sp Q9P219 NA                  |
| 1027 ATAEGLYWTLNGR  | gi 44887813 sp O75462 [ NA                 |
| 1028 FFNATSYLEVPGR  | gi 17433089 sp Q9UHC6 NA                   |
| 1029 DFRDGEYEAATL   | gi 109940213 sp Q15327 NA                  |
| 1030 SNEEYVYVRGRGR  | gi 119627578 gb EAX071 NA                  |
| 1031 GNEECTYDYVAVL  | gi 119627106 gb EAX067 NA                  |
| 1032 VGSWLKYIRFAGC  | gi 119598965 gb EAW78 NA                   |
| 1033 GRQFLKYVDPKLG  | gi 49036457 sp Q9BVG9 NA                   |
| 1034 LPSSSIYQCINLG  | gi 29611731 sp P59510  NA                  |
| 1035 YLKQPPYGMNGLG  | gi 417425 sp P32242 OT NA                  |
| 1036 FGDMSYVRSRKR   | gi 83305929 sp Q96RU8 NA                   |
| 1037 PWPKGLYVRSVAVL | gi 113418790 ref XP_001 NA                 |
| 1038 EIKKKKYNQMPVR  | gi 728984 sp P38398 BR NA                  |
| 1039 LGYEQRYHSGDVR  | gi 28201801 sp Q9P2B2  NA                  |



|      |                |                                            |
|------|----------------|--------------------------------------------|
| 1040 | PYFDQGYEAPGVR  | gi 71153839 sp O75934 I NA                 |
| 1041 | IKEETEYMELLAA  | gi 74749389 sp Q6UWJ1 NA                   |
| 1042 | FPRDGDYRDQDYR  | gi 12644371 sp P98175 F NA                 |
| 1043 | KRNQVSYVRPAEP  | gi 114149931 sp Q96AT NA                   |
| 1044 | RKTGEAYVQFEED  | gi 55977848 sp Q12849 C NA                 |
| 1045 | DEYEPNYSIQDDS  | gi 119604352 gb EAW83 NA                   |
| 1046 | DLSETIQEPFCS   | gi 143811385 sp O60673 NA                  |
| 1047 | YSKDGLYASLTTL  | gi 119601346 gb EAW80 NA                   |
| 1048 | GNCEDIYSSYHCS  | gi 71153499 sp P82279 C NA                 |
| 1049 | ESPKIPYEKQQLP  | gi 152112287 sp O94979 [ESPKIPYEKQQLP Y 80 |
| 1050 | PDYGALYEGRNPG  | gi 130225 sp P19174 PL [PDYGALYEGRNPG Y 7  |
| 1051 | NRTSQDYDQLPSC  | gi 88911265 sp Q13191 C NA                 |
| 1052 | EIINPNYMGVGP   | gi 119591435 gb EAW71 [EIINPNYMGVGP Y 91   |
| 1053 | TPGSATYVRYKPS  | gi 92058729 sp O60292 C NA                 |
| 1054 | LDRHVAYGGYSTP  | gi 55976600 sp Q9HBL0  NA                  |
| 1055 | QRFAKQYINAIKD  | gi 134044255 sp Q15149 NA                  |
| 1056 | FESTPVYPNAGRY  | gi 30172968 sp Q9NUB1 NA                   |
| 1057 | LDMLQYYLNLTEA  | gi 39932730 sp Q92484  NA                  |
| 1058 | KSGQGYYVEMTVG  | gi 6685248 sp P56817 B NA                  |
| 1059 | ADPINLYANAADI  | gi 231629 sp P19835 CE NA                  |
| 1060 | MDLLRQYLRVETQ  | gi 118601083 sp Q13085 NA                  |
| 1061 | STVKCDYENVPTT  | gi 50403780 sp Q16881  NA                  |
| 1062 | TQNL SAYIIPGTD | gi 25091514 sp O43895  NA                  |
| 1063 | DDWKGHYANVACA  | gi 13124582 sp P57727  NA                  |
| 1064 | YAYLFKYIIIIGDT | gi 46577636 sp P61019 F NA                 |
| 1065 | AQIQEPYTAVGYL  | gi 547686 sp P36915 GN NA                  |
| 1066 | YDRNKCYTAVVPL  | gi 400044 sp P01591 IGJ NA                 |
| 1067 | LSSREAYGRALDR  | gi 23831128 sp P18505 C NA                 |
| 1068 | VFLPVFYTAVFLT  | gi 1346170 sp P49685 G NA                  |
| 1069 | NKDNENYPNVKKA  | gi 7674059 sp O14626 G NA                  |
| 1070 | DVQYDLYLNVANR  | gi 417184 sp P26951 IL3 NA                 |
| 1071 | TFNRTGYANVTIY  | gi 116242527 sp Q01638 NA                  |
| 1072 | RVVESAYLNLSSSE | gi 547770 sp P07333 CS NA                  |
| 1073 | IHIETKYEDNKGS  | gi 147720965 sp Q9UKF NA                   |
| 1074 | LSSSVGYLQHPGS  | gi 92086999 sp Q15032 I NA                 |
| 1075 | ASYSDPYISQRLC  | gi 38372723 sp Q8NGL4 NA                   |
| 1076 | FLSEVAYLMEPLC  | gi 59797888 sp Q9H0E9  NA                  |
| 1077 | FYNNPAYADPGMC  | gi 143811383 sp Q96NT NA                   |
| 1078 | KPLDELYEKKANC  | gi 34098756 sp Q9UQDC NA                   |
| 1079 | SFNSTIYEVIGKS  | gi 47605541 sp Q9BZWE NA                   |
| 1080 | WVKSSSEYHENKKS | gi 20178235 sp Q9Y2H8  NA                  |
| 1081 | KPPKKS YVNYKVL | gi 146286060 sp Q8NDD NA                   |
| 1082 | KRRKPNYSSVDLS  | gi 119585708 gb EAW65 NA                   |
| 1083 | VTGNPSYTCSCLS  | gi 119591637 gb EAW71 NA                   |
| 1084 | GLRPEKYFWTGLS  | gi 126730 sp P22897 MR NA                  |
| 1085 | RKMPTDYIRNGVL  | gi 119593843 gb EAW73 NA                   |
| 1086 | FLINSNYVDPKFP  | gi 547692 sp P17483 HX NA                  |
| 1087 | LHSKENYDKYSEP  | gi 23822034 sp Q9HCQ7 NA                   |
| 1088 | RQSKNDYAVDLVL  | gi 83814829 ref YP_4462 NA                 |
| 1089 | ANQDTIYEGIGGP  | gi 85687376 sp P20908 C NA                 |
| 1090 | EIPESKYSPLGGP  | gi 9087155 sp Q12968 N NA                  |
| 1091 | LLDKPFYNDFERG  | gi 126407 sp P09917 LO NA                  |

|                    |                                              |
|--------------------|----------------------------------------------|
| 1092 IGSDDCYVGDGYS | gj 73919921 sp Q14520 I NA                   |
| 1093 PSETDGYVAPLTC | gj 119533 sp P04626 ER NA                    |
| 1094 AKSDIIVQTDAT  | gj 33112647 sp P06213 I NA                   |
| 1095 HRTCSDYSEMRAT | gj 116241333 sp Q8TDM NA                     |
| 1096 QFSDDEYKTPLAT | gj 74756617 sp Q5THJ4  NA                    |
| 1097 TAENAEYLRVAPQ | gj 2811086 sp P00533 E([TAENAEYLRVAPQ Y 11   |
| 1098 GAFGTVYKGIWIP | gj 119533 sp P04626 ER NA                    |
| 1099 ITSPFKYQSLLTK | gj 127796459 gb AAH12([ITSPFKYQSLLTK Y 141   |
| 1100 PIPSVPYAPFAAI | gj 143811452 sp Q13905 [PIPSVPYAPFAAI Y 504  |
| 1101 QPEQDEYDIPRHL | gj 8134339 sp P56945 B( NA                   |
| 1102 RYLNRNYWEKKQE | gj 71152119 sp O14964 I [RYLNRNYWEKKQE Y 3   |
| 1103 ATDDDFYDDPCFD | gj 127624 sp P15172 MY NA                    |
| 1104 EDCGGGYTPDCSS | gj 143811366 sp P11274 [EDCGGGYTPDCSS Y 3    |
| 1105 GLSKKIYSGDYR  | gj 10720097 sp Q12866 I [GLSKKIYSGDYR Y 74   |
| 1106 QKVAEDYVSVAAF | gj 23396831 sp Q969Q5 [QKVAEDYVSVAAF Y 11    |
| 1107 TLGGSPYGPVPE  | gj 120046 sp P11362 FG NA                    |
| 1108 DYGHPVYIVQEMP | gj 1706673 sp P52799 E [DYGHPVYIVQEMP Y 3    |
| 1109 EHRQLNYIQVDLE | gj 71152057 sp Q8WU2([EHRQLNYIQVDLE Y 43     |
| 1110 GAEKEYHAEGGK  | gj 2811086 sp P00533 E([GAEKEYHAEGGK Y 8     |
| 1111 IIPPVDYLPDNRT | gj 50897492 sp Q92738 I [IIPPVDYLPDNRT Y 729 |
| 1112 NNQLFLYDTHQNL | gj 143811440 sp P16885 [NNQLFLYDTHQNL Y 12   |
| 1113 PQNDDHYVMQEHR | gj 37999491 sp Q07912 ([PQNDDHYVMQEHR Y :    |
| 1114 QLNLKEYNLV    | gj 38258883 sp P50148 ([QLNLKEYNLV Y 356 P2  |
| 1115 GRYYEGYYAAGPG | gj 74751663 sp Q93052 I [GRYYEGYYAAGPG Y 3   |
| 1116 KELEEIYMLPRMR | gj 3182949 sp O14646 C [KELEEIYMLPRMR Y 10   |
| 1117 QNTDLIYQTGPKS | gj 32469749 sp Q8TBA6 [QNTDLIYQTGPKS Y 54    |
| 1118 TVRQGGYMPQ    | gj 729833 sp P40189 IL6 [TVRQGGYMPQ Y 915 F  |
| 1119 DKQRLSYGAFTNQ | gj 119370361 sp Q9ULH [DKQRLSYGAFTNQ Y 7     |
| 1120 EKDLPNYNWNSFG | gj 6016439 sp Q15726 K [EKDLPNYNWNSFG Y 1    |
| 1121 DERSWVYSPLHYS | gj 78099088 sp O60331 I [DERSWVYSPLHYS Y 6   |
| 1122 EFRDSTYDLPRSL | gj 46396035 sp Q9UQC2 [EFRDSTYDLPRSL Y 26    |
| 1123 FGQQKLYQVPNPQ | gj 8134360 sp Q14511 C NA                    |
| 1124 LPTTVDYSSVPKQ | gj 8928283 sp O00559 R [LPTTVDYSSVPKQ Y 4E   |
| 1125 QEYELYCEMGST  | gj 88911265 sp Q13191 ([QEYELYCEMGST Y 3     |
| 1126 SDEKVDYVQVDKE | gj 46396035 sp Q9UQC2 [SDEKVDYVQVDKE Y 6     |
| 1127 NGGPGPYVGQAGT | gj 14916543 sp O60716 ([ NA                  |
| 1128 SLDNGGYYISPRI | gj 125480 sp P07948 LYI [SLDNGGYYISPRI Y 19: |
| 1129 DEAISDYFRKQYS | gj 23831360 sp P31939 F NA                   |
| 1130 QAGMTGYGMPRQI | gj 586000 sp P37802 TA( NA                   |
| 1131 KEDQTEYLEERRV | gj 17865718 sp P08238 F NA                   |
| 1132 SGKIEKYNVPLNR | gj 20138067 sp Q9UHB6 NA                     |
| 1133 MVEDCLYETVKEI | gj 84029384 sp Q9NWQ([MVEDCLYETVKEI Y 18     |
| 1134 DLSDRVYLKTQLE | gj 51316025 sp Q8N4A0  NA                    |
| 1135 LLEAADYLERRER | gj 729978 sp Q05195 MA NA                    |
| 1136 HEGETSYIRVYPE | gj 3929377 sp Q13242 S NA                    |
| 1137 CRNATRYVVLHAS | gj 11387208 sp Q9UKU6 NA                     |
| 1138 AHPLSPYGETLTE | gj 143811460 sp Q9NP3( NA                    |
| 1139 DDYPGSYSPQDPS | gj 23813907 sp Q9NQG5( NA                    |
| 1140 LNTLAHYKIPEGA | gj 51701868 sp Q9Y4D7  NA                    |
| 1141 GSYRDSYDSYATH | gj 5921786 sp Q14011 C NA                    |
| 1142 AQGEMLYLATRIE | gj 27734215 sp Q9H9E1  NA                    |
| 1143 PSRNKPYISWPSS | gj 92090617 sp Q9Y5S2  NA                    |

|      |                 |                                             |
|------|-----------------|---------------------------------------------|
| 1144 | KLNCRLYRKANKS   | gi 113936 sp P01008 AN NA                   |
| 1145 | YGGFDDYGGYNNY   | gi 23503095 sp P31942 F NA                  |
| 1146 | AAAWKGYADIVQL   | gi 108885279 sp Q92882 NA                   |
| 1147 | EFVNQYYGSFKEA   | gi 1352513 sp P35228 N NA                   |
| 1148 | KEALKFYTDPSYF   | gi 59800456 sp Q9Y6W5 [KEALKFYTDPSYF Y 15   |
| 1149 | EEQKKYYNAMKKL   | gi 150417969 ref NP_00 [EEQKKYYNAMKKL Y 1   |
| 1150 | IQAEEWYFGKLGR   | gi 125370 sp P06241 FYI NA                  |
| 1151 | ELEEPVYEEPVE    | gi 73619965 sp Q8WWN NA                     |
| 1152 | YSEDDYVGYS DV   | gi 29337242 sp Q9UH99 NA                    |
| 1153 | DDISSYTTTTTI    | gi 21431730 sp O00767  NA                   |
| 1154 | TRFTDDYQLFEEL   | gi 62512173 sp Q13555 I NA                  |
| 1155 | KLAPITYPQGLAL   | gi 131806 sp P15153 RA NA                   |
| 1156 | LQGKSLYSYAGLA   | gi 131573277 gb ABO33 NA                    |
| 1157 | INEASNYNVTS DY  | gi 48474955 sp Q9HAU0 NA                    |
| 1158 | LRPQANYSQIHHP   | gi 116242614 sp Q96RT NA                    |
| 1159 | CLDRPIYPCRWLC   | gi 61216811 sp Q8N474  NA                   |
| 1160 | TAPNDLYLKLEDV   | gi 50401072 sp Q8NFU5 NA                    |
| 1161 | TPDEDYEYMN RQ   | gi 119534 sp P21860 ER NA                   |
| 1162 | PNRVEIYEKTVEV   | gi 134034199 sp Q96F07 NA                   |
| 1163 | LKSKMIYASSKDA   | gi 6831517 sp Q9Y281 C NA                   |
| 1164 | GSVGGTYRQKSMP   | gi 115502447 sp O43166 NA                   |
| 1165 | QLEEDLYDGQVLQ   | gi 20139178 sp Q9HB11 I NA                  |
| 1166 | SDVNKEYYTQNME   | gi 74762758 sp Q9NW64 NA                    |
| 1167 | IRELVPYDIFTEK   | gi 119621883 gb EAX01 NA                    |
| 1168 | EEADENYNSVNTR   | gi 3041737 sp Q12846 S NA                   |
| 1169 | QEKQELYGKLRST   | gi 145559478 sp Q14789 NA                   |
| 1170 | SEHENAYENVPEE   | gi 6225642 sp Q13113 P NA                   |
| 1171 | WMFSLGYINPKNS   | gi 32171483 sp Q8NFP9 NA                    |
| 1172 | DTTEPGYINIMEL   | gi 34098663 sp Q92613  NA                   |
| 1173 | YGPQGGYQPDY GQ  | gi 135162 sp P08247 SY NA                   |
| 1174 | ILDEDLYINANDQ   | gi 1705486 sp P54132 BI NA                  |
| 1175 | SGEGTDYINASYI   | gi 400199 sp P23471 PT NA                   |
| 1176 | SFTILSYLNATDL   | gi 13124142 sp Q9NRD0 NA                    |
| 1177 | LSGFELYGTVNGV   | gi 85682779 sp Q9ULT8  NA                   |
| 1178 | LPQLLAYPNPIDP   | gi 51338683 sp P62256 L NA                  |
| 1179 | CLKMVYYANVVGG   | gi 6648106 sp Q05086 U NA                   |
| 1180 | EPDYQVYLNASKV   | gi 28201801 sp Q9P2B2  NA                   |
| 1181 | TGKSADYVNL SLK  | gi 17369343 sp Q9P2S2  NA                   |
| 1182 | RYAGEVYGMIRFS   | gi 38258919 sp P42356 F NA                  |
| 1183 | VPRCTSYLNPGLP   | gi 13632586 sp O75747 I NA                  |
| 1184 | VDGKEIYNTIRRK   | gi 121743 sp P20936 RA [VDGKEIYNTIRRK Y 46C |
| 1185 | MLVTHDYTAVKED   | gi 8928460 sp O75962 TI NA                  |
| 1186 | AVALQDYMAPDCR   | gi 2498559 sp Q16674 M NA                   |
| 1187 | RKQLVIYEEISDP   | gi 115502458 sp O60225 NA                   |
| 1188 | PSPMPEYLN VHYYI | gi 1351190 sp P49116 TI NA                  |
| 1189 | FYKCEAYGRAFNW   | gi 152031765 sp Q03924 NA                   |
| 1190 | DTVQESYENVDSL   | gi 24418868 sp O14978  NA                   |
| 1191 | ASFSWTYEEI KEV  | gi 76803797 sp Q99698 I NA                  |
| 1192 | LYKNVCYVNL LFW  | gi 30316350 sp O94823  NA                   |
| 1193 | EFYKIH YWDTTTL  | gi 1169096 sp P46108 C NA                   |
| 1194 | QGPEIYSNTQFP    | gi 119599582 gb EAW79 NA                    |
| 1195 | TTMKKAYYLACGF   | gi 62900106 sp Q9UJWC NA                    |

|                    |                                            |
|--------------------|--------------------------------------------|
| 1196 AFIPFSYLVQWR  | gj 113041 sp P22966 AC NA                  |
| 1197 VQVSSAYVKTSEK | gj 20141658 sp O43399  NA                  |
| 1198 RYESSSYTDQFSR | gj 85700443 sp Q07157  NA                  |
| 1199 FQYEGTYKWVNP  | gj 116242483 sp P11413 [FQYEGTYKWVNP Y  NA |
| 1200 F5:17         | contol_spot NA                             |
| 1201 pY            | contol_spot NA                             |
| 1202 pY            | contol_spot NA                             |
| 1203 Triple Flaq   | contol_spot NA                             |
| 1204 pY            | contol_spot NA                             |
| 1205 pY            | contol_spot NA                             |
| 1206 Triple Flaq   | contol_spot NA                             |
| 1207 VDEREKYMIGNSV | gj 116242614 sp Q96RT NA                   |
| 1208 KEEMGDYIRSYSV | gj 97046413 sp Q567U6  NA                  |
| 1209 SKADEYYPEHTSV | gj 46397678 sp Q13017  NA                  |
| 1210 IISKMMYENTTTV | gj 30172802 sp Q15021  NA                  |
| 1211 PNEQNIYIVGVV  | gj 6624134 gb AAF1926  NA                  |
| 1212 SHSRELYTSKWTV | gj 134035045 sp O94886 NA                  |
| 1213 DGYQDGYWDGPHW | gj 124219 sp P23588 IF4 NA                 |
| 1214 GIENIHYLNDGLW | gj 119632280 gb EAX11 NA                   |
| 1215 KFSKAIYKYVNH  | gj 154240671 ref NP_77 NA                  |
| 1216 MFSRSKYASAEKW | gj 57162167 emb CAI39 NA                   |
| 1217 ITENYKYEEGSLQ | gj 20532415 sp O43548  NA                  |
| 1218 QQMLEGYSDPGIW | gj 133777266 gb AAI010 NA                  |
| 1219 LLECLDYLAPNP  | gj 22653810 sp O15344  NA                  |
| 1220 QKAGEGYEQTLLQ | gj 10834694 gb AAG237 NA                   |
| 1221 EGICDSYTDFTG  | gj 126366 sp P07942 LAI NA                 |
| 1222 RNEKFNYYVMQLQ | gj 97203020 sp Q5TCY1 NA                   |
| 1223 ENSCTYYECHYPP | gj 46397255 sp Q96E35  NA                  |
| 1224 MSSNLEYAKGYPP | gj 119611661 gb EAW91 NA                   |
| 1225 EDHKSYYAINTVY | gj 108860796 sp Q8IXI2  NA                 |
| 1226 KHTRTHYVDKPY  | gj 74762721 sp Q9BZE0  NA                  |
| 1227 QDEEYLYLVMDYY | gj 74762299 sp Q6DT37  NA                  |
| 1228 EMDDERYFNEMSA | gj 2498281 sp Q16204 C NA                  |
| 1229 IKEWPGYGSTLFD | gj 17433142 sp Q9HD67  NA                  |
| 1230 LVENVKYEDIYED | gj 152031557 sp Q92481 NA                  |
| 1231 LEASGDYKYSGRD | gj 125729 sp P12956 KU NA                  |
| 1232 TPAKSHYVFNLRD | gj 119619959 gb EAW99 NA                   |
| 1233 IPDAEYKITATD  | gj 60416428 sp O15056  NA                  |
| 1234 RFKCKIYVGMATD | gj 586092 sp P10828 TH NA                  |
| 1235 LMCQESYACSGTD | gj 34098716 sp Q9HBF4 NA                   |
| 1236 TRTKEKYRVVYTD | gj 3023467 sp O14627 C NA                  |
| 1237 AMQKWYYKDPQGE | gj 74710467 sp Q6Y7W6 NA                   |
| 1238 DWMEEEYRHIPGE | gj 1730125 sp Q10981 FI NA                 |
| 1239 EKTEQGYSTETA  | gj 115502355 sp O95671 NA                  |
| 1240 EYSCTPYNSLGTA | gj 119573141 gb EAW52 NA                   |
| 1241 DMETDHYSNVGE  | gj 61215334 sp Q96S59  NA                  |
| 1242 PEERDGYGRWNHE | gj 37999812 sp Q9UL42  NA                  |
| 1243 <<Marker>>    | contol_spot NA                             |
| 1244 APKLPPYVWVASE | gj 34535146 dbj BAC872 NA                  |
| 1245 LWYDQDYARFESP | gj 5870276 gb AAD5450  NA                  |
| 1246 DPESSDYGHVQSP | gj 32699509 sp Q14241  NA                  |
| 1247 NKFVDEYIISPSP | gj 119590881 gb EAW70 NA                   |

|      |                |                           |
|------|----------------|---------------------------|
| 1248 | EDVDLGYVEDGTP  | gj 14423634 sp Q9P0K1  NA |
| 1249 | SFCFLEYEDHKTA  | gj 23397427 ref NP_006 NA |
| 1250 | ETASSGYASVQGT  | gj 74751443 sp Q8TEB7  NA |
| 1251 | LEFYADYSDNPWL  | gj 119370373 sp P51530 NA |
| 1252 | GAIKDLYGDFKIT  | gj 2506889 sp P51674 G NA |
| 1253 | ISPNCGYINSHIT  | gj 585912 sp Q04912 RC NA |
| 1254 | RGQELIYAGMPIT  | gj 116241237 sp P53396 NA |
| 1255 | VDASDDYIFFNIT  | gj 152031605 sp Q5H8C NA  |
| 1256 | RSAKIEYVIPNNT  | gj 51094947 gb EAL241 NA  |
| 1257 | VFRSLKYAESDPT  | gj 17368466 sp Q14703  NA |
| 1258 | LEERTRYASPGPT  | gj 88997880 ref XP_938 NA |
| 1259 | AGRLGSYVINGRT  | gj 32129513 sp Q96KS0  NA |
| 1260 | KPSSPSYTVVGRT  | gj 125888011 sp Q3SX6 NA  |
| 1261 | TCYADGYEQVYQT  | gj 62510692 sp Q8N475  NA |
| 1262 | PRFSEIYHNINAD  | gj 114163 sp P27540 AR NA |
| 1263 | VAEWEKYIISLAD  | gj 126469 sp P23467 PT NA |
| 1264 | <<Marker>>     | control_spot NA           |
| 1265 | LPRVSAYVDTTAD  | gj 72533478 gb AAI0095 NA |
| 1266 | RYSNEKYQKFKAV  | gj 74757585 sp Q6GMR7 NA  |
| 1267 | FTPCKPEYEGPFCV | gj 116241339 sp Q07864 NA |
| 1268 | LLPKTKYVACVCV  | gj 37081671 sp Q9P2V4  NA |
| 1269 | KFHAIEIYFDHDLQ | gj 45477317 sp Q8N302  NA |
| 1270 | IYVSDGYCNSRIV  | gj 23503036 sp P19021  NA |
| 1271 | MDSEFRYTLFPIV  | gj 129557 sp P25105 PT NA |
| 1272 | PILEPKYAVEKIV  | gj 119607188 gb EAW86 NA  |
| 1273 | SMEKGVYVCIKV   | gj 74747057 sp Q5VU65  NA |
| 1274 | GVADGAYVSPWKP  | gj 4063508 gb AAC9831 NA  |
| 1275 | KQCKDIYCDYLDF  | gj 12229836 sp Q99665  NA |
| 1276 | PWSENKYDISKDF  | gj 74708278 sp Q5XXA6 NA  |
| 1277 | GRPGDGYMGMAGF  | gj 48429103 sp P61978  NA |
| 1278 | IQLKDTYETNTFF  | gj 2833281 sp Q16816 P NA |
| 1279 | LDDGPAYEDCSEF  | gj 108757328 ref YP_63 NA |
| 1280 | QKTERDYVGTLEF  | gj 74758897 sp Q70Z35  NA |
| 1281 | SCFTKDYEEDHKA  | gj 117558 sp P09603 CS NA |
| 1282 | GKDDHGYKQSKDM  | gj 109825713 sp Q68D5 NA  |
| 1283 | GPDAEHYWSLAAM  | gj 152061018 gb AAI505 NA |
| 1284 | AASTAIYVYMYSF  | gj 13878808 sp Q9HD45 NA  |
| 1285 | <<Marker>>     | control_spot NA           |
| 1286 | DPSEQRYGMIRTF  | gj 148886707 ref NP_00 NA |
| 1287 | LASALDYETLYTF  | gj 62287160 sp Q9BYE9 NA  |
| 1288 | SEHDFAYQDPKVH  | gj 51701722 sp O43157  NA |
| 1289 | LPSKDDYFQVLCM  | gj 119631984 gb EAX11 NA  |
| 1290 | MEAKNSYVRDDAI  | gj 23503103 sp Q12933  NA |
| 1291 | EKIKSLYVNMIDI  | gj 4895029 gb AAD3270 NA  |
| 1292 | MEPSDSYEVLSKI  | gj 13124090 sp Q9UBF2 NA  |
| 1293 | SDAEKYSQKEDI   | gj 51094986 gb EAL242 NA  |
| 1294 | WGEETDYTPVWCM  | gj 2507533 sp P06132 D NA |
| 1295 | GWEELVYYTVPLI  | gj 17380133 sp O75323  NA |
| 1296 | YSSWSDYIHICNI  | gj 37538034 sp Q8TEB1  NA |
| 1297 | PCKEDYNGCPNI   | gj 32469734 sp Q8IZD9  NA |
| 1298 | FASSNIYSDSERI  | gj 74751127 sp Q8N9S7  NA |
| 1299 | LIIDEYYDNTGRI  | gj 20532415 sp O43548  NA |

|                     |                                             |
|---------------------|---------------------------------------------|
| 1300 PPRVPKYVLTCHK  | gi 74735426 sp O60284 NA                    |
| 1301 VSEWTEYKTADGK  | gi 52783427 sp O14776 NA                    |
| 1302 EVEAESYEGSRIK  | gi 114762 sp P06748 NP NA                   |
| 1303 TKEKEFYDEWPIK  | gi 90111861 sp P51160 F NA                  |
| 1304 ADRKDG YVWSGKK | gi 20178106 sp Q8WXH NA                     |
| 1305 ESEESLYKPGAKK  | gi 77416856 sp P35663 C NA                  |
| 1306 <<Marker>>     | contol_spot NA                              |
| 1307 NIRNDKYAGEEGM  | gi 73921624 sp Q86U86 NA                    |
| 1308 DKAKDKYVRSLWK  | gi 115502390 sp P07332 NA                   |
| 1309 NYECLVYVQLPFM  | gi 125731 sp P13010 KU NA                   |
| 1310 DMSCAKYEFTDAL  | gi 94536836 ref NP_0607 NA                  |
| 1311 HDFRPDYLR LGAL | gi 22654276 sp O94762 I NA                  |
| 1312 ALSHSGYVSFQAL  | gi 118568027 sp Q6ZRQ NA                    |
| 1313 NFFVDDYARFTIL  | gi 68053323 sp Q9NYU2 NA                    |
| 1314 ELDPQKYHDLAKL  | gi 10720321 sp Q9UL62 NA                    |
| 1315 ALRKDWYSDCSKL  | gi 76803799 sp O15151 I NA                  |
| 1316 IDAEGKYMAEALL  | gi 14285643 sp O94826 NA                    |
| 1317 NIEADTYWCMSKL  | gi 25008319 sp Q8WUA7 NA                    |
| 1318 VSPA EYYHQMALL | gi 116242494 sp P10071 NA                   |
| 1319 RARGDEYLSWQHM  | gi 21264427 sp P30711 C NA                  |
| 1320 IEKNIEYVSSSAA  | gi 152031673 sp Q92766 NA                   |
| 1321 VITEPIYPEVVHM  | gi 116241235 sp Q13362 NA                   |
| 1322 YSKNQKYTQVEIM  | gi 42538984 ref NP_9737 NA                  |
| 1323 AHERTLYTDIAIG  | gi 20137971 sp Q9H5Z1 NA                    |
| 1324 CLGAGGYADNDIG  | gi 119594421 gb EAW74 NA                    |
| 1325 RVDPNGYMMMSPS  | gi 547738 sp P35568 IR S [RVDPNGYMMMSPS Y   |
| 1326 SEDLSAYASISFQ  | gi 547738 sp P35568 IR S NA                 |
| 1327 <<Marker>>     | contol_spot NA                              |
| 1328 SFLDSGYRILGAV  | gi 21903479 sp P18206 \ NA                  |
| 1329 SIRMKRYILHFHS  | gi 47117832 sp P21709 E NA                  |
| 1330 SQESEDYSQPSTS  | gi 266516 sp Q00987 MC [SQESEDYSQPSTS Y 3   |
| 1331 TATKDTYDALHMQ  | gi 23830999 sp P20963 C [TATKDTYDALHMQ Y 1  |
| 1332 AIKMERYKDNFTA  | gi 146345416 sp Q15375 NA                   |
| 1333 AIKMGRYEESFAA  | gi 19860819 sp P54760 E NA                  |
| 1334 FDERQPYAHMNGG  | gi 124240 sp P08069 IGF [FDERQPYAHMNGG Y    |
| 1335 FQNGLYKZIAIDVR | gi 2809059 dbj BAA2450 NA                   |
| 1336 FVLDDQYTSSTGT  | gi 585361 sp Q08881 ITk [FVLDDQYTSSTGT Y 51 |
| 1337 GEEQSQYMHV GSC | gi 1168948 sp P22001 Kc [GEEQSQYMHV GSC Y   |
| 1338 SQGVDTYVEMRPV  | gi 547770 sp P07333 CS [SQGVDTYVEMRPV Y 7   |
| 1339 KKGNFNYVEFTRI  | gi 20141521 sp P24844 M [KKGNFNYVEFTRI Y 15 |
| 1340 GVCAERYSQEVFE  | gi 31077008 sp O15304 S [GVCAERYSQEVFE Y 3  |
| 1341 EDCYGN YDNLLSQ | gi 17380162 sp O15530 I [EDCYGN YDNLLSQ Y 3 |
| 1342 EEEEEAYGWMDFG  | gi 120952 sp P01350 GA [EEEEAYGWMDFG Y 8    |
| 1343 EELQDDYEDMMEE  | gi 114787 sp P02730 B3, [EELQDDYEDMMEE Y 8  |
| 1344 GALSPLYGVPETN  | gi 27735219 sp P49023 F [GALSPLYGVPETN Y 18 |
| 1345 FMDDDSYSHHSGL  | gi 5915890 sp P51636 C, [FMDDDSYSHHSGL Y 1  |
| 1346 KFKVEYHAGGST   | gi 6840802 sp P55263 AI NA                  |
| 1347 SSDGHEIYVDPM   | gi 129890 sp P09619 PG [SSDGHEIYVDPM Y 57   |
| 1348 <<Marker>>     | contol_spot NA                              |
| 1349 KDESVDYV PMLDM | gi 129890 sp P09619 PG [KDESVDYV PMLDM Y 7  |
| 1350 MAPYDNYVPSAPE  | gi 129890 sp P09619 PG [MAPYDNYVPSAPE Y 7   |
| 1351 VSRLTLYDIAHTP  | gi 6648067 sp P40926 M [VSRLTLYDIAHTP Y 56] |

|                    |                                            |
|--------------------|--------------------------------------------|
| 1352 SSPGGVYATRSSA | gi 55977767 sp P08670 [SSPGGVYATRSSA Y 6   |
| 1353 QPDSAGYTALHYA | gi 74740664 sp Q53RE8 [QPDSAGYTALHYA Y 6   |
| 1354 LQRTLHYECIVLV | gi 20455192 sp Q9UUKK9 [LQRTLHYECIVLV Y 74 |
| 1355 NLDPLVYLLSKLT | gi 21450889 sp Q9BSJ2 [NLDPLVYLLSKLT Y 83  |
| 1356 TPQGREYGMILG  | gi 60415926 sp Q7KZF4 NA                   |
| 1357 QGPPEIYSDTQFP | gi 119599582 gb EAW79 [QGPPEIYSDTQFP Y 19  |
| 1358 EQYNEQYGAVRTP | gi 62511129 sp Q9BQ04 [EQYNEQYGAVRTP Y 1   |
| 1359 APDKRIYQFTAAS | gi 74735515 sp O75563 [APDKRIYQFTAAS Y 19  |
| 1360 ANVLARYASICQQ | gi 134254704 gb ABO65 NA                   |
| 1361 RDEESPYATSLYH | gi 74728034 sp Q8IV50 [RDEESPYATSLYH Y 2C  |
| 1362 SAVGFEYQGKTEK | gi 2498954 sp Q14247 [SAVGFEYQGKTEK Y 2    |
| 1363 KAVCSTYLQSRYY | gi 21431782 sp Q9H2X6 [KAVCSTYLQSRYY Y 3   |
| 1364 GGSDQNYDIVTIG | gi 73920059 sp Q96PE3 [GGSDQNYDIVTIG Y 35  |
| 1365 FNHTEDYVLLPDE | gi 461848 sp Q05048 [FNHTEDYVLLPDE Y 36    |
| 1366 TSRESNYFGLSPE | gi 118572680 sp Q01804 NA                  |
| 1367 PPHPLTYSQLPRV | gi 61213006 sp Q8WXE [PPHPLTYSQLPRV Y 3    |
| 1368 KGETGKYLRLPQL | gi 125711 sp P12931 SR NA                  |
| 1369 <<Marker>>    | control_spot NA                            |
| 1370 SSTETCYSaipKA | gi 38257363 sp O75369 [SSTETCYSaipKA Y 25  |
| 1371 SDMHRGYADSPSK | gi 116241280 sp Q01518 NA                  |
| 1372 PASTPTYSPAPTQ | gi 74737148 sp Q6P1N0 [PASTPTYSPAPTQ Y 2C  |
| 1373 KDPVGVYCRVRPL | gi 118572664 sp Q02241 NA                  |
| 1374 AEDGEYDDPFAG  | gi 74735515 sp O75563 NA                   |
| 1375 DEVEDLYELLKLV | gi 143955280 sp Q7L8W [DEVEDLYELLKLV Y 97  |
| 1376 DSLEPPYVMKKYH | gi 417110 sp P25364 HC NA                  |
| 1377 EKWEPKYLITPNL | gi 11133517 sp Q03125 I NA                 |
| 1378 YAIEGEYKTLATD | gi 135077 sp P08153 SW NA                  |
| 1379 TTVNDSYQNIWLM | gi 56757368 sp P07248 / NA                 |
| 1380 TTLTEKYVNSLEY | gi 1711597 sp P46676 SI NA                 |
| 1381 NESNEDYLGNEKF | gi 50400296 sp Q04052 / NA                 |
| 1382 LENDDDYERRNLV | gi 74644956 sp Q06266 NA                   |
| 1383 VRYDEEYVYHEDM | gi 1351976 sp P05085 AI NA                 |
| 1384 ATDATKYENSFSG | gi 417456 sp P19880 YA NA                  |
| 1385 TSQSTEYENGAQI | gi 1708907 sp P35192 M NA                  |
| 1386 FSNEDIYDNIDPD | gi 730473 sp P11938 RA NA                  |
| 1387 LLEQLAYVDNFIP | gi 88984445 sp P32389 / NA                 |
| 1388 LVFSDGYVVKETI | gi 20178306 sp Q15418 I NA                 |
| 1389 VISGEGYGRKADI | gi 97536681 sp Q9Y2U5 NA                   |
| 1390 <<Marker>>    | control_spot NA                            |
| 1391 VTECDNYTIRNLV | gi 25091053 sp Q62132 I NA                 |
| 1392 GAEEGIYTLNLNE | gi 29427817 sp Q8IVH8 I NA                 |
| 1393 PDKDQYIIFGTE  | gi 30316147 sp Q9Y4K4 NA                   |
| 1394 QKDYEKYAAKDFQ | gi 6685621 sp Q9Y6R4 / NA                  |
| 1395 LKDTPLYTDNTAN | gi 67460824 sp Q6P2Q9 NA                   |
| 1396 SKEKSKYKFPAA  | gi 149944548 ref NP_05 NA                  |
| 1397 TWRMEPYNSSCCN | gi 119578863 gb EAW58 NA                   |
| 1398 YNEGDIYHTVLWM | gi 20455169 sp O15460 I NA                 |
| 1399 DERDCLYEYVPDN | gi 121945557 sp Q17RQ NA                   |
| 1400 ELSMEDYWIELEN | gi 74723724 sp Q8N392 NA                   |
| 1401 MSVEGDYTYLRIN | gi 74753511 sp Q9Y5B9 NA                   |
| 1402 QRLEECYEIIKKN | gi 30316390 sp Q9NTI2 / NA                 |
| 1403 CEEEFKYAMLALN | gi 119611661 gb EAW91 NA                   |

|                     |                                             |
|---------------------|---------------------------------------------|
| 1404 EDYFTLYADVPLN  | gi 116241346 sp Q96RP NA                    |
| 1405 LENGNYIDLDLV   | gi 547738 sp P35568 IR NA                   |
| 1406 LIEDNEYTAREGA  | gi 125474 sp P06239 LC  [LIEDNEYTAREGA Y 39 |
| 1407 DYEGYKYERIDGG  | gi 88911273 sp Q12873 NA                    |
| 1408 SERDELYAQWGKG  | gi 74732865 sp Q9BRD0 [SERDELYAQWGKG Y      |
| 1409 YWYYNKYINVKKG  | gi 89029850 ref XP_933 NA                   |
| 1410 GRKKIKYKSLTRN  | gi 38503102 sp Q8WXU NA                     |
| 1411 IQSKNLYKIPLRN  | gi 55665099 emb CAH72 NA                    |
| 1412 PICMDGYSEIVQN  | gi 18202358 sp P78317 F NA                  |
| 1413 DCYNHHYKPKGYN  | gi 585673 sp P38567 HY NA                   |
| 1414 KPGDTGYKIPRGG  | gi 134151 sp P18405 S5 NA                   |
| 1415 ISNDAYWVMNAP   | gi 6174947 sp O94810 R NA                   |
| 1416 NKNDPNYLCMEAP  | gi 17433091 sp Q9ULW2 NA                    |
| 1417 SHCDLDYGRLPAP  | gi 56404431 sp O00634 I NA                  |
| 1418 LIYPTEYCSVPGG  | gi 134034993 sp Q14997 NA                   |
| 1419 GHVKEIYKLVALG  | gi 119615897 gb EAW95 NA                    |
| 1420 LESNEKYAISVKG  | gi 108861911 sp Q8WZ4 NA                    |
| 1421 REEVHKYVQMMGG  | gi 62901464 sp Q92547 NA                    |
| 1422 SHTPWDYVINDLG  | gi 7959167 dbj BAA9597 NA                   |
| 1423 CKEMSEYCSTLCR  | gi 83300977 sp P42575 NA                    |
| 1424 AISAEVYTEEDAA  | gi 125193 sp P10644 KA NA                   |
| 1425 GGDVDSYTVSAFR  | gi 126469 sp P23467 PT NA                   |
| 1426 MAQELKYGDIVER  | gi 3122765 sp O14802 R NA                   |
| 1427 QNAADSYSWVPER  | gi 21759074 sp Q9NPY3 NA                    |
| 1428 VFEEIYKTLVER   | gi 116241319 sp Q8NHU NA                    |
| 1429 CTAAEAYTLTEGR  | gi 126733 sp P23368 MA NA                   |
| 1430 GASPDAYLESGGR  | gi 113428936 ref XP_001 NA                  |
| 1431 ACPEPKYRGPLHC  | gi 74749277 sp Q6Q0C1 NA                    |
| 1432 CLDMFRYTN SYHC | gi 11493456 gb AAG355 NA                    |
| 1433 GNLSEKYV FITGC | gi 22507405 ref NP_683 NA                   |
| 1434 IFLEVKYDDLYHC  | gi 74756617 sp Q5THJ4 NA                    |
| 1435 KHKDTEYKKT DIC | gi 3121839 sp O14967 C NA                   |
| 1436 RTSLDLYANVIHC  | gi 1708404 sp P51553 ID NA                  |
| 1437 YPKGESYEDLVQR  | gi 6226609 sp Q16877 F NA                   |
| 1438 IIFLSGYVSVPRR  | gi 74728760 sp Q8N328 NA                    |
| 1439 EDEMEIYGYNLSR  | gi 30316388 sp Q9H7F0 NA                    |
| 1440 PGNEHLYENLCVL  | gi 84029599 sp Q7L591 I NA                  |
| 1441 GDFEKPYCQVTTR  | gi 22095550 sp Q9HCU4 NA                    |
| 1442 RLWGDYFNPKTR   | gi 18202501 sp Q15029 I NA                  |
| 1443 DQCCPEYECVCDP  | gi 401413 sp P04275 VW NA                   |
| 1444 GLSNSIYVVRDP   | gi 125472 sp P10721 KIT NA                  |
| 1445 ILSDGVYERHMDP  | gi 148887469 sp Q8TBC NA                    |
| 1446 LFFDLGYDNSLDP  | gi 22001556 sp Q99999 NA                    |
| 1447 PYSADMYVQPVC   | gi 2833276 sp Q16633 O NA                   |
| 1448 EYAERGYERHRAS  | gi 74749365 sp Q6UN15 NA                    |
| 1449 HSSVSEYHPADGY  | gi 2833239 sp Q12929 E NA                   |
| 1450 SQGLDDYGARSMS  | gi 73917636 sp Q9UQB8 NA                    |
| 1451 ESPDGSYTEEQSQ  | gi 118572321 sp Q96RU: [ESPDGSYTEEQSQ Y 5   |
| 1452 GPGGALYARVARR  | gi 47606791 sp Q96GP6 NA                    |
| 1453 DVGFSSYELVATP  | gi 74758999 sp Q7L2J0  [DVGFSSYELVATP Y 66  |
| 1454 RKTEDTYFISSAG  | gi 147644956 sp Q3V6T NA                    |
| 1455 LIEQEEYLNQVK   | gi 30173386 sp Q9NTJ3 NA                    |



|      |                |                                              |
|------|----------------|----------------------------------------------|
| 1456 | CHTKKDYEEIGPS  | gi 47117647 sp P61158 / NA                   |
| 1457 | RECMSHYLRVFNF  | gi 21362575 sp Q96CW£ NA                     |
| 1458 | AEVKAQYEEIAQR  | gi 547754 sp P35908 K2: NA                   |
| 1459 | VKQRIDYANLTGI  | gi 13431674 sp O00159 I NA                   |
| 1460 | SDENSYYPDMEY   | gi 50403806 sp Q9ULJ8  NA                    |
| 1461 | GIYNSPYIIPGTQ  | gi 25453448 sp P14920 C NA                   |
| 1462 | QKTPENYPNAGLT  | gi 130316 sp P00747 PLI NA                   |
| 1463 | PHHDDLVLNASSF  | gi 110825735 sp Q9UMR NA                     |
| 1464 | HVDDDNYVNARSL  | gi 27734461 sp Q9Y644  NA                    |
| 1465 | FHYCNAYLNAVRW  | gi 135006 sp P08842 ST: NA                   |
| 1466 | STLLCQYINLQLL  | gi 730870 sp P41252 SY NA                    |
| 1467 | CISFDRYLNIVHA  | gi 2829400 sp P49682 C: NA                   |
| 1468 | DKMAEAYSEIGMK  | gi 23830999 sp P20963 C [DKMAEAYSEIGMK Y 1:  |
| 1469 | ESMERHYLRVTAQ  | gi 22095552 sp Q9NYQ7 NA                     |
| 1470 | KECNLVYLIPHAV  | gi 118228 sp P21728 DR NA                    |
| 1471 | KKILDVYANVCGV  | gi 21263572 sp Q9UNE0 NA                     |
| 1472 | LAVSEEYLDLRLT  | gi 13432140 sp P22455 F [LAVSEEYLDLRLT Y 75: |
| 1473 | EYPDGWYTDIRFS  | gi 401056 sp P31213 S5: NA                   |
| 1474 | KLEDSRYGRLPFS  | gi 3123225 sp P21399 IR NA                   |
| 1475 | SLANQQYVSGDGS  | gi 74761587 sp Q9HA77  NA                    |
| 1476 | CKNSEGYCFMGKC  | gi 20137479 sp Q9H2U9 NA                     |
| 1477 | FDEKSYYESHLGS  | gi 74734724 sp Q9NZC3 NA                     |
| 1478 | GVKKPIYLSKLGs  | gi 62286460 sp Q13535 , NA                   |
| 1479 | ASMDDIYFEHTIS  | gi 21363000 sp Q8WXI4  NA                    |
| 1480 | EVYEHVYETVDIS  | gi 59798474 sp Q9NUP9 NA                     |
| 1481 | KTEEEAYALKKIS  | gi 85683250 sp Q8N4T0  NA                    |
| 1482 | QLSENPYSSGRIS  | gi 27151703 sp Q9UPU3 NA                     |
| 1483 | VFSHDAYMCTLIS  | gi 119599207 gb EAW78 NA                     |
| 1484 | IWCHDSYESDGKS  | gi 74762429 sp Q7Z3I7 Z NA                   |
| 1485 | FDESTDYICPMEP  | gi 42558987 sp Q8ND30 NA                     |
| 1486 | NLDNTIYIPFARS  | gi 119599837 gb EAW79 NA                     |
| 1487 | SRFELEYALNARS  | gi 82582303 sp Q59H18  NA                    |
| 1488 | ASMRDLYIKNGQG  | gi 47117762 sp P61225 F NA                   |
| 1489 | HNNEGSYLAHTQG  | gi 115764755 ref XP_781 NA                   |
| 1490 | AFTAYKYVDICFP  | gi 74752819 sp Q9HD87 NA                     |
| 1491 | AKADQCYEDVRVS  | gi 1706004 sp P31146 C NA                    |
| 1492 | ANRTVDYEEVHWL  | gi 17366834 sp Q9H251  NA                    |
| 1493 | CCKPDTYVPTCWL  | gi 38372629 sp Q9BYR8 NA                     |
| 1494 | GLRENDYLLIHSC  | gi 125991851 sp Q9H70£ NA                    |
| 1495 | SKESSIYVTKDSC  | gi 112983 sp P00505 AA NA                    |
| 1496 | EAAPQDYEAARG   | gi 41713225 sp Q14674 I NA                   |
| 1497 | KKYICTYINVQER  | gi 83305554 sp P49792 F NA                   |
| 1498 | GIQFYLYPNLTRL  | gi 18203322 sp Q9NSD5 NA                     |
| 1499 | NEDYAGYIIPAP   | gi 10720285 sp Q9UNH7 NA                     |
| 1500 | LEHRKDYINAYSH  | gi 17369347 sp Q9P2W9 NA                     |
| 1501 | YQYMETYMGPALF  | gi 20981701 sp Q14974 I NA                   |
| 1502 | AVAFQGYLRQTRC  | gi 3024000 sp Q13651 I1 [AVAFQGYLRQTRC Y 4   |
| 1503 | HSDSEMYVMPAEE  | gi 82592659 sp Q8WV28 [HSDSEMYVMPAEE Y 8     |
| 1504 | LGSQEGYVPKNFI  | gi 6685489 sp O75791 G [LGSQEGYVPKNFI Y 45   |
| 1505 | PPDHQYYNDFPGK  | gi 17380299 sp P29353 £ [PPDHQYYNDFPGK Y 3   |
| 1506 | RKEVSKYSIDIQRS | gi 129892 sp P16234 PG [RKEVSKYSIDIQRS Y 75  |
| 1507 | TNSITVYASVTLP  | gi 9297047 sp Q13291 S [TNSITVYASVTLP Y 327  |

1508 YCPDPLYEVMLKC gj|125484|sp|P08581|ME [YCPDPLYEVMLKC|Y|13  
1509 KVSSTHYLLPER gj|27923810|sp|Q9UJM3 [KVSSTHYLLPER|Y|85  
1510 LQLDNQYAVLENQ gj|119599582|gb|EAW79 [LQLDNQYAVLENQ|Y|2  
1511 SHNSALYSQVQKS gj|17366642|sp|Q99704|I [SHNSALYSQVQKS|Y|4  
1512 ASQLGVYRAFVDN gj|143811366|sp|P11274 [ASQLGVYRAFVDN|Y|5  
1513 DDLHTLYHKKSY gj|74762751|sp|Q9HD26 [DDLHTLYHKKSY|Y|457  
1514 DSPPALYAEP LDS gj|17366642|sp|Q99704|I [DSPPALYAEP LDS|Y|29  
1515 NEPVSDYINANII gj|84028248|sp|Q06124|I [NEPVSDYINANII|Y|304|  
1516 PRDFAAYRS gj|115973|sp|P10747|CD [PRDFAAYRS|Y|218|P1C  
1517 QSSSPVYGSSAKT gj|27735219|sp|P49023|F [QSSSPVYGSSAKT|Y|8  
1518 SNHHAVYDVPPSV gj|8134339|sp|P56945|B [SNHHAVYDVPPSV|Y|3  
1519 VEDDADYEPSPSN gj|10720065|sp|Q13094|I [VEDDADYEPSPSN|Y|1  
1520 AQENV D YVILKH gj|6166019|sp|P20273|C [AQENV D YVILKH|Y|842|  
1521 RLPVDY YGIPFAA gj|74745207|sp|Q5T6F2| [RLPVDY YGIPFAA|Y|84  
1522 SKDKDAYSSFGSR gj|73620957|sp|O15523|I [SKDKDAYSSFGSR|Y|6  
1523 TFD AHIY EGRVIQ gj|547803|sp|Q05655|KP [TFDAHIY EGRVIQ|Y|64|  
1524 TNS EDNY VPMNPG gj|46396035|sp|Q9UQC2 [TNS EDNY VPMNPG|Y|4  
1525 TVVHSGYRHQVPS gj|729833|sp|P40189|IL6 [TVVHSGYRHQVPS|Y|7  
1526 APGAGHYEDTILK gj|146328566|sp|Q9UM7 [APGAGHYEDTILK|Y|16  
1527 LNP KQDYCSICLQ gj|126253822|sp|Q8N3P· NA  
1528 SFFEGGYPAYASG gj|38348376|ref|NP\_940 NA  
1529 ATAAAGYVSTPLP gj|21928235|dbj|BAC057 NA  
1530 IRPKRKYEKPKV gj|59797889|sp|Q9H2F5| NA  
1531 LSDAQIYVDKVKQ gj|6831570|sp|O14879|IF NA  
1532 INEESDYHDLELV gj|30316346|sp|O43861| NA  
1533 LNARRVYMQSQAN gj|57013078|sp|Q7Z699| NA  
1534 RVKELTYQTEEDR gj|3041707|sp|P13535|M NA  
1535 RELNKLYPTHACR gj|136120|sp|P17532|TP NA  
1536 GMVIPNYSSRTEY gj|22256789|sp|Q96N76| NA  
1537 SEKEDKYE E EIKL gj|54039751|sp|P67936| NA  
1538 QQGMTAYGTRRHL gj|2829431|sp|P51911|C NA  
1539 NYRMKSYKNKALN gj|3122273|sp|O15131|IL NA  
1540 QKYLENYLNRLLT gj|13124441|sp|O14939|I NA  
1541 THSDYQYSQRSQA gj|20139105|sp|Q99959|I NA  
1542 GGGGGGYAPYGRP gj|20454955|sp|Q14526|I NA  
1543 DMHDWLYAFNPLL gj|119364606|sp|Q12756| NA  
1544 KPIIDL YEEMGKV gj|12644008|sp|P30085| NA  
1545 LAEKVVYVGVWIP gj|46577576|sp|P61073| NA  
1546 SVHSRFYDLSSKY gj|20978558|sp|Q9UNM NA  
1547 ISAKSNYNFEKPF gj|51338598|sp|P62826| NA  
1548 EKRIQTYLQSTKP gj|12644008|sp|P30085| NA  
1549 APFFRDYIMSAGL gj|114150036|sp|Q3SYC NA  
1550 TDPSGTYHAWKAN gj|108936006|sp|Q8TAA NA  
1551 EDDYVGYSDVDQQ gj|29337242|sp|Q9UH99 NA  
1552 DPDTLLYLLQQKS gj|74731648|sp|Q96F24| NA  
1553 GGSRDY YSSRSQS gj|5921786|sp|Q14011|C NA  
1554 DQQHDSYSQNQQS gj|8928305|sp|Q92804|R NA  
1555 YGGSRDY YSSRSQ gj|5921786|sp|Q14011|C NA  
1556 PLPENPYHSRPRP gj|8039804|sp|P51970|NI NA  
1557 SQARSDYHVTQLQ gj|131573277|gb|ABO33 NA  
1558 PPPPPAYRTGSLK gj|20981729|sp|Q15654| [PPPPPAYRTGSLK|Y|13  
1559 QAPHVHYARL KTL gj|119534|sp|P21860|ER NA

|                    |                                              |
|--------------------|----------------------------------------------|
| 1560 TILTHAYSRVVL  | gi 2494303 sp Q14232 E NA                    |
| 1561 TRFTEEYQLFEEL | gi 20177970 sp Q9UQM7 NA                     |
| 1562 TRGAPPYRHIDPF | gi 585912 sp Q04912 RC NA                    |
| 1563 LKSTGNYVDFYSA | gi 84028193 sp Q9UQB3 NA                     |
| 1564 VTLEDLYNGATRK | gi 1706474 sp P31689 DI NA                   |
| 1565 SVCAEAYNPDEEE | gi 400115 sp P31323 KA NA                    |
| 1566 LFYTNLYCSILFL | gi 21264488 sp P41231 F NA                   |
| 1567 DETFGEYRSLESD | gi 1705571 sp P32004 L1 NA                   |
| 1568 IGSNSTYLTSKSK | gi 50400481 sp Q86SQ4 NA                     |
| 1569 EKELLIYLRVATW | gi 3253117 gb AAC2430; NA                    |
| 1570 ASQDPLYINIARA | gi 1717829 sp Q06418 T NA                    |
| 1571 FFLCSVYVPMCTE | gi 62298045 sp Q9ULV1  NA                    |
| 1572 EPPPDGYENVVNI | gi 20139300 sp Q9Y3Q0 NA                     |
| 1573 RPTLVWYQPDGTR | gi 29337230 sp Q13444  NA                    |
| 1574 EKTNETYGKLEAV | gi 118177 sp P01040 CY NA                    |
| 1575 YESESAYPNAELV | gi 33112667 sp Q13613 I NA                   |
| 1576 SEAESCINIART  | gi 131530 sp P26045 PTI NA                   |
| 1577 GHTQTDYINASF  | gi 1172724 sp P43378 P NA                    |
| 1578 NSARSDYLRVSWV | gi 126469 sp P23467 PTI NA                   |
| 1579 NREKNRYPNILPN | gi 126471 sp P23469 PTI NA                   |
| 1580 SHSHSDYINASPI | gi 116242738 sp Q92932 NA                    |
| 1581 TEGEMEYEEITL  | gi 71658825 sp P78352 I NA                   |
| 1582 TQKQPIYVMELV  | gi 115502390 sp P07332 NA                    |
| 1583 TNVKELYGKIAEA | gi 17375873 sp O14908  NA                    |
| 1584 TDVETTYADFIAS | gi 48428970 sp P61925 I [TDVETTYADFIAS Y 8 P |
| 1585 LPCTGDYMNMSPV | gi 547738 sp P35568 IRS [LPCTGDYMNMSPV Y 7   |
| 1586 MESIDYVNPES   | gi 14194891 sp O43561 I NA                   |
| 1587 QALIEAYVDMRKI | gi 68571766 sp P33991 I NA                   |
| 1588 TISPVLNINFP   | gi 37999860 sp O14686 I NA                   |
| 1589 GRRRSEYVEMYPV | gi 6831585 sp Q16621 N NA                    |
| 1590 ARTCQLYPNAS   | gi 18203318 sp Q9NRJ5  NA                    |
| 1591 SANGEVYGLLSV  | gi 9988061 sp P48552 N NA                    |
| 1592 AWQTHTYEIKAY  | gi 124028630 sp Q92753 NA                    |
| 1593 ERSETEYALLRTS | gi 74741766 sp Q5JQS6  NA                    |
| 1594 KTASGDYIDSSWE | gi 41018464 sp Q86UX7  NA                    |
| 1595 LQHMQDYPNYKYR | gi 20532272 sp Q9BT81  NA                    |
| 1596 NALRGGYSTPQTL | gi 46396283 sp Q12791 I NA                   |
| 1597 KTATNIYIFNLAL | gi 32363499 sp P41143  NA                    |
| 1598 SPVPKTYDMLKAG | gi 20139105 sp Q99959 I NA                   |
| 1599 ADRESRYEEEEEQ | gi 74753511 sp Q9Y5B9  NA                    |
| 1600 SGVGPEYARPEV  | gi 119589445 gb EAW69 NA                     |
| 1601 INSAETYFESARV | gi 68565296 sp Q9H3L0  NA                    |
| 1602 QIWKTSYAQHKQV | gi 114596449 ref XP_001 NA                   |
| 1603 ALLETEYGNTRV  | gi 1770451 emb CAA669 NA                     |
| 1604 RTQDVKYIEMKRV | gi 29611911 sp Q9Y3A2  NA                    |
| 1605 RIHEPFYKKVAAA | gi 74747057 sp Q5VU65  NA                    |
| 1606 LKDDYDYVLISV  | gi 74751081 sp Q8N766  NA                    |
| 1607 FYCNTYYIMVLAW | gi 1352529 sp P48029 S NA                    |
| 1608 KMPEVDYVVLSEW | gi 27808656 sp O00142 I NA                   |
| 1609 LLMEPEYANICFW | gi 119584818 gb EAW64 NA                     |
| 1610 LSNESRYMIYEFW | gi 74760025 sp Q8N987  NA                    |
| 1611 SKAEDEYEHEVDW | gi 119591752 gb EAW71 NA                     |

|                    |                                            |
|--------------------|--------------------------------------------|
| 1612 ASSQETYGKSPFW | gi 74723330 sp Q7Z4G4 [ASSQETYGKSPFW Y 4   |
| 1613 AHSKVTYEAHKEY | gi 32171483 sp Q8NFP9 NA                   |
| 1614 EKRTDGYAAFQEY | gi 34098413 sp Q15311 I NA                 |
| 1615 KRERDEYKRRCFY | gi 32425493 gb AAH104 NA                   |
| 1616 SDNEYFYVDFREY | gi 544320 sp P36888 FL` [SDNEYFYVDFREY Y 5 |
| 1617 CPENSHYEVCGPP | gi 117949403 sp Q9Y6R` NA                  |
| 1618 GGAADDYGKAGPP | gi 109892840 sp Q9ULL NA                   |
| 1619 VEKGDYYEAHQMY | gi 74738593 sp Q7L5D6  NA                  |
| 1620 GNQDSGYGRSGSY | gi 119623229 gb EAX02 NA                   |
| 1621 RPKVKYMSKPSY  | gi 119576355 gb EAW55 NA                   |
| 1622 CRPSDPYSMNSVY | gi 118572660 sp O43151 NA                  |
| 1623 IGFFTDYEIGPVY | gi 74721310 sp Q9Y238  NA                  |
| 1624 AKDERIYVTNYYY | gi 119611102 gb EAW90 NA                   |
| 1625 GAWENPYTALAFA | gi 77416517 sp Q9UEF7 NA                   |
| 1626 IGSESAYESFLSA | gi 1170875 sp P46821 M NA                  |
| 1627 LCNNFSYVVMLSA | gi 2498243 sp Q13286 C NA                  |
| 1628 DHYDPDYEFLLQD | gi 143811452 sp Q13905 NA                  |
| 1629 GAMNDQYHRAARD | gi 81175048 sp Q495M9  NA                  |
| 1630 YASMLPYNNKDRD | gi 729978 sp Q05195 M NA                   |
| 1631 KEEADRYQRLKDE | gi 29336622 sp Q14683  NA                  |
| 1632 RVCDSCYDSIKDE | gi 51316866 sp Q8IWB7  NA                  |
| 1633 FTDFDKYMTISDE | gi 3123230 sp P55884 IF NA                 |
| 1634 YKNRPDYVSEEEE | gi 83305554 sp P49792 F NA                 |
| 1635 VDHIYADVGE    | gi 88909266 sp Q16630  NA                  |
| 1636 NDEKDYHDVNFE  | gi 113414409 ref XP_497 NA                 |
| 1637 GYRDPYHNWMHA  | gi 3182954 sp O00408 P NA                  |
| 1638 ADEVVKYIDTKNE | gi 41018471 sp Q8NEG5 NA                   |
| 1639 ILDTDEYVLKyme | gi 74762202 sp Q5JVL4  NA                  |
| 1640 ARSEAGYGPFGQE | gi 19860819 sp P54760 E NA                 |
| 1641 LCCESYGKINPE  | gi 13959538 sp O15105  NA                  |
| 1642 MGGFDGYVRLNTA | gi 52783044 sp Q6JEL2  NA                  |
| 1643 <<Marker>>    | control_spot NA                            |
| 1644 QQLEPLYLNLHAF | gi 113045 sp P12821 AC NA                  |
| 1645 YKEAQEYGSFGTA | gi 34223721 sp P29144  NA                  |
| 1646 LGEGESYSMPTAF | gi 127819 sp P22736 NR NA                  |
| 1647 RNEQDFYAAVDDF | gi 18202948 sp Q9H8V3  NA                  |
| 1648 ANYMPGYHSHKDF | gi 32172451 sp Q12913 I NA                 |
| 1649 IIECLKYICTGDF | gi 60392986 sp Q92878 I NA                 |
| 1650 LAEKYKYSIAIP  | gi 110815960 sp Q460N NA                   |
| 1651 VGSCSSYEDKTIP | gi 155369266 ref NP_00` NA                 |
| 1652 MGRMDTYFEDPLT | gi 12585217 sp Q9Y6A2  NA                  |
| 1653 SFDMLRYVETLLT | gi 68565328 sp Q9NXX6 NA                   |
| 1654 EQSCEAYKHRGNT | gi 17433039 sp Q9C0A0  NA                  |
| 1655 IDFAQEYEDVLNT | gi 119605464 gb EAW85 NA                   |
| 1656 VVSEPPYYATDYT | gi 74737318 sp Q6P4A8  NA                  |
| 1657 MYANFGYSINGDA | gi 109127525 ref XP_001 NA                 |
| 1658 LEEEVHYGSSPLA | gi 30913318 sp Q8TDD2 NA                   |
| 1659 TRQEGLYAMGPLA | gi 48429264 sp Q9UJX0  NA                  |
| 1660 DKEKREYVLVGAD | gi 121957949 sp O1509C NA                  |
| 1661 LVDCGIYEIVPVC | gi 148677790 gb EDL097 NA                  |
| 1662 KYEDNIYMIYFV  | gi 34098756 sp Q9UQDC NA                   |
| 1663 TLANNTYVQKYFV | gi 119603447 gb EAW83 NA                   |

|                     |                                             |
|---------------------|---------------------------------------------|
| 1664 <<Marker>>     | contol_spot NA                              |
| 1665 DMDEEDYAWLEIV  | gi 12229697 sp O95696 I NA                  |
| 1666 KHGDEIYIAPSGV  | gi 74731866 sp Q96GX9 NA                    |
| 1667 PQFEAKYYKMEIV  | gi 41018366 sp Q9BYT9  NA                   |
| 1668 TFLEPAYPTPGHV  | gi 126302563 sp O15230 NA                   |
| 1669 RIPPYDDYPVVFLP | gi 73621365 sp Q5EBL8 [RIPPYDDYPVVFLP Y 10  |
| 1670 GASTGIYEALRLR  | gi 134254702 gb ABO65 [GASTGIYEALRLR Y 44   |
| 1671 GPARLEYEENEKK  | gi 547738 sp P35568 IRS [GPARLEYEENEKK Y 46 |
| 1672 RISGLIYEETRGV  | gi 124504316 gb AAI281 [RISGLIYEETRGV Y 52  |
| 1673 TRRSLGYAYVNFQ  | gi 119627671 gb EAX07 [TRRSLGYAYVNFQ Y 5    |
| 1674 PSHARTYSSNTTL  | gi 27734865 ref NP_775 NA                   |
| 1675 LPHSEGYMPVVPNF | gi 23831069 sp Q9NRM1 NA                    |
| 1676 QLENDSYAKEKPF  | gi 119576348 gb EAW55 NA                    |
| 1677 FVPSPSYFDVVYL  | gi 74762141 sp Q15198 I NA                  |
| 1678 YCRYDNYADSLRF  | gi 74750447 sp Q86V42  NA                   |
| 1679 HPQYTAYNEAWRF  | gi 2506538 sp Q02962 P NA                   |
| 1680 CPCSDCYLDSAKA  | gi 5915798 sp O75936 B NA                   |
| 1681 TLCSDYFAGGLH   | gi 47605903 sp Q8NEMC NA                    |
| 1682 HLREITYKEKKPH  | gi 20141039 sp Q9HBT8 NA                    |
| 1683 SKSSESYGIIQH   | gi 21757251 dbj BAC050 NA                   |
| 1684 DISNNEYLEYGSH  | gi 145559462 sp O14936 NA                   |
| 1685 <<Marker>>     | contol_spot NA                              |
| 1686 RDMDDAYDRLTRH  | gi 123081 sp P07686 HE NA                   |
| 1687 QRGDPIYVTELTH  | gi 7023332 dbj BAA9192 NA                   |
| 1688 VWEIDEYIDFEKI  | gi 17380163 sp O60313  NA                   |
| 1689 CCSNISYERDGEQ  | gi 32171848 sp Q8IV20 C NA                  |
| 1690 ALSPPTYLQGGYA  | gi 13626838 sp P58012 F NA                  |
| 1691 NEWFTKYTEMDDYA | gi 51316541 sp Q9UKD2 NA                    |
| 1692 NWMESSYWDGRYA  | gi 61252474 sp P54869 t NA                  |
| 1693 LRQMEDYHYAHLI  | gi 32469678 sp Q14185 I NA                  |
| 1694 ARQEKDYSSLCDK  | gi 119602885 gb EAW82 NA                    |
| 1695 EVNETQYNEMFGM  | gi 143811429 sp Q04721 NA                   |
| 1696 YIPKDAYFSMMDK  | gi 119591292 gb EAW70 NA                    |
| 1697 GLEECNYECKGEK  | gi 14602977 gb AAH099  NA                   |
| 1698 CLKDVVYKNNDFK  | gi 17369343 sp Q9P2S2  NA                   |
| 1699 ESSEILYRNKLGK  | gi 73621383 sp Q8NEN9 NA                    |
| 1700 ELSSPEYPRPYPK  | gi 117949604 sp O00187 NA                   |
| 1701 GDCQEPYAINDSK  | gi 114626350 ref XP_001 NA                  |
| 1702 HPKEGPHYVEDLSK | gi 50403793 sp Q96L93  NA                   |
| 1703 SAFSERYLGMPSK  | gi 67460566 sp Q8N608  NA                   |
| 1704 LKEMLKYSRNCEG  | gi 148887400 sp O15068 NA                   |
| 1705 EFYKDTYNKCLKTK | gi 231724 sp P21926 CD NA                   |
| 1706 <<Marker>>     | contol_spot NA                              |
| 1707 KLKNQEYETLDHL  | gi 73921624 sp Q86U86  NA                   |
| 1708 TAGQEKYHSVCHL  | gi 37999892 sp Q9HOT7  NA                   |
| 1709 GLSAEKYSVATHL  | gi 119619965 gb EAW99 NA                    |
| 1710 AASEYKYVVKHKM  | gi 32172451 sp Q12913 I NA                  |
| 1711 AHEDIKYEQACIL  | gi 68053318 sp Q9H3S7  NA                   |
| 1712 SLANSPYATLASA  | gi 20532299 sp O75132  NA                   |
| 1713 KEAEESYMMAKSL  | gi 134035047 sp Q6ZXV  NA                   |
| 1714 TACEILYERMKSL  | gi 3023637 sp Q14562 D NA                   |
| 1715 QKEYEDYEVASSL  | gi 82802803 gb ABB924  NA                   |

|                    |                                              |
|--------------------|----------------------------------------------|
| 1716 LRVQDTYLDCGTL | gj 74705745 sp O60486 I NA                   |
| 1717 KPRDSKYPCSDKM | gj 73620045 sp Q8IYX7 C NA                   |
| 1718 NQSEAGYHILQGM | gj 553586 gb AAA66955. NA                    |
| 1719 PQDKEYYKVKEPG | gj 12643404 sp O60674 . [PQDKEYYKVKEPG Y 11  |
| 1720 QDSNPLYKSAITT | gj 124973 sp P26010 ITB NA                   |
| 1721 QQDGKDYIPINAI | gj 143811474 sp P17948 [QQDGKDYIPINAI Y 116  |
| 1722 REGSKRYCIQTKH | gj 125987789 sp Q07075 NA                    |
| 1723 RIIDSEYTAQEGA | gj 1705485 sp P51451 BI NA                   |
| 1724 RQPFVKYATLISN | gj 116242617 sp P48357 NA                    |
| 1725 DKPKQEYLNPEVE | gj 3913590 sp Q15303 E NA                    |
| 1726 DTSNPTYTSALGG | gj 76803654 sp P29323 E [DTSNPTYTSALGG Y 7   |
| 1727 <<Marker>>    | control_spot NA                              |
| 1728 DVYSTDYRVVGGH | gj 2497560 sp Q16620 N [DVYSTDYRVVGGH Y 7    |
| 1729 EADGVYAASGGS  | gj 46241292 gb AAS828 NA                     |
| 1730 EIGEGAYGKVFKA | gj 266423 sp Q00534 CD [EIGEGAYGKVFKA Y 24   |
| 1731 AIKMDRYKDNFTA | gj 1711371 sp P54764 EI [AIKMDRYKDNFTA Y 92  |
| 1732 KPDLERYEAQAHG | gj 84028176 sp P35670 / NA                   |
| 1733 PPEPGPYAQPSVN | gj 1169096 sp P46108 CI [PPEPGPYAQPSVN Y 2   |
| 1734 SLDNPDYQQDFFP | gj 2811086 sp P00533 E [SLDNPDYQQDFFP Y 1    |
| 1735 CSPQPEYVNQPDV | gj 119533 sp P04626 ER [CSPQPEYVNQPDV Y 1    |
| 1736 VTSTDEYLDLSAP | gj 120050 sp P22607 FG [VTSTDEYLDLSAP Y 76   |
| 1737 SSSIDEYFSEQPL | gj 90110827 sp P17181 I [SSSIDEYFSEQPL Y 48  |
| 1738 GRNPGFYVEANPM | gj 130225 sp P19174 PL [GRNPGFYVEANPM Y 7    |
| 1739 GEEDTEYMTSSR  | gj 115855 sp P22681 CB [GEEDTEYMTSSR Y 7     |
| 1740 TGFLTEYVATRWW | gj 232066 sp P27361 MK [TGFLTEYVATRWW Y 1    |
| 1741 ADIDGQYAMTRAQ | gj 461854 sp P35222 CT [ADIDGQYAMTRAQ Y 8    |
| 1742 DFGMTRYVLDDEY | gj 116242835 sp P42681 NA                    |
| 1743 SFMMTPYVVTRY  | gj 2507195 sp P45983 M [SFMMTPYVVTRY Y 1     |
| 1744 TQEGPLYVIVECA | gj 13432140 sp P22455 F NA                   |
| 1745 HQEFSDYDNPIFE | gj 97536681 sp Q9Y2U5  NA                    |
| 1746 QKIGDKYISFARK | gj 6685621 sp Q9Y6R4 N NA                    |
| 1747 PCYTPYVVAPEVL | gj 1346538 sp P49137 M NA                    |
| 1748 <<Marker>>    | control_spot NA                              |
| 1749 QHEKLSYINTHNS | gj 1710804 sp P38165 R NA                    |
| 1750 GRCGSTYVNNKTF | gj 586313 sp P38128 SM NA                    |
| 1751 PDYPPNYILFLNN | gj 134095 sp P08579 RU NA                    |
| 1752 SRGDNVYVVTEVL | gj 13124058 sp P57764 C [SRGDNVYVVTEVL Y 1   |
| 1753 VSIYEGYTLPHAI | gj 62420975 gb AAX822 NA                     |
| 1754 VSLEEIYSGCTKR | gj 8928155 sp Q9UDY4 I [VSLEEIYSGCTKR Y 17   |
| 1755 ETEVELYNEFPEP | gj 1709999 sp P51149 R. [ETEVELYNEFPEP Y 18  |
| 1756 NLDGLEYKLHDFG | gj 1172027 sp P43490 N. [NLDGLEYKLHDFG Y 1   |
| 1757 EDFLKDYIHINIG | gj 129383 sp P17844 DD NA                    |
| 1758 VVGGEDYEEVDY  | gj 74727495 sp Q86UK7  [VVGGEDYEEVDY Y 3     |
| 1759 LTAFLYDEVHPK  | gj 94730596 sp Q6IBS0  [LTAFLYDEVHPK Y 30    |
| 1760 ASGYAHYEEQEN  | gj 51702204 sp Q9Y3S2  [ASGYAHYEEQEN Y 31    |
| 1761 NDQDGEYCPEVKL | gj 68566065 sp P78362 E [NDQDGEYCPEVKL Y 3   |
| 1762 LKKEDIYAVEIVG | gj 6226869 sp P34932 H. [LKKEDIYAVEIVG Y 336 |
| 1763 GKQKLQYEGIFIK | gj 2498882 sp Q15459 S [GKQKLQYEGIFIK Y 75   |
| 1764 PDYGALYEGRNPG | gj 130225 sp P19174 PL [PDYGALYEGRNPG Y 7    |
| 1765 DNDITPYLVSRFY | gj 23831382 sp Q13523 I [DNDITPYLVSRFY Y 84  |
| 1766 QSAPQIYGPPQYN | gj 116242614 sp Q96RT. [QSAPQIYGPPQYN Y 9    |
| 1767 NEEENIYSVPHDS | gj 29611783 sp Q9NRY4 [NEEENIYSVPHDS Y 11    |

|                     |                                             |
|---------------------|---------------------------------------------|
| 1768 SSAGLIYIDPSNL  | gi 20137621 sp O95071  [SSAGLIYIDPSNL Y 174 |
| 1769 <<Marker>>     | contol_spot NA                              |
| 1770 PKEDPIYDEPEGL  | gi 17366642 sp Q99704  [PKEDPIYDEPEGL Y 36: |
| 1771 ETAKGDYPLEAVR  | gi 20178296 sp P14618   NA                  |
| 1772 EAEAAIYHLQLFE  | gi 20178296 sp P14618  [EAEAAIYHLQLFE Y 39C |
| 1773 REVDAEYEARSRL  | gi 74729129 sp Q8N6H7 NA                    |
| 1774 REYDQLYEEYTRT  | gi 4558641 gb AAD2267 [REYDQLYEEYTRT Y 4:   |
| 1775 HTGEKPYECVECG  | gi 147742906 sp Q08ER NA                    |
| 1776 KYWENLYLKNGGI  | gi 1177049 sp P46974 Z  NA                  |
| 1777 KKKMGGEYNDLQPS | gi 114814 sp P14164 BA NA                   |
| 1778 RETPNAYANVAQL  | gi 549671 sp P36093 PH NA                   |
| 1779 PLSFTDYTISTAL  | gi 131653 sp P25502 PU NA                   |
| 1780 KRYSTTYVEALQS  | gi 1168927 sp P43634 CI NA                  |
| 1781 NVVDPWYINPSGF  | gi 113022 sp P21192 AC NA                   |
| 1782 DLNMPAYVKFNFM  | gi 127962 sp P16333 NC NA                   |
| 1783 KSPDTNYLFMGDY  | gi 50402236 sp P62714 F NA                  |
| 1784 EASGITYEDRPSK  | gi 729833 sp P40189 IL6 NA                  |
| 1785 RQEEAEYVRALFD  | gi 1169096 sp P46108 CI NA                  |
| 1786 VYDDGKYVYVTE   | gi 1730070 sp P51812 K NA                   |
| 1787 VEREQEYIRRQLE  | gi 29427585 sp O95819   NA                  |
| 1788 CWSKATYIYMKAA  | gi 74743633 sp Q5SRH9 NA                    |
| 1789 NSSFEVYCDMETM  | gi 12230074 sp Q14314   NA                  |
| 1790 <<Marker>>     | contol_spot NA                              |
| 1791 YYSKIEYQNHLSM  | gi 62296764 sp Q13129   NA                  |
| 1792 RIKNEPYQVVECA  | gi 52783467 sp Q96AE7  NA                   |
| 1793 FRAESKYTFERWM  | gi 93204574 sp O94887   NA                  |
| 1794 IFSKVKYNNVEYM  | gi 119615516 gb EAW95 NA                    |
| 1795 GKQEGVYAWIGIN  | gi 74752912 sp Q9NQZ7 NA                    |
| 1796 KACENLYFTLGIN  | gi 34223733 sp P59046   NA                  |
| 1797 RYSSSGYSSAEIN  | gi 55958101 emb CA1131 NA                   |
| 1798 ALKGIDYETVPIN  | gi 119601687 gb EAW81 NA                    |
| 1799 DWREKGYVTPVKN  | gi 115741 sp P07711 CA NA                   |
| 1800 LEEAEIYFKININ  | gi 13633994 sp Q9UBN4 NA                    |
| 1801 LLSEQKYGALVNN  | gi 152125805 sp Q96CB NA                    |
| 1802 AKDNSIYVVANIG  | gi 88952267 sp Q9NY84  NA                   |
| 1803 ELSCDHYCHNYIG  | gi 19860140 sp P48740   NA                  |
| 1804 DREM KDYEPKGG  | gi 121949057 sp Q3SYE NA                    |
| 1805 GTKVDDYWEPGKG  | gi 119585619 gb EAW65 NA                    |
| 1806 KRYMDDYIFTYIG  | gi 23821872 sp Q12965   NA                  |
| 1807 CAPPTAYIDFARQ  | gi 39932641 sp P60174  NA                   |
| 1808 FVSSDYNNENDWN  | gi 146345530 sp P20061 NA                   |
| 1809 GLCDPNYKDVDWN  | gi 119624708 gb EAX04 NA                    |
| 1810 IFGDLEYVTVEGG  | gi 113412849 ref XP_001 NA                  |
| 1811 PFPELRYLSLAYN  | gi 150378449 ref NP_89 NA                   |
| 1812 TISKGGYLQGNVN  | gi 12585385 sp Q9UPY5 NA                    |
| 1813 MLIEELYAFMPAR  | gi 119629151 gb EAX08 NA                    |
| 1814 SGPKGPYVSWGAR  | gi 119587448 gb EAW67 NA                    |
| 1815 QQRKNDYIITGGG  | gi 110815960 sp Q460N NA                    |
| 1816 YGVCVYEDVPAR   | gi 134034147 sp Q86XL NA                    |
| 1817 CECDQGYIMVRKG  | gi 41017299 sp Q14767   NA                  |
| 1818 FAFKDKYKQFFLG  | gi 113463 sp P12236 AD NA                   |
| 1819 AFEKNHYVVGAEER | gi 57015304 sp Q04741   NA                  |

1820 EWRELYDSTCER gj|729167|sp|P07357|CO NA  
1821 PREEGLYFAARDR gj|119613520|gb|EAW93 NA  
1822 RVSPKGYESVGER gj|92117045|ref|YP\_5767 NA  
1823 VDYEIEYVCRGER gj|12643873|sp|Q9UBS5 NA  
1824 DFEGSGYTDLQER gj|33112396|sp|Q9NQ76 NA  
1825 FHENRKYYNKTEC gj|149047690|gb|EDM00 NA  
1826 GRNETGYLSSVEC gj|81175180|sp|Q9P2G3 NA  
1827 INESENYEALLEC gj|74727834|sp|Q86X12|C NA  
1828 LNKKSIYSRVPEC gj|113421409|ref|XP\_001 NA  
1829 PSPCGKYISCAEC gj|124056465|sp|P05107 NA  
1830 GEYSTGYIDNVTL gj|90185107|sp|Q13753|I NA  
1831 CMPKEYEPPDPR gj|6330365|dbj|BAA8650 NA  
1832 LADQTPYPNTPPR gj|149271283|ref|XP\_917 NA  
1833 LYSTFTYMNPAQR gj|1351096|sp|P48436|S NA  
1834 VDYEEKYGRMFPR gj|74746777|sp|Q5VIR6| NA  
1835 EATEEIIYLTVPQR gj|17433093|sp|Q9UQF2 NA  
1836 SQCNEMYINSSQR gj|14194461|sp|Q99996| NA  
1837 YGRDLDYSDHPNG gj|23503093|sp|P38159| NA  
1838 DKFNKYNPVGAS gj|399033|sp|Q01432|AM NA  
1839 GHVEDDYILFDCP gj|119618320|gb|EAW97 NA  
1840 KLCKLDYACKLAS gj|61675704|ref|NP\_001 NA  
1841 SPCQSYVQAPAS gj|56205464|emb|CAI20 NA  
1842 ARQGEQYMNTRCP gj|3122245|sp|Q14642|I5 NA  
1843 GIQDEKYYQICES gj|29839394|sp|Q9BY41| NA  
1844 VGDDKKYTSMKES gj|116242695|sp|Q9HC1| NA  
1845 ALSTAKYKNWPES gj|83288393|sp|Q92954|I NA  
1846 EEKCQAYESNRES gj|1168366|sp|P43652|AI NA  
1847 NGIEACYCNMGFS gj|42559012|sp|Q9HBW NA  
1848 VGDEGRYQCVAFS gj|114627229|ref|XP\_52 NA  
1849 WYRNCHYANLNGL gj|9087217|sp|P22105|TI NA  
1850 SGREIYPNASLL gj|115940|sp|P06731|CE NA  
1851 ISALLQYINLSLT gj|37537862|sp|Q9UJX5| NA  
1852 KIGEGTYGVVYKG gj|115922|sp|P06493|CD [KIGEGTYGVVYKG|Y|1  
1853 MLLASKYEEIYPP gj|8134359|sp|P78396|C NA  
1854 VRMLDDYEEISAG gj|57015409|sp|Q8IWT3| NA  
1855 FGLPPRYQPDVKF gj|20455027|sp|Q9UJ83| NA  
1856 MNPLSPYLNVDPR gj|18201964|sp|O14925| NA  
1857 LGWYPPYANPPPE gj|13629029|sp|Q08397|I NA  
1858 HGGLRGYLRVFFR gj|12229870|sp|Q9UI09| NA  
1859 LGTVMRYEEIELR gj|30580486|sp|Q9BZQ4 NA  
1860 RWLAVDYENVRPD gj|129018|sp|P04181|OA NA  
1861 DAGCRPYMAPERI gj|1170596|sp|P45985|M NA  
1862 PLAAYCYLRVVGK gj|1709347|sp|P51957|NI NA  
1863 NGGTLYYMAPEHL gj|60393639|sp|Q13546|I NA  
1864 IRRHKNYLRVVGK gj|34922250|sp|Q9UKV5 NA  
1865 VPQVKFYEEIKEY gj|116241253|sp|P35626 NA  
1866 EVGTIRYMAPEVL gj|12643724|sp|Q13873|I NA  
1867 SSDGHEIYVDPM gj|129890|sp|P09619|PG [SSDGHEIYVDPM|Y|5  
1868 FENNGDYMDMKQA gj|129892|sp|P16234|PG [FENNGDYMDMKQA|Y|  
1869 GVEGSDYINASFL gj|125978|sp|P10586|PT NA  
1870 TDSLSTYINANYI gj|134039192|sp|Q15256 NA  
1871 YPNDSVYANWMLS gj|547807|sp|P07949|RE [YPNDSVYANWMLS|Y|1



1872 PAVILFYVNACFF gj|6226142|sp|Q99835|S NA  
1873 FMPPTYTEVDPC gj|74752618|sp|Q9H3M7 NA  
1874 LGRNLDYVCEGPC gj|81905882|sp|Q9DA19| NA  
1875 THATDKYSDYHPC gj|74758686|sp|Q6ZMW: NA  
1876 AYVETKYSPPAIS gj|2501458|sp|Q14694|U NA  
1877 NIDKSLYVAEYHS gj|116241327|sp|P26196 NA  
1878 QKRSDSYVLEHS gj|37537861|sp|Q9UJX4| NA  
1879 GKIKEWYKHGNS gj|147744568|sp|P13645 NA  
1880 PGHGDIYASFYNS gj|59803098|sp|Q16851|I NA  
1881 DLPEETYETKLPS gj|73619948|sp|Q6UY09| NA  
1882 GLVPTDYVEILPS gj|12643956|sp|Q9Y5X1| NA  
1883 PAEEPEYAYHIPS gj|143811399|sp|Q86SQ| NA  
1884 DDNEDEYAPVIQS gj|462334|sp|Q03933|HS NA  
1885 PSWGEKYQYPDTS gj|90652851|ref|NP\_054 NA  
1886 TFTATGYVVVTSS gj|116242740|sp|Q15269 NA  
1887 KKKCDEYIPGTTSS gj|117168275|ref|NP\_10 NA  
1888 ADTQEAYSSVPVS gj|1708274|sp|P55317|HI NA  
1889 FLSKDYKPLIIVS gj|74753323|sp|Q9UH65 NA  
1890 TWEYEEYIIGPVS gj|68565259|sp|Q96G30| NA  
1891 IGLMEVYKNTPET gj|17368720|sp|Q9C0E2| NA  
1892 RATKPPYECPVET gj|116241271|sp|P55201 NA  
1893 CNYNLPYVCKKGT gj|3288885|gb|AAC2558 NA  
1894 GADFTKYAIMLFT gj|119574493|gb|EAW54 NA  
1895 RKWDDDYVRYWFT gj|6581091|gb|AAF1845 NA  
1896 DDSLDGYVFGTGT gj|126549|sp|P06887|LV NA  
1897 RTDDLVLVNLVME gj|3183003|sp|Q14289|F, [RTDDLVLVNLVME|Y|8  
1898 VFPCSVYVPDEWE gj|33112647|sp|P06213|I [VFPCSVYVPDEWE|Y|1  
1899 APVYSVYVSKLHPP gj|71153548|sp|O75886|I [APVYSVYVSKLHPP|Y|37  
1900 DSFLQRYSSDPTG gj|2811086|sp|P00533|E [DSFLQRYSSDPTG|Y|11  
1901 EEISAMYSSVNKP gj|84029384|sp|Q9NWQ|I [EEISAMYSSVNKP|Y|31  
1902 GGWMEDYDYVHLQ gj|8134339|sp|P56945|B [GGWMEDYDYVHLQ|Y|  
1903 SYLPLSYWQQP gj|730980|sp|P40238|TP [SYLPLSYWQQP|Y|631|  
1904 EDDQEVYDDVAEQ gj|6166197|sp|O15117|F [EDDQEVYDDVAEQ|Y|5  
1905 LLTIDRYLAIVHA gj|31542354|ref|NP\_034 [LLTIDRYLAIVHA|Y|139|  
1906 RCKRQFYLYKGGC gj|97189858|sp|Q2I0M5|I [RCKRQFYLYKGGC|Y|1  
1907 YSKNTDYTELHQQ gj|32469749|sp|Q8TBA6|I [YSKNTDYTELHQQ|Y|4:  
1908 DLVSCAYQVARGM gj|119602968|gb|EAW82 [DLVSCAYQVARGM|Y|6  
1909 KTPAILTYTSGLR gj|74759932|sp|Q8N684|I [KTPAILTYTSGLR|Y|72|  
1910 LMARALYDNVPEC gj|8134360|sp|Q14511|C [LMARALYDNVPEC|Y|1:  
1911 SLETLTYKPVDRV gj|143811366|sp|P11274 [SLETLTYKPVDRV|Y|64  
1912 TSSTVQYSTVVHS gj|729833|sp|P40189|IL6 [TSSTVQYSTVVHS|Y|7  
1913 GGYGYGYGRSRDY gj|1710620|sp|P98179|RI [GGYGYGYGRSRDY|Y|  
1914 LLREETYDVPPAF gj|8134339|sp|P56945|B [LLREETYDVPPAF|Y|32  
1915 EEGYQDYEPEA gj|586067|sp|P37840|SY [EEGYQDYEPEA|Y|136|  
1916 FVGTLQYLAPELL gj|14285497|sp|O14920|I NA  
1917 HTTQGVYDIPPSS gj|8134360|sp|Q14511|C NA  
1918 KQPYTEYISTRWY gj|41017258|sp|Q9UQ07 [KQPYTEYISTRWY|Y|1  
1919 CSPQPEYVNPQPDV gj|119533|sp|P04626|ER [CSPQPEYVNPQPDV|Y|1  
1920 RGLQGTQYQDVGSL gj|547896|sp|P11912|CD [RGLQGTQYQDVGSL|Y|2  
1921 SVQNPVYHNQPLN gj|2811086|sp|P00533|E [SVQNPVYHNQPLN|Y|1  
1922 TLGGNPYPGIPPE gj|547807|sp|P07949|RE NA  
1923 YDQTNPYTDVRRR gj|85681902|sp|Q9UPU5 [YDQTNPYTDVRRR|Y|1

|                     |                                             |
|---------------------|---------------------------------------------|
| 1924 EKVSGDYGHPVYI  | gi 2494367 sp Q15768 E [EKVSGDYGHPVYI Y 31  |
| 1925 IEDEDYYKASVTR  | gi 3183003 sp Q14289 F, [IEDEDYYKASVTR Y 58 |
| 1926 PGGSDNYGSLSRV  | gi 14916543 sp O60716 C [PGGSDNYGSLSRV Y 2  |
| 1927 TAMRA          | contol_spot NA                              |
| 1928 IgM            | contol_spot NA                              |
| 1929 pY             | contol_spot NA                              |
| 1930 TAMRA          | contol_spot NA                              |
| 1931 IgM            | contol_spot NA                              |
| 1932 pY             | contol_spot NA                              |
| 1933 DEGGEVYEDLMKA  | gi 12643372 sp Q9UKWZ NA                    |
| 1934 ARVSSGYVPPPVA  | gi 2497677 sp Q15942 Z' NA                  |
| 1935 RYEGRVYHYRINT  | gi 1168268 sp P42684 AI NA                  |
| 1936 TVEFMHYIAARA   | gi 21542165 sp O00541 I NA                  |
| 1937 IWKKEIYEESSW   | gi 20138899 sp O96007 I NA                  |
| 1938 KQERISYTPPESP  | gi 730927 sp P41212 ET' NA                  |
| 1939 HPATAEYEFANPS  | gi 6016268 sp Q16082 H NA                   |
| 1940 GADPNPYVKTYLL  | gi 152031652 sp O00443 NA                   |
| 1941 KPPYTDYVSTRWY  | gi 48428273 sp Q9UPZ9 [KPPYTDYVSTRWY Y 1    |
| 1942 KCDPAGYYCGFKA  | gi 46397659 sp P60900 F NA                  |
| 1943 SRNAAEYLLSSGI  | gi 85681908 sp P00519 / NA                  |
| 1944 PTPRSQYLSAEEN  | gi 47117044 sp O75581 I NA                  |
| 1945 RQLREQYDEKRSQ  | gi 60390262 sp O95453 I NA                  |
| 1946 SYHPSAYS PFHFQ | gi 17380231 sp Q9UKK3 NA                    |
| 1947 AYADSYYYEDGGM  | gi 73619722 sp Q8IVM0  NA                   |
| 1948 RGFGFVYFQNHDA  | gi 8134660 sp Q13151 R NA                   |
| 1949 RAYADSYYYEDGG  | gi 73619722 sp Q8IVM0  NA                   |
| 1950 LFQPVQYGQKPEG  | gi 55976571 sp Q96L91 I NA                  |
| 1951 YDEQSNDYDQHDH  | gi 8928305 sp Q92804 R NA                   |
| 1952 YAVQAKYGDYNKE  | gi 464541 sp P35241 RA NA                   |
| 1953 IVRSNHYPDEE    | gi 85700443 sp Q07157 ; NA                  |
| 1954 KEKKYDYDNLPR   | gi 84028209 sp Q8IXK2 C NA                  |
| 1955 DQDINYIPAEDF   | gi 85396869 gb AAI0478  NA                  |
| 1956 GSGFYQYTVKKDK  | gi 83304988 sp O94856 I NA                  |
| 1957 FGGLVNYFKSKPV  | gi 6685982 sp O95721 S NA                   |
| 1958 GSHISGYATLRRG  | gi 82581557 sp Q70E73  NA                   |
| 1959 RNDSGTYLCAIS   | gi 145559515 sp Q15116 NA                   |
| 1960 MGATAVYELDTEK  | gi 3123165 sp O15541 R NA                   |
| 1961 AVRRACYGVLRFI  | gi 417719 sp P23396 RS NA                   |
| 1962 NSYPWPYGRQTAP  | gi 27805737 sp Q96GD4 [NSYPWPYGRQTAP Y 1    |
| 1963 GCTPLHYAASKNR  | gi 20532206 sp O75832 I NA                  |
| 1964 LLITGRYVEARNI  | gi 116242491 sp P35573 NA                   |
| 1965 KHINEVYYAKKKR  | gi 3219996 sp Q13627 D NA                   |
| 1966 DKNADGYIDLDEL  | gi 54042075 sp P63316 7 NA                  |
| 1967 SINTVTYEWAPPV  | gi 17380320 sp Q9UGI8  NA                   |
| 1968 ANSVASYENEEPA  | gi 119572412 gb EAW52 NA                    |
| 1969 IEWWDSYIIPNGF  | gi 37082334 sp O43395 I NA                  |
| 1970 GNRFEFYANPTKR  | gi 55977747 sp P52272 f NA                  |
| 1971 FLKAIGYLIPLMD  | gi 15214275 sp O75533 ; NA                  |
| 1972 DKLKELYGQVLYR  | gi 6094347 sp O76094 S NA                   |
| 1973 ARFCNRYPNIELS  | gi 56405304 sp O75643 I NA                  |
| 1974 AKREKEYVNIQTF  | gi 67477390 sp Q01968 C NA                  |
| 1975 CFYNSSYLNQRE   | gi 231458 sp P19652 A1, NA                  |

|                     |                                               |
|---------------------|-----------------------------------------------|
| 1976 YASLRHYLNLVTR  | gij 1172796 sp P10082 P` NA                   |
| 1977 GLQEHVYEEIGDA  | gij 116241250 sp Q02410 NA                    |
| 1978 PMLPNTYQPQPDS  | gij 8134339 sp P56945 B( NA                   |
| 1979 VVALYDYMPMNAN  | gij 547759 sp Q06187 BT NA                    |
| 1980 VVKREPYGKPV DV | gij 145559462 sp O14936 NA                    |
| 1981 LAGEIVYQPDGSA  | gij 108935822 sp Q15911 NA                    |
| 1982 KLSSGQYPNLETF  | gij 22653668 sp Q9UIF8 f NA                   |
| 1983 LQAQSDYEEIKTE  | gij 67476941 sp O14529 ( NA                   |
| 1984 DTESDFYEEIEVS  | gij 1352398 sp P49640 E` NA                   |
| 1985 MRLTISYLRVRKL  | gij 2498017 sp Q16665 H NA                    |
| 1986 APEAPVYANLSSY  | gij 135308 sp P17535 JUI NA                   |
| 1987 GTDSWVYPNISIP  | gij 13959682 sp Q16281 ( NA                   |
| 1988 DVKFKNYLIPKGM  | gij 306327 gb AAA02630. NA                    |
| 1989 ILLLVIIYTAFTP  | gij 26006810 sp Q9H252  NA                    |
| 1990 FFAPSLYIIP LGI | gij 6225708 sp O15403 M NA                    |
| 1991 MRDVDMYINLFHD  | gij 1709292 sp P55011 S` NA                   |
| 1992 MARFYTYINPAEI  | gij 1172435 sp P46059 S` NA                   |
| 1993 EDAANNYARGHYT  | gij 119591124 gb EAW70 NA                     |
| 1994 SVKDIQYLKDSL A | gij 1171955 sp P42338 PI NA                   |
| 1995 STENQSYAKHSAN  | gij 116242614 sp Q96RT` NA                    |
| 1996 PCLQGYTAAELK   | gij 51315841 sp Q14435 ( NA                   |
| 1997 TFPNLDYSECCLF  | gij 134047802 sp Q9BYX` NA                    |
| 1998 LEHLICYSFQVAK  | gij 9087218 sp P35968 V( [LEHLICYSFQVAK Y 10( |
| 1999 H2:17          | contol_spot NA                                |
| 2000 H6:17          | contol_spot NA                                |
| 2001 NFSWRGYAQMAPV  | gij 126302563 sp O15230 NA                    |
| 2002 TDSCDPYFMLNNV  | gij 27151691 sp Q9UP95  NA                    |
| 2003 ERRESLYAHHAQV  | gij 122890477 emb CAM1 NA                     |
| 2004 LQPCTAYVPVYPV  | gij 23821870 sp Q99946 I NA                   |
| 2005 VIYCDQYASLIPV  | gij 38503353 sp Q8NFU1 NA                     |
| 2006 SAAKTYYMSGGLQ  | gij 134044259 sp P11177 NA                    |
| 2007 RFVEFYWDSYWV   | gij 3287921 sp O43280 T  NA                   |
| 2008 YRCELLYEGPPDD  | gij 119172 sp P13639 EF; NA                   |
| 2009 IASPSKYVYILYV  | gij 119623143 gb EAX027 NA                    |
| 2010 LRSDCFYEQPDED  | gij 90185249 sp Q9BYK8  NA                    |
| 2011 YFSRDAYWEKLYV  | gij 547807 sp P07949 RE NA                    |
| 2012 EPEEVQYKKSTAW  | gij 150456451 ref NP_06( NA                   |
| 2013 LSFGESYDNSKSW  | gij 119608751 gb EAW88 NA                     |
| 2014 LILECKYVKKPLQ  | gij 68565242 sp Q8WW1` NA                     |
| 2015 LLKTKYGDRGNQ   | gij 17366458 sp Q14573 I NA                   |
| 2016 LPDELLYGRAGYL  | gij 47116933 sp Q9NS86  NA                    |
| 2017 LRSDDIYNQVSAY  | gij 2495719 sp Q12768 S` NA                   |
| 2018 RGLQEGYENSRCY  | gij 134035341 sp Q9C0C` NA                    |
| 2019 DIDENAYAKVCLY  | gij 6174930 sp Q13200 P` NA                   |
| 2020 EFQDELYKNTPKY  | gij 119585105 gb EAW64 NA                     |
| 2021 QADMTKYLEGSLY  | gij 147668009 sp Q8N6K` NA                    |
| 2022 VLQWSDYEIVRLQ  | gij 13633364 sp O14966 I NA                   |
| 2023 AQSGEDYDSFLMY  | gij 13638154 sp P16144 I NA                   |
| 2024 KLGYPYANPPNY   | gij 6686059 sp O60507 T  NA                   |
| 2025 TCTEGKYGIHCDQ  | gij 145559531 sp Q8WW` NA                     |
| 2026 FCQRELYEDSLLD  | gij 143811449 sp Q96EQ; NA                    |
| 2027 KKHFD SYIETALD | gij 119576332 gb EAW55 NA                     |

|      |                |                                             |
|------|----------------|---------------------------------------------|
| 2028 | AAAEWKYVAMVMD  | gi 113071 sp P02708 AC NA                   |
| 2029 | KTSMMSGYIPSYLD | gi 135705 sp P10827 TH. NA                  |
| 2030 | HLECARYMDVREA  | gi 7020152 dbj BAA9101. NA                  |
| 2031 | DFSKQPYIVSAAE  | gi 109896166 sp Q3MJ1. NA                   |
| 2032 | FGRSEQYRQVASP  | gi 20178334 sp O95409 . NA                  |
| 2033 | NPLEYKYKNGASP  | gi 56404632 sp Q8TAT5  NA                   |
| 2034 | YEAFFEGYDSIDSP | gi 20978543 sp O00231 I NA                  |
| 2035 | LSCEGRYERGRAE  | gi 68565596 sp Q8IZL2 I NA                  |
| 2036 | EQSGTIYLQHADE  | gi 134047855 sp P37198 NA                   |
| 2037 | SYGDSLYYNNAYG  | gi 62511089 sp Q9BWF3 NA                    |
| 2038 | ILSDEIYCPPETA  | gi 125987826 sp P15311 NA                   |
| 2039 | LDRMAKYEISALE  | gi 81170632 sp Q6NV75  NA                   |
| 2040 | IPGATGYEENTYL  | gi 21753422 dbj BAC043 NA                   |
| 2041 | KALDTSYVILPTA  | gi 10719900 sp O14514 I NA                  |
| 2042 | ARSLDKYDIICME  | gi 133021 sp P18124 RL NA                   |
| 2043 | <<Marker>>     | control_spot NA                             |
| 2044 | TASTSYEEAAGTA  | gi 132518 sp P22670 RF. NA                  |
| 2045 | ASDMSPYVRKTAA  | gi 18202497 sp Q13367 . NA                  |
| 2046 | MLGKALYENMLVE  | gi 67462009 sp Q15386 I NA                  |
| 2047 | YYADTIYTSAGVE  | gi 134053883 ref NP_99. NA                  |
| 2048 | GREATKYVRWIAF  | gi 122063373 sp Q8NHV NA                    |
| 2049 | LDDNFYYQSMRYE  | gi 116242735 sp Q8IV42 NA                   |
| 2050 | LQHEYPYEDHLWL  | gi 119575395 gb EAW55 NA                    |
| 2051 | FHFEGSYDSISKA  | gi 145617724 ref ZP_017 NA                  |
| 2052 | IAEELLYLRVVRG  | gi 32364694 gb AAP8038 NA                   |
| 2053 | SDWDSPYLDMELA  | gi 51702148 sp Q9H987  NA                   |
| 2054 | CIYEFYFYSNIDKP | gi 74708186 sp Q5TKA1  NA                   |
| 2055 | EHCGAAYEDFNIP  | gi 3192971 gb AAC19168 NA                   |
| 2056 | GPPEPPYSFHQVT  | gi 5921785 sp O43525 K NA                   |
| 2057 | KEFDPKYAHIQVT  | gi 32469767 sp Q96BY6  NA                   |
| 2058 | DPDESSYFVIGAV  | gi 10719903 sp O60241 I NA                  |
| 2059 | FSKDPDYIVVPYT  | gi 332129 gb AAA46542. NA                   |
| 2060 | MDEKTLYLALGAV  | gi 2833247 sp Q13797 IT NA                  |
| 2061 | QVSSPIYDINYYT  | gi 1705896 sp P51681 C NA                   |
| 2062 | RGSRTGYVHIYDV  | gi 109892504 sp Q53GT NA                    |
| 2063 | CPDEGFYKSGKFV  | gi 46577655 sp P61081 L NA                  |
| 2064 | <<Marker>>     | control_spot NA                             |
| 2065 | NQFVPLYTDPQEV  | gi 543774 sp P35612 AD NA                   |
| 2066 | VGAWGDYDDSAFV  | gi 113413200 ref XP_93. NA                  |
| 2067 | ALPPTDYDRSPFV  | gi 7676156 sp O00482 N NA                   |
| 2068 | GFSGEQYVLEKGV  | gi 74750904 sp Q8N1P7  NA                   |
| 2069 | KLVQIEYALAAVA  | gi 130850 sp P25787 PS. [KLVQIEYALAAVA Y 24 |
| 2070 | TVEVDLYTAKGLF  | gi 20981682 sp P09104 E [TVEVDLYTAKGLF Y 25 |
| 2071 | DTAEQVYISSLAL  | gi 51701716 sp O00487 I NA                  |
| 2072 | IDPTGTYHGSDSL  | gi 119608775 gb EAW88 [IDPTGTYHGSDSL Y 36   |
| 2073 | TGAKNLYIISVKG  | gi 51338639 sp P62829 F NA                  |
| 2074 | GPYSKQYAGYDYS  | gi 74760683 sp Q969M3  [GPYSKQYAGYDYS Y 3   |
| 2075 | HFIKDEYKENPLF  | gi 55976292 sp Q08683 . NA                  |
| 2076 | LRMKGDYVLGGLF  | gi 62299063 sp Q7RTX0 NA                    |
| 2077 | VESKNAYGITPLF  | gi 20531999 sp Q96Q27  NA                   |
| 2078 | GRESSGYLRLAFH  | gi 114607680 ref XP_518 NA                  |
| 2079 | DSHMDTYEQGVLF  | gi 115311843 sp Q5JRX. NA                   |

|                     |                                             |
|---------------------|---------------------------------------------|
| 2080 IQSDFIYFRKGPF  | gi 71891697 dbj BAA864 NA                   |
| 2081 NTSSYEYTDVPFH  | gi 67477354 sp O95897 I NA                  |
| 2082 YCKWPEYQRGGFH  | gi 6686252 sp Q99765 Y NA                   |
| 2083 ILEHLEYADEAEA  | gi 74761513 sp Q9H7X2  NA                   |
| 2084 GRRKVDYILVYHH  | gi 74708278 sp Q5XXA6 NA                    |
| 2085 <<Marker>>     | contol_spot NA                              |
| 2086 TVIKAKYAEVAKH  | gi 119579378 gb EAW58 NA                    |
| 2087 KLPDDHYQEKTAM  | gi 74750502 sp Q86WG€ NA                    |
| 2088 QIKSLQYSNTGDM  | gi 119576364 gb EAW55 NA                    |
| 2089 NDEHTSYGETGVP  | gi 125991837 sp Q9NZJ( NA                   |
| 2090 SEELTKYKIVTYL  | gi 20137579 sp Q9Y239  NA                   |
| 2091 KWEEIPYVQAFMA  | gi 21751026 dbj BAC038 NA                   |
| 2092 VPSKEAYCAYAI   | gi 2499523 sp Q13183 S NA                   |
| 2093 LNEEGGYHQIGPA  | gi 119569260 gb EAW48 NA                    |
| 2094 QGSEATYESGFVI  | gi 119572311 gb EAW51 NA                    |
| 2095 DGRSQDYINDAAK  | gi 115556 sp P21941 MA NA                   |
| 2096 GLEKTHYNSTSWI  | gi 30315933 sp Q8TF62  NA                   |
| 2097 LWRKDKYDCLIWI  | gi 729367 sp P40879 S2( NA                  |
| 2098 QSNKEAYVISLYI  | gi 20455347 sp O95922  NA                   |
| 2099 HVGESLYAIVLCK  | gi 71152986 sp Q8TBM7 NA                    |
| 2100 CRSFSLYVSCNCC  | gi 24370915 emb CAC85 NA                    |
| 2101 NIGKGSYAIPGDC  | gi 3024670 sp Q15831 S NA                   |
| 2102 NGREAEYSDKHGQ  | gi 19860819 sp P54760 E NA                  |
| 2103 LFFDDSYGFYPGQ  | gi 134035341 sp Q9C0C NA                    |
| 2104 VFMSVLYCQIGNK  | gi 116589 sp P19075 TSI NA                  |
| 2105 KVAKVEYVRKKPK  | gi 129719 sp P04085 PD NA                   |
| 2106 <<Marker>>     | contol_spot NA                              |
| 2107 STFVEGYSSNYEL  | gi 90110039 sp Q92570 I NA                  |
| 2108 TRPNTDYSCGGFL  | gi 85687556 sp Q9UGM€ NA                    |
| 2109 TRVAPAYAKMGEM  | gi 27735161 sp P17342 / NA                  |
| 2110 CSFKCSYVVTNGL  | gi 1172027 sp P43490 N NA                   |
| 2111 GGENTAYMSNGGL  | gi 12643949 sp Q9Y2T1  NA                   |
| 2112 HLEEVVYNQLNGL  | gi 143811393 sp Q9HCQ NA                    |
| 2113 RQSKELYGTWEML  | gi 22256935 sp Q96TA1  NA                   |
| 2114 VTVKETYCSVTNL  | gi 119582843 gb EAW62 NA                    |
| 2115 QPPGGDYQQPPPL  | gi 88909269 sp Q86UL8  NA                   |
| 2116 MLEEEDYPGAIQL  | gi 119597226 gb EAW76 NA                    |
| 2117 HKPDEIYGMIERL  | gi 33301371 sp Q86U44  NA                   |
| 2118 EESDADYDYQNRL  | gi 60416383 sp P12259 F NA                  |
| 2119 AYKESTYAKGNM   | gi 113422349 ref XP_93< NA                  |
| 2120 ENGCEEYGIMCPM  | gi 74762527 sp Q8N573  NA                   |
| 2121 AGYGDIYLNAGPM  | gi 66774048 sp Q14004 ( NA                  |
| 2122 NVMMGPHYRQDLLA | gi 21903479 sp P18206 \ NA                  |
| 2123 PDVLEYKNDHAK   | gi 90180201 sp Q13480 ( NA                  |
| 2124 PIQEANYVPMTPG  | gi 90180201 sp Q13480 (PIQEANYVPMTPG Y 47   |
| 2125 DEVYSKYYPVPC   | gi 41019536 sp P51692 € NA                  |
| 2126 WGLAEFYHPGQEY  | gi 55977123 sp P68400 ( NA                  |
| 2127 <<Marker>>     | contol_spot NA                              |
| 2128 YFLDDQYTSSSGA  | gi 1174630 sp P42680 TI NA                  |
| 2129 YIEDEDYYKASVT  | gi 3183003 sp Q14289 F, [YIEDEDYYKASVT Y 57 |
| 2130 YVDPHTYEDPNQA  | gi 125333 sp P29317 EP [YVDPHTYEDPNQA Y 5   |
| 2131 YVLDDQYVSSVGT  | gi 1705489 sp P51813 BI [YVLDDQYVSSVGT Y 5  |

|                     |                                             |
|---------------------|---------------------------------------------|
| 2132 IKLMEKYHVEAEE  | gi 9626575 ref NP_04086 NA                  |
| 2133 INNIDYYKKTNG   | gi 119569729 gb EAW49 NA                    |
| 2134 IYKDPDYVRKGS   | gi 1718189 sp P35916 V NA                   |
| 2135 APGMKVYIDPFTY  | gi 76803655 sp P54753 E [APGMKVYIDPFTY Y 60 |
| 2136 KAYGNGYSSNGNT  | gi 114765 sp P07550 AD NA                   |
| 2137 KKTFFASYMPQFQT | gi 116242617 sp P48357 [KKTFFASYMPQFQT Y 1  |
| 2138 VHVNATYVNVKCV  | gi 125484 sp P08581 ME [VHVNATYVNVKCV Y 1:  |
| 2139 NGNNYVYIDPTQL  | gi 125472 sp P10721 KIT [NGNNYVYIDPTQL Y 56 |
| 2140 ESTNHIYSLANC   | gi 125472 sp P10721 KIT [ESTNHIYSLANC Y 93  |
| 2141 PTAGALYSGSEGD  | gi 134876 sp P11831 SR NA                   |
| 2142 VEEEPVYEAPEP   | gi 123557 sp P14317 HC [VEEPPVYEAPEP Y 36   |
| 2143 MLRLQDYEEKTKK  | gi 125987826 sp P15311 [MLRLQDYEEKTKK Y 3:  |
| 2144 TLSEESYKDSTLI  | gi 51702210 sp P62258 1 NA                  |
| 2145 EEAEPPYEEATER  | gi 112927 sp P05067 A4_ NA                  |
| 2146 IFKSSCYIDVRWF  | gi 91208254 sp Q494W8 NA                    |
| 2147 KNPKNPYEESSRD  | gi 119226 sp P01133 EG NA                   |
| 2148 <<Marker>>     | contol_spot NA                              |
| 2149 GVESEFYLAMNKE  | gi 122756 sp P21781 FG NA                   |
| 2150 TQDGPLYVIVEYA  | gi 119583714 gb EAW63 NA                    |
| 2151 TLQQAIEYFLSFV  | gi 116242694 sp Q9Y3B8 NA                   |
| 2152 HTGEKPYACLECG  | gi 74757437 sp Q6DD87 [HTGEKPYACLECG Y 1:   |
| 2153 ATREGDYVLFHHE  | gi 116241237 sp P53396 NA                   |
| 2154 MKNLTQYEQKKAH  | gi 60389833 sp Q8IZD4 I NA                  |
| 2155 EHALLAYTLGVKQ  | gi 156056334 ref XP_001 [EHALLAYTLGVKQ Y 14 |
| 2156 KRLTHVYDLCKGK  | gi 133326 sp P24928 RP [KRLTHVYDLCKGK Y 1:  |
| 2157 ERYTEFYHVPHTS  | gi 47605572 sp Q96HC4 [ERYTEFYHVPHTS Y 2:   |
| 2158 KIVDNGYGYVSNG  | gi 20141641 sp P49589 5 NA                  |
| 2159 HFPLATYAPVISA  | gi 119591124 gb EAW70 [HFPLATYAPVISA Y 27:  |
| 2160 SKFDTIYQILLKK  | gi 12585547 sp Q14258 [SKFDTIYQILLKK Y 278  |
| 2161 HTGEKPYECIKCG  | gi 91208389 sp Q2M3W8 [HTGEKPYECIKCG Y 2:   |
| 2162 IDDESDFASDSN   | gi 116242828 sp Q15650 [IDDESDFASDSN Y 28   |
| 2163 ARIQRAYNHYFDL  | gi 42560556 sp Q9NZW8 [ARIQRAYNHYFDL Y 50   |
| 2164 HSGEKPYECVECG  | gi 14548338 sp O43296 [HSGEKPYECVECG Y 5    |
| 2165 GGEDPLYVARRLV  | gi 73622085 sp Q96S55 1 NA                  |
| 2166 ENTEDQYSLVEDD  | gi 118572681 sp P27986 [ENTEDQYSLVEDD Y 6:  |
| 2167 YTTDFIYQLYSEE  | gi 1346355 sp Q01813 K [YTTDFIYQLYSEE Y 65: |
| 2168 DPGAAPYLKTKFI  | gi 21618338 ref NP_003 NA                   |
| 2169 <<Marker>>     | contol_spot NA                              |
| 2170 YGGGGQYFAKPRN  | gi 133254 sp P09651 RO [YGGGGQYFAKPRN Y 3:  |
| 2171 TPDHVYARSKTA   | gi 56749614 sp Q6NZI2 I [TPDHVVYARSKTA Y 3: |
| 2172 PSQDSLSDPLDS   | gi 17366642 sp Q99704 I [PSQDSLSDPLDS Y 31  |
| 2173 HVPAGLYRIRKGV  | gi 45645212 sp Q9Y2X7 I [HVPAGLYRIRKGV Y 55 |
| 2174 QRKKPLYWDLYEH  | gi 17366642 sp Q99704 I [QRKKPLYWDLYEH Y 3  |
| 2175 PLPNCTYATRQAI  | gi 74742134 sp Q5JTD0 NA                    |
| 2176 LTPENLYDVHGPG  | gi 1708905 sp P53338 M NA                   |
| 2177 ILENNEYPDIVTW  | gi 730744 sp P38889 SK NA                   |
| 2178 MKNFEDYSNRLPS  | gi 729290 sp P21657 DA NA                   |
| 2179 EFEEDYSINRVL   | gi 731945 sp P39529 YJ NA                   |
| 2180 TSSKKKYLDHILL  | gi 1173439 sp P46954 SI NA                  |
| 2181 YNEEQNYSEARKK  | gi 88984071 sp P17106 C NA                  |
| 2182 VMSVSSYMDNHNH  | gi 1169823 sp P04386 G NA                   |
| 2183 YKSAPIYEIINKE  | gi 1169136 sp P41817 C NA                   |

|      |                |                            |
|------|----------------|----------------------------|
| 2184 | NNSNNSYYSNED   | gi 3024551 sp Q12224 R NA  |
| 2185 | KRVNDSYDSPLSG  | gi 41016991 sp Q03063 I NA |
| 2186 | KIYQPSYLSINNE  | gi 6685617 sp Q99683 M NA  |
| 2187 | KPSNILYVDESGD  | gi 147906429 ref NP_00 NA  |
| 2188 | MLEGVKYLCPAA   | gi 74752929 sp Q9NRW NA    |
| 2189 | ETEARKYVRNSRM  | gi 23831505 sp O43709  NA  |
| 2190 | <<Marker>>     | contol_spot NA             |
| 2191 | LGRWPGYLNGGRM  | gi 74758793 sp Q6ZS27  NA  |
| 2192 | RICMWKYLVDVHSM | gi 118764281 gb AAI281 NA  |
| 2193 | SSRNEDYPRTCRM  | gi 146345419 sp Q5XUX NA   |
| 2194 | AKSEEAYAEDSVM  | gi 52783206 sp Q8NC51 NA   |
| 2195 | DYPDNTYVSSSEN  | gi 74714811 sp Q8N3A8  NA  |
| 2196 | FCRKPIYLMNNFN  | gi 119581094 gb EAW60 NA   |
| 2197 | KRFIGDYERNAGN  | gi 61563659 gb AAX467 NA   |
| 2198 | LMEKTGYNMVQEN  | gi 119625308 gb EAX04 NA   |
| 2199 | QEFVDAYVDYIFN  | gi 74707832 sp Q5GLZ8  NA  |
| 2200 | AECKTSYESRSGN  | gi 34364940 emb CAE46 NA   |
| 2201 | ASVMQEYTSQSGGV | gi 130850 sp P25787 PS NA  |
| 2202 | NMLMERYRVESDL  | gi 149395322 gb ABR27 NA   |
| 2203 | LLVAEDYMIVYLN  | gi 38257451 sp Q86WG NA    |
| 2204 | RRCNIEYSSTGLN  | gi 74733564 sp Q9H2Q1 NA   |
| 2205 | VKKCTRYIDCDLN  | gi 1168340 sp P45381 A NA  |
| 2206 | CGKEGKYIHFTPN  | gi 5729769 ref NP_0065 NA  |
| 2207 | NGGDHRYVNNYTN  | gi 116242825 sp Q14134 NA  |
| 2208 | VVHLDDYNDHAPQ  | gi 2493422 sp Q08554 D NA  |
| 2209 | DVCSIDYISGNPQ  | gi 152031705 sp Q8NHU NA   |
| 2210 | GLGESLYILVGQQ  | gi 143811416 sp P29376 NA  |
| 2211 | LRENGTYPDAEQQ  | gi 21748502 dbj BAC033 NA  |
| 2212 | RHSGPPYVGPPQQ  | gi 48428276 sp O43432 I NA |
| 2213 | IGVKSAYVSYDVQ  | gi 109895058 sp Q9NUV NA   |
| 2214 | LYLEDFYVTQAYQ  | gi 143583359 sp Q86VE NA   |
| 2215 | RIKKPDYKVAYVQ  | gi 68566020 sp Q16540 I NA |
| 2216 | CLDDDTYMKDLYQ  | gi 74723724 sp Q8N392  NA  |
| 2217 | FGSKDYYWTHQAR  | gi 74706096 sp O96028 I NA |
| 2218 | LDDSPEYGLHGYQ  | gi 51316029 sp Q8NCQ5 NA   |
| 2219 | GYACPYHNSKDR   | gi 47117622 sp Q9C0B0  NA  |
| 2220 | IPEMEGYMKAEVA  | gi 119591469 gb EAW71 NA   |
| 2221 | RDKWDQYKGVGVA  | gi 119226260 ref NP_00 NA  |
| 2222 | AKNKDGYTPLLVA  | gi 22653655 sp Q92527  NA  |
| 2223 | EAPEVLYWAVPVA  | gi 119620941 gb EAX00 NA   |
| 2224 | TLETEHYHPGGG   | gi 119624572 gb EAX04 NA   |
| 2225 | DRRDDAYWPEGKR  | gi 38372432 sp Q14151  NA  |
| 2226 | GAAMAELYKAGKR  | gi 74728990 sp Q8N5F7  NA  |
| 2227 | ISNAEYENIPIR   | gi 56405304 sp O75643 I NA |
| 2228 | LLFENQYYPNGIR  | gi 74748429 sp Q6DN90 NA   |
| 2229 | VESEQQYFEIEKR  | gi 1730009 sp P12270 TI NA |
| 2230 | ECKEGRYLEIEFC  | gi 21264084 sp O00300  NA  |
| 2231 | LFACEEYAQNALR  | gi 124020999 sp Q6NXG NA   |
| 2232 | RVAESTYQHHPKR  | gi 41017505 sp Q9HCL0 NA   |
| 2233 | SWSMGAYKSSTIC  | gi 81175180 sp Q9P2G3 NA   |
| 2234 | NLPLPDYVHPQLR  | gi 74745673 sp Q5T9G4 NA   |
| 2235 | DAHDDSYTCECPR  | gi 119591638 gb EAW71 NA   |

|      |                |                                            |
|------|----------------|--------------------------------------------|
| 2236 | PIYGTYYVDHINR  | gi 88909269 sp Q86UL8  NA                  |
| 2237 | LVPESDYTNNVVR  | gi 417269 sp P28300 LY  NA                 |
| 2238 | AGFTTIYKWNGNG  | gi 32469669 sp O95970 I NA                 |
| 2239 | EARQDGYGDRTL   | gi 18202503 sp Q15223 I NA                 |
| 2240 | GIPEGPYSEGGNG  | gi 110808200 sp Q6Y2X  NA                  |
| 2241 | LLFDDGYECDVLG  | gi 8928568 sp Q12888 T  NA                 |
| 2242 | QYVKELYEQECNG  | gi 15214192 sp Q9UKL6  NA                  |
| 2243 | LPSDTSYSEQEDS  | gi 150383497 sp Q9UGL NA                   |
| 2244 | SLVGEEYKSIPCS  | gi 74753030 sp Q9NWU  NA                   |
| 2245 | ASGAEPYIKNPDS  | gi 32469767 sp Q96BY6  NA                  |
| 2246 | GAVEECYVSELDS  | gi 32129530 sp Q14315 I NA                 |
| 2247 | LLYKTDYSNDFDS  | gi 119591469 gb EAW71 NA                   |
| 2248 | TKDSDIYCTLNDS  | gi 116256077 sp Q9BYW NA                   |
| 2249 | HRQGHYMEMNFT   | gi 51702211 sp P63010 / NA                 |
| 2250 | IIQAEFYLNPDQS  | gi 122206 sp P01903 2D  NA                 |
| 2251 | TSADHLYVNVSEL  | gi 1345957 sp P48023 T  NA                 |
| 2252 | DKDLRHYLNLRFQ  | gi 88909269 sp Q86UL8  NA                  |
| 2253 | IFPQPNYVDM LIS | gi 37999836 sp Q9Y5G6 NA                   |
| 2254 | AAAAYANISWE    | gi 33112413 sp Q92823 I NA                 |
| 2255 | RLSGELYGRATAW  | gi 22001556 sp Q99999  NA                  |
| 2256 | IAANCIYLNIPNK  | gi 6831528 sp O94760 D NA                  |
| 2257 | KHATGNYIIIMDA  | gi 20137697 sp O60762 I NA                 |
| 2258 | NFHSFLYQPDWRF  | gi 585126 sp P37268 FD NA                  |
| 2259 | AVCFFSYLRVSQD  | gi 1730136 sp P51993 F  NA                 |
| 2260 | KVLGLKYEEIDCL  | gi 62901521 sp O94923  NA                  |
| 2261 | CTLWEAYANLHTA  | gi 1705489 sp P51813 BI NA                 |
| 2262 | VCEELTYEEIRD   | gi 3023733 sp Q16875 F  NA                 |
| 2263 | RVGTVGYMAPEVV  | gi 143811400 sp P32298 NA                  |
| 2264 | LQMFMWYLNPRQV  | gi 12643642 sp O75912 I NA                 |
| 2265 | DFEGFSYVNPQFV  | gi 125549 sp P17252 KP  [DFEGFSYVNPQFV Y 6 |
| 2266 | FTGTLQYMAPEII  | gi 116248533 sp Q6ZN1  NA                  |
| 2267 | FWGCDSYANLNTE  | gi 21542119 sp Q9BXB1 NA                   |
| 2268 | FLGATNYIYVLNE  | gi 125484 sp P08581 ME NA                  |
| 2269 | GKDYFDYINVGSW  | gi 1709020 sp P41594 M NA                  |
| 2270 | HNGVSYINLCQK   | gi 60416403 sp P11717  NA                  |
| 2271 | IMSKAAYMPMAAS  | gi 14423818 sp Q9NQN1 NA                   |
| 2272 | GESDGGYMDMSKD  | gi 129890 sp P09619 PG  [GESDGGYMDMSKD Y   |
| 2273 | MTGEDGYFTNLC   | gi 56405102 sp Q9UJ41  NA                  |
| 2274 | QARGSAYTDPHLC  | gi 119622563 gb EAX02  NA                  |
| 2275 | YRMDDVYKEPLKC  | gi 24211441 sp Q13443  NA                  |
| 2276 | PLPAEGYNKVGPG  | gi 9087156 sp Q14934 N NA                  |
| 2277 | GTFGTEYVFPEVL  | gi 134047954 sp O95498 NA                  |
| 2278 | CEFETLYKAFSNC  | gi 74757726 sp Q6ICH7  NA                  |
| 2279 | LSEADPYVILQLS  | gi 74750540 sp Q86XP0  NA                  |
| 2280 | QAKAEIYEMRPLS  | gi 20141419 sp Q12887  NA                  |
| 2281 | SFCNPVYQFINLS  | gi 134254443 ref NP_05  NA                 |
| 2282 | GEAEYVGPRLS    | gi 108884834 sp Q13895 NA                  |
| 2283 | QGSCLVYQNSAMS  | gi 27734555 sp Q96BD0  NA                  |
| 2284 | AKTKEKYVLGQNS  | gi 110816415 sp Q15464 NA                  |
| 2285 | SLREGLYFNPFYFP | gi 117759 sp P08574 CY NA                  |
| 2286 | GTEDESIEYRPRS  | gi 125991860 sp O94915 NA                  |
| 2287 | GMSDHRYGDGGSS  | gi 2500576 sp P55795 HI NA                 |



|                     |                                              |
|---------------------|----------------------------------------------|
| 2288 RNSEVKYTEACSS  | gj 114593243 ref XP_001NA                    |
| 2289 PCSRVEYVSSLSS  | gj 131573277 gb ABO33 NA                     |
| 2290 GTPEGYYMFIETS  | gj 46396459 sp Q8NFP4 NA                     |
| 2291 EFYMTIYEDSVAT  | gj 74762463 sp Q86XP1  NA                    |
| 2292 HHKKECYLNFDDT  | gj 116242623 sp Q9NS1  NA                    |
| 2293 GACGDSYAAQGWL  | gj 116242837 sp Q9Y2K  NA                    |
| 2294 TTFMCEYADETAT  | gj 45593462 sp P60568  NA                    |
| 2295 GFYEVDYASFHET  | gj 125987834 sp Q92806 NA                    |
| 2296 AEPFEGYLEPNET  | gj 67477390 sp Q01968  NA                    |
| 2297 VCPQAHYNMYPQN  | gj 41019536 sp P51692  [VCPQAHYNMYPQN Y 7    |
| 2298 YQSITHYRPVSAS  | gj 1706639 sp P50402 E  [YQSITHYRPVSAS Y 16  |
| 2299 SKDKDAYSSFGSR  | gj 73620957 sp O15523 I  [SKDKDAYSSFGSR Y 6  |
| 2300 EDEEYEMNRRRR   | gj 119534 sp P21860 ER [EDEEYEMNRRRR Y 1     |
| 2301 LNNGKFYVGVCAF  | gj 1172823 sp P43351 R  [LNNGKFYVGVCAF Y 1   |
| 2302 PGVASGYVSSADL  | gj 1345923 sp P32927 IL [PGVASGYVSSADL Y 7   |
| 2303 GTGGSVYTEDNDD  | gj 6094447 sp P55072 TI [GTGGSVYTEDNDD Y 7   |
| 2304 GPGGGDYAAMGAC  | gj 119534 sp P21860 ER [GPGGGDYAAMGAC Y      |
| 2305 RYYEGYYAAGPGY  | gj 74751663 sp Q93052 I  [RYYEGYYAAGPGY Y 3  |
| 2306 SSNGHVYEKLSSI  | gj 14548162 sp Q13224 I  [SSNGHVYEKLSSI Y 14 |
| 2307 TEPEPVYSMEAAD  | gj 2498954 sp Q14247 S  [TEPEPVYSMEAAD Y 4   |
| 2308 DDEDDSYLEPDSP  | gj 3023207 sp P78314 3E [DDEDDSYLEPDSP Y 1   |
| 2309 SSQRRSYAFETQA  | gj 134035020 sp Q7Z6I6 [SSQRRSYAFETQA Y 1    |
| 2310 VNEAPVYSVYSKL  | gj 71153548 sp O75886  [VNEAPVYSVYSKL Y 37   |
| 2311 KQVEELYHSLLEL  | gj 94730425 sp Q13813  NA                    |
| 2312 VQEAKEYKAEDV   | gj 147744565 sp P08107 [VQEAKEYKAEDV Y 5     |
| 2313 ASLESLYSACSMQ  | gj 6166186 sp Q13322 G [ASLESLYSACSMQ Y 6    |
| 2314 FANFSAYPSEEDM  | gj 67476728 sp P42566 E [FANFSAYPSEEDM Y 8   |
| 2315 KKSWEVYQGVQCQK | gj 2506481 sp P30411 BI [KKSWEVYQGVQCQK Y    |
| 2316 LSADSGYIIPLPD  | gj 129892 sp P16234 PG [LSADSGYIIPLPD Y 101  |
| 2317 QRKIKKYRLQQAQ  | gj 68067956 sp P05362 I  [QRKIKKYRLQQAQ Y 5  |
| 2318 RTALLNYENLPSL  | gj 71152057 sp Q8WU2  NA                     |
| 2319 VDSDNAYIGVTYK  | gj 129892 sp P16234 PG [VDSDNAYIGVTYK Y 98   |
| 2320 DDFDSDYENPDEH  | gj 82592659 sp Q8WV28 [DDFDSDYENPDEH Y 7     |
| 2321 TKDGWVYYANHTE  | gj 74725363 sp Q9NZC7 [TKDGWVYYANHTE Y 3     |
| 2322 ADERVDYVVVDQQ  | gj 90180201 sp Q13480  [ADERVDYVVVDQQ Y 6    |
| 2323 DPDNEAYEMPSEE  | gj 586067 sp P37840 SY [DPDNEAYEMPSEE Y 1    |
| 2324 AVENPEYLTPQGG  | gj 119533 sp P04626 ER [AVENPEYLTPQGG Y 1    |
| 2325 LDVLFYDSNTVK   | gj 143811432 sp Q13177 [LDVLFYDSNTVK Y 13    |
| 2326 YVNEPLYLNTFAN  | gj 3913590 sp Q15303 E NA                    |
| 2327 LIESELYFLIARY  | gj 97535778 sp Q9NSI6  NA                    |
| 2328 VTIDSSYDIAKIS  | gj 84028186 sp P36222  NA                    |
| 2329 PKGVLLYGPPGTG  | gj 148702336 gb EDL34  NA                    |
| 2330 DKHNCPYDYKAEA  | gj 25091738 sp O76080  NA                    |
| 2331 TPGDFSYAYQKPE  | gj 1170875 sp P46821 M NA                    |
| 2332 ACGTPGYVAPEVL  | gj 3122301 sp Q14012 K NA                    |
| 2333 TVSEENYMCRRFL  | gj 47116568 sp Q96EK6  NA                    |
| 2334 AECLDEYEDDEAG  | gj 66773935 sp Q96IZ0 F NA                   |
| 2335 NANSGYEYEAHPVT | gj 116242482 sp Q9UN8  NA                    |
| 2336 ITTNRFYGPQVNN  | gj 62291053 sp O00401  NA                    |
| 2337 DKEGDDYEVIPNS  | gj 30173386 sp Q9NTJ3  NA                    |
| 2338 KIVLQKYHTINGH  | gj 133257 sp P22626 RO NA                    |
| 2339 YDLSSKYYQTIGN  | gj 20978558 sp Q9UNM  NA                     |

|      |                 |                        |                       |
|------|-----------------|------------------------|-----------------------|
| 2340 | GADGGLYQIPLPS   | gi 17433253 sp Q9NZQ3  | NA                    |
| 2341 | FKKHGVYNPNKIF   | gi 6648067 sp P40926   | M NA                  |
| 2342 | LQVKTWYQNRMMK   | gi 13431329 sp Q9UMQ3  | NA                    |
| 2343 | ILDDSGYVSAYKN   | gi 28380040 sp Q9BW30  | NA                    |
| 2344 | RSEPDLYCDPRGT   | gi 20138951 sp Q13835  | I NA                  |
| 2345 | ERRDLQYITVSKE   | gi 12644018 sp P55196  | / NA                  |
| 2346 | VGSRLGYLPGKGT   | gi 1710032 sp P29375   | J/ NA                 |
| 2347 | ITLSAIKWITDN    | gi 12644465 sp Q92949  | I NA                  |
| 2348 | QAQPRQYYLKGLS   | gi 119575831 gb EAW55  | NA                    |
| 2349 | SEWKQKYEETQAE   | gi 3041707 sp P13535   | M NA                  |
| 2350 | SLEYSEYMTGKKL   | gi 74760971 sp Q96MM3  | NA                    |
| 2351 | AQWKTKYETDAIQ   | gi 13431717 sp Q9UKX3  | NA                    |
| 2352 | YRLYVIYKVPQVR   | gi 31077165 sp P09661  | F NA                  |
| 2353 | RHMDGMYGPPAKR   | gi 73921720 sp Q8NFD5  | NA                    |
| 2354 | YRKEPLYAAFPGS   | gi 42559872 sp Q9C0H9  | NA                    |
| 2355 | IRLKLVDKCDRS    | gi 3041727 sp Q07869   | P NA                  |
| 2356 | LKELEKYEQLPED   | gi 8928460 sp O75962   | T NA                  |
| 2357 | TAYEVCYGLVNDD   | gi 13638154 sp P16144  | I [TAYEVCYGLVNDD Y 1: |
| 2358 | REIQDNYPYLLIVKG | gi 148886692 ref NP_00 | NA                    |
| 2359 | DDLDPNYVLSSRV   | gi 125305 sp P06732    | KC NA                 |
| 2360 | HMYHSLYLKVKGN   | gi 51338661 sp P84098  | F NA                  |
| 2361 | RGGARRYACRGGG   | gi 1709254 sp P55055   | N NA                  |
| 2362 | SLEELGYEYMDVG   | gi 119534 sp P21860    | ER NA                 |
| 2363 | DMKYGIYAVENEH   | gi 126302613 sp Q9UEU  | NA                    |
| 2364 | HSYEDPYFDDR VH  | gi 20139104 sp Q99569  | I NA                  |
| 2365 | PADDHRYKFADNK   | gi 12644474 sp Q99593  | NA                    |
| 2366 | DEEDTYT KDLP I  | gi 17380291 sp Q92900  | I NA                  |
| 2367 | FEDKSAYALCTFA   | gi 30173120 sp Q9BY32  | NA                    |
| 2368 | FIRVVMYEGKKIM   | gi 117949802 sp P07996 | NA                    |
| 2369 | IFVERRYTAVVLN   | gi 24418367 sp Q9UPY3  | NA                    |
| 2370 | TFNVDMYEEIHRK   | gi 20981690 sp Q13098  | ( NA                  |
| 2371 | EGIKQFYINVERE   | gi 45645183 sp Q14240  | I NA                  |
| 2372 | FCGTIEYMAPDIV   | gi 37999482 sp O75582  | I NA                  |
| 2373 | PCGSAEYMAPEVV   | gi 90102033 sp Q9HBH9  | NA                    |
| 2374 | SCLNISYANVAGP   | gi 33516944 sp Q9UNW3  | NA                    |
| 2375 | HPYLEPYGLVYCV   | gi 27805644 sp Q9BU40  | NA                    |
| 2376 | DGFYYLYANICFR   | gi 12643360 sp O14788  | NA                    |
| 2377 | RLDPEAYGAPCAR   | gi 3914477 sp O43240   | K NA                  |
| 2378 | TGETCVYPNPANV   | gi 124056489 sp P02458 | NA                    |
| 2379 | RLLHSDYMNMTPR   | gi 115973 sp P10747    | CD [RLLHSDYMNMTPR Y 1 |
| 2380 | RSAWLPYPNP NPH  | gi 109939725 sp Q13591 | NA                    |
| 2381 | PFIKITYEEIPLP   | gi 5921793 sp O75503   | C NA                  |
| 2382 | NLQMLTYLNLSRN   | gi 49066056 sp Q9Y2L9  | NA                    |
| 2383 | MVRKEYPNLSTS    | gi 76803550 sp Q9BTX7  | NA                    |
| 2384 | ILPRSDYIIIPKS   | gi 2495717 sp Q12766   | S NA                  |
| 2385 | GLVDVLYTAVLDL   | gi 3024887 sp O15063   | K NA                  |
| 2386 | HKPSQSYLRVRNK   | gi 20140756 sp Q9BVV6  | NA                    |
| 2387 | NRTTENYPNAGLI   | gi 114062 sp P08519    | AP NA                 |
| 2388 | QKIEEAYGDVSGL   | gi 116241261 sp Q16720 | NA                    |
| 2389 | PVEILNYIIPSGD   | gi 145559458 sp Q9NYL1 | NA                    |
| 2390 | YELALKYL NIAFT  | gi 146345380 sp Q15878 | NA                    |
| 2391 | IFFFVSYIIISFL   | gi 119631737 gb EAX111 | NA                    |

|      |                |                            |
|------|----------------|----------------------------|
| 2392 | ITAIAYPNPYTR   | gi 20141247 sp P51793 C NA |
| 2393 | DPGERLYDLNMPA  | gi 127962 sp P16333 NC NA  |
| 2394 | IIDKEYYYTKKEEQ | gi 55976470 sp Q7L5N1  NA  |
| 2395 | KWLHNEYVRDLPV  | gi 51316565 sp O14795 I NA |
| 2396 | VRANTAYHLHQRL  | gi 116242614 sp Q96RT NA   |
| 2397 | VVACNLYPFVKTV  | gi 23831360 sp P31939 F NA |
| 2398 | LCKSADYMNLFHK  | gi 71153185 sp Q9UPW NA    |
| 2399 | G2:17          | contol_spot NA             |
| 2400 | G6:17          | contol_spot NA             |
| 2401 | NWDMTGYGSHSKV  | gi 21431782 sp Q9H2X6  NA  |
| 2402 | AAATDAYSQMQLV  | gi 14602658 gb AAH098 NA   |
| 2403 | ILKKNYYKSPNLV  | gi 11493437 gb AAG354 NA   |
| 2404 | NSTDLYANGNLV   | gi 119611339 gb EAW90 NA   |
| 2405 | AAFEPVYWLVDNV  | gi 37999852 sp Q969W1 NA   |
| 2406 | ISFDGIYANMRMV  | gi 52000732 sp Q99700  NA  |
| 2407 | AAFKAHYSSNPSG  | gi 91207142 sp Q9NT99  NA  |
| 2408 | PWGEVKYSTYGTG  | gi 119600767 gb EAW80 NA   |
| 2409 | ENCKDKYYNCNVV  | gi 119598279 gb EAW77 NA   |
| 2410 | PNYKWGYCSNTVV  | gi 48474987 sp Q9P2L0  NA  |
| 2411 | DSDAEGYVEGLDD  | gi 730318 sp P39687 AN NA  |
| 2412 | MNYKGRYEITAED  | gi 74752718 sp Q9H814  NA  |
| 2413 | DPRNEIYILFNPW  | gi 57015359 sp P22735  NA  |
| 2414 | FNPECLYVFPCQW  | gi 152125899 sp A0PJZ3 NA  |
| 2415 | KLREEGYLAYYLQ  | gi 3913541 sp Q99956 D NA  |
| 2416 | KNEVQDYVSVEYL  | gi 67461057 sp Q8NHP6 NA   |
| 2417 | TTMNLSYVFIPLW  | gi 47605551 sp Q9H2L4  NA  |
| 2418 | KRSEYIYGENQLQ  | gi 119607215 gb EAW86 NA   |
| 2419 | CTVEQIYEILKIY  | gi 2493531 sp Q14790 C NA  |
| 2420 | FNMEPSYDFLHIY  | gi 38604975 sp Q96PZ7  NA  |
| 2421 | LFEMNGYLDSAII  | gi 74751569 sp Q8WW2 NA    |
| 2422 | PYNMETYDQRAII  | gi 61813357 ref XP_598 NA  |
| 2423 | SQADLDYVVPQIY  | gi 61252289 sp Q8TEQ8 NA   |
| 2424 | AAWMAYYINHPLY  | gi 20177939 sp Q9NZ01  NA  |
| 2425 | SDIEGEYVPVEGD  | gi 32129852 sp Q9Y534  NA  |
| 2426 | ATGNEEYLINLID  | gi 119619494 gb EAW99 NA   |
| 2427 | EASKVIYTNGCID  | gi 74727485 sp Q86UF1  NA  |
| 2428 | KSQRSSYVSMRID  | gi 120940 sp P24046 GB NA  |
| 2429 | FLSWPDYGVPSA   | gi 1172724 sp P43378 P NA  |
| 2430 | SGMNHMYEDNDKD  | gi 85542144 sp Q562F6  NA  |
| 2431 | FYSASDYISDCWD  | gi 108936027 sp Q9Y2G NA   |
| 2432 | SEYAEGYESVSVD  | gi 119580509 gb EAW60 NA   |
| 2433 | CAPCDIYWCWPRP  | gi 28316330 dbj BAC569 NA  |
| 2434 | PACLPYQDMTQP   | gi 119591033 gb EAW70 NA   |
| 2435 | AINAEEYMSIIVG  | gi 115502124 sp Q6ZS8 NA   |
| 2436 | WADPGKYALMGAA  | gi 12644301 sp P51798 C NA |
| 2437 | DFGSEVYVWHGKE  | gi 57013034 sp O95425  NA  |
| 2438 | YSCEPSYDLRGAA  | gi 117310 sp P17927 CR NA  |
| 2439 | EPFPTIYVDSQKE  | gi 3915059 sp O43776 S NA  |
| 2440 | LTSSIDYSRLNKE  | gi 148612801 ref NP_05 NA  |
| 2441 | ACKSGGYKSKDYG  | gi 31559829 ref NP_853 NA  |
| 2442 | CMEDLIYEIYTVG  | gi 133021 sp P18124 RL NA  |
| 2443 | <<Marker>>     | contol_spot NA             |

|      |               |                         |                       |
|------|---------------|-------------------------|-----------------------|
| 2444 | GGDFNLYENMRCH | gi 20137929 sp Q9BPU6   | NA                    |
| 2445 | LREATEYEIELYG | gi 3915888 sp P24821 T  | NA                    |
| 2446 | VTYKPKYIEQQYG | gi 27734564 sp Q9NYB5   | NA                    |
| 2447 | ASFAPAYADLLSE | gi 123271 sp P14653 HX  | NA                    |
| 2448 | NGIEDAYILEATE | gi 74732251 sp Q96LW4   | NA                    |
| 2449 | DIFEEYELEQDVE | gi 119614736 gb EAW94   | NA                    |
| 2450 | LLDKEAYWTPVVL | gi 145559500 sp Q86W2   | NA                    |
| 2451 | LNTNLYYTSNALT | gi 62906890 sp Q92485   | NA                    |
| 2452 | SHPAEQYVSKLKT | gi 154089852 emb CAO    | NA                    |
| 2453 | IIIEPDYLGNNHP | gi 42518115 ref NP_964  | NA                    |
| 2454 | LGPTADYVFPDLT | gi 74734719 sp Q9NZ53   | NA                    |
| 2455 | PQFDGKYIHWNHP | gi 74743637 sp Q5SRI9   | NA                    |
| 2456 | EIEDHIYQELKST | gi 28380172 sp O75764   | NA                    |
| 2457 | TICNDLYIYDTRT | gi 119573049 gb EAW52   | NA                    |
| 2458 | HSNPAKYVSINST | gi 119606839 gb EAW86   | NA                    |
| 2459 | PYYPEYTCTPST  | gi 8134810 sp O60320 K  | NA                    |
| 2460 | CFEKDKYILQGVV | gi 130316 sp P00747 PLI | NA                    |
| 2461 | KDKVTIYENLDVT | gi 85542144 sp Q562F6   | NA                    |
| 2462 | TICKVSYASLADV | gi 119618163 gb EAW97   | NA                    |
| 2463 | FFSMVDYDEGTDV | gi 6166601 sp Q13454 T  | NA                    |
| 2464 | <<Marker>>    | contol_spot             | NA                    |
| 2465 | KSFEKYEVMFMDV | gi 13878337 sp Q13315   | NA                    |
| 2466 | EDMENLYVQLKLQ | gi 74729997 sp Q8NAS9   | NA                    |
| 2467 | YLSMSYYFDRDDV | gi 120516 sp P02794 FR  | NA                    |
| 2468 | GSDGEFYENHCEV | gi 62510692 sp Q8N475   | NA                    |
| 2469 | EDEEGPYYSALSG | gi 116242809 sp Q8WX    | NA                    |
| 2470 | IARGPCYSDNGSG | gi 74750770 sp Q8IYR6   | NA                    |
| 2471 | EDLPKSYDYDLII | gi 50403780 sp Q16881   | [EDLPKSYDYDLII Y 11 C |
| 2472 | CRADQQYECVAEI | gi 266423 sp Q00534 CD  | [CRADQQYECVAEI Y 1:   |
| 2473 | NEIKVVYLRCTGG | gi 266921 sp P30050 RL  | NA                    |
| 2474 | GSWAAIYQDIRHE | gi 131467 sp P18031 PT  | [GSWAAIYQDIRHE Y 2C   |
| 2475 | FEWEKGYSDRYGF | gi 77416521 sp Q6UWM    | NA                    |
| 2476 | MGHEDLYKRYGGF | gi 127976 sp P01213 PD  | NA                    |
| 2477 | DISDTIYPRNPAM | gi 12643387 sp P98170 E | NA                    |
| 2478 | DDFETFYEIWEKF | gi 34098756 sp Q9UQDC   | NA                    |
| 2479 | GTSTPEYNVKGIF | gi 28376972 sp O15484   | NA                    |
| 2480 | PYKNELYHWFPIF | gi 17366354 sp P58397   | NA                    |
| 2481 | SGNEIYMEPHVF  | gi 146330009 sp Q86UE   | NA                    |
| 2482 | LKESGSYMWIYVF | gi 12643959 sp Q9Y6L6   | NA                    |
| 2483 | SVEGWYVDSLYF  | gi 24636285 sp Q9HB15   | NA                    |
| 2484 | CTRGDKYPNDTGH | gi 74738220 sp Q6UXH8   | NA                    |
| 2485 | <<Marker>>    | contol_spot             | NA                    |
| 2486 | FKKEPVYQLPCGH | gi 21363047 sp O94941 I | NA                    |
| 2487 | GWEGGVYVQTCGH | gi 74762410 sp Q6ZT12   | NA                    |
| 2488 | YDCSDSYDKAPEI | gi 113418951 ref XP_94  | NA                    |
| 2489 | CFSKLDYAVAWFI | gi 2498228 sp Q16739 C  | NA                    |
| 2490 | RSPKLFYADHPFI | gi 20141241 sp P50454   | NA                    |
| 2491 | AEEMGGYFIINGI | gi 92090637 sp Q9H9Y6   | NA                    |
| 2492 | FLTCDEYEKKQHI | gi 2833252 sp Q14571 IT | NA                    |
| 2493 | PFENGQYLDIYGI | gi 88984537 sp Q7Z3B1   | NA                    |
| 2494 | RAFEQQYSPIPRI | gi 8134597 sp Q9Y5S8    | NA                    |
| 2495 | VTKEGEYIPLDQI | gi 119569494 gb EAW49   | NA                    |

|      |                |                                             |
|------|----------------|---------------------------------------------|
| 2496 | SSSESSYHGPSRI  | gj 61213482 sp Q6ZNL6  NA                   |
| 2497 | FFEMESYSVTQAG  | gj 728834 sp P39191 ALI NA                  |
| 2498 | FILSPNYVNGPSI  | gj 74762124 sp O95256 I NA                  |
| 2499 | YGYESIYAALRSI  | gj 74751821 sp Q96DW€ NA                    |
| 2500 | YDIKDDYTLRIKK  | gj 49036496 sp Q9HCK4 NA                    |
| 2501 | GNGEQQYVYLKDG  | gj 62896957 dbj BAD964 NA                   |
| 2502 | PCNEDGYMSCKDG  | gj 131086 sp P07225 PR NA                   |
| 2503 | SSDEIRYGVVALK  | gj 5921193 sp P12111 C NA                   |
| 2504 | DPMEDPYELKLLK  | gj 41019528 sp Q9Y6V0  NA                   |
| 2505 | SEGNVGYVQMRLK  | gj 27151474 sp Q14692 I NA                  |
| 2506 | <<Marker>>     | contol_spot NA                              |
| 2507 | LQYSPDYRNYLAL  | gj 68566054 sp Q8N5J4  NA                   |
| 2508 | CALESKYVKTIVCL | gj 73919921 sp Q14520 I NA                  |
| 2509 | PHSKGDYYSHNCL  | gj 11643585 gb AAG396: NA                   |
| 2510 | DFVDDSYLMKNL   | gj 6581091 gb AAF18452 NA                   |
| 2511 | LYFVLDYVNGGEL  | gj 28558166 sp Q9HBY8 NA                    |
| 2512 | IISMNLYSSICFL  | gj 2506481 sp P30411 BI NA                  |
| 2513 | GDSNDDYDSAGLL  | gj 119568243 gb EAW47 NA                    |
| 2514 | PSDKEGYSGVGLL  | gj 113984 sp P27695 AP NA                   |
| 2515 | GDYEILYWDVAGG  | gj 121945710 sp Q32P4 NA                    |
| 2516 | TVTDDDYAGFIFG  | gj 2623750 gb AAB86501 NA                   |
| 2517 | RQKSGRYVCVQLL  | gj 125950459 sp Q2KHT: NA                   |
| 2518 | EYYFPTYENDTLL  | gj 12230860 sp Q9NRM2 NA                    |
| 2519 | EFEDGMYANLGIG  | gj 48428678 sp Q9BYC2 NA                    |
| 2520 | GFRNSSYPETGHG  | gj 59803097 sp Q00537 I NA                  |
| 2521 | HPYPEDYGDIEIG  | gj 62298062 sp Q9Y4H2  NA                   |
| 2522 | NASDSSYRTPGIG  | gj 116241363 sp Q96M9  NA                   |
| 2523 | PKKSPIYVILVGG  | gj 55977754 sp O14524 I NA                  |
| 2524 | TAFDGPYCNHDIG  | gj 17433016 sp P78357 C NA                  |
| 2525 | TSAEPQYQPGDQT  | gj 125358 sp P09769 FG [TSAEPQYQPGDQT Y 5   |
| 2526 | VAENPEYLSEFSL  | gj 3913590 sp Q15303 E [VAENPEYLSEFSL Y 12  |
| 2527 | <<Marker>>     | contol_spot NA                              |
| 2528 | VDNEDIYESRHEI  | gj 1169745 sp P42685 FI NA                  |
| 2529 | VHNLDYKKTNG    | gj 120050 sp P22607 FG [VHNLDYKKTNG Y 6     |
| 2530 | VKDPTEYTGPESY  | gj 2833252 sp Q14571 IT NA                  |
| 2531 | VPTHSPYAQPSST  | gj 8928244 sp O15350 P [VPTHSPYAQPSST Y 9   |
| 2532 | GKDGRGYVPATIK  | gj 1174459 sp P42226 S [GKDGRGYVPATIK Y 6   |
| 2533 | GMSRDVYSTDYR   | gj 134035335 sp Q16288 [GMSRDVYSTDYR Y 7    |
| 2534 | GQRIYQYIQRIFY  | gj 3219996 sp Q13627 D [GQRIYQYIQRIFY Y 27  |
| 2535 | HDSEENYVPMNPN  | gj 90180201 sp Q13480 C [HDSEENYVPMNPN Y 5  |
| 2536 | HMEKHNYESAAEA  | gj 548377 sp Q05586 NM NA                   |
| 2537 | IHHIDYKKTNG    | gj 120046 sp P11362 FG [IHHIDYKKTNG Y 65    |
| 2538 | TANNPLYKEATST  | gj 125987835 sp P05106 [TANNPLYKEATST Y 77  |
| 2539 | LGFKRSYEEHIPY  | gj 33112647 sp P06213 I [LGFKRSYEEHIPY Y 13 |
| 2540 | DGLGLSYLSSHIA  | gj 121116 sp P06396 GE NA                   |
| 2541 | PVPTNLYGDFFTG  | gj 121116 sp P06396 GE NA                   |
| 2542 | MVKRRDYDLAAS   | gj 547807 sp P07949 RE [MVKRRDYDLAAS Y 11   |
| 2543 | QAFPVSYSSSGAR  | gj 547807 sp P07949 RE [QAFPVSYSSSGAR Y 6   |
| 2544 | IGNQHYPVGVGKP  | gj 3183518 sp Q05397 F, [IGNQHYPVGVGKP Y 86 |
| 2545 | VMLGASYWYRARL  | gj 29337230 sp Q13444 , [VMLGASYWYRARL Y 7  |
| 2546 | AQEENLYAAVKHT  | gj 37537910 sp Q8NHL6 NA                    |
| 2547 | PKEDPIYDEPEGL  | gj 17366642 sp Q99704 I [PKEDPIYDEPEGL Y 36 |

|                     |                         |                      |
|---------------------|-------------------------|----------------------|
| 2548 <<Marker>>     | contol_spot             | NA                   |
| 2549 LFDDPSYVNVQNL  | gj 17380299 sp P29353   | [LFDDPSYVNVQNL Y 4   |
| 2550 QAEENTYDEYENE  | gj 45382633 ref NP_9907 | [QAEENTYDEYENE Y 4   |
| 2551 EKSNLAYDIVQLP  | gj 6226869 sp P34932 H  | [EKSNLAYDIVQLP Y 89  |
| 2552 LYGNLHYLQTGRL  | gj 74753488 sp Q9Y3P8   | [LYGNLHYLQTGRL Y 9   |
| 2553 DYYEESYFTTRTY  | gj 1706639 sp P50402 E  | [DYYEESYFTTRTY Y 99  |
| 2554 LGASGDYADFQYL  | gj 116242733 sp P28070  | [LGASGDYADFQYL Y 1   |
| 2555 LYTLVTYVPVTTF  | gj 51702807 sp P62899 F | [LYTLVTYVPVTTF Y 10  |
| 2556 NSHDPSYFACLK   | gj 116242816 sp Q86T    | IO NA                |
| 2557 IKEKLCYVALDFE  | gj 89276723 gb ABD665   | [IKEKLCYVALDFE Y 21  |
| 2558 LSDSYNYSGTENL  | gj 50401753 sp Q7Z3T8   | [LSDSYNYSGTENL Y 22  |
| 2559 INQEGEYIKMFMR  | gj 18202954 sp Q9HC35   | [INQEGEYIKMFMR Y 22  |
| 2560 LSLANCYEVLSAA  | gj 14286002 sp O94819 I | [LSLANCYEVLSAA Y 23  |
| 2561 MVVESAYEVIKLK  | gj 126041 sp P07195 LD  | [MVVESAYEVIKLK Y 24  |
| 2562 KADGLIYCLKEAC  | gj 1177044 sp P43403 Z  | [KADGLIYCLKEAC Y 24  |
| 2563 TEAPGEYFFSDGI  | gj 124419 sp P12268 IM  | NA                   |
| 2564 ITYEPFYTSGYDD  | gj 56404432 sp O14639 V | [ITYEPFYTSGYDD Y 41  |
| 2565 LINRMDYVEINID  | gj 2498434 sp Q00341 V  | [LINRMDYVEINID Y 437 |
| 2566 VYDELFYTLSPIN  | gj 18202935 sp Q9H223   | [VYDELFYTLSPIN Y 45  |
| 2567 HTGEKPYECVECG  | gj 147742906 sp Q08ER   | NA                   |
| 2568 LGADDSYYTARSA  | gj 1177044 sp P43403 Z  | [LGADDSYYTARSA Y 4   |
| 2569 <<Marker>>     | contol_spot             | NA                   |
| 2570 GEEEHVYSFPNKQ  | gj 27735219 sp P49023 F | [GEEEHVYSFPNKQ Y 1   |
| 2571 PPPDSVYSGVQPG  | gj 12230547 sp O43390 I | NA                   |
| 2572 YDEDSPYQNIKIL  | gj 8247960 sp P52788 SI | NA                   |
| 2573 RVCEPCYEQLNRK  | gj 71152119 sp O14964 I | [RVCEPCYEQLNRK Y 2   |
| 2574 TYVSSFYHAFSGA  | gj 13123943 sp O43707 V | [TYVSSFYHAFSGA Y 2   |
| 2575 ELQSPEYKLSKLR  | gj 146328566 sp Q9UM7   | [ELQSPEYKLSKLR Y 10  |
| 2576 SMSMISYSDAALE  | gj 73921276 sp Q04116   | NA                   |
| 2577 EVNESQYLHSNQP  | gj 730855 sp P25302 SW  | NA                   |
| 2578 EQFEDFYAYCKAI  | gj 731532 sp P39956 RP  | NA                   |
| 2579 NDDELEYASPSNA  | gj 1168370 sp P22149 AI | NA                   |
| 2580 TAKETIYIMLRFF  | gj 129733 sp P12383 PD  | NA                   |
| 2581 LYHDNLYVIWPLL  | gj 1708905 sp P53338 M  | NA                   |
| 2582 ILENSRYVNDKQK  | gj 2507068 sp P22148 M  | NA                   |
| 2583 LNRKSSYKSLDFE  | gj 74645031 sp Q12180 I | NA                   |
| 2584 RQRREKYIKNLEE  | gj 729140 sp P40917 YA  | NA                   |
| 2585 RLSELGYMDRLND  | gj 1708201 sp P32480 HI | NA                   |
| 2586 EYFASIYKNSNRG  | gj 1168610 sp P41696 A  | NA                   |
| 2587 DEDDEEYDVFRNV  | gj 2493550 sp Q02516 H  | NA                   |
| 2588 LMSEGLYKALEAA  | gj 10720303 sp Q15750   | NA                   |
| 2589 FQTQDTYEIIPLM  | gj 119572439 gb EAW52   | NA                   |
| 2590 <<Marker>>     | contol_spot             | NA                   |
| 2591 IRKKT KYTILDNM | gj 74747200 sp Q5VV43   | NA                   |
| 2592 PFKDDRYRRLAPM  | gj 108935999 sp Q9P2C   | NA                   |
| 2593 SFDEQEYPQSELM  | gj 6606080 gb AAF19052  | NA                   |
| 2594 VYDNISYEDLKLM  | gj 62288848 sp Q9ULL1   | NA                   |
| 2595 HMFSDQYLDKEEN  | gj 116242524 sp Q9Y36   | NA                   |
| 2596 KPVQDEYEYVSDN  | gj 119628606 gb EAX082  | NA                   |
| 2597 NEPGTSYMSVQDN  | gj 51316191 sp O14990 I | NA                   |
| 2598 VLDELGYTVHPAA  | gj 7019233 gb AAF35253  | NA                   |
| 2599 TDNPPLYCNPKDN  | gj 45709009 gb AAH6752  | NA                   |

2600 ADLCPQYTNSPFN gj|57284115|emb|CAI432 NA  
2601 LLEDESYDGGAGA gj|90110048|sp|P06401|F NA  
2602 LPGLRTYVDPHTY gj|116241351|sp|P29320 [LPGLRTYVDPHTY|Y|5E  
2603 LQERRKYLKHRLI gj|1711552|sp|P52630|S [LQERRKYLKHRLI|Y|69  
2604 LYAGDYRVQGRA gj|729008|sp|Q08345|DD NA  
2605 MESIDDYVNPES gj|14194891|sp|O43561|I NA  
2606 MTCAELYEKLPPQG gj|464868|sp|Q02763|TIE [MTCAELYEKLPPQG|Y|11  
2607 SRPPDYKDQRRN gj|68565596|sp|Q8IZL2|I NA  
2608 EKQMPKYSSSENSN gj|55976445|sp|Q6S8J3|I NA  
2609 SNPDESYGCLSSN gj|143811435|sp|Q13370 NA  
2610 APNYDSYASYDVN gj|129542|sp|P29122|PC NA  
2611 FAGHESYQNMGPQ gj|71153483|sp|Q14966| NA  
2612 LNRTDCYIMNDPQ gj|73920194|sp|Q8TD26| NA  
2613 FLHNDRYIEFHSQ gj|73921231|sp|Q9BSC4 NA  
2614 GVPNQDYEFQASQ gj|17511840|gb|AAH187 NA  
2615 LFPEDWYQFVLRQ gj|116243177|sp|Q63HM NA  
2616 VMEKLQYASLLSQ gj|119598865|gb|EAW78 NA  
2617 GTPDPEYPDDYSQ gj|145559564|sp|P10696 NA  
2618 SKEDGQYGEVVSQ gj|94730684|sp|Q96BR6| NA  
2619 LDFFDYSITACR gj|83286904|sp|P78348| NA  
2620 NVEAGSYVSFCHR gj|74761421|sp|Q9H3W5 NA  
2621 QEQETSYILRAR gj|116241351|sp|P29320 NA  
2622 SMPSSSYRDMPGG gj|48474599|sp|Q96S82| NA  
2623 ACKESEYHYEYTA gj|147647000|sp|Q6UXG NA  
2624 ELDMEPYTVAGVA gj|81175100|sp|Q93008|I NA  
2625 PEEEDQYWLSMGR gj|20140440|sp|O75140|I NA  
2626 YRPKAIYLDIDGR gj|6166014|sp|O76083|P NA  
2627 DSDDSDYASSKHR gj|12643892|sp|Q9UKJ3| NA  
2628 HLVTAGYVDMAIR gj|21928245|dbj|BAC057 NA  
2629 QGEEPDIYETLHR gj|61222937|sp|Q9UHL0 NA  
2630 VLCADGYILNAHR gj|4884120|emb|CAB432 NA  
2631 SYEEAVYGSSGHC gj|2495723|sp|Q92537|K NA  
2632 AQRVEAYETHGLG gj|143811399|sp|Q86SQ| NA  
2633 KAPLPKYEESNLG gj|74750394|sp|Q86TU7| NA  
2634 LSPDNQYVKVLLG gj|6831570|sp|O14879|IF NA  
2635 ELAKVNYVKNNIC gj|74762615|sp|Q8TD20| NA  
2636 FLPDEPYIKVRIC gj|6685318|sp|Q9Y5I7|CI NA  
2637 WVSSEAYTSPVSR gj|9297048|sp|Q15491|S NA  
2638 ESAPPGYVIALVR gj|73620979|sp|Q8TAB3| NA  
2639 QASKPKYYFAWTL gj|74749574|sp|Q6ZNC8 NA  
2640 QNPYPIYTSVNVR gj|110815895|sp|Q68DD| NA  
2641 QTVENGYHDNPTL gj|17865536|sp|O00592|I NA  
2642 IHFGSDYEDRYR gj|130912|sp|P04156|PR NA  
2643 LGWEALYEQRAEP gj|154937324|ref|NP\_93| NA  
2644 TESPEGYEEAEP gj|68052360|sp|Q8N4X5| NA  
2645 DGSDEGYLCDECS gj|57015418|sp|Q9NZR2 NA  
2646 EGMNPSYDEYADS gj|730840|sp|Q08945|SS NA  
2647 FYFLSQYVSPADS gj|20140912|sp|Q9UP52| NA  
2648 GSYSDLYPDSDDS gj|74723109|sp|Q70CQ2 NA  
2649 RTYDETYQRYRPV gj|41017262|sp|O14974|I NA  
2650 QPGDETYQDIFRD gj|39932727|sp|Q15057|C [QPGDETYQDIFRD|Y|7  
2651 LRENPHYDSRVVG gj|1705916|sp|Q00610|C [LRENPHYDSRVVG|Y|9

2652 STGSEQYSDYSYR gi|24212077|sp|Q08174|I|STGSEQYSDYSYR|Y|9  
2653 AQGNENYAGIAAR gi|81175200|sp|Q9Y490|I|AQGNENYAGIAAR|Y|1  
2654 SHRLSIYEDWDPF gi|152031709|sp|Q13009|NA  
2655 QMKTAGYPNVNIH gi|116242799|sp|Q01082|NA  
2656 GDRVAIYMPMIPE gi|20137525|sp|Q9NR19|NA  
2657 YQLTEAYGVPDAS gi|62906890|sp|Q92485|I|NA  
2658 RRFANEYPNITRL gi|115502368|sp|O75976|NA  
2659 DTGSNAYLNVDYV gi|37999771|sp|Q9BZP6|NA  
2660 GESSLAYEEIVTI gi|134047740|sp|O00763|NA  
2661 DCPGRDYPNICAG gi|2494059|sp|Q16831|U|NA  
2662 EGDPLYVNVNMF gi|17368550|sp|Q92611|I|NA  
2663 GYAFQIYLNLAHV gi|55977853|sp|Q16820|I|NA  
2664 LVSPASYENVRAK gi|131806|sp|P15153|RA|NA  
2665 TLLLCGYPNVGKS gi|17368711|sp|Q9BZE4|NA  
2666 LELLDKYLIPNAT gi|1345590|sp|P31946|I|NA  
2667 DNKDLFYINLYPD gi|729597|sp|P39086|GR|NA  
2668 PYVVASYLRVLR gi|15214047|sp|Q9NS67|NA  
2669 VQVNEVYGLVDGL gi|123120|sp|P25021|HR|NA  
2670 SLKLNVEEIKLR gi|90110827|sp|P17181|I|NA  
2671 LLPNGDYLNVSPTS gi|62298062|sp|Q9Y4H2|NA  
2672 RVGTKRYMAPEVL gi|119631843|gb|EAX11|NA  
2673 INCSDGYIEYYIC gi|45477007|sp|O14494|I|NA  
2674 DVDSLLYVDTDVL gi|152125899|sp|A0PJZ3|NA  
2675 CNSNTDYLETGMC gi|11467963|sp|P26006|I|NA  
2676 FPDCPDYMDEKNC gi|13878447|sp|Q9Y5Q5|NA  
2677 ISGCDVYAEVTLG gi|55665264|emb|CAH72|NA  
2678 LNYPENYSKANC gi|118573095|sp|Q7RTZ|NA  
2679 TFSNLLYVRSMKS gi|37537859|sp|Q9UJX2|NA  
2680 CSFENVYSDDALS gi|74740233|sp|Q504Y3|NA  
2681 GGQEVKYEQCSKS gi|41688792|sp|Q9BYP7|NA  
2682 NITADPYERVDLS gi|74722580|sp|Q5FYB0|NA  
2683 YMSKPSYIHKRKS gi|119576355|gb|EAW55|NA  
2684 IYNWERYHDSQLS gi|2499596|sp|Q16659|M|NA  
2685 DVPSDRYKVEGFP gi|119530|sp|P13667|PD|NA  
2686 RKSMSCYVLSNVL gi|25453321|sp|Q96QK1|NA  
2687 NEVKDPYPSADFP gi|6165995|sp|Q13698|C|NA  
2688 THAGSKYIRTAFF gi|40787792|gb|AAH649|NA  
2689 APGKGDYDGLPGP gi|20178281|sp|P02747|C|NA  
2690 ETSEVEYTVNKGP gi|62898874|dbj|BAD972|NA  
2691 VGSDPGYSGHHRG gi|21751407|dbj|BAC039|NA  
2692 IICGTLVVTNGYS gi|20141608|sp|Q99784|I|NA  
2693 RTCFPQYLNGGTC gi|119622500|gb|EAX02|NA  
2694 ERRNTGYQFIYYS gi|73920062|sp|O15327|I|NA  
2695 IGAKLQYGDYYS gi|92090637|sp|Q9H9Y6|NA  
2696 VMSADRYLVVLLAT gi|1346163|sp|P48145|NI|NA  
2697 TAENPEYLGLDVP gi|119533|sp|P04626|ER|TAENPEYLGLDVP|Y|12  
2698 GAFGTVYKGIWVP gi|3913590|sp|Q15303|E|NA  
2699 KGFGGQYGIQKDR gi|123557|sp|P14317|HC|KGFGGQYGIQKDR|Y|1  
2700 PNQGRYYEGYYAA gi|74751663|sp|Q93052|I|PNQGRYYEGYYAA|Y|2  
2701 QQDGKDYIVLPIS gi|9087218|sp|P35968|V|QQDGKDYIVLPIS|Y|11  
2702 PASEQGYEEMRAF gi|119534|sp|P21860|ER|PASEQGYEEMRAF|Y|1  
2703 AFDNLYYWDQDPP gi|119533|sp|P04626|ER|AFDNLYYWDQDPP|Y|1



|      |               |                                             |
|------|---------------|---------------------------------------------|
| 2704 | TFGAKPYDGIPAR | gj 119533 sp P04626 ER NA                   |
| 2705 | HRNDSIYEELQKH | gj 1706794 sp P49789 F  [HRNDSIYEELQKH Y 11 |
| 2706 | REVSFYSEENKL  | gj 124240 sp P08069 IGF [REVSFYSEENKL Y 12  |
| 2707 | YVDFREYEYDLKW | gj 544320 sp P36888 FL [YVDFREYEYDLKW Y 5   |
| 2708 | FREVSFYSEENK  | gj 124240 sp P08069 IGF [FREVSFYSEENK Y 12  |
| 2709 | ESEEELYSSCRQL | gj 143811440 sp P16885 [ESEEELYSSCRQL Y 11  |
| 2710 | TLGKAEYLKNNIL | gj 3913590 sp Q15303 E NA                   |
| 2711 | LGRSGSYSYLEER | gj 41017262 sp O14974 I [LGRSGSYSYLEER Y 9  |
| 2712 | LPLDKDYVREP   | gj 50403745 sp P52333 L [LPLDKDYVREP Y 98   |
| 2713 | PRPDSYSRPHDS  | gj 143220234 sp O60496 [PRPDSYSRPHDS Y 2    |
| 2714 | RADENYYKAQTHG | gj 1174527 sp P43405 K [RADENYYKAQTHG Y 5   |
| 2715 | GWVPSNYITPVNS | gj 1168268 sp P42684 AI [GWVPSNYITPVNS Y 1  |
| 2716 | KGQESEYGNITYP | gj 131469 sp P29350 PTI [KGQESEYGNITYP Y 5  |
| 2717 | RVDLGIYLNQTPL | gj 17369720 sp Q9UQ49 [RVDLGIYLNQTPL Y 34   |
| 2718 | YATRDVYNPFETR | gj 21542431 sp O14828  [YATRDVYNPFETR Y 4   |
| 2719 | ARDPQRYLVIQGD | gj 2811086 sp P00533 E [ARDPQRYLVIQGD Y 9   |
| 2720 | ETLKVYDFIEKT  | gj 2116984 dbj BAA2012 NA                   |
| 2721 | DPTPQHYPYSGVT | gj 125370 sp P06241 FYI [DPTPQHYPYSGVT Y 3  |
| 2722 | EVYESPYADPEEI | gj 1174527 sp P43405 K [EVYESPYADPEEI Y 35  |
| 2723 | GMFPRNYVTPVNR | gj 51702266 sp P62993 C [GMFPRNYVTPVNR Y 2  |
| 2724 | LQDSDEYSNPAPL | gj 8134557 sp O60711 LI [LQDSDEYSNPAPL Y 2  |
| 2725 | QTYTREYFTFPAS | gj 12644018 sp P55196  NA                   |
| 2726 | SLGSQSYEDMRGI | gj 110282942 sp P15391 [SLGSQSYEDMRGI Y 5   |
| 2727 | RPELIDYGKLRKD | gj 46397817 sp P12814  NA                   |
| 2728 | SKFDNLYGCRESL | gj 92098073 gb AAI1492 NA                   |
| 2729 | FIFPPSYVPVMS  | gj 136727 sp P16662 UD NA                   |
| 2730 | RRDGRKYPELVLD | gj 13431377 sp Q9Y5E6  NA                   |
| 2731 | TSHRRSYSGRSR  | gj 20981728 sp Q13247  NA                   |
| 2732 | TEWQQTYTYDSGI | gj 130257 sp P14923 PL [TEWQQTYTYDSGI Y 2   |
| 2733 | VPVVEGYHGEDQS | gj 108861983 sp Q96RQ NA                    |
| 2734 | VHPDTIYSVDWSR | gj 1706004 sp P31146 C NA                   |
| 2735 | EGPDAMYVKLISS | gj 32699511 sp Q15369 I NA                  |
| 2736 | PGSGSIYSSPGLY | gj 38258220 sp Q96AC1  NA                   |
| 2737 | EAERKLYSGAQTD | gj 1177044 sp P43403 Z NA                   |
| 2738 | RTPRKFYITLLR  | gj 150421569 sp O60243 NA                   |
| 2739 | LARRAIQATYRD  | gj 1172607 sp P28074 P NA                   |
| 2740 | RQEEGYSRLEAE  | gj 12644018 sp P55196  NA                   |
| 2741 | FLKKYLYEIARRH | gj 113576 sp P02768 ALI NA                  |
| 2742 | GGREPQYSSLSAA | gj 2494684 sp Q92908 G NA                   |
| 2743 | VPSSGPYDCPASF | gj 8134421 sp O43281 E NA                   |
| 2744 | DEKVVSYSKQQNL | gj 119570354 gb EAW49 NA                    |
| 2745 | DPTLATYSGRTIM | gj 57012588 sp Q6W2J9 NA                    |
| 2746 | TTLPRDYSTLTSV | gj 13638154 sp P16144 I NA                  |
| 2747 | RSKRRKYSFECTD | gj 33112440 sp O94813  NA                   |
| 2748 | DDDFYAYDEGTR  | gj 18202960 sp Q9HCX4 NA                    |
| 2749 | TEEQKKYYNAMKK | gj 150417969 ref NP_00 [TEEQKKYYNAMKK Y 1   |
| 2750 | MKGTSQYYPSYSG | gj 3337302 gb AAC2737 NA                    |
| 2751 | RANVTGYFSPNDH | gj 131573277 gb ABO33 NA                    |
| 2752 | FPATRAYADSYYY | gj 73619722 sp Q8IVM0  NA                   |
| 2753 | RVNFGPYDNYIPV | gj 2498278 sp Q14093 C NA                   |
| 2754 | TDEENVYGLEENA | gj 38372377 sp Q8WWP NA                     |
| 2755 | GAASGGYIKRITN | gj 6685971 sp O00161 S NA                   |

|      |                |                                              |
|------|----------------|----------------------------------------------|
| 2756 | GYIPSNYVAPSDS  | gi 125711 sp P12931 SR NA                    |
| 2757 | LCLSSIEDLKMY   | gi 20141534 sp P29459 I NA                   |
| 2758 | LRGQPIYIQFSNH  | gi 131528 sp P26599 PT  [LRGQPIYIQFSNH Y 12; |
| 2759 | ITNHDEYSLVREL  | gi 81175200 sp Q9Y490  NA                    |
| 2760 | TIKTSHYLTPQSN  | gi 119576383 gb EAW55 NA                     |
| 2761 | TSGVQCYGPGIEG  | gi 116241365 sp P21333 NA                    |
| 2762 | LQSEVAYKQKHDA  | gi 13124346 sp O76041 I NA                   |
| 2763 | ARLSSAYLLGVPG  | gi 73620948 sp Q96P48  NA                    |
| 2764 | SVSDFNYSRTSPS  | gi 116242614 sp Q96RT NA                     |
| 2765 | LYQCVIYQPPKEP  | gi 50401685 sp Q9NP99  NA                    |
| 2766 | EEDVNGYVMPDTH  | gi 119534 sp P21860 ER NA                    |
| 2767 | QLLYQEYSDVVLN  | gi 6094485 sp Q12774 A [QLLYQEYSDVVLN Y 11   |
| 2768 | ILNDDIYCPETA   | gi 127234 sp P26038 MC NA                    |
| 2769 | KRTAKRYEEILDA  | gi 12643718 sp Q13439  NA                    |
| 2770 | RKAKKYLRVVIW   | gi 20139241 sp Q9NZM1 NA                     |
| 2771 | LEEILAYQPDILC  | gi 17369689 sp Q9UK39  NA                    |
| 2772 | LDKSTPYTAVRWV  | gi 6226763 sp O15258 R NA                    |
| 2773 | TQTPPAYINVLPG  | gi 1730008 sp P53804 T NA                    |
| 2774 | FTSRDYINIRKA   | gi 13124667 sp O43143 I NA                   |
| 2775 | LQVLASYINPVSS  | gi 12585192 sp Q9NR09 NA                     |
| 2776 | GCRNLEYLNLSWC  | gi 145559475 sp Q9UKC NA                     |
| 2777 | KQVKDMYLIPLGA  | gi 34098662 sp Q92576 I NA                   |
| 2778 | SSCLEAYGAPEQV  | gi 1717869 sp P45974 UI NA                   |
| 2779 | QDAIKCYLNAARS  | gi 6175093 sp O14607 U NA                    |
| 2780 | RTHEDLYIIPIN   | gi 124065 sp P22692 IBF NA                   |
| 2781 | TGKSADYVNLALK  | gi 124106290 sp Q9Y4C  NA                    |
| 2782 | LSNPIRYVNLMEQ  | gi 12643814 sp Q9NQ66 NA                     |
| 2783 | HRDSYAYLNASYG  | gi 25008939 sp O75626 I NA                   |
| 2784 | DDPDVRYTAVSSF  | gi 13959562 sp Q14644 I NA                   |
| 2785 | WWRGEIYGRVGVWF | gi 13124807 sp P15498 \ NA                   |
| 2786 | SDLECDYINARSC  | gi 12229837 sp Q9P003  NA                    |
| 2787 | LYSAFSYMGPSQR  | gi 6175075 sp P56693 S  NA                   |
| 2788 | LEQRKEYEEIMRD  | gi 136652 sp P17480 UB NA                    |
| 2789 | VTKWKHYLRVHMR  | gi 3123312 sp P52746 ZI NA                   |
| 2790 | MEGLLHYINPAHA  | gi 9979550 sp Q9ULJ3 Z NA                    |
| 2791 | IDIGKEYIIPSPG  | gi 8928547 sp O15440 M NA                    |
| 2792 | FYKNVAYVNULLFW | gi 29337239 sp Q9P241  NA                    |
| 2793 | HTREKPYKCEECG  | gi 119370557 sp O75437 NA                    |
| 2794 | NSAEYYENVPCK   | gi 74729123 sp Q8N6F7  NA                    |
| 2795 | YLEDKVYLTGYNF  | gi 17378996 sp O43324 I NA                   |
| 2796 | VPYVFRYFVAELA  | gi 92090637 sp Q9H9Y6  NA                    |
| 2797 | LQEESDYITHYTR  | gi 126157508 ref NP_99  NA                   |
| 2798 | DYNPYNYSDSISP  | gi 77416392 sp O75122  NA                    |
| 2799 | FETDSSYSDANNF  | gi 1169745 sp P42685 FI [FETDSSYSDANNF Y 4;  |
| 2800 | F6:17          | contol_spot NA                               |
| 2801 | pY             | contol_spot NA                               |
| 2802 | pY             | contol_spot NA                               |
| 2803 | GST            | contol_spot [IMRDSNYISKGST Y 85;             |
| 2804 | pY             | contol_spot NA                               |
| 2805 | pY             | contol_spot NA                               |
| 2806 | GST            | contol_spot [IMRDSNYISKGST Y 85;             |
| 2807 | VDNGYGYVSNGSV  | gi 20141641 sp P49589  NA                    |

|                     |                            |
|---------------------|----------------------------|
| 2808 LRCECKYEERSSV  | gi 20532029 sp Q9NQ34 NA   |
| 2809 YLRNNGYEEAYSV  | gi 1170794 sp P43034 LI NA |
| 2810 INRMLLYECHPTV  | gi 32469769 sp Q96L73 I NA |
| 2811 QDREGSYHEVTTV  | gi 134270875 gb ABO69; NA  |
| 2812 SRLAGGYENVPTV  | gi 6093731 sp O60568 P NA  |
| 2813 ILVENTYEEVVLQ  | gi 22256935 sp Q96TA1  NA  |
| 2814 IQKEIKYSDSLLQ  | gi 114155158 ref NP_00 NA  |
| 2815 KGEKSKYPQGRFW  | gi 34222652 sp Q9NPH3 NA   |
| 2816 MGGDGRYVLNGHW  | gi 115311311 sp Q6ZMV NA   |
| 2817 PKKMTDYAKKRGW  | gi 1346766 sp P48556 P NA  |
| 2818 SAIPPKYVNGSKW  | gi 118601093 sp Q9Y2I6 NA  |
| 2819 LPFEASYICHCPP  | gi 118572677 sp P46531 NA  |
| 2820 VVESDLYAMNFP   | gi 118607 sp P15559 NQ NA  |
| 2821 ENSPPDYSEYMTG  | gi 3915889 sp P25490 T NA  |
| 2822 ATGMPVYCNVTPP  | gi 119584875 gb EAW64 NA   |
| 2823 KLRKVKEYEETVfy | gi 1172027 sp P43490 N NA  |
| 2824 NSKNDVYVAIAQP  | gi 32469740 sp Q8N0V4  NA  |
| 2825 EVYNLFYVNNWY   | gi 37999759 sp Q96ST3  NA  |
| 2826 LCSFEIYEVWED   | gi 399336 sp P01036 CY NA  |
| 2827 VASWQGYENYNYY  | gi 5902752 sp O43823 A NA  |
| 2828 GAKTDTYVTDNGD  | gi 32129530 sp Q14315 I NA |
| 2829 ILSKFLYYSINGD  | gi 109826957 sp Q3B7T NA   |
| 2830 NLDEGTYQLHFD   | gi 74752433 sp Q9BXN2 NA   |
| 2831 LYFDDEYNIVKRD  | gi 1708437 sp P09529 IN NA |
| 2832 AHDDIPYSSAGSD  | gi 1345855 sp P49585 P NA  |
| 2833 KCAELHYMVVATD  | gi 547807 sp P07949 RE NA  |
| 2834 SQNNELYLRFKSD  | gi 88911282 sp O60494  NA  |
| 2835 LVDCEGYPRSDVD  | gi 12230943 sp O00233 I NA |
| 2836 VEPKEDYSHDHVD  | gi 145559447 sp Q0828 NA   |
| 2837 ARREQRYQEQGGE  | gi 51316115 sp Q9UJU6  NA  |
| 2838 EVIEDTYGAGGGE  | gi 68565783 sp Q7Z494  NA  |
| 2839 HPRENHYGNECGE  | gi 85681861 sp P17032  NA  |
| 2840 PEEKVPYVNSPGE  | gi 85701877 sp Q7Z3G6  NA  |
| 2841 IDAEEKYISGPHE  | gi 1345731 sp P49454 C NA  |
| 2842 QLRWGDYDSDHIE  | gi 67460824 sp Q6P2Q9 NA   |
| 2843 <<Marker>>     | control_spot NA            |
| 2844 FGNEGVYVAARE   | gi 73622083 sp Q8IWA0  NA  |
| 2845 RGENLYYEIGASE  | gi 68846537 sp O14559  NA  |
| 2846 NSSRDRYATTDTA  | gi 133777742 gb AAI104 NA  |
| 2847 PKSEGQYSGFKSP  | gi 3915804 sp Q99572 P NA  |
| 2848 GSSEELYCICRTP  | gi 119609391 gb EAW88 NA   |
| 2849 SAKFPDYKSTWSP  | gi 38258268 sp Q9UPQ9 NA   |
| 2850 IIGNTDYAIEPGT  | gi 47606182 sp Q8IZU2  NA  |
| 2851 CESNQPYGNTRIT  | gi 74733518 sp Q9H094  NA  |
| 2852 GGWVDTYHNTGIT  | gi 61212142 sp Q9NT62  NA  |
| 2853 KGEDVGYVASEIT  | gi 145559526 sp O94885 NA  |
| 2854 RVSEEWYNRLRIT  | gi 125987815 sp Q05707 NA  |
| 2855 YTDEWIYIESPIT  | gi 124012093 sp Q86XK NA   |
| 2856 SPFGTDYRNLANT  | gi 92087169 sp Q9P2B4  NA  |
| 2857 VYNNMYVNMNYNT  | gi 29126831 gb AAH477 NA   |
| 2858 LRHGKYTCAQMT   | gi 399092 sp Q02246 CN NA  |
| 2859 CDSLLDYCDPDRT  | gi 143955274 sp Q8NEM NA   |

|      |                |                         |    |
|------|----------------|-------------------------|----|
| 2860 | LVSKVGYKLHGRT  | gj 18202951 sp Q9HAV7   | NA |
| 2861 | VEREILYHTVART  | gj 47605778 sp O95944 I | NA |
| 2862 | QQFCGEYAYVTVC  | gj 74750436 sp Q86UV5   | NA |
| 2863 | CDFKQLYIYPGCD  | gj 32171483 sp Q8NFP9   | NA |
| 2864 | <<Marker>>     | control_spot            | NA |
| 2865 | PGTSTRYEQPKCD  | gj 38258648 sp Q9H3U7   | NA |
| 2866 | CLSESIYRSKGLQ  | gj 145559521 sp Q13702  | NA |
| 2867 | FTVWEPYMDVSAV  | gj 73920974 sp Q9Y4E6   | NA |
| 2868 | NVSEHDYGNITCV  | gj 27151645 sp Q9P121   | NA |
| 2869 | DLRNEIYCTILIV  | gj 11493411 gb AAG354   | NA |
| 2870 | KKLKPEYDIMCKV  | gj 25453240 sp Q9NTK5   | NA |
| 2871 | NCSAEGYPVPTIV  | gj 12643619 sp O60469 I | NA |
| 2872 | RESSEYYWKSGKV  | gj 119598995 gb EAW78   | NA |
| 2873 | STLEEVYGSVAKV  | gj 116241339 sp Q07864  | NA |
| 2874 | HESAEPYAKHMKP  | gj 13878716 sp O60930 I | NA |
| 2875 | KVNEGKYRSYEEF  | gj 10719919 sp Q15326   | NA |
| 2876 | QSRNLKYASWKEF  | gj 13528813 gb AAH052   | NA |
| 2877 | HISFALYVDNRFF  | gj 74743973 sp Q5SXJ2   | NA |
| 2878 | ITSDNRYILVCGF  | gj 20141570 sp P50851 L | NA |
| 2879 | LLDDEEYEYSLFF  | gj 119610283 gb EAW89   | NA |
| 2880 | RSHEVGYTRILFF  | gj 62088696 dbj BAD927  | NA |
| 2881 | TNNNVAYWDVLKA  | gj 74760390 sp Q8TAF3   | NA |
| 2882 | GLSSLLYGSIPKA  | gj 20141931 sp P53007   | NA |
| 2883 | SQEELLYSSKQSF  | gj 145559498 sp Q86UW   | NA |
| 2884 | DDWKGHYANVACA  | gj 13124582 sp P57727   | NA |
| 2885 | <<Marker>>     | control_spot            | NA |
| 2886 | ERRADVYVGVDVF  | gj 119609967 gb EAW89   | NA |
| 2887 | GQMNIYMNNTDM   | gj 145559531 sp Q8WW    | NA |
| 2888 | SSEKRNYEVNAYH  | gj 154759253 ref NP_00  | NA |
| 2889 | LKYEAIYPETAAI  | gj 1722884 sp Q01831 X  | NA |
| 2890 | TEEEVDYTVKCI   | gj 62512153 sp Q9Y697   | NA |
| 2891 | ETEEGIYWRYCDI  | gj 30173086 sp Q8NCW    | NA |
| 2892 | NGIWPKYSDINDI  | gj 145558905 sp Q05BV   | NA |
| 2893 | WGENSYFINGDI   | gj 110287684 sp Q8NI08  | NA |
| 2894 | EKWMDRYEIDSLI  | gj 3219996 sp Q13627 D  | NA |
| 2895 | KIQKEKYVHRLLI  | gj 108861911 sp Q8WZ4   | NA |
| 2896 | AIEKPTYATKWPI  | gj 47117647 sp P61158   | NA |
| 2897 | WRSCSSYSSWPPI  | gj 119596502 gb EAW76   | NA |
| 2898 | FQAEAGGYVLYPQI | gj 2494367 sp Q15768 E  | NA |
| 2899 | NKEEHYSAAFQI   | gj 74754109 sp Q4W4Y0   | NA |
| 2900 | SAERLWYVSVNGK  | gj 122748 sp P11487 FG  | NA |
| 2901 | WMEDYDYVHLQGK  | gj 8134339 sp P56945 B  | NA |
| 2902 | GIGDPKYVPVTDM  | gj 154800439 ref NP_77  | NA |
| 2903 | YAWEPSYKNKIIK  | gj 74136409 ref NP_001  | NA |
| 2904 | AIENCEYAFNLKK  | gj 13633914 sp Q15796   | NA |
| 2905 | IVSELIYAVSKKK  | gj 61216781 sp Q6IMI4   | NA |
| 2906 | <<Marker>>     | control_spot            | NA |
| 2907 | RIFDDYVACCVK   | gj 1170014 sp P28676 G  | NA |
| 2908 | GDAKSKYKRIYVK  | gj 152125807 sp Q2KHR   | NA |
| 2909 | TYENFQYLENKVK  | gj 59797948 sp Q8IUN9   | NA |
| 2910 | DSAMESYFRAGAL  | gj 1709662 sp P55058 P  | NA |
| 2911 | QAETELYAEAEEM  | gj 13432177 sp P35749   | NA |

|                     |                                              |
|---------------------|----------------------------------------------|
| 2912 ASKDAKYELVKAL  | gj 3122657 sp Q16401 P NA                    |
| 2913 PGDAGEYVCKLIL  | gj 50400545 sp Q8IZF2 C NA                   |
| 2914 RLIEVLYEDLLKL  | gj 119591354 gb EAW70 NA                     |
| 2915 FHEPDIYNYSALL  | gj 8134701 sp Q92854 S NA                    |
| 2916 KGESHEYVTF SKL | gj 62296764 sp Q13129 I NA                   |
| 2917 RGESLGYTEGALL  | gj 116242702 sp Q96QU NA                     |
| 2918 AGSERDYTYEELL  | gj 12644154 sp P20042 I NA                   |
| 2919 RSREEPYHYGNKM  | gj 85701877 sp Q7Z3G6  NA                    |
| 2920 SKIEWDYECEPGM  | gj 74751176 sp Q8NBT2 NA                     |
| 2921 CMELEKYVEELAA  | gj 32699565 sp Q8IUG5  NA                    |
| 2922 AAREDPYGVAVGG  | gj 74718825 sp Q9HC07 NA                     |
| 2923 AKDTGEYACVTGG  | gj 97180266 sp Q5VST9  NA                    |
| 2924 DGNKWLYKNKDHG  | gj 6174930 sp Q13200 P NA                    |
| 2925 RYQPGKYMPNQS   | gj 14548196 sp Q9NRQ2 [RYQPGKYMPNQS Y 8      |
| 2926 SEEIRFYQLGEEA  | gj 1168948 sp P22001 K  [SEEIRFYQLGEEA Y 13  |
| 2927 <<Marker>>     | contol_spot NA                               |
| 2928 CSPPPDYNSVVLY  | gj 143811474 sp P17948 [CSPPPDYNSVVLY Y 13   |
| 2929 SKNFDDYMKSLGV  | gj 119802 sp P05413 FAI [SKNFDDYMKSLGV Y 2   |
| 2930 SRGEEVYVKKTMG  | gj 549081 sp P35590 TIE NA                   |
| 2931 TGENPIYKSAVTT  | gj 124963 sp P05556 ITE [TGENPIYKSAVTT Y 78: |
| 2932 ERGDKGYVPSVFI  | gj 6226158 sp Q14765 S [ERGDKGYVPSVFI Y 69   |
| 2933 ETQFNQYKTEAAS  | gj 547937 sp P15941 MU NA                    |
| 2934 AIKMVQYRDSFLT  | gj 1706663 sp P54762 EI NA                   |
| 2935 FQQQMIYDSPPSR  | gj 90180201 sp Q13480 C [FQQQMIYDSPPSR Y 2:  |
| 2936 GCPPAVYEV MKNC | gj 729887 sp P41240 CS NA                    |
| 2937 GGGGEFYGYMTMD  | gj 62298062 sp Q9Y4H2  NA                    |
| 2938 IMNDSNYIVKGNA  | gj 547770 sp P07333 CS [IMNDSNYIVKGNA Y 80   |
| 2939 VPNQPVYNQPVYN  | gj 14548191 sp O15162 I [VPNQPVYNQPVYN Y 6   |
| 2940 LMEKDSYPRFLKS  | gj 3914624 sp O15492 R [LMEKDSYPRFLKS Y 16   |
| 2941 RTTSQLYDAVPIQ  | gj 17380162 sp O15530 I [RTTSQLYDAVPIQ Y 9 C |
| 2942 GGKGGSYSQAACS  | gj 231404 sp P30481 1B: [GGKGGSYSQAACS Y 3:  |
| 2943 EEGRDEYDEVAMP  | gj 114787 sp P02730 B3: [EEGRDEYDEVAMP Y 9   |
| 2944 LSEETPYSYPTGN  | gj 27735219 sp P49023 F [LSEETPYSYPTGN Y 31  |
| 2945 ENDDDVYRSLEEL  | gj 1718101 sp P52735 V: [ENDDDVYRSLEEL Y 14  |
| 2946 ENTEDQYSLVEDD  | gj 118572681 sp P27986 [ENTEDQYSLVEDD Y 6    |
| 2947 DGHEYIYVDP MQL | gj 129892 sp P16234 PG [DGHEYIYVDP MQL Y 58  |
| 2948 <<Marker>>     | contol_spot NA                               |
| 2949 MKGDVKYADI ESS | gj 129890 sp P09619 PG [MKGDVKYADI ESS Y 76  |
| 2950 IMRDSNYISKGST  | gj 129890 sp P09619 PG [IMRDSNYISKGST Y 85:  |
| 2951 TGQHQQGYGFVEFL | gj 2500587 sp Q15427 S [TGQHQQGYGFVEFL Y 5   |
| 2952 IQNTGDYDLYGG   | gj 84028248 sp Q06124 I [IQNTGDYDLYGG Y 62   |
| 2953 AKKEGPYDVV VLP | gj 56404943 sp Q99497 I [AKKEGPYDVV VLP Y 67 |
| 2954 AVVEEDYNENAKN  | gj 23396771 sp P82970 T [AVVEEDYNENAKN Y 7   |
| 2955 EELESQYQQSMDS  | gj 74735316 sp O00193 C [EELESQYQQSMDS Y 8   |
| 2956 KEDALLYQSKGYN  | gj 1706639 sp P50402 EI [KEDALLYQSKGYN Y 8:  |
| 2957 ADLTEQYNEQYGA  | gj 62511089 sp Q9BWF3 [ADLTEQYNEQYGA Y 1:    |
| 2958 EFGGSIYQKV NKK | gj 130683 sp P21796 VD NA                    |
| 2959 EKSDAEYTN SPLV | gj 73620123 sp Q8IX90 C [EKSDAEYTN SPLV Y 28 |
| 2960 PHL SKGYAYVEFE | gj 74754492 sp Q15287 I [PHL SKGYAYVEFE Y 2C |
| 2961 SKDQPDYAMYSRI  | gj 32469765 sp Q92608 I [SKDQPDYAMYSRI Y 2C  |
| 2962 GEPNVS YICSRYY | gj 20455502 sp P49841 C [GEPNVS YICSRYY Y 27 |
| 2963 SARAFPYGNVAFP  | gj 74749365 sp Q6UN15 [SARAFPYGNVAFP Y 4:    |

|      |                |                                            |
|------|----------------|--------------------------------------------|
| 2964 | FKVGINYQPPTVV  | gj 119591124 gb EAW70 FKVGINYQPPTVV Y 35   |
| 2965 | EKSEGTYCCGPVP  | gj 20141877 sp P21980 EKSEGTYCCGPVP Y 3    |
| 2966 | HYNGEAYEDDEHH  | gj 1706474 sp P31689 D HYNGEAYEDDEHH Y 3   |
| 2967 | QNGQTIYLRGTGD  | gj 18203627 sp Q9Y227 NA                   |
| 2968 | GQGPYPYSLSEPA  | gj 13431358 sp Q9NZB2 GQGPYPYSLSEPA Y 3    |
| 2969 | <<Marker>>     | contol_spot NA                             |
| 2970 | QRAQENYEGSSEEV | gj 81175100 sp Q93008 I QRAQENYEGSSEEV Y 2 |
| 2971 | PAQDPLYDVPNAS  | gj 116242760 sp Q13671 PAQDPLYDVPNAS Y 3   |
| 2972 | KENEEDYGTCS    | gj 119611684 gb EAW91 KENEEDYGTCS Y 3      |
| 2973 | SSSVQYTPVYKL   | gj 119611684 gb EAW91 SSSVQYTPVYKL Y 4     |
| 2974 | RFPLDYYSIPFPT  | gj 109940042 sp Q14157 RFPLDYYSIPFPT Y 8   |
| 2975 | DRGRSDYDGIGSR  | gj 3023628 sp O00571 D DRGRSDYDGIGSR Y 1   |
| 2976 | HLFEDLYCSPLFR  | gj 417110 sp P25364 HC NA                  |
| 2977 | IDFETAYQMLSSN  | gj 124503 sp P26798 INC NA                 |
| 2978 | LRRERSYDGN     | gj 135077 sp P08153 SW NA                  |
| 2979 | RQRKEKYIKNLEQ  | gj 45477263 sp Q03935 NA                   |
| 2980 | DSTNTLYENTADM  | gj 50400296 sp Q04052 NA                   |
| 2981 | IAYETIYCEKNKR  | gj 50400296 sp Q04052 NA                   |
| 2982 | SVSNPPYHRGYSI  | gj 417770 sp P32432 SFI NA                 |
| 2983 | SSIPEKYKDVLT   | gj 1351976 sp P05085 AI NA                 |
| 2984 | DMSANHYVVNDNS  | gj 417456 sp P19880 YA NA                  |
| 2985 | SMSSIQYVENNNP  | gj 462625 sp P33748 MS NA                  |
| 2986 | ATSNGIYTQAQYS  | gj 417039 sp Q01722 GC NA                  |
| 2987 | ANFVDSYKSSNAY  | gj 1169692 sp P41813 FI NA                 |
| 2988 | KPSNILYVDESGN  | gj 1730070 sp P51812 K NA                  |
| 2989 | IARQGSYTSINSE  | gj 2499640 sp Q99759 M NA                  |
| 2990 | <<Marker>>     | contol_spot NA                             |
| 2991 | VQTSEQYEFVHHA  | gj 134039192 sp Q15256 NA                  |
| 2992 | ESSDDDYDDVDIP  | gj 29427916 sp Q92918 I ESSDDDYDDVDIP Y 3  |
| 2993 | ERDEPAYPRGDSS  | gj 6685621 sp Q9Y6R4 M NA                  |
| 2994 | PMWGSYVQLSRT   | gj 6685621 sp Q9Y6R4 M NA                  |
| 2995 | LKPNDDYLLKTAN  | gj 1345616 sp P48595 SI NA                 |
| 2996 | SLNELTYNNLPAN  | gj 74727919 sp Q86YC2 NA                   |
| 2997 | VYTELLYTNKCYM  | gj 74762741 sp Q9H6R0 NA                   |
| 2998 | YVRDLGYVVEGYM  | gj 8928460 sp O75962 TI NA                 |
| 2999 | EGLEENYCRNPDN  | gj 130316 sp P00747 PLI NA                 |
| 3000 | TKSKGPYICALCA  | gj 3024110 sp P56270 M NA                  |
| 3001 | PGEEEEYRCEAKN  | gj 120660202 gb AAI304 NA                  |
| 3002 | QTNKRDYVSKYIN  | gj 47116944 sp Q9UII4 H NA                 |
| 3003 | CGVDGDYEDAELN  | gj 143811366 sp P11274 CGVDGDYEDAELN Y 2   |
| 3004 | GKGMFKYSDHPLN  | gj 147734568 sp Q86XM NA                   |
| 3005 | LGADDGYMPMTPG  | gj 62298062 sp Q9Y4H2 [LGADDGYMPMTPG Y 6   |
| 3006 | LIKDDEYNPCQGS  | gj 125358 sp P09769 FG LIKDDEYNPCQGS Y 41  |
| 3007 | PSSMDVYDSL     | gj 74712291 sp Q6ZVL6 NA                   |
| 3008 | SEYETCYVTSHKG  | gj 461848 sp Q05048 CS NA                  |
| 3009 | EFQCDAYTCSNGG  | gj 116242598 sp Q9Y21 NA                   |
| 3010 | HGRPDHYEEAPRN  | gj 74723955 sp Q8TEB9 NA                   |
| 3011 | KSVEEDYVTNIRN  | gj 74751385 sp Q8TBM8 NA                   |
| 3012 | PNSELHYSLSGRN  | gj 119625608 gb EAX05 NA                   |
| 3013 | DMADEAYSIGPAP  | gj 108861983 sp Q96RQ NA                   |
| 3014 | GGGNSEYVRC     | gj 20137548 sp Q9R160 NA                   |
| 3015 | KFENELYVTMHYN  | gj 13124361 sp Q9UKN7 NA                   |

|                     |                                             |
|---------------------|---------------------------------------------|
| 3016 PDRECIYIIEAAP  | gi 59798466 sp Q8TDF5  NA                   |
| 3017 TTAWEDIWFAQP   | gi 3123048 sp Q15013 M NA                   |
| 3018 YLGDTHYKEIPAP  | gi 116241261 sp Q16720 NA                   |
| 3019 KLFKEAYQIACLG  | gi 20140806 sp Q9HBG6 NA                    |
| 3020 LIRDTMYKIFPKG  | gi 2598719 dbj BAA2330 NA                   |
| 3021 PETNQIYENDNKG  | gi 85542144 sp Q562F6  NA                   |
| 3022 RLGEDPYTENG    | gi 3183511 sp P28906 C  [RLGEDPYTENG Y 3    |
| 3023 FRNEADYKAALCR  | gi 30173387 sp Q9NTZ6  NA                   |
| 3024 GHNGETYSSVCAA  | gi 20178043 sp O95980 I NA                  |
| 3025 YSYSNSYNSPGGG  | gi 62512150 sp Q12906 I NA                  |
| 3026 AEETPPYSNYNTL  | gi 152031709 sp Q13009 NA                   |
| 3027 RGHEGSYVGKHFR  | gi 153792764 ref NP_06 NA                   |
| 3028 AAKELDYEISHGR  | gi 17366834 sp Q9H251  NA                   |
| 3029 FAFKVPYVELGGR  | gi 32700066 sp O00445  NA                   |
| 3030 HFGERDYDILAGR  | gi 118573058 sp Q9P27 NA                    |
| 3031 AFQEVLYVDPDFC  | gi 6136154 sp O15550 U NA                   |
| 3032 GFSEFYCTEDVL   | gi 18203627 sp Q9Y227  NA                   |
| 3033 GSSSDQYASGHGC  | gi 27734975 ref NP_775 NA                   |
| 3034 IRFDNIYISTYFC  | gi 74756229 sp Q5T197  NA                   |
| 3035 LDREGNYLRPRGC  | gi 27437034 ref NP_758 NA                   |
| 3036 RVTCDYDYGGFGC  | gi 20455033 sp P78504  NA                   |
| 3037 NLPHSGYSDSAVL  | gi 12643409 sp P43243  NA                   |
| 3038 MFASDSYICFASR  | gi 37538010 sp O95759  NA                   |
| 3039 EMPKTLYVGNLSR  | gi 6094480 sp P31483 TI NA                  |
| 3040 SARNVPYGNIQSR  | gi 51315838 sp Q10471  NA                   |
| 3041 GIIDGEYVVNPTR  | gi 115502437 sp Q8TCS NA                    |
| 3042 SLNEEWYVSYITR  | gi 10720065 sp Q13094 I NA                  |
| 3043 VKDKFIYVAQPTL  | gi 62510692 sp Q8N475  NA                   |
| 3044 HRVKEDYTRVVCP  | gi 51316071 sp Q96FL9  NA                   |
| 3045 IRSLEPPYSDIHDP | gi 119568598 gb EAW48 NA                    |
| 3046 MGRKPGYFSFLDP  | gi 3287848 sp Q16099 G NA                   |
| 3047 QHRGERYKNMIDP  | gi 17380317 sp Q9Y345  NA                   |
| 3048 HPSDEKYSGLTAS  | gi 114149931 sp Q96AT NA                    |
| 3049 YHPADGYAFSSNI  | gi 2833239 sp Q12929 E NA                   |
| 3050 TSSDTTYKGGASE  | gi 92090378 sp Q9UGUC NA                    |
| 3051 GVKKPTYDPVSED  | gi 37999491 sp Q07912  [GVKKPTYDPVSED Y 5   |
| 3052 VEGDNIYVRHSNL  | gi 17432978 sp O43491 I NA                  |
| 3053 EDRDLLYSIDAYR  | gi 90111962 sp Q9NQW  [EDRDLLYSIDAYR Y 66   |
| 3054 QEDGGVYSSSGLK  | gi 97536202 sp P16591 F [QEDGGVYSSSGLK Y 7  |
| 3055 SSKLQQYEEIIQS  | gi 11387251 sp O43264  NA                   |
| 3056 DACQKVYLRVPSH  | gi 2493422 sp Q08554 D NA                   |
| 3057 AEVRTQYEEIAQR  | gi 547752 sp Q01546 K2 NA                   |
| 3058 LDAETAYPNLIFS  | gi 8928170 sp O15553 M NA                   |
| 3059 RVDSQEYANIRSA  | gi 9297020 sp Q13402 M NA                   |
| 3060 PTGNHTYQEIAVP  | gi 27735219 sp P49023 F [PTGNHTYQEIAVP Y 40 |
| 3061 TEMFEVYGTGVD   | gi 56757696 sp Q9ULW NA                     |
| 3062 NRIQGGYENVPTI  | gi 78099790 sp Q02809 I NA                  |
| 3063 QNVGEVYGVVKAY  | gi 21264498 sp P30520 F NA                  |
| 3064 HWVYKYPNVFKK   | gi 92090640 sp O43865  NA                   |
| 3065 RGEGMRYIIILD   | gi 267050 sp P14410 SU NA                   |
| 3066 ELRVSYENVVIKA  | gi 13638438 sp P54577  NA                   |
| 3067 TATKDTYDALHMQ  | gi 23830999 sp P20963 C [TATKDTYDALHMQ Y 1  |

3068 TATKDTYDALHMQ gj|23830999|sp|P20963|C|TATKDTYDALHMQ|Y|1|  
3069 LSTYALYVNLVCS gj|20138087|sp|Q9Y271| NA  
3070 HSFSSGYVEMEFE gj|729008|sp|Q08345|DD NA  
3071 FLPVPEYINQSVP gj|2811086|sp|P00533|E|FLPVPEYINQSVP|Y|10|  
3072 TVNTICYLNLALA gj|38258904|sp|P25089|F NA  
3073 GNESHPLYLNKDGS gj|123294766|emb|CAI1| NA  
3074 NVSENIYFLIDGS gj|113414409|ref|XP\_497 NA  
3075 TSLMNQYVNKKFS gj|1709999|sp|P51149|R NA  
3076 DRKKDQYKVGVL gj|85681919|sp|P08603|C NA  
3077 GCGETIYVIGQGS gj|152031617|sp|O00178 NA  
3078 HNKMEIYADIIGS gj|94730676|sp|Q8NEZ3 NA  
3079 CSNNPSYIDRLIS gj|116242829|sp|Q9Y4A| NA  
3080 GICCQKYVKANIS gj|1346659|sp|P48764|SI NA  
3081 LCFELDYEPAHIS gj|50403805|sp|Q9UDY6 NA  
3082 RPSCVPYKYVPIS gj|51338749|sp|O95972|I NA  
3083 YKSDSYTPSKIS gj|34395509|sp|Q9UM13 NA  
3084 LHGEEDYLKRHKS gj|143458429|sp|Q9P2F| NA  
3085 FLNEESYFYLNQS gj|44887888|sp|Q9N2J9| NA  
3086 PKSPEEYQCSGVL gj|74759883|sp|Q8N4P6| NA  
3087 STIEFGYLDYAQS gj|6685604|sp|Q9Y259|C NA  
3088 CECKEHYQNFVPG gj|145559531|sp|Q8WW| NA  
3089 QKIHDYEHRYQG gj|108935843|sp|Q9UL5| NA  
3090 CAYAPTYVVKDFP gj|74712926|sp|Q76KP1| NA  
3091 EEKNTMYMQNTVS gj|41688581|sp|Q86VS8| NA  
3092 DESKNWYESQASC gj|128370|sp|P26718|NK NA  
3093 EGIKTGYASKTRC gj|74730685|sp|Q8WUB| NA  
3094 HDGMEAYVKVDSC gj|119767|sp|P00451|FA| NA  
3095 TRECDEYGHSDSC gj|119613269|gb|EAW92 NA  
3096 GKKEEAYELVRRG gj|57012969|sp|Q9BXJ9| NA  
3097 GQPASKYLRVNPJ gj|24418671|sp|Q8TAG9 NA  
3098 SRLGNQYVNVMMN gj|67472674|sp|Q07837| NA  
3099 TEAGKTYEEIASL gj|12643956|sp|Q9Y5X1| NA  
3100 VTTEAIYEEIDAH gj|25091352|sp|O75674| NA  
3101 LEGNVGYLRVDSV gj|124894|sp|P10745|IRE NA  
3102 DAEKPFYVNVFEH gj|143811366|sp|P11274|DAEKPFYVNVFEH|Y|17|  
3103 IESSPQYRLRIAM gj|52000729|sp|Q8WWW|IESSPQYRLRIAM|Y|30|  
3104 LLEQQKYTVTVDY gj|14285497|sp|O14920|I NA  
3105 PPFKSAYSSFVNL gj|47117931|sp|Q9Y2I7|F|PPFKSAYSSFVNL|Y|46|  
3106 RTPYEAYDPIGKY gj|54036152|sp|Q96J84|I|RTPYEAYDPIGKY|Y|72|  
3107 TRICKIYDSPCLP gj|548663|sp|Q06609|RA|TRICKIYDSPCLP|Y|315|  
3108 YQKLYTYIQRIFY gj|150421544|sp|O43781|YQKLYTYIQRIFY|Y|36|  
3109 LAEGSAYEEVPTS gj|130225|sp|P19174|PL|LAEGSAYEEVPTS|Y|47|  
3110 DKPKQEYLNPEE gj|3913590|sp|Q15303|E NA  
3111 STGSVDYLALDFQ gj|46396035|sp|Q9UQC2|STGSVDYLALDFQ|Y|61|  
3112 ASREGKYIPLPQR gj|52000729|sp|Q8WWW|ASREGKYIPLPQR|Y|34|  
3113 DMGDEVYDDVDTS gj|6166197|sp|O15117|F|DMGDEVYDDVDTS|Y|6|  
3114 PLDSTFYRSLLED gj|119533|sp|P04626|ER NA  
3115 PALAKGYLKQDPL gj|3024000|sp|Q13651|I1|PALAKGYLKQDPL|Y|49|  
3116 PRPDHIYDKPEGV gj|3043919|gb|AAC1326| NA  
3117 RGLPSDYGRPLSF gj|119595261|gb|EAW74|RGLPSDYGRPLSF|Y|1|  
3118 SSRVLYADYRAP gj|54036152|sp|Q96J84|I|SSRVLYADYRAP|Y|62|  
3119 VPPQGLYDLPREP gj|17366642|sp|Q99704|I|VPPQGLYDLPREP|Y|3|



|                     |                                             |
|---------------------|---------------------------------------------|
| 3120 DPCTTIYVAATEP  | gi 9297047 sp Q13291 S [DPCTTIYVAATEP Y 30  |
| 3121 RYQKDVDYDIPPSH | gi 8134360 sp Q14511 C NA                   |
| 3122 SSANAIYSLAARP  | gi 115855 sp P22681 CB [SSANAIYSLAARP Y 67  |
| 3123 TFIGEHYVHV NAT | gi 125484 sp P08581 ME [TFIGEHYVHV NAT Y 13 |
| 3124 TSAGDRYDSSLGR  | gi 41017262 sp O14974 I [TSAGDRYDSSLGR Y 9  |
| 3125 VEEVPLYGNLHYL  | gi 74753488 sp Q9Y3P8  [VEEVPLYGNLHYL Y 90  |
| 3126 ASDGKLYVSSSR   | gi 85681908 sp P00519 / [ASDGKLYVSSSR Y 1   |
| 3127 RLPKPYDIVKSG   | gi 110816441 sp Q8IWB  NA                   |
| 3128 LPDNDPYDNL CYL | gi 23396800 sp Q9NTG1 NA                    |
| 3129 AVSTPDYGEKKLP  | gi 61214417 sp Q9Y661  NA                   |
| 3130 LNTGPPYCDPTLP  | gi 4033376 sp Q14524 S NA                   |
| 3131 VESNGRYISVLKV  | gi 74756617 sp Q5THJ4  NA                   |
| 3132 KFPKGDYTCCDLV  | gi 143377520 sp Q96M0  NA                   |
| 3133 AQS NPYYNGPHLN | gi 45477156 sp Q8WW11 NA                    |
| 3134 KV KELTYQTEEDR | gi 13638390 sp P12882  NA                   |
| 3135 YSSPGLYSKTMTP  | gi 38258220 sp Q96AC1  NA                   |
| 3136 LDCTNPYYLAAGS  | gi 62751417 ref NP_776  NA                  |
| 3137 TRDSRTYSVGVCT  | gi 60416403 sp P11717  NA                   |
| 3138 WGSSPTYGPRSTP  | gi 5870130 gb AAD5448  [WGSSPTYGPRSTP Y 1   |
| 3139 GPLSPAYTGQVPY  | gi 112382252 ref NP_84  NA                  |
| 3140 STDNIKYQPKGGQ  | gi 51338754 sp P11137  NA                   |
| 3141 TMSVDRYI AVCHP | gi 2851402 sp P35372 O NA                   |
| 3142 EGRLSFYSGHSSF  | gi 45477007 sp O14494 I NA                  |
| 3143 NSLSTSYKT VSLP | gi 119582458 gb EAW62 NA                    |
| 3144 KIVI QKYHTVNGH | gi 133254 sp P09651 RO NA                   |
| 3145 ITDNFCYFRHADP  | gi 12644465 sp Q92949 I NA                  |
| 3146 NFKVMIIYQDEVKL | gi 56749614 sp Q6NZI2 I NA                  |
| 3147 KTFVEKYEKQIKH  | gi 21542000 sp Q16543  NA                   |
| 3148 HASQKDYSSGFGG  | gi 2498954 sp Q14247 S NA                   |
| 3149 DDLMPVYCGNEVT  | gi 118573679 sp Q96DV  NA                   |
| 3150 TVLKIFYQTCRAV  | gi 17375734 sp O14976  NA                   |
| 3151 RSNPQVYMDIKIG  | gi 13124097 sp Q9UNP9 NA                    |
| 3152 PKEEADYEDDFLE  | gi 24418367 sp Q9UPY3 NA                    |
| 3153 VMSVDRYLAVVHP  | gi 12644225 sp P35346  NA                   |
| 3154 SRGLFY YANEKS  | gi 122070147 sp Q86WV NA                    |
| 3155 KEKSHSYRTDNCS  | gi 71152386 sp Q96NH3 NA                    |
| 3156 VYEEP VYEEVGAF | gi 73619965 sp Q8WWN NA                     |
| 3157 EMRRLNYQTPGMR  | gi 125978 sp P10586 PT  NA                  |
| 3158 LKTKSQYHDLQAP  | gi 74725117 sp Q9H788  NA                   |
| 3159 RKNLDPYEQWSDQ  | gi 147744553 sp P13569 NA                   |
| 3160 GRGTAQYSSQKSV  | gi 20139105 sp Q99959 I NA                  |
| 3161 REQLIDYLMKVA   | gi 116242614 sp Q96RT  NA                   |
| 3162 WGIDEIYLESCCQ  | gi 24418855 sp Q92953 I [WGIDEIYLESCCQ Y 12 |
| 3163 QGNQLNYYKQEIP  | gi 24418367 sp Q9UPY3 NA                    |
| 3164 AGTTATYEGRWGR  | gi 20139105 sp Q99959 I NA                  |
| 3165 DPIAMEYYNWGRF  | gi 74752543 sp Q9GZY6 NA                    |
| 3166 EH SKRGYYGQSAR | gi 13634076 sp Q9UDY2 NA                    |
| 3167 DSFSDPYAIVSFL  | gi 20137708 sp O75923 I NA                  |
| 3168 LDPTVEYVKFSKE  | gi 74739634 sp O75815 I NA                  |
| 3169 QVGTARYMAPEVL  | gi 116242818 sp P37173 [QVGTARYMAPEVL Y 4   |
| 3170 RNMELTYLNP MGL | gi 22095552 sp Q9NYQ7 NA                    |
| 3171 LDCSIGIYVDHL   | gi 124945 sp P13612 IT NA                   |

|      |                 |                                             |
|------|-----------------|---------------------------------------------|
| 3172 | QERTVAYINVDIS   | gi 20139287 sp Q9UQQ1NA                     |
| 3173 | LATSGDYLRVWRV   | gi 48428729 sp P61962 NA                    |
| 3174 | SRAGILYINPADL   | gi 12643822 sp Q9NYC9NA                     |
| 3175 | KLKEIVYPNIEET   | gi 12644410 sp Q13614 NA                    |
| 3176 | LKGNEDYINANYI   | gi 131531 sp P29074 PT NA                   |
| 3177 | PSQDSDYINANFI   | gi 50403764 sp Q05209 NA                    |
| 3178 | DDPCSDYINASYI   | gi 126469 sp P23467 PT NA                   |
| 3179 | GQEYTDYINASFI   | gi 126471 sp P23469 PT NA                   |
| 3180 | NKHKNRYINIVAY   | gi 400199 sp P23471 PT NA                   |
| 3181 | VSETDDYAEIIDE   | gi 3183518 sp Q05397 F,[VSETDDYAEIIDE Y 397 |
| 3182 | SLGASPYPNLSNQ   | gi 115502390 sp P07332NA                    |
| 3183 | DHKNGHYIIPQMA   | gi 45645212 sp Q9Y2X7 NA                    |
| 3184 | EEELSNYICMGGK   | gi 547738 sp P35568 IR€[EEELSNYICMGGK Y 4€  |
| 3185 | PSSRGDYMTMQMS   | gi 547738 sp P35568 IR€NA                   |
| 3186 | YVAIKAYTAVEGD   | gi 127946 sp P14598 NCNA                    |
| 3187 | DYITAAYVEMRRE   | gi 20981696 sp P33993 NA                    |
| 3188 | DYARRSYANIKEK   | gi 12644536 sp Q99551 NA                    |
| 3189 | QLLSENYTAVAQT   | gi 38372376 sp Q8IXH7 NA                    |
| 3190 | GGLPMPYPNLAPD   | gi 19863082 sp Q12972 NA                    |
| 3191 | SLPLEYYLIPFLI   | gi 21362880 sp O43567 NA                    |
| 3192 | WYLQDPYPNPSKK   | gi 115502450 sp O95475NA                    |
| 3193 | DEDLAAYCRRRDI   | gi 1705945 sp P09543 C NA                   |
| 3194 | QKNLEGYVGFANL   | gi 67472677 sp Q16181 NA                    |
| 3195 | EDAPVVYLGSRFG   | gi 118573870 sp Q86YV NA                    |
| 3196 | QARERDYAEIQDF   | gi 30913162 sp Q8TEWC NA                    |
| 3197 | VRIGSGYDNVDIK   | gi 3182976 sp P56545 C NA                   |
| 3198 | IRGSTPYRHGDSV   | gi 117315 sp P20023 CRNA                    |
| 3199 | EKNPLMYLTGVQT   | gi 124942 sp P17301 ITANA                   |
| 3200 | VSKKVSYSHIQSK   | gi 20455500 sp P27816 NA                    |
| 3201 | KPREEQYNSTFRV   | gi 34364807 emb CAE45NA                     |
| 3202 | SLHKGDYNDVSVQV  | gi 46576868 sp O95490 NA                    |
| 3203 | FCQESGYDTILRV   | gi 399328 sp Q02153 GCNA                    |
| 3204 | VKMKDSYFWIALQ   | gi 62988664 gb AAAY240€NA                   |
| 3205 | GVSENCYRAVPSV   | gi 12856007 dbj BAB305NA                    |
| 3206 | MVSTVDYEDYQSV   | gi 62286460 sp Q13535 NA                    |
| 3207 | GDDTNEYVSAVCW   | gi 55976539 sp Q8NHY2NA                     |
| 3208 | KTRSSSYLDNLAW   | gi 2499596 sp Q16659 MNA                    |
| 3209 | LPDLEFYVNLGDW   | gi 110810398 sp Q7Z4H NA                    |
| 3210 | LTVEEKYPYMVEW   | gi 117949804 sp Q9H0P NA                    |
| 3211 | SLDEEHYNRQEEW   | gi 42558898 sp Q7Z7G8 NA                    |
| 3212 | CLFMESYKVVSGW   | gi 8247951 sp P23759 P NA                   |
| 3213 | ALAETSYPYKVVLEY | gi 1170855 sp P43355 MNA                    |
| 3214 | FLEEDHYLAPDFY   | gi 1708004 sp Q10469 MNA                    |
| 3215 | LKKKPEYHCMNFY   | gi 18996327 emb CAD24NA                     |
| 3216 | TWREFHYIQGGEY   | gi 51095023 gb EAL242€NA                    |
| 3217 | CSSWYYYYVTMPMP  | gi 61211648 sp Q8N6M6NA                     |
| 3218 | PVQKELYKTVTLQ   | gi 20141038 sp Q9HBT7NA                     |
| 3219 | AENDEFYANNMYL   | gi 23396937 sp Q9NRW NA                     |
| 3220 | LCSCPPYKYKLRY   | gi 150383497 sp Q9UGLNA                     |
| 3221 | SRHCPFYVSIQSY   | gi 48428180 sp Q9UJ42 NA                    |
| 3222 | DVNSDDYKGDVY    | gi 67462100 sp Q5VYS8 NA                    |
| 3223 | IQYNGTYDDTLVY   | gi 116242620 sp Q96NI6NA                    |

|      |               |                                             |
|------|---------------|---------------------------------------------|
| 3224 | CQNQGKYEEVEYY | gi 585363 sp Q07866 KL NA                   |
| 3225 | HDQDPGYMHHKFA | gi 119576122 gb EAW55 NA                    |
| 3226 | LVGAPEYECYAPD | gi 146334837 sp Q8N0V NA                    |
| 3227 | APPDDLFLFPTPD | gi 3073775 dbj BAA2576 NA                   |
| 3228 | DRSNYEYSEVTQD | gi 21755273 dbj BAC046 NA                   |
| 3229 | LWEEAAYDQSLPD | gi 54035724 sp Q8WZ55 NA                    |
| 3230 | AANYEPYVVVPRD | gi 146345450 sp Q8N3Y NA                    |
| 3231 | LSWELLYATNDDE | gi 116243177 sp Q63HM NA                    |
| 3232 | DVFEFRYAKMPDE | gi 12230989 sp P25440 E NA                  |
| 3233 | LTFCLEYEQHPDE | gi 47117837 sp P26374 F NA                  |
| 3234 | FGCRPEYDNGLEE | gi 120660054 gb AAI304 NA                   |
| 3235 | VQKRPNYKNVGEE | gi 125950459 sp Q2KHT NA                    |
| 3236 | PWVESEYLDYLFE | gi 55976528 sp Q8IU57 I NA                  |
| 3237 | PRNCERYLNWAHA | gi 7706095 ref NP_0576 NA                   |
| 3238 | ASRKGLYLCVGNE | gi 26006900 sp Q8WU6 NA                     |
| 3239 | KFRKVYKAVYNE  | gi 149273101 ref XP_001 NA                  |
| 3240 | ELPCDDYGYAPPE | gi 116242783 sp Q1277C NA                   |
| 3241 | LRSEKSYSQETYL | gi 149193321 ref NP_00 NA                   |
| 3242 | PSSSVPYMSPNQE | gi 56404909 sp Q8NF64 NA                    |
| 3243 | <<Marker>>    | contol_spot NA                              |
| 3244 | QVPDDIYHSPSWE | gi 109079698 ref XP_001 NA                  |
| 3245 | GRSWESYSSCGDF | gi 27805716 sp Q15414 I NA                  |
| 3246 | LKSVEQYHEHNAF | gi 18202258 sp O94892  NA                   |
| 3247 | VESFSDYPSLGCF | gi 927065 gb AAC09385 NA                    |
| 3248 | AYGEIYYDSNPDF | gi 117949793 sp Q9NT6 NA                    |
| 3249 | KFEVEKYIVHKEF | gi 137119 sp P00750 TP NA                   |
| 3250 | NECKDIYQKSTVL | gi 1171882 sp P46721 S NA                   |
| 3251 | IFDNGLYDEKPLT | gi 34098715 sp Q9H7Z3 NA                    |
| 3252 | PGAEPFYIRANLT | gi 116241281 sp Q9BWT NA                    |
| 3253 | AYYESGYNTTAPT | gi 18204355 gb AAH217 NA                    |
| 3254 | FTESSSYVEKYNT | gi 76789660 sp Q9ULL0 NA                    |
| 3255 | IDTREEYEMKDPT | gi 54036152 sp Q96J84  NA                   |
| 3256 | ADCNFSYTSSRDA | gi 119576383 gb EAW55 NA                    |
| 3257 | VTDEEIYYVAKDA | gi 152031686 sp Q8TF01 NA                   |
| 3258 | LHEFPQYVKTHLA | gi 62299063 sp Q7RTX0 NA                    |
| 3259 | TVSSLDYSRDGLA | gi 119576383 gb EAW55 NA                    |
| 3260 | GRASPLYASYKAD | gi 62511244 sp Q9BUH8 NA                    |
| 3261 | LYCKYEFDLAAD  | gi 145309317 ref NP_68 NA                   |
| 3262 | NLSMERYALVFGV | gi 12643426 sp O60779  NA                   |
| 3263 | AESELDYDFVFIV | gi 150421588 sp Q15345 NA                   |
| 3264 | <<Marker>>    | contol_spot NA                              |
| 3265 | EVEFIDYGNSAIV | gi 118572727 sp O60522 NA                   |
| 3266 | LDSKYAYIQVTHV | gi 24212635 sp Q9BZ29 NA                    |
| 3267 | PRSVDSYSSTQHV | gi 66774203 sp P18850  NA                   |
| 3268 | APDFSDYSEMAKV | gi 17369290 sp Q9NQC3 NA                    |
| 3269 | SKQYAGYDYSQQG | gi 74760683 sp Q969M3 [SKQYAGYDYSQQG Y  NA  |
| 3270 | ASSQETYGKSPFW | gi 74723330 sp Q7Z4G4 [ASSQETYGKSPFW Y 4 NA |
| 3271 | NLNTITYETLKYI | gi 20532033 sp O75575 I NA                  |
| 3272 | REPPPAYEPPAPA | gi 21542431 sp O14828 [REPPPAYEPPAPA Y 5 NA |
| 3273 | DIDEGLYSRQLYV | gi 24418865 sp P22314 [DIDEGLYSRQLYV Y 5 NA |
| 3274 | LDNGGGYISPRIT | gi 125480 sp P07948 LYI NA                  |
| 3275 | NREKNRYRDILPF | gi 55959180 emb CAI14 NA                    |

|      |                |                                            |
|------|----------------|--------------------------------------------|
| 3276 | SGINDDYGQLKNF  | gi 74762960 sp O60934 I NA                 |
| 3277 | ISCSPGYHNGVVF  | gi 10834698 gb AAG237 NA                   |
| 3278 | ASANNSYCVIGIA  | gi 129542 sp P29122 PC NA                  |
| 3279 | RCPNGDYCSNRRF  | gi 116256077 sp Q9BYW NA                   |
| 3280 | FDNSPDYCVLDKA  | gi 14424481 sp Q93097  NA                  |
| 3281 | CTHEHDYEVVFPH  | gi 74741766 sp Q5JQS6  NA                  |
| 3282 | HLYSDHYSPSGRH  | gi 74762456 sp Q86WS5 NA                   |
| 3283 | TPTDNEYGAWKRH  | gi 119568293 gb EAW47 NA                   |
| 3284 | HYEHGGYERPPSH  | gi 20978536 sp Q9GZY0 NA                   |
| 3285 | <<Marker>>     | contol_spot NA                             |
| 3286 | TPCELTYKVPTRH  | gi 148841209 sp Q6ZU6 NA                   |
| 3287 | RRPQGSYEEAGTH  | gi 115311311 sp Q6ZMV NA                   |
| 3288 | WTRENTYVEYSII  | gi 119625348 gb EAX04 NA                   |
| 3289 | FYQNEDYNERPKI  | gi 119616245 gb EAW95 NA                   |
| 3290 | GNSMVIYVILRYA  | gi 401124 sp P30872 SS NA                  |
| 3291 | NGSFDMYVCWDYA  | gi 1346133 sp P48546 G NA                  |
| 3292 | VKPSHLYVTIPYA  | gi 50401058 sp Q8IU89 L NA                 |
| 3293 | LYWGGSYTSMGLI  | gi 115964 sp P15813 CD NA                  |
| 3294 | ESEKEWYFGNADK  | gi 83302113 sp O75165 I NA                 |
| 3295 | GRNCYEYVDGKDK  | gi 17369297 sp Q9NQV7 NA                   |
| 3296 | AVDEVYDKTAEK   | gi 152032608 sp Q2TAK NA                   |
| 3297 | NFNMGEYDSNMEK  | gi 56404449 sp P78316  NA                  |
| 3298 | CNSDDPYNPLNFK  | gi 119611917 gb EAW91 NA                   |
| 3299 | GFNYEIYVAPDHK  | gi 25090493 sp O43424  NA                  |
| 3300 | GLSKNPYLSVKQK  | gi 93186129 sp Q92665 I NA                 |
| 3301 | IVSEEAYILFVRK  | gi 73620993 sp Q9Y2L1  NA                  |
| 3302 | IGEMPSYDLVLSK  | gi 33860178 sp O15226 I NA                 |
| 3303 | CHIGDLYVDLRDG  | gi 17368942 sp Q9H254  NA                  |
| 3304 | RRGDFIYVDIFEG  | gi 74710277 sp Q6UVK1 NA                   |
| 3305 | LESPLKYLDTPTK  | gi 119620108 gb EAW99 NA                   |
| 3306 | <<Marker>>     | contol_spot NA                             |
| 3307 | LIKEFKYALVWGL  | gi 6685390 sp Q9Y295 D NA                  |
| 3308 | YLSDIAYKSTEHL  | gi 6136393 sp Q14191 V NA                  |
| 3309 | WGEWDEYSATCGM  | gi 22760486 dbj BAC112 NA                  |
| 3310 | KCNESLYGRKYIQ  | gi 8489005 sp Q13643 FI NA                 |
| 3311 | CGFEATYLELASA  | gi 74732925 sp Q9BRT3 NA                   |
| 3312 | TVVELKYTGNASA  | gi 112874 sp P01011 AA NA                  |
| 3313 | LLSAELYCRAGSL  | gi 115528764 gb AAI252 NA                  |
| 3314 | TLYEINYKAVGSL  | gi 117949771 sp O14522 NA                  |
| 3315 | KELEAKYENSIIM  | gi 74710067 sp Q6R2W NA                    |
| 3316 | RRFTEIYEFHCTL  | gi 127946 sp P14598 NC NA                  |
| 3317 | LLQETLYMCGVIM  | gi 5921731 sp O95067 C NA                  |
| 3318 | PIHCPDYLRSAKM  | gi 149274624 ref NP_11 NA                  |
| 3319 | PSDKFIYATVKQS  | gi 548377 sp Q05586 NV NA                  |
| 3320 | QEDGGVYSSSGLK  | gi 97536202 sp P16591 F [QEDGGVYSSSGLK Y 7 |
| 3321 | QRDSSYYWEIEAS  | gi 125651 sp P04049 RA [QRDSSYYWEIEAS Y 3  |
| 3322 | RGPEENYSRPEAP  | gi 3334210 sp O15379 H NA                  |
| 3323 | RKDRMSYHVRSHD  | gi 3024110 sp P56270 M NA                  |
| 3324 | RSPLSDYMNLDIFS | gi 62298062 sp Q9Y4H2  NA                  |
| 3325 | DLEFTIYDDDDVS  | gi 130848 sp P25786 PS NA                  |
| 3326 | DTSDPTYTSSLGG  | gi 1706663 sp P54762 EI [DTSDPTYTSSLGG Y 7 |
| 3327 | <<Marker>>     | contol_spot NA                             |

|      |                |                         |                      |
|------|----------------|-------------------------|----------------------|
| 3328 | EAPEDLYKDFLTL  | gj 9087218 sp P35968 V  | [EAPEDLYKDFLTL Y 99  |
| 3329 | EEELSNYICMGGK  | gj 547738 sp P35568 IR  | €[EEELSNYICMGGK Y 4€ |
| 3330 | EIGVGAYGTVYKA  | gj 1168867 sp P11802 C  | NA                   |
| 3331 | EPKDDAYPLYSDF  | gj 90110048 sp P06401 F | NA                   |
| 3332 | KVDEVLYEDSSTA  | gj 1706921 sp P49914 M  | NA                   |
| 3333 | VVDADEYLIPQQG  | gj 2811086 sp P00533 E  | [VVDADEYLIPQQG Y 1C  |
| 3334 | TAENAEYLRVAPQ  | gj 2811086 sp P00533 E  | [TAENAEYLRVAPQ Y 11  |
| 3335 | AFDNLYYWDQDPP  | gj 119533 sp P04626 ER  | [AFDNLYYWDQDPP Y 1   |
| 3336 | LAVSEEYLDLRLT  | gj 13432140 sp P22455 F | [LAVSEEYLDLRLT Y 75- |
| 3337 | PEGGVYKNIHLE   | gj 547770 sp P07333 CS  | [PEGGVYKNIHLE Y 69   |
| 3338 | VDGKEIYNTIRRK  | gj 121743 sp P20936 RA  | [VDGKEIYNTIRRK Y 46€ |
| 3339 | ENEDDGVDVPKPP  | gj 115855 sp P22681 CB  | [ENEDDGVDVPKPP Y 7   |
| 3340 | HQLRIQYGTSGKG  | gj 115311627 sp P28370  | NA                   |
| 3341 | RVGTRKRYMAPEVL | gj 119631843 gb EAX11-  | NA                   |
| 3342 | ETSKLIYDFIEDQ  | gj 1722836 sp P42768 W  | [ETSKLIYDFIEDQ Y 291 |
| 3343 | NFMMTPYVVTRY   | gj 85700366 sp P45984 N | [NFMMTPYVVTRY Y 1.   |
| 3344 | FCRESRYMDQWVP  | gj 120751 sp P24522 GA  | NA                   |
| 3345 | SIFTPEYDDSRIR  | gj 97536681 sp Q9Y2U5   | NA                   |
| 3346 | LHREEMYIFMEYC  | gj 6685621 sp Q9Y6R4 N  | NA                   |
| 3347 | RIRMGQYEFNPPE  | gj 1346538 sp P49137 M  | NA                   |
| 3348 | <<Marker>>     | contol_spot             | NA                   |
| 3349 | FSPDGKYLASGSD  | gj 110282967 sp P32479  | NA                   |
| 3350 | PSDYGDYVKKPRV  | gj 586313 sp P38128 SM  | NA                   |
| 3351 | DQENCVYETVVLP  | gj 74725796 sp Q53EL6   | NA                   |
| 3352 | SGVSYGYWGCAIG  | gj 130859 sp P25788 PS. | NA                   |
| 3353 | THTVPIYEGYALP  | gj 117167827 gb AAI130: | [THTVPIYEGYALP Y 16€ |
| 3354 | EGDNVNYDWHWD   | gj 67465046 sp Q04446 € | [EGDNVNYDWHWD Y      |
| 3355 | RWYPEEYEFAPKK  | gj 116242694 sp Q9Y3B€  | [RWYPEEYEFAPKK Y 1   |
| 3356 | EVTICNYEASANP  | gj 74752536 sp Q9GZP4   | [EVTICNYEASANP Y 18  |
| 3357 | LDPVEVYESLPEE  | gj 21542000 sp Q16543 € | [LDPVEVYESLPEE Y 29  |
| 3358 | ATENDIYNFFSPL  | gj 1710632 sp P31943 HI | [ATENDIYNFFSPL Y 30€ |
| 3359 | LKVLYQYKEKQYM  | gj 45476775 sp O95373 I | NA                   |
| 3360 | PMDTSVYESPYSD  | gj 1177044 sp P43403 Z  | [PMDTSVYESPYSD Y 3-  |
| 3361 | SVYESPYSDPEEL  | gj 1177044 sp P43403 Z  | [SVYESPYSDPEEL Y 31  |
| 3362 | HSGENPYECLECG  | gj 14548338 sp O43296 ; | [HSGENPYECLECG Y 3   |
| 3363 | GPEQEEYSTFVID  | gj 13959562 sp Q14644 I | [GPEQEEYSTFVID Y 76  |
| 3364 | DNDDDLYG       | gj 6094447 sp P55072 T  | [DNDDDLYG Y 805 P55€ |
| 3365 | PASVTDYQNVSFS  | gj 20138768 sp Q9NZM3   | NA                   |
| 3366 | PQYNIQYSSSAAV  | gj 116242614 sp Q96RT   | [PQYNIQYSSSAAV Y 98  |
| 3367 | EGDYLSYREFHSA  | gj 116242614 sp Q96RT   | [EGDYLSYREFHSA Y 1-  |
| 3368 | ESLESYFTPIPA   | gj 145559510 sp Q1498€  | [ESLESYFTPIPA Y 177  |
| 3369 | <<Marker>>     | contol_spot             | NA                   |
| 3370 | PPAEDVYDVPPPA  | gj 8134339 sp P56945 B  | NA                   |
| 3371 | PPAPDLYDVPPGL  | gj 8134339 sp P56945 B  | [PPAPDLYDVPPGL Y 37  |
| 3372 | RVKEEGYELPYNP  | gj 17366642 sp Q99704 I | [RVKEEGYELPYNP Y 3€  |
| 3373 | TQDSGFY        | gj 41019126 sp P60228 I | [TQDSGFY Y 445 P6022 |
| 3374 | EVGTGQYATTKGI  | gj 17433099 sp Q9Y2J2 I | [EVGTGQYATTKGI Y 47  |
| 3375 | PLDGSPYAQVQRP  | gj 150416153 sp Q63HR:  | NA                   |
| 3376 | QLKEPSYSDPISH  | gj 1177049 sp P46974 Z  | NA                   |
| 3377 | SISSPSYSSPSFS  | gj 544474 sp P14064 HA  | NA                   |
| 3378 | DQKKPFYEEFRTN  | gj 547746 sp P33417 IX  | NA                   |
| 3379 | SAKELGYENGLED  | gj 114834 sp P22035 BA  | NA                   |

|      |                |                                            |
|------|----------------|--------------------------------------------|
| 3380 | DTQDEEYVQHHDN  | gi 113022 sp P21192 AC NA                  |
| 3381 | IHCNSVYECIKFL  | gi 3123263 sp P48743 R  NA                 |
| 3382 | LKWDYTYANMTFQ  | gi 90110827 sp P17181 I NA                 |
| 3383 | YLFMGDYVDRGY   | gi 54038809 sp P67775 F NA                 |
| 3384 | MVRMAAYTDEGGK  | gi 729833 sp P40189 IL6 NA                 |
| 3385 | AEDNLEYVRTLYD  | gi 1169094 sp P46109 C  NA                 |
| 3386 | AENDDTYKDDVNH  | gi 148887396 sp Q13233 NA                  |
| 3387 | GAEEGIYTLNLHE  | gi 45593475 sp Q12851 I NA                 |
| 3388 | PLRNEKYLASVAA  | gi 62901464 sp Q92547  NA                  |
| 3389 | QTVFPDYTPNCA   | gi 21431783 sp O43451 I NA                 |
| 3390 | <<Marker>>     | contol_spot NA                             |
| 3391 | ADDES DYCVLYM  | gi 119579897 gb EAW59 NA                   |
| 3392 | DQCKDGYIGPNCN  | gi 116242627 sp Q9H1U NA                   |
| 3393 | GSSCNKYERLKAN  | gi 57015325 sp Q9Y6U3  NA                  |
| 3394 | IQDMTG YKNFSCN | gi 74760489 sp Q8TDW( NA                   |
| 3395 | GQRECDYSIDGIN  | gi 26400725 sp Q9Y4G6 NA                   |
| 3396 | LDKEEQYMQWKIN  | gi 119600046 gb EAW79 NA                   |
| 3397 | TVEGNTYVTNVHN  | gi 114646051 ref XP_001 NA                 |
| 3398 | CLGEDLYNSSLKN  | gi 23821932 sp Q8TDX9 NA                   |
| 3399 | FSSMEYSSCHKN   | gi 44887883 sp Q14264 I NA                 |
| 3400 | LLSMNLYELIKKN  | gi 148887370 sp Q92630 NA                  |
| 3401 | RWRKPTYSDKAQN  | gi 133777742 gb AAI104 NA                  |
| 3402 | AYYDVDYEKNAKG  | gi 2507461 sp P30101 PI NA                 |
| 3403 | ERFWESYIYNGKG  | gi 20140421 sp O14669  NA                  |
| 3404 | GEFEDY YEGLSIG | gi 124297121 gb AAI317 NA                  |
| 3405 | HSCKEGYVKDLKG  | gi 24638219 sp Q96KP1  NA                  |
| 3406 | LESDCYEKEAKG   | gi 119569941 gb EAW49 NA                   |
| 3407 | IDWGEEYSNSGGG  | gi 22256935 sp Q96TA1  NA                  |
| 3408 | FWDEFGYLSANWN  | gi 114152840 sp Q9Y6X( NA                  |
| 3409 | GSSQDTYVLHLVN  | gi 23397655 ref NP_115( NA                 |
| 3410 | MEVSSKYVKLNWN  | gi 146345397 sp Q99715 NA                  |
| 3411 | PRGTPEYVKFARQ  | gi 148877240 sp P20648 NA                  |
| 3412 | IVTVDGYVDPSGG  | gi 13959561 sp Q13485 ( NA                 |
| 3413 | PMDENCYEQMKAR  | gi 74749223 sp Q6PIZ9  NA                  |
| 3414 | SLEEEKYDMSGAR  | gi 12231007 sp P31944 ( NA                 |
| 3415 | TTKHPDYAILAAR  | gi 132608 sp P23921 RIF NA                 |
| 3416 | AEEWGQYVDLPKG  | gi 119371160 sp Q96CN NA                   |
| 3417 | QWYKPHYQNSGGG  | gi 143811435 sp Q13370 NA                  |
| 3418 | FLLDSDYERIELG  | gi 26454656 sp O95248 I NA                 |
| 3419 | CGSSDSYVGYNDR  | gi 119587532 gb EAW67 NA                   |
| 3420 | HMSEFAYTRNYDR  | gi 3954897 emb CAA101 NA                   |
| 3421 | VPKEDIYSGGGGG  | gi 8134660 sp Q13151 R [VPKEDIYSGGGGG Y 1: |
| 3422 | SLSDPCYYNKVDR  | gi 12644413 sp Q14202 ( NA                 |
| 3423 | VMDDELGYMYFRDR | gi 74749156 sp Q6PCB7 NA                   |
| 3424 | EADEKTYNDALFR  | gi 20532022 sp Q9NY35  NA                  |
| 3425 | FEVEDGYDLEAVL  | gi 12643252 sp Q9UIV8 ( NA                 |
| 3426 | GSYSPGYAKINKR  | gi 17433089 sp Q9UHC6 NA                   |
| 3427 | IQVEEPYDCHEC   | gi 74762724 sp Q9GZU2 NA                   |
| 3428 | LQCPDGYAIGSEC  | gi 56405374 sp Q13219 I NA                 |
| 3429 | PVMEFDYVICEEC  | gi 139816 sp P23025 XP NA                  |
| 3430 | RSFSSDYTHLPEC  | gi 59803113 sp Q9HCF6 NA                   |
| 3431 | CRKNGLYTRSPPR  | gi 90183175 sp Q58EX2  NA                  |

|      |                |                                           |
|------|----------------|-------------------------------------------|
| 3432 | LHSHPAYVAHCVL  | gj 115502131 sp Q8WW NA                   |
| 3433 | NNFYEYYVDDPPR  | gj 2506906 sp P30047 G NA                 |
| 3434 | VPSEGAYDIILPR  | gj 46396014 sp Q9NQ84 NA                  |
| 3435 | LACGEKYQVLARR  | gj 119607881 gb EAW87 NA                  |
| 3436 | YLSQEEYEAWSQR  | gj 20137932 sp Q9BXL6  NA                 |
| 3437 | CEDCSQYHDSECP  | gj 118572696 sp P57071 NA                 |
| 3438 | VGFEFSYGQEPTL  | gj 46397079 sp P60852 z NA                |
| 3439 | HDCCLKYINLKAS  | gj 17380310 sp Q12874 c NA                |
| 3440 | LLLELDYADFGCP  | gj 74748436 sp Q6EMK4 NA                  |
| 3441 | VPVEFHYNMHAS   | gj 20455187 sp Q9H4D5 NA                  |
| 3442 | CTEGTTYVCSVCP  | gj 17380345 sp Q9HC78 NA                  |
| 3443 | QLFNVLYEKKGES  | gj 13632817 sp Q9UQ80 NA                  |
| 3444 | WKR SIGYDDTDES | gj 21264409 sp Q99541 , NA                |
| 3445 | CWKNPLYPFPGFS  | gj 143811435 sp Q1337C NA                 |
| 3446 | FWEQSDYVPVEFS  | gj 71151936 sp Q9BYG8 NA                  |
| 3447 | PLRVDKYEIPQES  | gj 113430861 ref XP_94f NA                |
| 3448 | ANDSLAYSDSAGS  | gj 114150022 sp Q7Z3D, NA                 |
| 3449 | WKDAPYYINLVEM  | gj 17366834 sp Q9H251  NA                 |
| 3450 | SNRETIYPNASLL  | gj 6166048 sp P31997 C  NA                |
| 3451 | IYTLIHYNQRPS   | gj 13878337 sp Q13315 , NA                |
| 3452 | KIGEGTYGVVYKA  | gj 119609759 gb EAW89 [KIGEGTYGVVYKA Y 15 |
| 3453 | NAYRQLYLNPCKGD | gj 30172802 sp Q15021 c NA                |
| 3454 | KLNTEEYLRVIGK  | gj 1723117 sp P50748 KI NA                |
| 3455 | GSDANTYANLCQL  | gj 18202620 sp Q92743 I NA                |
| 3456 | KYIKDKYPNLQVI  | gj 124419 sp P12268 IMI NA                |
| 3457 | NPPPEAYGPPRAL  | gj 13629029 sp Q08397 I NA                |
| 3458 | DPLTETYGIPFYL  | gj 47606438 sp P61599 t NA                |
| 3459 | LTPSFEYQDPWN   | gj 1709333 sp P29475 N, NA                |
| 3460 | STSLVGYL RVQGV | gj 48429265 sp Q9UKG9 NA                  |
| 3461 | YVGTNAYMAPERI  | gj 118572669 sp Q13163 NA                 |
| 3462 | EISEDVYTAVEHS  | gj 25453223 sp Q9ULU4 NA                  |
| 3463 | EDNQETYLNISQV  | gj 14423909 sp O94768 c NA                |
| 3464 | EAGTQRYMAPELL  | gj 9087133 sp Q16671 A NA                 |
| 3465 | QVGTRRYMAPEVL  | gj 97535735 sp Q13705 , NA                |
| 3466 | LCFLVFYIPLSI   | gj 416726 sp P32247 BR NA                 |
| 3467 | DGHEIYVDPMQL   | gj 129892 sp P16234 PG [DGHEIYVDPMQL Y 5f |
| 3468 | QADTTQYVPMLER  | gj 129892 sp P16234 PG [QADTTQYVPMLER Y 7 |
| 3469 | DYPLAFYINPWSK  | gj 33112422 sp Q16827 I NA                |
| 3470 | DGESSNYINAALM  | gj 117949771 sp O14522 NA                 |
| 3471 | VCMLFEYINQGDL  | gj 118572711 sp Q01973 NA                 |
| 3472 | RQEEPEYENVVPI  | gj 20140022 sp Q14162 c NA                |
| 3473 | FVCSGAYVITRGS  | gj 119630463 gb EAX10c NA                 |
| 3474 | LLCKISYVDTYPC  | gj 74733473 sp Q9BYG0 NA                  |
| 3475 | HTEDDIYKLSLVL  | gj 34395670 sp Q8IV61 c NA                |
| 3476 | CLPGTDYVLKDHS  | gj 37089988 sp Q9UI38 n NA                |
| 3477 | PEHEGCYLSVGHS  | gj 22001808 sp Q9Y5X9  NA                 |
| 3478 | VVTREDEENGHS   | gj 27923737 sp Q9GZN1 NA                  |
| 3479 | HNVKPEYLDAYNS  | gj 17380144 sp Q9BPWf NA                  |
| 3480 | RYREHVHYLLDPS  | gj 118573083 sp Q3KNT NA                  |
| 3481 | FYADPNYASEKPS  | gj 74760694 sp Q96A28  NA                 |
| 3482 | GKMKNTSYVLKHPS | gj 74751215 sp Q8ND82 NA                  |
| 3483 | QTIDDYYTDASPS  | gj 134035377 sp Q8WUf NA                  |

|                     |                                              |
|---------------------|----------------------------------------------|
| 3484 DIEEPIYTMQKQS  | gj 145503430 ref XP_001NA                    |
| 3485 QEESTKYFNFATS  | gj 12643717 sp Q13349 I NA                   |
| 3486 FHYESYQIGNTS   | gj 23821932 sp Q8TDX9 NA                     |
| 3487 LVLKGSYEDTQTS  | gj 74750540 sp Q86XP0  NA                    |
| 3488 LNAELSYFITGAA  | gj 123123257 emb CAI1: NA                    |
| 3489 GFFKDGVMVNVVS  | gj 68565572 sp Q5VW38 NA                     |
| 3490 VTVNTAYGSNGVS  | gj 62089210 dbj BAD930 NA                    |
| 3491 ISESDKYDLKTET  | gj 20139281 sp Q9UBK8 NA                     |
| 3492 TTSDGGYSFKYET  | gj 124274 sp P05111 IN: NA                   |
| 3493 DDCKAAYIDILGT  | gj 108935991 sp Q6UXV NA                     |
| 3494 LLHDEPYTDFDGT  | gj 20139243 sp Q9P1W9 NA                     |
| 3495 YIECTAYPDKNFT  | gj 74759634 sp Q8IWG1 NA                     |
| 3496 DPSSLHYINPMGT  | gj 33860150 sp Q96FN4  NA                    |
| 3497 STDNDDYDDISAA  | gj 13637684 sp P30203 C [STDNDDYDDISAA Y 66  |
| 3498 YNSVVLYSTPPI   | gj 143811474 sp P17948 [YNSVVLYSTPPI Y 1333  |
| 3499 DDDANSYENVLIC  | gj 74752543 sp Q9GZY6 [DDDANSYENVLIC Y 13    |
| 3500 DVEDPVYQYIVFE  | gj 150421536 sp O75553 [DVEDPVYQYIVFE Y 19   |
| 3501 ENADDSYEPPEVE  | gj 82592659 sp Q8WV28 [ENADDSYEPPEVE Y 9     |
| 3502 GTPEGLYL       | gj 49065817 sp P62191 F [GTPEGLYL Y 439 P621 |
| 3503 TVEAVAYAPKKEL  | gj 548663 sp Q06609 RA [TVEAVAYAPKKEL Y 54   |
| 3504 EESRLLYEIQNRD  | gj 118572680 sp Q01804 NA                    |
| 3505 PEPAHAYAQPQTT  | gj 1169094 sp P46109 C [PEPAHAYAQPQTT Y 2    |
| 3506 REFLDQYDAPL    | gj 20178094 sp O14543 : [REFLDQYDAPL Y 221 C |
| 3507 PKAEDEYVNEPLY  | gj 3913590 sp Q15303 E NA                    |
| 3508 EGWMVHYTSKDTL  | gj 2499575 sp Q15139 K [EGWMVHYTSKDTL Y 4    |
| 3509 LDNGGFYISPRIT  | gj 125474 sp P06239 LC [LDNGGFYISPRIT Y 192  |
| 3510 QSSGYRYGTDPTP  | gj 125370 sp P06241 FY [QSSGYRYGTDPTP Y 3    |
| 3511 SLFTPDYELLTEN  | gj 12643404 sp O60674 : [SLFTPDYELLTEN Y 81: |
| 3512 VKCVAPYPSLLSS  | gj 125484 sp P08581 ME [VKCVAPYPSLLSS Y 13   |
| 3513 GLGVKYYIDPSTY  | gj 6919882 sp O15197 E NA                    |
| 3514 LNSDVQYTEVQVS  | gj 129747 sp P16284 PE [LNSDVQYTEVQVS Y 6:   |
| 3515 ETTVELYSLAERC  | gj 20141582 sp Q04759 I [ETTVELYSLAERC Y 90  |
| 3516 GFNPLIYCRSPDF  | gj 114765 sp P07550 AD [GFNPLIYCRSPDF Y 32   |
| 3517 KAQQGLYQVPGPS  | gj 8134339 sp P56945 B: [KAQQGLYQVPGPS Y 1   |
| 3518 KSATLLYDQPLQV  | gj 116242614 sp Q96RT: [KSATLLYDQPLQV Y 92   |
| 3519 LSPSSGYMPMNQG  | gj 119534 sp P21860 ER NA                    |
| 3520 RIGDELYLEPLED  | gj 74717382 sp Q99638 I [RIGDELYLEPLED Y 28  |
| 3521 RREVG DYGQLHET | gj 12643404 sp O60674 : [RREVG DYGQLHET Y 5  |
| 3522 TRRTPDYFL      | gj 50402236 sp P62714 F [TRRTPDYFL Y 307 P67 |
| 3523 YGVSPNYDKWEME  | gj 85681908 sp P00519 : [YGVSPNYDKWEME Y :   |
| 3524 ETADGGYMTLNPR  | gj 399478 sp P31995 FC [ETADGGYMTLNPR Y 2    |
| 3525 LLRRGEYPDYQQW  | gj 117464 sp P07315 CR [LLRRGEYPDYQQW Y 6    |
| 3526 PTDNEDYEHDDED  | gj 3023207 sp P78314 3E [PTDNEDYEHDDED Y 1   |
| 3527 GST            | contol_spot [IMRDSNYISKGST Y 85:             |
| 3528 pY             | contol_spot NA                               |
| 3529 pY             | contol_spot NA                               |
| 3530 GST            | contol_spot [IMRDSNYISKGST Y 85:             |
| 3531 pY             | contol_spot NA                               |
| 3532 pY             | contol_spot NA                               |
| 3533 PNSNSMYIDRPPS  | gj 10720065 sp Q13094 I [PNSNSMYIDRPPS Y 17  |
| 3534 DLDEDEY EEDTPK | gj 2842711 sp Q92785 R NA                    |
| 3535 LSENVYPYKFKVQA | gj 13638154 sp P16144 I NA                   |



|      |                |                            |
|------|----------------|----------------------------|
| 3536 | GGGYAPYGRPGRG  | gi 20454955 sp Q14526 I NA |
| 3537 | MEKGEPYMSIQPA  | gi 61247587 sp Q969G3  NA  |
| 3538 | FWVGQPYPTLSTP  | gi 1705545 sp P55285 C, NA |
| 3539 | YLHRKEYSQNLTS  | gi 108864727 sp Q8TE6  NA  |
| 3540 | QVLQLVYKDGSPC  | gi 60416403 sp P11717 I NA |
| 3541 | DYKNICYVITHGD  | gi 74760696 sp Q96A32  NA  |
| 3542 | GAGQLDYGSKGIP  | gi 131573277 gb ABO33  NA  |
| 3543 | TASLAKYADPVAD  | gi 51704233 sp O15194  NA  |
| 3544 | DEVETTYSRFQDL  | gi 1177024 sp P42694 H  NA |
| 3545 | QGGYDRYSGGNYR  | gi 1710620 sp P98179 R  NA |
| 3546 | HTVQLKYYNKPLL  | gi 22095550 sp Q9HCU4  NA  |
| 3547 | ANSSMAYPSLVAM  | gi 14285501 sp P78318 I NA |
| 3548 | AGCGKFYEGTADE  | gi 2494849 sp Q16775 G NA  |
| 3549 | PVDILTYVAWKIS  | gi 126047 sp P00338 LD  NA |
| 3550 | PKVLQDYRKLKNT  | gi 60392197 sp P09884 I NA |
| 3551 | RQHHDEYEDEIRM  | gi 115502368 sp O75976  NA |
| 3552 | YNVTSDYAVHPMS  | gi 48474955 sp Q9HAU0  NA  |
| 3553 | FRNGIPYLNQEEE  | gi 60390262 sp O95453 I NA |
| 3554 | KVVQDQTYQIMKVE | gi 71152119 sp O14964 I NA |
| 3555 | EYVRTLYDFPGND  | gi 1169094 sp P46109 C  NA |
| 3556 | YCPDSLQVMQQC   | gi 585912 sp Q04912 RC NA  |
| 3557 | GRGHTRYYPQYRD  | gi 119611307 gb EAW90  NA  |
| 3558 | QNQDDGYLALSSR  | gi 119372014 sp Q8IVL1  NA |
| 3559 | YHPMSEYPTYHTH  | gi 547937 sp P15941 MU NA  |
| 3560 | VSRALEYNSKRTP  | gi 66268793 gb AA4312  NA  |
| 3561 | NGLLSYYRSKAEM  | gi 129308 sp P22059 OS NA  |
| 3562 | VARGMEYLAEQKF  | gi 585912 sp Q04912 RC NA  |
| 3563 | FTVLEHYRRTHCV  | gi 116242668 sp Q14896  NA |
| 3564 | KITRLTYEIEDEK  | gi 115502381 sp P15924  NA |
| 3565 | TLKDFQYVDRDGK  | gi 41017059 sp Q9Y6I3 E NA |
| 3566 | GMLGASYAAVPLY  | gi 60416378 sp Q9Y6N1  NA  |
| 3567 | GYSDEIYVVPDDS  | gi 46397678 sp Q13017 I NA |
| 3568 | SGADRIYDLNIPA  | gi 20532395 sp O43639 I NA |
| 3569 | LSHTDFYEEIQEF  | gi 51704228 sp P55786 F NA |
| 3570 | NLKKKSYLNIRTH  | gi 21759409 sp Q96B26  NA  |
| 3571 | YGPPTSYPNLKIP  | gi 2498883 sp Q13435 S NA  |
| 3572 | VISTLQYLNILNY  | gi 30923328 sp Q92993  NA  |
| 3573 | LKLAEPYGKIKNY  | gi 12643409 sp P43243 I NA |
| 3574 | NALAKWYVNAKGY  | gi 2499703 sp Q13393 P NA  |
| 3575 | NLKDINYVNPVIK  | gi 116607 sp P01031 CO NA  |
| 3576 | VFYVETYGVIEKL  | gi 14548113 sp O15232 I NA |
| 3577 | ELLTEAYGEVHIK  | gi 6226953 sp O96018 A NA  |
| 3578 | EWSKDQYVNPNSQ  | gi 116241267 sp Q9Y6D  NA  |
| 3579 | QQSCGTYLRVRQP  | gi 547896 sp P11912 CD NA  |
| 3580 | TDADYEYEEITLE  | gi 2497504 sp Q12959 D NA  |
| 3581 | LASEEIYINQLEA  | gi 5915668 sp Q12979 A NA  |
| 3582 | PFCLPFYLIPPSA  | gi 20137254 sp O14503 I NA |
| 3583 | LDVGAMYPNIIIT  | gi 116241339 sp Q07864  NA |
| 3584 | SPTGGIYPNPVNP  | gi 399496 sp Q01543 FL  NA |
| 3585 | MSSSYVNALFS    | gi 3915721 sp P31268 H  NA |
| 3586 | SSSLDSYAVNQA   | gi 6136122 sp O75840 K  NA |
| 3587 | LLYDLRYLNIVLT  | gi 22653695 sp Q8WTW  NA   |

|                     |                            |
|---------------------|----------------------------|
| 3588 DTIFRGYLIPKGT  | gi 117250 sp P05181 CP NA  |
| 3589 INFRTTYVNANEE  | gi 7531135 sp Q12809 K NA  |
| 3590 VILGLSYANLQTG  | gi 6093462 sp O75694 N NA  |
| 3591 LCQSGIYINVLDI  | gi 3024212 sp O00476 N NA  |
| 3592 VTDQESYANVKQW  | gi 23396834 sp Q9H0U4 NA   |
| 3593 GAYLLPYLILLMV  | gi 18202939 sp Q9H2J7  NA  |
| 3594 ASLLARYPPEKLF  | gi 56404535 sp Q6XZF7  NA  |
| 3595 RTILSRYEGKMET  | gi 115855 sp P22681 CB NA  |
| 3596 WDTTGLYSFSEQT  | gi 13633914 sp Q15796  NA  |
| 3597 HLQDVPYVMVRER  | gi 148876773 sp Q14126 NA  |
| 3598 LLGLPSYMLQSEE  | gi 56404535 sp Q6XZF7  NA  |
| 3599 H3:17          | contol_spot NA             |
| 3600 H7:17          | contol_spot NA             |
| 3601 QVDKSDYDMVDYL  | gi 20981701 sp Q14974 I NA |
| 3602 TQVVDHYENPRNV  | gi 24307953 ref NP_055 NA  |
| 3603 FGTKTRYEDVNPV  | gi 68565617 sp Q9UNW NA    |
| 3604 LTRQEKYTSEKPV  | gi 119585370 gb EAW64 NA   |
| 3605 YTWEYEYEEIGPV  | gi 68565259 sp Q96G30  NA  |
| 3606 DFVKEKYLEYQQV  | gi 123271938 emb CAMz NA   |
| 3607 SGSAHEYSSSPDD  | gi 115892 sp P16870 CB NA  |
| 3608 AFMEPRYHVRGED  | gi 55976445 sp Q6S8J3  NA  |
| 3609 IRDFQEYVEPGED  | gi 134047749 sp Q9Y6G NA   |
| 3610 LVEKGEYCQTRYV  | gi 90110053 sp Q06587 I NA |
| 3611 AFSCPAYWMPGEW  | gi 76800647 sp Q8TE60  NA  |
| 3612 SADCLDYKEPGAA  | gi 417425 sp P32242 OT NA  |
| 3613 NDHFDTYADALWW  | gi 14285389 sp O43526 I NA |
| 3614 TLNLSKYQNVNTW  | gi 74761446 sp Q9H5K3  NA  |
| 3615 EVLSDIYIIPAY   | gi 74751163 sp Q8NB91  NA  |
| 3616 GCKHNSYEDAKAY  | gi 73920089 sp Q5JUK3  NA  |
| 3617 MTSQGYKRTPAY   | gi 119605027 gb EAW84 NA   |
| 3618 WNPKNKEYEDLLDY | gi 62899863 sp Q76N32  NA  |
| 3619 DKSDTAYQWNLKY  | gi 129122 sp P23515 OV NA  |
| 3620 VIVMSKYMENGMQ  | gi 12585199 sp O00257  NA  |
| 3621 QENDPAYILNDLY  | gi 119585925 gb EAW65 NA   |
| 3622 SWYNHFYVSVCLY  | gi 117949602 sp Q7Z2K NA   |
| 3623 CPASDGYKQIMPY  | gi 67462180 sp Q8N6G6 NA   |
| 3624 NISDLKYCELPPY  | gi 115502208 sp Q8N9F NA   |
| 3625 TLRCNEYENCLCQ  | gi 401413 sp P04275 VW NA  |
| 3626 GLCGEDYVFFHLD  | gi 113912 sp P16066 AN NA  |
| 3627 GPAQDIYQVPPSA  | gi 8134339 sp P56945 B NA  |
| 3628 AKSKFEYVRDFEA  | gi 146325755 sp Q9NW NA    |
| 3629 LFTDDKYNDFIEA  | gi 134035014 sp Q9P227 NA  |
| 3630 LGDKETYHFDPEA  | gi 3123244 sp P49641 M NA  |
| 3631 DNSTEGYWKYGYD  | gi 2497915 sp Q30201 H NA  |
| 3632 GRRRDSYYDRGYD  | gi 4033480 sp Q13595 T NA  |
| 3633 QKYKSLYGDVDSP  | gi 134048492 sp Q9Y4B NA   |
| 3634 FFYDGGYINASAE  | gi 1709662 sp P55058 PI NA |
| 3635 WAENQTYMDCRAE  | gi 126302546 sp Q5JY77 NA  |
| 3636 ESEYEEYTDSEDE  | gi 1709012 sp P55081 M NA  |
| 3637 VEFMFSYGNFGYG  | gi 74726955 sp Q53TS8  NA  |
| 3638 GIPPLYTETGLE   | gi 68565213 sp Q8N6L7  NA  |
| 3639 DDHDEKYGVPSLE  | gi 74735764 sp Q16526  NA  |

|                     |                                              |
|---------------------|----------------------------------------------|
| 3640 CRECNSYVYFQGA  | gi 119589959 gb EAW69 NA                     |
| 3641 RDEKGRYKRFHGA  | gi 74732921 sp Q9BRR8 NA                     |
| 3642 CPSEFDYNATDHA  | gi 30923161 sp O75487  NA                    |
| 3643 <<Marker>>     | contol_spot NA                               |
| 3644 TDKSDKYDARDVE  | gi 67461057 sp Q8NHP6 NA                     |
| 3645 FTSSSYFDEPVE   | gi 21263420 sp Q9NP61  NA                    |
| 3646 NPYKEVYTDMWVE  | gi 20532391 sp Q9Y6K1  NA                    |
| 3647 AAAAETYANISWE  | gi 33112413 sp Q92823  NA                    |
| 3648 GTADDRYLPHAF   | gi 9087155 sp Q12968  NA                     |
| 3649 NRGKEGYIERKAF  | gi 74734998 sp Q9UEE9 NA                     |
| 3650 VWEEQAYSNCSSGP | gi 113015 sp P28330 AC NA                    |
| 3651 GPAFESYESMELA  | gi 28380093 sp Q9Y2U9  NA                    |
| 3652 IETDSGYNSMDLA  | gi 27734215 sp Q9H9E1  NA                    |
| 3653 SWNCDGYVVMRKA  | gi 119593844 gb EAW73 NA                     |
| 3654 DTWRTEYVPVPIP  | gi 17369677 sp Q9UBW7 NA                     |
| 3655 EKGKTKYVIFKIP  | gi 41688803 sp Q9HAY6 NA                     |
| 3656 HWQDSGYLIVYVT  | gi 118595707 sp O00562 NA                    |
| 3657 VLPCLEYHNNTWT  | gi 114149325 sp Q14667 NA                    |
| 3658 DTSALSYSVSKYT  | gi 17433093 sp Q9UQF2 NA                     |
| 3659 FSSNDPYPYPRYT  | gi 13124785 sp P16519  NA                    |
| 3660 NSRCEYYCSPGYT  | gi 2498958 sp P78539 SI NA                   |
| 3661 RCGEGFYSDHGVC  | gi 51315966 sp Q86XX4  NA                    |
| 3662 ELQEGRYESEKLQ  | gi 119586105 gb EAW65 NA                     |
| 3663 KARSPTYINMREV  | gi 1345664 sp P20807 C NA                    |
| 3664 <<Marker>>     | contol_spot NA                               |
| 3665 FIRVGYYVNEYL   | gi 74734533 sp Q9NVP2 NA                     |
| 3666 VITDVYYVDGTEV  | gi 8928568 sp Q12888 TI NA                   |
| 3667 DNAENVYVWKQGV  | gi 121531 sp P07359 GP NA                    |
| 3668 IVSGTRYKGNNGV  | gi 20137697 sp O60762 I NA                   |
| 3669 IQLLDDYPKCFIV  | gi 133041 sp P05388 RL [IQLLDDYPKCFIV Y 24 F |
| 3670 LKGSNLYSQLERQ  | gi 59798964 sp Q8N5T2 [LKGSNLYSQLERQ Y 2     |
| 3671 TDFPGNYSYDDA   | gi 3914807 sp O15160 R [TDFPGNYSYDDA Y 3     |
| 3672 DDDFEPYLSPQAR  | gi 41019527 sp Q9Y5A9 [DDDFEPYLSPQAR Y 3     |
| 3673 DVKEQIYKLAKKG  | gi 50403608 sp P62277 F NA                   |
| 3674 NGAEPNYHSLPSA  | gi 125863645 sp Q6IAA8[NGAEPNYHSLPSA Y 4     |
| 3675 IGNKERYDFHKL   | gi 55957529 emb CAI172 NA                    |
| 3676 MAFSPNYMSMLLF  | gi 119567991 gb EAW47 NA                     |
| 3677 YQYMETYMGPALF  | gi 20981701 sp Q14974 I NA                   |
| 3678 FFSEKIYKLNEDM  | gi 130861 sp P25789 PS NA                    |
| 3679 GHKNEKYCIFANF  | gi 74762455 sp Q86VZ2  NA                    |
| 3680 KNSEGKYHCPVLF  | gi 23813917 sp Q13356 I NA                   |
| 3681 PVWEFKYGDLLGH  | gi 5921793 sp O75503 C NA                    |
| 3682 YLTMDIYAFPAGH  | gi 74751178 sp Q8NBV4 NA                     |
| 3683 IRAPPTYVKVEVP  | gi 24212387 sp Q9UJQ4 NA                     |
| 3684 HIEVKGYEDGGIH  | gi 59799178 sp O00478 I NA                   |
| 3685 <<Marker>>     | contol_spot NA                               |
| 3686 CVKNSSYVHSSLH  | gi 265484 gb AAB25346 NA                     |
| 3687 LKQADLYISEGLH  | gi 22654293 sp Q92526  NA                    |
| 3688 EQPETYKWDNWP   | gi 97052424 sp Q8N201  NA                    |
| 3689 PEVSEKYEIGSVP  | gi 37087933 sp O76003  NA                    |
| 3690 DEGESRYKITDII  | gi 118601083 sp Q13085 NA                    |
| 3691 LLCCGEYQDVLII  | gi 109896166 sp Q3MJ1 NA                     |

|                     |                                              |
|---------------------|----------------------------------------------|
| 3692 CDINGKYENNYNA  | gi 90101756 sp Q8IYR2 f NA                   |
| 3693 VYSKLIYVCSFPA  | gi 11387048 sp O14901 i NA                   |
| 3694 SDPAEEYELVQVI  | gi 14548230 sp Q9NZL6  NA                    |
| 3695 FNVEEMYEAHAWI  | gi 48474734 sp Q8IXQ6 i NA                   |
| 3696 HYRESRYRRSPYI  | gi 89024885 ref XP_935z NA                   |
| 3697 MASLEVYVRRGYI  | gi 134047740 sp O00763 NA                    |
| 3698 AEYCEQYVSYFCK  | gi 17433089 sp Q9UHC6 NA                     |
| 3699 KTDTLDYEFACK   | gi 74760739 sp Q96BP3  NA                    |
| 3700 KFIEQSYSSVAEM  | gi 23830899 sp Q13733  NA                    |
| 3701 QMYNSPYHRVTDC  | gi 74751734 sp Q96A46  NA                    |
| 3702 SPCSRGYCDHGGQ  | gi 125987841 sp Q99102 NA                    |
| 3703 PPDNSFYVRTCNK  | gi 74751754 sp Q96B02  NA                    |
| 3704 AEMEGKYVINMPK  | gi 74729722 sp Q8N9M1 NA                     |
| 3705 VRRNNIYELNPNK  | gi 97535778 sp Q9NSI6 i NA                   |
| 3706 <<Marker>>     | contol_spot NA                               |
| 3707 EVSMSRYIPHPFL  | gi 66347356 emb CAI95c NA                    |
| 3708 VEASNPYVEPRFL  | gi 1705545 sp P55285 C NA                    |
| 3709 AAYNPSYYSGPGL  | gi 34364899 emb CAE45 NA                     |
| 3710 DMYNTPYTYNAGL  | gi 119625041 gb EAX04f NA                    |
| 3711 GQQEEYYRKLGL   | gi 125993 sp P04180 LC NA                    |
| 3712 SGSEVWYSNGPGL  | gi 94717653 sp Q38SD2  NA                    |
| 3713 ACMWGEYVDNTNL  | gi 123079 sp P06865 HE NA                    |
| 3714 YPDKIDYASLDPL  | gi 146286137 sp Q8N3D NA                     |
| 3715 CYSDBGKYEPKQL  | gi 48428570 sp O75443  NA                    |
| 3716 EQPAPGYDTHGRL  | gi 85700443 sp Q07157  NA                    |
| 3717 PARKGLYEGTGRL  | gi 17375667 sp Q9UBC3 NA                     |
| 3718 KGNEEGYFGTRRL  | gi 1169653 sp P98095 F NA                    |
| 3719 CVSWSLYHDLGPM  | gi 119613484 gb EAW93 NA                     |
| 3720 AELVNNYKKGWSL  | gi 145559521 sp Q13702 NA                    |
| 3721 NQGVRTYVDPFTY  | gi 1711371 sp P54764 E  [NQGVRTYVDPFTY Y 5   |
| 3722 PAAPVSYADMRTG  | gi 547738 sp P35568 IRs NA                   |
| 3723 PEDKAKYDAIFDS  | gi 67476728 sp P42566 E NA                   |
| 3724 PKSPGEYINIDFG  | gi 62298062 sp Q9Y4H2  NA                    |
| 3725 VYEEDSYVKRSQG  | gi 547807 sp P07949 RE [VYEEDSYVKRSQG Y 9    |
| 3726 YAEPHTYEPPGRA  | gi 19857975 sp P29322 E [YAEPHTYEPPGRA Y 6   |
| 3727 <<Marker>>     | contol_spot NA                               |
| 3728 YIDPETYEDPNRA  | gi 146345416 sp Q15375 NA                    |
| 3729 YMEDSTYYKASKG  | gi 3183518 sp Q05397 F [YMEDSTYYKASKG Y 6    |
| 3730 YVDPHTYEDPTQA  | gi 116241351 sp P29320 [YVDPHTYEDPTQA Y 6    |
| 3731 DIYKNDYYRKRGE  | gi 126302596 sp P08922 [DIYKNDYYRKRGE Y 21   |
| 3732 ILEEVRYIANRFR  | gi 91208254 sp Q494W8 [ILEEVRYIANRFR Y 442   |
| 3733 ISKAEYFLLKSR   | gi 543759 sp Q07001 AC NA                    |
| 3734 IYKNDYYRKRGE   | gi 126302596 sp P08922 [IYKNDYYRKRGE Y 21    |
| 3735 IYSGDYRQGCAS   | gi 1717829 sp Q06418 T NA                    |
| 3736 KDTETVYSEVRKA  | gi 129747 sp P16284 PE [KDTETVYSEVRKA Y 71   |
| 3737 KKVVALYDYMPMN  | gi 547759 sp Q06187 BT [KKVVALYDYMPMN Y 2    |
| 3738 VIEDNEYTAREGA  | gi 20141296 sp P08631 f [VIEDNEYTAREGA Y 39  |
| 3739 HAEAAALYKNLLHS | gi 125472 sp P10721 KIT [HAEAAALYKNLLHS Y 70 |
| 3740 LDGENIYIRHSNL  | gi 90101808 sp P11171 z [LDGENIYIRHSNL Y 66C |
| 3741 SQQTNDYMQPEED  | gi 46397817 sp P12814 z [SQQTNDYMQPEED Y 1   |
| 3742 PEPENDYEDVEEM  | gi 123557 sp P14317 HC [PEPENDYEDVEEM Y 3    |
| 3743 RDINSLYDVSRMY  | gi 143811440 sp P16885 [RDINSLYDVSRMY Y 75   |

|                     |                                            |
|---------------------|--------------------------------------------|
| 3744 AEQAERYDDMATC  | gj 112690 sp P27348 143 NA                 |
| 3745 PDAVDKYLET PGD | gj 112927 sp P05067 A4 NA                  |
| 3746 ECCKEPYPDVTFT  | gj 91208254 sp Q494W8 NA                   |
| 3747 INTEGGYVCRSE   | gj 119226 sp P01133 EG NA                  |
| 3748 <<Marker>>     | control_spot NA                            |
| 3749 SGSDDTYFSVNV   | gj 120046 sp P11362 FG NA                  |
| 3750 NCTNELYMMMRDC  | gj 119583708 gb EAW63 NCTNELYMMMRDC Y 1    |
| 3751 SSDNSLYTNAKGS  | gj 47117704 sp P61244 I SSDNSLYTNAKGS Y 1  |
| 3752 QRLGLDYEERVLP  | gj 74752151 sp Q99623 I NA                 |
| 3753 VTCTRIYEKVE    | gj 232081 sp Q01469 FA NA                  |
| 3754 RPTQPVYQIQNRG  | gj 74733529 sp Q9H0W8 RPTQPVYQIQNRG Y 1    |
| 3755 LRIVEPYIAWGYP  | gj 133021 sp P18124 RL LRIVEPYIAWGYP Y 13  |
| 3756 KKNLQYYDISAKS  | gj 51338598 sp P62826 F KKNLQYYDISAKS Y 14 |
| 3757 KRVPYCAVDKALA  | gj 1169094 sp P46109 CI KRVPYCAVDKALA Y 2  |
| 3758 NKEVLDYSTPTTN  | gj 20455516 sp P08240 S NKEVLDYSTPTTN Y 2  |
| 3759 GQRIYQYIQRFY   | gj 3219996 sp Q13627 D GQRIYQYIQRFY Y 27   |
| 3760 SCRNLVYDQSPNR  | gj 108860813 sp Q9NXR SCRNLVYDQSPNR Y 2    |
| 3761 RLFQQIYSDGSDE  | gj 62512186 sp Q9Y2Z0 RLFQQIYSDGSDE Y 31   |
| 3762 ETSKLIYDFIEDQ  | gj 1722836 sp P42768 W ETSKLIYDFIEDQ Y 291 |
| 3763 TATEGQYQPPQ    | gj 125474 sp P06239 LCI TATEGQYQPPQ Y 505  |
| 3764 WQKNGDYLCVKVD  | gj 3123230 sp P55884 IF NA                 |
| 3765 TQAVAAAYQGCHFM | gj 14349166 dbj BAB607 NA                  |
| 3766 KHFTNPYCNILN   | gj 121743 sp P20936 RA KHFTNPYCNILN Y 61   |
| 3767 LPDGT FYSTLYLP | gj 24418367 sp Q9UPY3 LPDGT FYSTLYLP Y 65  |
| 3768 PGSAAPYLKTKFI  | gj 48429227 sp P40763 S PGSAAPYLKTKFI Y 70 |
| 3769 <<Marker>>     | control_spot NA                            |
| 3770 NLANNPYSGDVTK  | gj 7688705 gb AAF67493 NLANNPYSGDVTK Y 8   |
| 3771 VKLISWYDNEFGY  | gj 120649 sp P04406 G3 NA                  |
| 3772 KLAAVTYNGVDNN  | gj 67472677 sp Q16181 S KLAAVTYNGVDNN Y 3  |
| 3773 RLGEDPYTENG    | gj 3183511 sp P28906 CI RLGEDPYTENG Y 3    |
| 3774 EVKRNVDLTSIP   | gj 20454906 sp Q9UNN5 NA                   |
| 3775 LTADFLYEEVHPK  | gj 41688753 sp Q12792 LTADFLYEEVHPK Y 32   |
| 3776 PPLEESYINNDQY  | gj 731631 sp P38704 ST NA                  |
| 3777 MSKMESYATKVEL  | gj 730744 sp P38889 SK NA                  |
| 3778 IALET FYARVGRP | gj 729290 sp P21657 DA NA                  |
| 3779 NSYECKYDRPPRN  | gj 731945 sp P39529 YJ NA                  |
| 3780 NPSLTKYNDTATY  | gj 1352985 sp P47043 Z NA                  |
| 3781 RKEGIEYEDMHTH  | gj 88984071 sp P17106 C NA                 |
| 3782 IQTCEKYIQVLEE  | gj 1169823 sp P04386 G NA                  |
| 3783 KIFSDYYTLVNSI  | gj 1169136 sp P41817 CI NA                 |
| 3784 NSNNSYYSNNEDA  | gj 3024551 sp Q12224 R NA                  |
| 3785 PTADAIYTDVHKL  | gj 729486 sp P39521 FH NA                  |
| 3786 KPENILYADDTPG  | gj 37999483 sp O75676 I NA                 |
| 3787 FNYPDQYVREYAV  | gj 1171955 sp P42338 PI NA                 |
| 3788 CSEGLDYKSMGRM  | gj 119610537 gb EAW90 NA                   |
| 3789 GLREKDYDFPPPM  | gj 8134360 sp Q14511 C NA                  |
| 3790 <<Marker>>     | control_spot NA                            |
| 3791 MDNQGGYGSVGRM  | gj 23503095 sp P31942 I MDNQGGYGSVGRM Y    |
| 3792 SIHNDLYVIGGQM  | gj 148664248 ref NP_99 NA                  |
| 3793 SYFEPYILVVPM   | gj 85397400 gb AAI0489 NA                  |
| 3794 FLTENGYAHNVSM  | gj 74735330 sp O14777 I NA                 |
| 3795 EIKKEDYVLT KFN | gj 134035019 sp Q9P2N NA                   |

|      |               |                                             |
|------|---------------|---------------------------------------------|
| 3796 | GQNEKKYDCVIFN | gj 109458219 ref XP_001NA                   |
| 3797 | KSDGDSYFTIDGN | gj 1705551 sp P55289 C, NA                  |
| 3798 | LNIPDAYADPRFN | gj 7993747 sp Q9Y233 P NA                   |
| 3799 | SSRFGKYIDIYFN | gj 119615728 gb EAW95 NA                    |
| 3800 | CDNCDAYLQMKG  | gj 54039624 sp P63272 NA                    |
| 3801 | NLEQEEYEDPDIP | gj 114787 sp P02730 B3, [NLEQEEYEDPDIP Y 21 |
| 3802 | HKRCPDYIIQKLN | gj 33112650 sp P08575 C NA                  |
| 3803 | NTHKDRYKFIHLN | gj 24212102 sp P59045 NA                    |
| 3804 | RVGELEYAVIDLN | gj 148806872 ref NP_05NA                    |
| 3805 | YCTCISYVNSCLN | gj 543823 sp P35414 AP, NA                  |
| 3806 | DGEVTPYANTNNN | gj 14286105 sp P23634 , [DGEVTPYANTNNN Y 1  |
| 3807 | SVNCELYFMVGVN | gj 147647000 sp Q6UXG NA                    |
| 3808 | YSPPPGYIFDNTN | gj 60223083 ref NP_001C NA                  |
| 3809 | ETNEWRYVSSLPQ | gj 81175180 sp Q9P2G3 NA                    |
| 3810 | GQGPPPYVFMYPQ | gj 61213006 sp Q8WXC NA                     |
| 3811 | NNSMENYLSKMQQ | gj 109940217 sp Q9UPS NA                    |
| 3812 | SDTESGYLQSHPQ | gj 17380345 sp Q9HC78 NA                    |
| 3813 | NRDSYSYGSRRGG | gj 20981728 sp Q13247 , NA                  |
| 3814 | NPTEFDYLNPNVQ | gj 119584881 gb EAW64 NA                    |
| 3815 | YCKEDYRRFSVQ  | gj 8247936 sp P50458 L NA                   |
| 3816 | DADQDIYAVVTYQ | gj 17366834 sp Q9H251  NA                   |
| 3817 | GYASFDYEDAGYQ | gj 74728811 sp Q8N442  NA                   |
| 3818 | LGSKVGYLDEAR  | gj 22028344 gb AAH349, NA                   |
| 3819 | SRFREGYEIPPGG | gj 119606058 gb EAW85 NA                    |
| 3820 | LAFERGYEFLGVA | gj 146286173 sp P0C2W NA                    |
| 3821 | SYGGSDYGNFGG  | gj 8134660 sp Q13151 R NA                   |
| 3822 | CLHKEYYETKKVA | gj 63995543 gb AAY410, NA                   |
| 3823 | ESSKSSYELIVVA | gj 73620979 sp Q8TAB3  NA                   |
| 3824 | VPMPDKYSSEPVA | gj 52788229 sp P00558 F NA                  |
| 3825 | EAEKRPYIDEAKR | gj 6831689 sp O95416 S NA                   |
| 3826 | GHQETKYRSGRIR | gj 62899891 sp Q9HC77  NA                   |
| 3827 | KEDEFGYSWKNIR | gj 68052394 sp O75970 I NA                  |
| 3828 | RKRDRKYDTPGKR | gj 74761976 sp Q9UJL9 , NA                  |
| 3829 | YKIKQGYVIYGIR | gj 114664783 ref XP_001NA                   |
| 3830 | EDEEDFYQGSMEC | gj 50400556 sp Q8N9N2 NA                    |
| 3831 | LKVEPGYPKSALR | gj 60392771 sp P50281 NA                    |
| 3832 | SFESKDYLQVCLR | gj 124015168 sp Q96Q8, NA                   |
| 3833 | YMEEDVYQLQELR | gj 122889217 emb CAI1, NA                   |
| 3834 | PQRKSLYESDRLR | gj 123263697 emb CAM, NA                    |
| 3835 | DQFMNDYVEEANR | gj 74746271 sp Q5TEA3  NA                   |
| 3836 | YEEELLYEIKLNR | gj 20137479 sp Q9H2U9 NA                    |
| 3837 | QLFREPYIRTGYR | gj 51316493 sp Q8TEZ7  NA                   |
| 3838 | RIVDTDYSSFAVL | gj 71296898 gb AAH351, NA                   |
| 3839 | EISFSYYVRPGNG | gj 119609013 gb EAW88 NA                    |
| 3840 | GLQNDYETWLNG  | gj 62988803 gb AAY241, NA                   |
| 3841 | LRHLPDYHDLPNG | gj 88943851 ref XP_372, NA                  |
| 3842 | RVRKDMYNDTLNG | gj 74761039 sp Q96PU8  NA                   |
| 3843 | MNSSGVYASPTCS | gj 55957964 emb CAI14, NA                   |
| 3844 | SSSNLSYQSHDCS | gj 143811459 sp Q96T6, NA                   |
| 3845 | CPEGTVYDDIGDS | gj 2506877 sp Q02817 M NA                   |
| 3846 | GPSNPSYCYGNDS | gj 46397621 sp P98088 NA                    |
| 3847 | LVAEEYYADAFDS | gj 74715639 sp Q8NG66 NA                    |

3848 WTCMEYYERDSDS gj|62287833|sp|O75157| NA  
3849 RRYGDRYINLRGP gj|113045|sp|P12821|AC NA  
3850 EETREAYANIAEL gj|416732|sp|P33076|C2 NA  
3851 EVTFHLYLIPSDC gj|17380146|sp|Q9C000| NA  
3852 ENPIDLYIYVIDM gj|81175161|sp|P55283| NA  
3853 ARTGILYVNASLD gj|22095683|sp|Q9NYQ8 NA  
3854 LEVGAPYLRVDGK gj|24212077|sp|Q08174| NA  
3855 RIYIHRyenVSIL gj|729242|sp|P40145|AD NA  
3856 QRLDCIYLNAGIM gj|8134404|sp|P56937|DI NA  
3857 TFPPISYLN AISW gj|1706681|sp|P53602|EI NA  
3858 EAALNEYL RVKTV gj|59802911|sp|O75891| NA  
3859 GDVAACYANPSLA gj|68056598|sp|Q14376| NA  
3860 ASTSELYGKVQEI gj|9087147|sp|O60547|G NA  
3861 DSTAETYGKIVHY gj|1706450|sp|Q09013|D NA  
3862 VCEEMTYEEIQDN gj|6226609|sp|Q16877|F NA  
3863 AVQKYAYLN VVGM gj|1346355|sp|Q01813|K NA  
3864 EKKDEVYLN L VLD gj|20455502|sp|P49841| NA  
3865 TMKFNGYLRVRIG gj|1346393|sp|P24723|KI NA  
3866 ENIAELYGAVLWG gj|50403742|sp|P41279| NA  
3867 NDINCGYPNAFIC gj|126730|sp|P22897|MR NA  
3868 NSGLHSYMEMPLE gj|125484|sp|P08581|ME NA  
3869 LYMPKVYIIIFHP gj|12644040|sp|O00222| NA  
3870 IFFLLPYINPDLY gj|128359|sp|P25103|NK NA  
3871 CFFLVTYMAPLCL gj|6225810|sp|O43614|O NA  
3872 KDESVDYVPMLDM gj|129890|sp|P09619|PG [KDESVDYVPMLDM|Y|7  
3873 PEVKVQYEEIANC gj|12314174|emb|CAC08 NA  
3874 QGSDLSYVTIFLC gj|14549162|sp|Q12967| NA  
3875 GQRAEPYCSVLPG gj|90101344|sp|Q9BUJ2| NA  
3876 KSSKAYYVLS DAA gj|109826957|sp|Q3B7T NA  
3877 YKRNNFYIKIRPG gj|17433099|sp|Q9Y2J2| NA  
3878 DTEKEKYEITEQC gj|89025433|ref|XP\_940 NA  
3879 NVSSLPYAVPPLS gj|124951|sp|P08514|IT NA  
3880 QPKAPGYICHGLS gj|119581630|gb|EAW61 NA  
3881 LGSGPAYDFPGVL gj|17378648|sp|Q9GZZ0 NA  
3882 GIECPDYRGNRLS gj|74749905|sp|Q7L8L6| NA  
3883 VIFNNTYIYSGMS gj|50400302|sp|Q13564| NA  
3884 ARRDSPYAEINNS gj|119582811|gb|EAW62 NA  
3885 TSFDETYIKKHGP gj|153792764|ref|NP\_06 NA  
3886 NGESPIYMYLQRS gj|119575454|gb|EAW55 NA  
3887 IKAEDHYWGQDSS gj|20178228|sp|Q9H4T2| NA  
3888 SGAGEPYDIIDSS gj|121940655|sp|Q1AE9 NA  
3889 TGGWNDYKNNNSS gj|38258268|sp|Q9UPQ9 NA  
3890 KHPGDFYVQLYSS gj|119569861|gb|EAW49 NA  
3891 EPDADGYESDDCT gj|51701386|sp|Q14184| NA  
3892 IQNQESYEDGPCT gj|20178178|sp|Q9Y2L5| NA  
3893 SLCAGPYQNTADT gj|119606839|gb|EAW86 NA  
3894 VKVEPLYELVTAT gj|20141201|sp|P07358| NA  
3895 HYSEVPYGDPRDT gj|66912176|ref|NP\_001 NA  
3896 EVCEPLYVLALET gj|12644525|sp|P57678| NA  
3897 VQQQEVYGMMPRD gj|94730425|sp|Q13813| [VQQQEVYGMMPRD|Y|  
3898 EKQFQPYFIPIN gj|27735177|sp|P16410| [EKQFQPYFIPIN|Y|218|f  
3899 VIAVDYFAITSP gj|114765|sp|P07550|AD [VIAVDYFAITSP|Y|132

|                     |                                             |
|---------------------|---------------------------------------------|
| 3900 EGMPKSYLPQTVR  | gj 729833 sp P40189 IL6 [EGMPKSYLPQTVR Y 9  |
| 3901 LVDAEEYLVPQQG  | gj 119533 sp P04626 ER NA                   |
| 3902 PSPLQRYSEDPTV  | gj 119533 sp P04626 ER [PSPLQRYSEDPTV Y 11  |
| 3903 ILPRQQYFKQNCS  | gj 729833 sp P40189 IL6 [ILPRQQYFKQNCS Y 81 |
| 3904 PGTPVKYSEVVLD  | gj 74753488 sp Q9Y3P8  [PGTPVKYSEVVLD Y 14  |
| 3905 SINSVPYSRHSYT  | gj 56404432 sp O14639  [SINSVPYSRHSYT Y 46  |
| 3906 SSQEVTYAQLDHW  | gj 74736490 sp Q6GTX8 [SSQEVTYAQLDHW Y 2    |
| 3907 TSDQVLYGQLLGS  | gj 729564 sp Q99062 CS [TSDQVLYGQLLGS Y 7   |
| 3908 EEDADSYENMDNP  | gj 110282942 sp P15391 [EEDADSYENMDNP Y 5   |
| 3909 TATEIYSEVKKQ   | gj 3172147 gb AAC1843  [TATEIYSEVKKQ Y 520  |
| 3910 YDRPASYKKKSML  | gj 129892 sp P16234 PG [YDRPASYKKKSML Y 7   |
| 3911 LAGVSEYELPEDP  | gj 119583714 gb EAW63 [LAGVSEYELPEDP Y 46   |
| 3912 VSTFEQYQFLYDV  | gj 33112650 sp P08575  [VSTFEQYQFLYDV Y 12  |
| 3913 DKKSIYYLGVTSI  | gj 116242617 sp P48357 NA                   |
| 3914 HIGHTGYLNTVTV  | gj 54037168 sp P63244  [HIGHTGYLNTVTV Y 19  |
| 3915 LERGQEYLILEKN  | gj 1174630 sp P42680 TI [LERGQEYLILEKN Y 20 |
| 3916 LSSFTSYENPT    | gj 8928302 sp Q13882 P [LSSFTSYENPT Y 447 C |
| 3917 REDKFMFEFPQP   | gj 42560209 sp P60484 F [REDKFMFEFPQP Y 2   |
| 3918 SADAPAYQQGQNN  | gj 23830999 sp P20963  [SADAPAYQQGQNN Y     |
| 3919 VTPPEGYEVVTVF  | gj 20178312 sp O00151 I [VTPPEGYEVVTVF Y 32 |
| 3920 DIQRSLYDRPASY  | gj 129892 sp P16234 PG [DIQRSLYDRPASY Y 76  |
| 3921 TVVNPKYEGK     | gj 124963 sp P05556 ITE [TVVNPKYEGK Y 795 P |
| 3922 AHHGGLYHTNAEV  | gj 74751027 sp Q8N5H7 [AHHGGLYHTNAEV Y 7    |
| 3923 DTGAGGYSGNSGS  | gj 50897492 sp Q92738 I [DTGAGGYSGNSGS Y 7  |
| 3924 AVGNPEYLNTVQP  | gj 2811086 sp P00533 E NA                   |
| 3925 LGTEDLYDYIDKY  | gj 55977123 sp P68400  [LGTEDLYDYIDKY Y 25  |
| 3926 NGHLDSYEKVTQL  | gj 20178094 sp O14543  [NGHLDSYEKVTQL Y 2   |
| 3927 DYDYESYEKTRT   | gj 1170875 sp P46821 M NA                   |
| 3928 TKKVIQYLAYVAS  | gj 6166599 sp P35579 M NA                   |
| 3929 DEEDYDYESYEKT  | gj 1170875 sp P46821 M NA                   |
| 3930 KLDGKVYAVKVLQ  | gj 17402861 gb AAF270 NA                    |
| 3931 QEAIVITYQPYLIQ | gj 84028176 sp P35670  NA                   |
| 3932 QNRYSFYSTCSGQ  | gj 20138951 sp Q13835 I NA                  |
| 3933 QDLGIQYKALKPE  | gj 461853 sp P35221 CT NA                   |
| 3934 LRISVVYKIWIPE  | gj 5052123 gb AAD3842 NA                    |
| 3935 KLAPAQYIRYTPS  | gj 2500813 sp Q13573 S NA                   |
| 3936 DYPKFKYALLAVM  | gj 17368701 sp Q9BY50  NA                   |
| 3937 SSVSNYIQTTLGR  | gj 14916543 sp O60716  NA                   |
| 3938 EGRVYHYRINTAS  | gj 85681908 sp P00519  NA                   |
| 3939 LAAKLAYLQILSE  | gj 125527 sp P19525 E2 [LAAKLAYLQILSE Y 162 |
| 3940 GADGGLYQIPPQP  | gj 119585319 gb EAW64 NA                    |
| 3941 KVLNELYSVMKTY  | gj 48427907 sp O75044 I NA                  |
| 3942 DNHDGTYTVAYVP  | gj 116241365 sp P21333 NA                   |
| 3943 RSSGGSYRDSYDS  | gj 5921786 sp Q14011 C NA                   |
| 3944 TIAVDRYVVLVHP  | gj 20141395 sp P49683 F NA                  |
| 3945 HEVGWYQAVTAT   | gj 730451 sp P40429 RL NA                   |
| 3946 LQDDDFYAYDEDG  | gj 12643721 sp Q13507  NA                   |
| 3947 ANWRSKYISLSEK  | gj 38258919 sp P42356 F NA                  |
| 3948 WPHSAPYSRFSIS  | gj 145559492 sp Q8IWU NA                    |
| 3949 TVQLKYYNKPLL   | gj 22095550 sp Q9HCU4 NA                    |
| 3950 YFDENPYFENKVL  | gj 46397790 sp Q01105  NA                   |
| 3951 FQMYVTYCKNKPD  | gj 8928460 sp O75962 TI NA                  |



|      |                |                         |                        |
|------|----------------|-------------------------|------------------------|
| 3952 | YIFDSSYGEHPKR  | gi 67461014 sp Q6NYC1   | NA                     |
| 3953 | FYMVSYYERNHRI  | gi 73920974 sp Q9Y4E6   | NA                     |
| 3954 | IFHVNLVGSILFL  | gi 1352692 sp P47900 P  | NA                     |
| 3955 | SQPPEDYSFGAGE  | gi 20178305 sp Q13568 I | NA                     |
| 3956 | FKVKEMYLTKLLS  | gi 74705745 sp O60486 I | NA                     |
| 3957 | AGHGHLYSRIPGL  | gi 67476453 sp P49327 F | NA                     |
| 3958 | LISLDRYLLILSP  | gi 1703010 sp P50406 5  | [LISLDRYLLILSP Y 125 I |
| 3959 | GSGKMQYFQPTIQ  | gi 74714582 sp Q8IZH2   | NA                     |
| 3960 | GSGSYEYPVAEKA  | gi 8928556 sp P36382 C  | NA                     |
| 3961 | PRPPVEYDSDFML  | gi 93141229 sp Q6UB98   | NA                     |
| 3962 | VKTKFGYHIIMVE  | gi 20139299 sp Q9Y237   | NA                     |
| 3963 | GSRRSGYAFSHQE  | gi 30316371 sp P98198 / | NA                     |
| 3964 | TLGENEYFRVFME  | gi 115855 sp P22681 CB  | NA                     |
| 3965 | IKSHLPYRFLPSD  | gi 22096149 sp Q9BR01   | NA                     |
| 3966 | PLSARTYSIDGPN  | gi 116242614 sp Q96RT   | [PLSARTYSIDGPN Y 11    |
| 3967 | KVELFHYQDGAFH  | gi 2501208 sp Q14554 P  | NA                     |
| 3968 | PARLEYENARKF   | gi 4504733 ref NP_0035  | NA                     |
| 3969 | PYSQKRYEEIVKE  | gi 55665593 emb CAH73   | NA                     |
| 3970 | RVGTVGYMAPEVL  | gi 462203 sp P34947 GR  | NA                     |
| 3971 | FCGTIEYMAPEVV  | gi 90110031 sp Q15349 I | NA                     |
| 3972 | FCGTIEYMAPEIL  | gi 12643872 sp Q9UBS0   | NA                     |
| 3973 | TQGVIKYMGPAGA  | gi 1171032 sp P43246 M  | NA                     |
| 3974 | GHNLRTYIIPRSV  | gi 22256943 sp Q9ULW    | NA                     |
| 3975 | DFLLESYLNARS   | gi 145559521 sp Q13702  | NA                     |
| 3976 | SNPLEVYLIPTPP  | gi 2499839 sp Q14669 T  | NA                     |
| 3977 | NLEKECYEEICVY  | gi 131092 sp P22891 PR  | NA                     |
| 3978 | RGTCNYYANAYSF  | gi 125987809 sp P02462  | NA                     |
| 3979 | DDGEITYENVQVP  | gi 116029 sp P21854 CD  | NA                     |
| 3980 | QRVKIAYEEIFVK  | gi 125932 sp P10646 TF  | NA                     |
| 3981 | NWELALYIIISGI  | gi 12230553 sp Q92545   | NA                     |
| 3982 | CADDVAYINVETK  | gi 34582343 sp Q9P0R6   | NA                     |
| 3983 | MPYNSQYLNVPVYS | gi 32699623 sp Q9UPX6   | NA                     |
| 3984 | MCVEDIYANIFII  | gi 18202619 sp Q92508 I | NA                     |
| 3985 | GMTWEVYGAAVDP  | gi 15079708 gb AAH116   | NA                     |
| 3986 | RPYQDVYVNVVDP  | gi 20140440 sp O75140 I | NA                     |
| 3987 | SRTPAYYPNAGLI  | gi 114062 sp P08519 AP  | NA                     |
| 3988 | VRIGEKYVDMSVK  | gi 1352049 sp P48047 A  | NA                     |
| 3989 | SIFFIYIIIIAF   | gi 6165981 sp Q13936 C  | NA                     |
| 3990 | SVFFIVYIIIIAF  | gi 6165989 sp O60840 C  | NA                     |
| 3991 | ICFFCSYIIISFL  | gi 44889019 sp P35499   | NA                     |
| 3992 | ERRYTPYPNLYPD  | gi 1705910 sp P51797 C  | NA                     |
| 3993 | YFTTRTYGEPESA  | gi 1706639 sp P50402 E  | [YFTTRTYGEPESA Y 1C    |
| 3994 | WGRRRPYILT LGV | gi 145572854 sp Q9UMX   | NA                     |
| 3995 | LAKLEKYYLKNSP  | gi 41688714 sp Q8TB72   | NA                     |
| 3996 | VDLIKTYKHINEV  | gi 3219996 sp Q13627 D  | NA                     |
| 3997 | NEPAVLNPKDRY   | gi 3043372 sp P11055 M  | NA                     |
| 3998 | YSPHTAYDAAPQG  | gi 20978527 sp Q9GZT8   | NA                     |
| 3999 | G3:17          | contol_spot             | NA                     |
| 4000 | G7:17          | contol_spot             | NA                     |
| 4001 | YACAGGYVDVVKV  | gi 119626061 gb EAX05   | NA                     |
| 4002 | DAENSPYLNPLV   | gi 50402102 sp P62508 E | NA                     |
| 4003 | LAHFEDYKSVEMV  | gi 74747057 sp Q5VU65   | NA                     |

|                     |                                           |
|---------------------|-------------------------------------------|
| 4004 PEQETFYEQPPLV  | gi 51316115 sp Q9UJU6 [PEQETFYEQPPLV Y 34 |
| 4005 CHVEGDYIGSQNV  | gi 23821958 sp Q8TCZ9 NA                  |
| 4006 LAKEGNYAIVANV  | gi 24418674 sp Q96A65 NA                  |
| 4007 DGDGDFYIEPTSG  | gi 22095551 sp Q9NYQ6 NA                  |
| 4008 TSSNDWYWNGSSG  | gi 1655422 dbj BAA1143 NA                 |
| 4009 GQNEVDYRQKQVV  | gi 20455356 sp Q9BZX2 NA                  |
| 4010 PPDFPYHDEGWV   | gi 17433016 sp P78357 NA                  |
| 4011 DSSFGKYGRNAYV  | gi 6685306 sp P56746 C NA                 |
| 4012 NSSDLLYDDLYDD  | gi 74749761 sp Q712K3 NA                  |
| 4013 EEEFNDYEANDPW  | gi 48429262 sp Q9H9E3 NA                  |
| 4014 FPEDASYSVPAPW  | gi 74717666 sp Q9BY79 NA                  |
| 4015 PFEGPNYHIAPRW  | gi 119593162 gb EAW72 NA                  |
| 4016 SCEDSTYQLWNW   | gi 21264534 sp P20333 NA                  |
| 4017 VEMKEIYTSNHMW  | gi 17366467 sp Q14643 NA                  |
| 4018 EANRYDYVHVGTV  | gi 62297775 sp Q13255 NA                  |
| 4019 TDDEYTYLNWYLQ  | gi 119578133 gb EAW57 NA                  |
| 4020 ITASPDYLEIAIY  | gi 120049 sp P21802 FG NA                 |
| 4021 LQKGQKYFDSGHY  | gi 113416910 ref XP_934 NA                |
| 4022 QVPKTLYKDKGHY  | gi 134048661 sp P23352 NA                 |
| 4023 SSVKSEYTDWPGY  | gi 119568301 gb EAW47 NA                  |
| 4024 CGSDVGYIRYTLY  | gi 37537905 sp P59901 L NA                |
| 4025 SLFSEPYKTNKGD  | gi 126302515 sp P51826 NA                 |
| 4026 EYKNFYAAVPSA   | gi 51315838 sp Q10471 NA                  |
| 4027 EGYEGYYSQSQGD  | gi 62511098 sp Q07666 NA                  |
| 4028 VFEGRIYVSGGHD  | gi 30179881 sp O94889 NA                  |
| 4029 FPEDPSYDANVID  | gi 20178276 sp P54646 NA                  |
| 4030 VADMLEYVPVKKD  | gi 29429215 sp Q12769 NA                  |
| 4031 IQNERTYVDPQP   | gi 24211557 sp Q9NZA1 NA                  |
| 4032 VPPVDGYVMVLQP  | gi 23396490 sp O94985 NA                  |
| 4033 HKQKGGYTESQRP  | gi 119601418 gb EAW81 NA                  |
| 4034 QVSGTEYEVAQRP  | gi 145559527 sp Q8IWWY NA                 |
| 4035 QVWEECYSQVLYL  | gi 73619933 sp Q99459 NA                  |
| 4036 YAEAEAPYDAIHVG | gi 2507187 sp P22061 PI NA                |
| 4037 GGNMPGYLRPETA  | gi 21264523 sp P41250 NA                  |
| 4038 AWEMKPYAVMALE  | gi 141795194 gb AAI250 NA                 |
| 4039 FISESQYTYALKE  | gi 85681919 sp P08603 NA                  |
| 4040 RIANEKYLRTHKE  | gi 119573802 gb EAW53 NA                  |
| 4041 AGMQTKYLDVGGW  | gi 85681909 sp P19801 NA                  |
| 4042 DGSVTGYKDAYVG  | gi 74753330 sp Q9UHN6 NA                  |
| 4043 <<Marker>>     | contol_spot NA                            |
| 4044 GRIEHLKPNQAH   | gi 9087147 sp O60547 G NA                 |
| 4045 NCEEKDYTIWLAH  | gi 84028263 sp Q99523 NA                  |
| 4046 SVEDLLYVRDNTA  | gi 55665746 emb CAH71 NA                  |
| 4047 IACEQDYVATLSE  | gi 148753299 gb AAI426 NA                 |
| 4048 QVGKEYATSSE    | gi 67472130 sp Q6WKZ4 NA                  |
| 4049 IISERKYSRKKTE  | gi 134035376 sp Q5TYW NA                  |
| 4050 EDLKDTYASLGKT  | gi 400266 sp Q02045 ML NA                 |
| 4051 NTWNEKYSSLQKT  | gi 74708186 sp Q5TKA1 NA                  |
| 4052 YKEMVDYSNTYKT  | gi 20532121 sp Q969F9 NA                  |
| 4053 LNGEPGYTIGTVL  | gi 154816130 dbj BAF75 NA                 |
| 4054 LPSCFDYVMHFLT  | gi 152012479 gb AAI501 NA                 |
| 4055 PSEGDDYIFHCHP  | gi 116241283 sp Q92793 NA                 |

|                    |                                             |
|--------------------|---------------------------------------------|
| 4056 FSEFDYELAMST  | gi 74728477 sp Q8N0Z2  NA                   |
| 4057 TIQKGSYTFVPWL | gi 13124573 sp Q9Y275  NA                   |
| 4058 IQWNGDYQVAGTT | gi 11131377 sp Q9UKP4 NA                    |
| 4059 SDYVERYMNSDTT | gi 37999759 sp Q96ST3  NA                   |
| 4060 EAWELGYTGKGV  | gi 13124785 sp P16519  NA                   |
| 4061 KSSGCAYQDVGVT | gi 129825 sp P05164 PE NA                   |
| 4062 TLSDPYVLDQAV  | gi 82581628 sp Q5K4L6  NA                   |
| 4063 FKCNSGYVVQDDV | gi 67462103 sp Q9UNQC NA                    |
| 4064 <<Marker>>    | contol_spot NA                              |
| 4065 MAEESIYICGQDV | gi 119603141 gb EAW82 NA                    |
| 4066 RSRAEGYEKTDDV | gi 8134331 sp Q9Y2Q0  NA                    |
| 4067 AYGKEGYGSLEEV | gi 23396602 sp Q9Y680  NA                   |
| 4068 LKNPQDYINCAEV | gi 119570675 gb EAW50 NA                    |
| 4069 FQISDIYISGESG | gi 56405387 sp Q9UPN3 NA                    |
| 4070 TEKGEVYFIDHNT | gi 88909269 sp Q86UL8  NA                   |
| 4071 TYDDRAYSSFGGG | gi 18276665 sp Q15056 I [TYDDRAYSSFGGG Y 1  |
| 4072 LPKSYDYDLIIG  | gi 50403780 sp Q16881  [LPKSYDYDLIIG Y 13 Q |
| 4073 IDLGTYSYCVGVF | gi 147744565 sp P08107 [IDLGTYSYCVGVF Y 15  |
| 4074 GGEPLSYTRFSLA | gi 108935939 sp P02786 [GGEPLSYTRFSLA Y 2C  |
| 4075 FMREKEYLQVMHF | gi 20178315 sp O95340 I NA                  |
| 4076 MVEVDIYESGKHF | gi 119575831 gb EAW55 NA                    |
| 4077 WYFGLHYVDNKG  | gi 125987826 sp P15311 NA                   |
| 4078 DLNAVKYVSNIKF | gi 24657779 gb AAH392  NA                   |
| 4079 HTISGDYVIMTIF | gi 27820121 sp Q8N1C3 NA                    |
| 4080 DQSQPPYYNVTAM | gi 126306 sp P07098 LIP NA                  |
| 4081 VSYDPLYAVFAVF | gi 118572729 sp Q9BZW NA                    |
| 4082 LQYSTDYTFKAYF | gi 33112650 sp P08575 C NA                  |
| 4083 HYTCQYGNKACM  | gi 116242598 sp Q9Y21  NA                   |
| 4084 DHREDVYLYISGH | gi 71152375 sp Q5T5N4  NA                   |
| 4085 <<Marker>>    | contol_spot NA                              |
| 4086 FLHNEGYSMCGH  | gi 74731582 sp Q96EM0 NA                    |
| 4087 HMNEYEYACIKHH | gi 21757891 dbj BAC052 NA                   |
| 4088 ATEKSSYFQTTEI | gi 55977888 sp Q9UDV6 NA                    |
| 4089 DTTSDYLRSYFI  | gi 1352692 sp P47900 P NA                   |
| 4090 SGRELSYVLLAGI | gi 2495077 sp Q14833 M NA                   |
| 4091 AESSQEYVTLQGI | gi 74736252 sp Q5XKL5  NA                   |
| 4092 GILNGKYKRNGHI | gi 2501506 sp Q16880 C NA                   |
| 4093 PSAEAEYWRIRAM | gi 147742985 sp Q5TH6  NA                   |
| 4094 SSRTPGYKSVLRI | gi 117949795 sp Q6N02  NA                   |
| 4095 AVNTSKYAESYRI | gi 60390262 sp O95453 I NA                  |
| 4096 YLNEPNYEALISI | gi 119569993 gb EAW49 NA                    |
| 4097 MKKNEVYETFSYP | gi 47117336 sp Q9UN30 NA                    |
| 4098 GVFKHGYEKYNTI | gi 94707511 sp Q3L8U1  NA                   |
| 4099 EAVNFSYSDNAVI | gi 119616159 gb EAW95 NA                    |
| 4100 ADGMEDYEQELCG | gi 13623635 gb AAH064  NA                   |
| 4101 LFHETLYQKADDG | gi 113606 sp P04075 ALI NA                  |
| 4102 WDSSGCYVEEGDG | gi 50400545 sp Q8IZF2 C NA                  |
| 4103 WEYDESYCDAVKK | gi 34921397 sp O75063 I NA                  |
| 4104 GLSDDYYGAKNLK | gi 2497506 sp Q92796 D NA                   |
| 4105 VSCTPLYVEIRLK | gi 74754109 sp Q4W4Y0 NA                    |
| 4106 <<Marker>>    | contol_spot NA                              |
| 4107 RGSDDDYDFCRAL | gi 20138528 sp Q9Y6Y9  NA                   |

|      |                |                                              |
|------|----------------|----------------------------------------------|
| 4108 | HSMKKKYECNKCL  | gj 23397010 sp Q9NR11 NA                     |
| 4109 | RREEGIYSILVAL  | gj 1351993 sp Q04656 A NA                    |
| 4110 | RGEERPYCEICEM  | gj 266902 sp P30622 CL NA                    |
| 4111 | SNEADIYSFLKGM  | gj 131756 sp P20742 PZ NA                    |
| 4112 | LQSEAAAYCCVSEL | gj 59803038 sp Q93050 NA                     |
| 4113 | IAIKNKYASSKLL  | gj 5921731 sp O95067 C NA                    |
| 4114 | TSYHHSYEDTGLL  | gj 29840846 sp Q10713 I NA                   |
| 4115 | HTGEKPYVCPYEG  | gj 74762721 sp Q9BZE0 NA                     |
| 4116 | EHCWVLYVDVLLL  | gj 21362903 sp Q15024 I NA                   |
| 4117 | YYGEDDYPIVRLL  | gj 46397079 sp P60852 z NA                   |
| 4118 | HDGKDNHWNLYLL  | gj 119625348 gb EAX04 NA                     |
| 4119 | EVQRDPYSNYGHG  | gj 59797947 sp Q8IUH3 I NA                   |
| 4120 | GGSMEDYCDSPHG  | gj 48427907 sp O75044 I NA                   |
| 4121 | ILKESKYKRSSGG  | gj 67460301 sp Q6V1X1 NA                     |
| 4122 | KMKKDIYWDDSA   | gj 38503351 sp Q8N1M1 NA                     |
| 4123 | PKSTDYKPFSSGG  | gj 150036319 emb CAM1 NA                     |
| 4124 | TGYNDHYMYLNHG  | gj 119615886 gb EAW95 NA                     |
| 4125 | TSMFDDYQGDSST  | gj 143811474 sp P17948 [TSMFDDYQGDSST Y 1    |
| 4126 | VAMHVAYRRHEKK  | gj 77416855 sp P29033 C NA                   |
| 4127 | <<Marker>>     | contol_spot NA                               |
| 4128 | DDPEAVYTTTGGK  | gj 146345416 sp Q15375 NA                    |
| 4129 | DEDEDDYHNPGYL  | gj 14194891 sp O43561 I NA                   |
| 4130 | VMLGAGYWYRARL  | gj 1235674 gb AAC5040 NA                     |
| 4131 | VQLPATYMNLGPS  | gj 585912 sp Q04912 RC [VQLPATYMNLGPS Y 1:   |
| 4132 | GLARDIYKNDYYR  | gj 126302596 sp P08922 NA                    |
| 4133 | GMSRNLYAGDYR   | gj 729008 sp Q08345 DD NA                    |
| 4134 | GRGTDEYFIRKPP  | gj 21903373 sp P11230 / NA                   |
| 4135 | HDTEMKYIVHLK   | gj 3219996 sp Q13627 D NA                    |
| 4136 | AMLMEKYHVDHDE  | gj 9626638 ref NP_0409 NA                    |
| 4137 | IHKPGSYIFRLSC  | gj 115855 sp P22681 CB NA                    |
| 4138 | GMTRDIYETDYR   | gj 33112647 sp P06213 I [GMTRDIYETDYR Y 11   |
| 4139 | YEEHIPYTHMNGG  | gj 33112647 sp P06213 I [YEEHIPYTHMNGG Y 1:  |
| 4140 | PVDPATYGGFYGG  | gj 121116 sp P06396 GE [PVDPATYGGFYGG Y 4    |
| 4141 | GASTGIYEALRL   | gj 134254702 gb ABO65 [GASTGIYEALRL Y 44     |
| 4142 | PSDSLIYDDGLSE  | gj 547807 sp P07949 RE [PSDSLIYDDGLSE Y 10:  |
| 4143 | RKVGPGYLGSGGS  | gj 547807 sp P07949 RE [RKVGPGYLGSGGS Y 8    |
| 4144 | RSNDKVYENVTGL  | gj 3183518 sp Q05397 F [RSNDKVYENVTGL Y 9:   |
| 4145 | KGPTCQYRAAQSG  | gj 29337230 sp Q13444 / [KGPTCQYRAAQSG Y 7   |
| 4146 | APQDVTYAQLHSL  | gj 37537904 sp O75023 I NA                   |
| 4147 | RVKEEGYELPYNP  | gj 17366642 sp Q99704 I [RVKEEGYELPYNP Y 3:  |
| 4148 | <<Marker>>     | contol_spot NA                               |
| 4149 | TPSSPVYQDAVSY  | gj 45382633 ref NP_9907 [TPSSPVYQDAVSY Y 4:  |
| 4150 | SRGQEVYVKKTMG  | gj 464868 sp Q02763 TIE [SRGQEVYVKKTMG Y 9   |
| 4151 | KGPNVYDFSQAH   | gj 62906893 sp Q9Y5V3 [KGPNVYDFSQAH Y 9      |
| 4152 | GYNDDYEEESYFT  | gj 1706639 sp P50402 EI [GYNDDYEEESYFT Y 9:  |
| 4153 | APQWEGYDELQTD  | gj 2493285 sp P55957 BI [APQWEGYDELQTD Y :   |
| 4154 | DSPNKLYTLVTYV  | gj 51702807 sp P62899 F [DSPNKLYTLVTYV Y 10  |
| 4155 | NARLSIYGIWIFYD | gj 60389833 sp Q8IZD4 I [NARLSIYGIWIFYD Y 11 |
| 4156 | TISQEAQYDQRQDT | gj 3023518 sp Q99426 TI [TISQEAQYDQRQDT Y 11 |
| 4157 | TTLSDSYNYSGTE  | gj 50401753 sp Q7Z3T8 [TTLSDSYNYSGTE Y 21    |
| 4158 | RHYEDGYPPGSDN  | gj 14916543 sp O60716 C [RHYEDGYPPGSDN Y :   |
| 4159 | RGYISPYFINTSK  | gj 129379 sp P10809 CH [RGYISPYFINTSK Y 227  |

|      |                |                         |                         |
|------|----------------|-------------------------|-------------------------|
| 4160 | AHDGGIYAIWSP   | gj 12643636 sp O75083   | [AHDGGIYAIWSP Y 23      |
| 4161 | YGGYDDYNGYNDG  | gj 1710632 sp P31943 H  | [YGGYDDYNGYNDG Y ;      |
| 4162 | LVVEEYEVLDHC   | gj 6226814 sp O00170 A  | [LVVEEYEVLDHC Y 24      |
| 4163 | QPNEAVYTKMMTK  | gj 116242483 sp P11413  | [QPNEAVYTKMMTK Y 4      |
| 4164 | CEICGNITYRGPK  | gj 17380310 sp Q12874 ; | [CEICGNITYRGPK Y 41     |
| 4165 | AKDKPVYDELFTY  | gj 18202935 sp Q9H223   | [AKDKPVYDELFTY Y 45     |
| 4166 | ARQAHLYRGIFPV  | gj 20178296 sp P14618   | NA                      |
| 4167 | QATTNVYQVQTGS  | gj 17376322 sp Q14161 ; | [QATTNVYQVQTGS Y 4      |
| 4168 | VQTGSEYTDTSNH  | gj 17376322 sp Q14161 ; | [VQTGSEYTDTSNH Y 4      |
| 4169 | <<Marker>>     | contol_spot             | NA                      |
| 4170 | YYAKKDYNEAYNY  | gj 46397879 sp Q99615   | NA                      |
| 4171 | RADFDHYTGRDSE  | gj 84029396 sp Q86SQ0   | NA                      |
| 4172 | QGPPEIYSDTQFP  | gj 119599582 gb EAW79   | [QGPPEIYSDTQFP Y 19     |
| 4173 | YKSYSPYDMLESI  | gj 113950 sp P07355 AN  | [YKSYSPYDMLESI Y 23;    |
| 4174 | ERYTEFYHVPHTS  | gj 47605572 sp Q96HC4   | [ERYTEFYHVPHTS Y 2;     |
| 4175 | WKLQMIYGNGAES  | gj 149944486 ref NP_00  | [WKLQMIYGNGAES Y 2      |
| 4176 | PLEDEYYYDVEND  | gj 74583475 sp Q04383   | NA                      |
| 4177 | PVFKPTYEQFEDF  | gj 731532 sp P39956     | RP NA                   |
| 4178 | LSRMKDYSNIVEP  | gj 731532 sp P39956     | RP NA                   |
| 4179 | NPDSEEYKKFKEK  | gj 1168370 sp P22149    | AI NA                   |
| 4180 | CASCEIYSCECTF  | gj 129733 sp P12383     | PD NA                   |
| 4181 | KLLEEKYNDNYVY  | gj 1708905 sp P53338    | M NA                    |
| 4182 | KKQEGKYKEKNL   | gj 74645031 sp Q12180   | NA                      |
| 4183 | DFFRDYYGNSGSN  | gj 2506885 sp P32607    | R NA                    |
| 4184 | TLEPGYESRTGS   | gj 729140 sp P40917     | YA NA                   |
| 4185 | PSSGGAYSNLPR   | gj 1168610 sp P41696    | A NA                    |
| 4186 | NNSIPEYFNNSHV  | gj 2506540 sp P20134    | SI NA                   |
| 4187 | ENKQDIYGSSPTT  | gj 74583758 sp Q08887   | NA                      |
| 4188 | DGRVEPYVDFAEF  | gj 10720303 sp Q15750   | NA                      |
| 4189 | GSYMWIYVFMGNM  | gj 12643959 sp Q9Y6L6   | NA                      |
| 4190 | <<Marker>>     | contol_spot             | NA                      |
| 4191 | IVFETAYNTNENM  | gj 50400552 sp Q8N3C0   | NA                      |
| 4192 | QPEENPYWWNANM  | gj 119610135 gb EAW89   | NA                      |
| 4193 | TDFESGYSEIFLM  | gj 23396772 sp Q13822   | NA                      |
| 4194 | WPNKNTYKSIQMM  | gj 20141712 sp P29508   | NA                      |
| 4195 | IRCEEPYLRISDN  | gj 12643876 sp Q9UBX5   | NA                      |
| 4196 | KQDEVVYDPCEN   | gj 152112352 sp Q8TF3   | NA                      |
| 4197 | PGWHLASYVDVKDN | gj 119621884 gb EAX01   | NA                      |
| 4198 | RSNYDQYGDAGEN  | gj 108936027 sp Q9Y2G   | NA                      |
| 4199 | TLPCQAYVNQGEN  | gj 119572941 gb EAW52   | NA                      |
| 4200 | AEFDDKYLITGFN  | gj 118572727 sp O60522  | NA                      |
| 4201 | LLSNPAYRLLLAT  | gj 729008 sp Q08345     | DC [LLSNPAYRLLLAT Y 51; |
| 4202 | LPGVRTYIDPHTY  | gj 1706628 sp P54756    | EI NA                   |
| 4203 | ACEHRGYLYLAIE  | gj 464868 sp Q02763     | TIE [ACEHRGYLYLAIE Y 89 |
| 4204 | LYEKFTYAGIDCS  | gj 464868 sp Q02763     | TIE [LYEKFTYAGIDCS Y 11 |
| 4205 | MLNSKGYTKSIDI  | gj 232066 sp P27361     | MK [MLNSKGYTKSIDI Y 20; |
| 4206 | MVLKHPYPRKVEE  | gj 51317293 sp Q9UN19   | NA                      |
| 4207 | VALDDPYENYRRN  | gj 119226260 ref NP_00  | NA                      |
| 4208 | GEKEEVYIVQASN  | gj 92087039 sp P10911   | NA                      |
| 4209 | TMKEKIYTMIIYRN | gj 17483726 gb AAL401   | NA                      |
| 4210 | CSRRNMYVNIYVN  | gj 119578974 gb EAW58   | NA                      |
| 4211 | FVKKKGYVRLHTN  | gj 23813917 sp Q13356   | NA                      |

|      |                |                                              |
|------|----------------|----------------------------------------------|
| 4212 | LNSGSEYVPAGPQ  | gj 13629029 sp Q08397 I NA                   |
| 4213 | FQ GKDIYEMNLSQ | gj 6686181 sp Q9Y2G7 Z NA                    |
| 4214 | GYGEESYPAKDSQ  | gj 2493260 sp Q16825 P NA                    |
| 4215 | RPSMEGYRAPS RQ | gj 14916543 sp O60716 C NA                   |
| 4216 | EEGKPGYLDCLTQ  | gj 116242736 sp Q13308 NA                    |
| 4217 | ISSDPRYWYGKTQ  | gj 11182425 sp P56524 F NA                   |
| 4218 | SSEENYYSTSYSQ  | gj 47117238 sp Q8IWW€ NA                     |
| 4219 | RYRADEYQPPDGG  | gj 38258175 sp Q8NBP7 NA                     |
| 4220 | SEAKERYQQGNGG  | gj 34783880 gb AAH096€ NA                    |
| 4221 | QLSPGIYDDTSAR  | gj 47117817 sp O75376 I NA                   |
| 4222 | SLNSGNYLNPACR  | gj 47117338 sp Q9UQR0 NA                     |
| 4223 | SPCEDFYQFSCGG  | gj 20178279 sp O60344 I NA                   |
| 4224 | EVVEIEYVEKYTA  | gj 20140802 sp Q9GZL7  NA                    |
| 4225 | QTYNVDYVDAEGR  | gj 51316029 sp Q8NCQ5 NA                     |
| 4226 | AKVEGRYEVT DHR | gj 2138330 gb AAB5838z NA                    |
| 4227 | DVEKFKYKTPQHR  | gj 23396536 sp Q9NX36  NA                    |
| 4228 | KKWCDDYFFIAHR  | gj 67476671 sp P36551 F NA                   |
| 4229 | RSTRPLYISVGHR  | gj 119610015 gb EAW89 NA                     |
| 4230 | WLKDNDYLLHGHR  | gj 38372248 sp Q96A54  NA                    |
| 4231 | TSDKPYECKIRGC  | gj 30173473 sp Q96T25  NA                    |
| 4232 | CVSSGRYAVFGLG  | gj 143678193 sp Q9NV6€ NA                    |
| 4233 | IPVDNLYAEP AVL | gj 46397477 sp P60891 F NA                   |
| 4234 | MEDGSPYVNGSLG  | gj 74758950 sp Q76FK4  NA                    |
| 4235 | FDRNADYVQEVKR  | gj 52783098 sp Q9HCJ6  NA                    |
| 4236 | GLPENGYQILYKR  | gj 22002000 sp Q9BYH1 NA                     |
| 4237 | AAAEAGGYQRYGVR | gj 74750784 sp Q8IZ57 N NA                   |
| 4238 | GDPVNYVDTAVR   | gj 417719 sp P23396 RS NA                    |
| 4239 | LPSEVLYMLKNVR  | gj 152032658 sp Q6ZV2€ NA                    |
| 4240 | RCNNLGYEINKVR  | gj 126314 sp P06858 LIP NA                   |
| 4241 | CASLDHYSRLGWR  | gj 148841196 sp A2VEC€ NA                    |
| 4242 | IVSGLKYVQHTYR  | gj 1707893 sp P52566 G NA                    |
| 4243 | LPPNWKYESSTAS  | gj 50403608 sp P62277 F NA                   |
| 4244 | WGSNQNYICNTDP  | gj 45477011 sp O75113 I NA                   |
| 4245 | AMCTPSYLSTAAA  | gj 143458429 sp Q9P2F€ NA                    |
| 4246 | FCFYLKYNMYAS   | gj 21263618 sp Q9BXC1 NA                     |
| 4247 | GCSNPLYPGVYAS  | gj 120660130 gb AAI304€ NA                   |
| 4248 | ISGDSGYTNYADS  | gj 32899 emb CAA78209 NA                     |
| 4249 | PCGNVNYGYQQQG  | gj 146328566 sp Q9UM7 [PCGNVNYGYQQQG Y       |
| 4250 | CSVEELYAIP PDA | gj 118572719 sp Q9H79z NA                    |
| 4251 | ETKTITYESPQID  | gj 17432978 sp O43491 I [ETKTITYESPQID Y 889 |
| 4252 | QDSIFEYFNTAPL  | gj 92090617 sp Q9Y5S2  [QDSIFEYFNTAPL Y 95€  |
| 4253 | EQPAPGYDTHGRL  | gj 85700443 sp Q07157 z NA                   |
| 4254 | HVAYGGYSTPEDR  | gj 55976600 sp Q9HBL0  NA                    |
| 4255 | DPAETDYTAVGCA  | gj 81175200 sp Q9Y490  NA                    |
| 4256 | YYAYMYANIMVL   | gj 113697 sp P23109 AM NA                    |
| 4257 | YRARETYGLPNTL  | gj 19856545 sp P17405 z NA                   |
| 4258 | KKLLGKYPNV DAR | gj 2498228 sp Q16739 C NA                    |
| 4259 | LSEDCLYLN VWIP | gj 116353 sp P06276 CH NA                    |
| 4260 | IDLLRRYL RVETI | gj 2138330 gb AAB5838z NA                    |
| 4261 | LAQEVTYANLRPF  | gj 84028279 sp P38435  NA                    |
| 4262 | VKDTCSYVNV LSD | gj 13432151 sp P46976 C NA                   |
| 4263 | GDFPYYYANLGLK  | gj 20141422 sp Q16394 I NA                   |

|      |                |                                            |
|------|----------------|--------------------------------------------|
| 4264 | HPDYEEYINLEGT  | gi 46397678 sp Q13017 I HPDYEEYINLEGT Y 30 |
| 4265 | IASPPSYENVRHK  | gi 51338611 sp P84095 F NA                 |
| 4266 | KVVNPYYLRVRRK  | gi 78099208 sp Q13131 , NA                 |
| 4267 | GNLGSVYIYVLLI  | gi 121509 sp P15509 CS NA                  |
| 4268 | AVALDRYL RVVHP | gi 60416427 sp O00270 ( NA                 |
| 4269 | FFNLSIYLNQRR   | gi 17367264 sp Q9Y5N1 NA                   |
| 4270 | YEEHIPYTHMNGG  | gi 33112647 sp P06213 I YEEHIPYTHMNGG Y 1: |
| 4271 | PEGGVVDYKNIHLE | gi 547770 sp P07333 CS PEGGVVDYKNIHLE Y 69 |
| 4272 | NGNNYVYIDPTQL  | gi 125472 sp P10721 KIT NGNNYVYIDPTQL Y 56 |
| 4273 | KEMENFYVFHNGS  | gi 68052338 sp Q86SJ2 , NA                 |
| 4274 | LYLSSEYEAPGS   | gi 33517138 sp Q9H5J0 , NA                 |
| 4275 | DFWGDDYKNHVKC  | gi 71153817 sp Q9NX58 NA                   |
| 4276 | FPEENIYKVYKKC  | gi 116242504 sp Q8TE8 , NA                 |
| 4277 | KDCKDPYCPPSLC  | gi 55742730 ref NP_064 , NA                |
| 4278 | LQRWDKYSNKMLC  | gi 113421409 ref XP_001 NA                 |
| 4279 | KLQELYEIVHVL   | gi 29470284 gb AAO130 NA                   |
| 4280 | DDDDDPYYYYYKS  | gi 146325723 sp Q149N , NA                 |
| 4281 | GPSMDTYGETFLS  | gi 88974674 ref XP_9327 NA                 |
| 4282 | PLRCLIYIEVALS  | gi 114559150 ref XP_001 NA                 |
| 4283 | ALKKSGYNNKHLS  | gi 120953300 ref NP_00 NA                  |
| 4284 | KIMEKKYHNVGLS  | gi 13124489 sp Q14103 I NA                 |
| 4285 | EGDEELYFHFKFP  | gi 146345416 sp Q15375 NA                  |
| 4286 | FTNMLGYTDHQFP  | gi 57015285 sp O75390 ( NA                 |
| 4287 | PNSNLDYMFKFP   | gi 24212102 sp P59045 † NA                 |
| 4288 | AGEELLYDYGDRS  | gi 25091219 sp Q9NQR1 NA                   |
| 4289 | ASPDWGYDDKNGP  | gi 115449 sp P00915 CA NA                  |
| 4290 | GPRESSYMEMKGP  | gi 119573284 gb EAW52 NA                   |
| 4291 | ADSEVLYPNYQSC  | gi 68052821 sp Q9NPH0 NA                   |
| 4292 | LGEDTDYLIYDTC  | gi 24308334 ref NP_115 , NA                |
| 4293 | TDSGIFYEDSGYS  | gi 74749781 sp Q71RS6 NA                   |
| 4294 | GLEKKKYERGSAT  | gi 21542165 sp O00541 I NA                 |
| 4295 | PLFKLKYPSSPYS  | gi 71153522 sp Q96AY4 NA                   |
| 4296 | CDCTPDYTRK SCT | gi 114205558 gb AAI056 NA                  |
| 4297 | VAENPEYLSEFSL  | gi 3913590 sp Q15303 E VAENPEYLSEFSL Y 12  |
| 4298 | GAFGT VYKGLWIP | gi 2811086 sp P00533 E NA                  |
| 4299 | LNTTATYAEPYRP  | gi 20139104 sp Q99569 I LNTTATYAEPYRP Y 47 |
| 4300 | PSRDPHYQDPHST  | gi 2811086 sp P00533 E PSRDPHYQDPHST Y 1   |
| 4301 | RAVENQYSFY     | gi 34098358 sp O14492 , RAVENQYSFY Y 618 Q |
| 4302 | SFPDQAYANSQPA  | gi 74753488 sp Q9Y3P8 , SFPDQAYANSQPA Y 1: |
| 4303 | AFDNPDYWHSRLF  | gi 119534 sp P21860 ER AFDNPDYWHSRLF Y 1   |
| 4304 | GLARDIYKDPDYV  | gi 1718189 sp P35916 V GLARDIYKDPDYV Y 10  |
| 4305 | KFNEENYGVKTTY  | gi 52000729 sp Q8WWW KFNEENYGVKTTY Y 2:    |
| 4306 | TATEGQYQPQP    | gi 125474 sp P06239 LCI TATEGQYQPQP Y 505  |
| 4307 | AENTITYSLLMHP  | gi 8039788 sp P31994 F AENTITYSLLMHP Y 29: |
| 4308 | GELKTGYLSIVMD  | gi 9087218 sp P35968 V GELKTGYLSIVMD Y 80  |
| 4309 | FITEEDYQALRTS  | gi 1705916 sp Q00610 C FITEEDYQALRTS Y 14: |
| 4310 | GTRERLYEWISID  | gi 119595261 gb EAW74 GTRERLYEWISID Y 88:  |
| 4311 | LRNDQVYQPLRDR  | gi 115985 sp P04234 CD LRNDQVYQPLRDR Y 1   |
| 4312 | PLDKDYVVREPG   | gi 50403745 sp P52333 , PLDKDYVVREPG Y 9:  |
| 4313 | PTLVQTYVLQGDP  | gi 729564 sp Q99062 CS PTLVQTYVLQGDP Y 7:  |
| 4314 | RKTRDQYLMWLTQ  | gi 118572681 sp P27986 RKTRDQYLMWLTQ Y :   |
| 4315 | HRPSRQYATR DVY | gi 21542431 sp O14828 , HRPSRQYATR DVY Y 3 |

4316 QGQNQLYNELNLG gj|23830999|sp|P20963|C [QGQNQLYNELNLG|Y|7  
4317 SPRHALYPPSPRK gj|50897492|sp|Q92738|I [SPRHALYPPSPRK|Y|5  
4318 ADNDKEYLVLTLT gj|42560209|sp|P60484|F [ADNDKEYLVLTLT|Y|31  
4319 DRDDAQYSHLGGN gj|115985|sp|P04234|CD [DRDDAQYSHLGGN|Y|1  
4320 FMDGSPYAHMFEM gj|14548162|sp|Q13224|I [FMDGSPYAHMFEM|Y|1  
4321 PTDSNFYARLMDE gj|2811086|sp|P00533|E NA  
4322 FCGTPDYIAPEIL gj|400135|sp|Q02156|KP NA  
4323 GSSDNEYFYVDFR gj|544320|sp|P36888|FL [GSSDNEYFYVDFR|Y|5  
4324 LYHKKS Y gj|74762751|sp|Q9HD26 [DDLHTLYHKKS Y|Y|457  
4325 RKHYQPYAPPRDF gj|115973|sp|P10747|CD [RKHYQPYAPPRDF|Y|2  
4326 SLWNPTYGSWFTE gj|146328566|sp|Q9UM7 [SLWNPTYGSWFTE|Y|1  
4327 SDSGYSYETIGKT gj|1170875|sp|P46821|M NA  
4328 PLGPQNYGGAMRP gj|27734570|sp|P81877|E NA  
4329 VIQYLAYVASSHK gj|6166599|sp|P35579|M NA  
4330 DGRHNVYIHVESK gj|74750445|sp|Q86V20| NA  
4331 TLMTGLYQTSWGR gj|20336274|ref|NP\_602 NA  
4332 AYDPYAYPSDYDM gj|23396631|sp|Q9Y262| NA  
4333 EWRPFYPRRRRP gj|46397351|sp|Q9Y276| NA  
4334 EDHAGTYGLGDRK gj|13124806|sp|P10636| NA  
4335 KKDEGSYDLGERK gj|464745|sp|P34741|SD NA  
4336 EQIGLLYQEYRDK gj|114152090|sp|Q8N5V NA  
4337 SAVGFDYQGKTEK gj|2498954|sp|Q14247|S NA  
4338 SALQLLYTAKEAG gj|81175200|sp|Q9Y490| NA  
4339 EPEVRYLRQILS gj|51338822|sp|Q9H4B4| NA  
4340 SLDGPEYEEEEVA gj|121743|sp|P20936|RA NA  
4341 LEPEVRYLRQIL gj|51338822|sp|Q9H4B4| NA  
4342 HERMPWYHSSLTR gj|1177044|sp|P43403|Z NA  
4343 SDSLLDYSCMQRL gj|10720350|sp|Q9Y487| NA  
4344 EDADRKYEEVARK gj|136092|sp|P09493|TP NA  
4345 KGKEKIYSAESFL gj|37542493|gb|AAL154 NA  
4346 SKTVFYGGSDKD gj|74735515|sp|O75563| NA  
4347 EMPPHIYAITDTA gj|6166599|sp|P35579|M NA  
4348 AGKKKKYLKAALY gj|28201851|sp|Q96DU9 NA  
4349 STLTRDYNLSLTRS gj|13638154|sp|P16144| NA  
4350 KFYIDPYKLLPLQ gj|51828015|sp|Q9NY12| NA  
4351 VKTPGNYESKRQR gj|32469769|sp|Q96L73| NA  
4352 KASGANYSFHKES gj|51316115|sp|Q9UJU6| NA  
4353 PITIARYGRSRNK gj|74762638|sp|Q92519| NA  
4354 MEENELYSSAVTV gj|143220234|sp|O60496 [MEENELYSSAVTV|Y|1  
4355 PKDTAIYQKDEAL gj|51338794|sp|P78559| NA  
4356 CRLQTM YEMEMSG gj|38372886|sp|Q9BX12| NA  
4357 VFGLSLYTTERDL gj|51703330|sp|P62995| NA  
4358 GEARALYNIGNVY gj|74759541|sp|Q86YR5| NA  
4359 EADRDTYRRSAVP gj|1173177|sp|P46783|R NA  
4360 PDYLQEYSTKYFY gj|3913590|sp|Q15303|E NA  
4361 MPTSVAYICSNQI gj|29427834|sp|Q8N4C8 NA  
4362 FGLQENYIKIVIN gj|37154888|sp|Q9Y5A7| NA  
4363 YAAVPLYRLYCQT gj|60416378|sp|Q9Y6N1| NA  
4364 HSKGRDYRDNTEL gj|119591435|gb|EAW71 NA  
4365 RPQVVEYCVVCGD gj|1351190|sp|P49116|T NA  
4366 HLRCYMYQARDLA gj|20137708|sp|O75923| NA  
4367 NSSQLLYQEYSDV gj|6094485|sp|Q12774|A [NSSQLLYQEYSDV|Y|1



|      |                |                         |                      |
|------|----------------|-------------------------|----------------------|
| 4368 | VDLLVKYAKIPAN  | gj 116283438 gb AAH20   | NA                   |
| 4369 | ASSNPVYMEMEKG  | gj 29429222 sp Q9UPZ3   | NA                   |
| 4370 | PTFGPCYLNLYGS  | gj 20139241 sp Q9NZM1   | NA                   |
| 4371 | FDNLELYGEAHEL  | gj 116242695 sp Q9HC1   | NA                   |
| 4372 | YGSTQDYLNPIIL  | gj 122066060 sp Q9NZJ   | NA                   |
| 4373 | SASSEDYIILPE   | gj 23503080 sp Q14596   | NA                   |
| 4374 | LLVLPYANLPSD   | gj 26006959 sp O60231   | NA                   |
| 4375 | YKGSLSYLNVTRK  | gj 115717 sp P07339 CA  | NA                   |
| 4376 | MLSIFSYPNPQEL  | gj 37537864 sp Q9UKA1   | NA                   |
| 4377 | GESFLGYVDM LGV | gj 116242733 sp P28070  | NA                   |
| 4378 | NKGNWCYINATLQ  | gj 2501458 sp Q14694 U  | NA                   |
| 4379 | SDICTIYLN LGDE | gj 71164791 sp Q14139   | NA                   |
| 4380 | SRPIRWYPNISTV  | gj 2506805 sp P24043 L  | NA                   |
| 4381 | KILCATYVNLNIR  | gj 472991 emb CAA8233   | NA                   |
| 4382 | LAEGSAYEEVPTS  | gj 130225 sp P19174 PL  | ([LAEGSAYEEVPTS Y 47 |
| 4383 | PDEYKGYEIEIFY  | gj 21431807 sp P24386 F | NA                   |
| 4384 | LFDDPSYVNVQNL  | gj 17380299 sp P29353   | ξ[LFDDPSYVNVQNL Y 4  |
| 4385 | QPPPPYPGPMEP   | gj 25091539 sp Q969T9   | NA                   |
| 4386 | QETEITYLIPWSK  | gj 17380145 sp Q9BS92   | NA                   |
| 4387 | KFCSREYLNPLHY  | gj 12643543 sp O14981   | NA                   |
| 4388 | PVCSRCYPNLAAY  | gj 14548316 sp O15015   | NA                   |
| 4389 | ATVRWDYQPDICK  | gj 51338806 sp Q8IZP6   | NA                   |
| 4390 | KHPNEEYANVGTG  | gj 85681862 sp Q9P243   | NA                   |
| 4391 | RVHCFHYLIPLAK  | gj 24418674 sp Q96A65   | NA                   |
| 4392 | FMVLFNYIIPVSM  | gj 85700404 sp P98196   | NA                   |
| 4393 | STTYPVYTESTDD  | gj 97535708 sp P25054   | NA                   |
| 4394 | VSRVEKYTISQEA  | gj 3023518 sp Q99426 T  | NA                   |
| 4395 | DYADFQYLKQVLG  | gj 116242733 sp P28070  | NA                   |
| 4396 | STLQSSYQIPTEN  | gj 148876773 sp Q14126  | NA                   |
| 4397 | IDKEYYYTKEEQF  | gj 55976470 sp Q7L5N1   | NA                   |
| 4398 | LGATCAYDAAKVL  | gj 34921882 sp Q8TEQ6   | NA                   |
| 4399 | F3:17          | control_spot            | NA                   |
| 4400 | F7:17          | control_spot            | NA                   |
| 4401 | pY             | control_spot            | NA                   |
| 4402 | IgM            | control_spot            | NA                   |
| 4403 | TAMRA          | control_spot            | NA                   |
| 4404 | pY             | control_spot            | NA                   |
| 4405 | IgM            | control_spot            | NA                   |
| 4406 | TAMRA          | control_spot            | NA                   |
| 4407 | VTQPPSYEDAVKQ  | gj 32363335 sp Q8IZQ8   | NA                   |
| 4408 | MAMGDAYVIVYSV  | gj 38258885 sp P55042   | NA                   |
| 4409 | GTRETEYWGHAVV  | gj 114386024 gb ABI742  | NA                   |
| 4410 | LGWKPKYGRFDVV  | gj 1352513 sp P35228 N  | NA                   |
| 4411 | RAEMEQYEIEVTV  | gj 119623002 gb EAX02   | NA                   |
| 4412 | VIDESIYFSSDVV  | gj 119632140 gb EAX11   | NA                   |
| 4413 | FETPEAYISLPKW  | gj 124106290 sp Q9Y4C   | NA                   |
| 4414 | GYPEGYYSSKSGW  | gj 73915357 sp O15027   | NA                   |
| 4415 | KMNDELYKEEKIW  | gj 120953300 ref NP_00  | NA                   |
| 4416 | NAVCCDYITEKFW  | gj 119583805 gb EAW63   | NA                   |
| 4417 | PYSSYGYEPMGGW  | gj 85681286 sp Q99218   | NA                   |
| 4418 | SQSSSIYHQNDIW  | gj 85700403 sp O75106   | NA                   |
| 4419 | LSAEPRYLVVYNP  | gj 146345453 sp Q16706  | NA                   |

|      |                |                            |
|------|----------------|----------------------------|
| 4420 | DIPTDQYESLKAQ  | gi 50400817 sp O94829 I NA |
| 4421 | GDEAGGYVKVYTG  | gi 74732360 sp Q96MF2 NA   |
| 4422 | CSSWPAYDQKEGY  | gi 19071816 dbj BAB856 NA  |
| 4423 | LHYPELYVLKGGY  | gi 50403734 sp P30304 I NA |
| 4424 | RFAEFQYLQPGPP  | gi 85701135 sp Q8N163  NA  |
| 4425 | GNVESVYVIDPED  | gi 143811381 sp P05108 NA  |
| 4426 | LGEDEYYQVVYYY  | gi 74751574 sp Q8WWF NA    |
| 4427 | VIAMYDYAANNED  | gi 20138768 sp Q9NZM3 NA   |
| 4428 | HYPDPGYSRHYED  | gi 14916543 sp O60716  NA  |
| 4429 | ERSEVDYGRRLSA  | gi 82592942 sp O60307 I NA |
| 4430 | SCPEHHYKQMEGD  | gi 116242809 sp Q8WXF NA   |
| 4431 | VTPTSDYYNPAAA  | gi 14249534 ref NP_116 NA  |
| 4432 | CGECGSYYNPHSD  | gi 74762517 sp Q8N2I2  NA  |
| 4433 | LDECEKYKTLGSD  | gi 46577503 sp Q8NB50  NA  |
| 4434 | IEFEVVYVAPEVD  | gi 74762751 sp Q9HD26 NA   |
| 4435 | QHSPSTYIDLAVD  | gi 50400889 sp Q6UWY NA    |
| 4436 | DFEENAYSYSASVD | gi 94730692 sp Q8N1W2 NA   |
| 4437 | CGEDIIMNENGE   | gi 76803797 sp Q99698 I NA |
| 4438 | EYFQPIVYVNPGE  | gi 22261808 sp Q13508 I NA |
| 4439 | LQPKDIYPYSDGE  | gi 71153524 sp Q9BQK8 NA   |
| 4440 | TVVESGYVRLLE   | gi 129890 sp P09619 PG NA  |
| 4441 | ITKEELYRMLAHE  | gi 34922029 sp Q96KC2  NA  |
| 4442 | SSTMSKYEYMEIE  | gi 1168947 sp Q09470 K NA  |
| 4443 | <<Marker>>     | contol_spot NA             |
| 4444 | FLGNDDYAVYVRE  | gi 118764251 gb AAI285 NA  |
| 4445 | NPEKEPYKSKYSA  | gi 73920081 sp Q96EK5  NA  |
| 4446 | LSDSSKYKISSSP  | gi 113412526 ref XP_94 NA  |
| 4447 | RLIYEDYVSILSP  | gi 1730186 sp P49795 R NA  |
| 4448 | IDNNTPYANSFTP  | gi 41016967 sp O43854 I NA |
| 4449 | AVFKDLYDKTSAH  | gi 56404568 sp Q7RTW NA    |
| 4450 | LCEGDMYNDYYVL  | gi 119570907 gb EAW50 NA   |
| 4451 | EAPGDEYLVSPIT  | gi 2498882 sp Q15459 S NA  |
| 4452 | LGDAPDYDRSQWL  | gi 67476963 sp P46439  NA  |
| 4453 | KGRPDLYTSTLIT  | gi 117144 sp P05177 CP NA  |
| 4454 | SRKEDFYTVETIT  | gi 119611102 gb EAW90 NA   |
| 4455 | CLSSLGYPHSTNKT | gi 38604894 sp Q8N2K0  NA  |
| 4456 | TCCFPSYVYPDPT  | gi 62899891 sp Q9HC77 NA   |
| 4457 | FCRNNGYAISTPT  | gi 548403 sp P12694 OD NA  |
| 4458 | TQSEQVYSFVTPT  | gi 118572690 sp P51805 NA  |
| 4459 | KKKKSNYANGLRT  | gi 113421425 ref XP_37 NA  |
| 4460 | PRAAGTGYASPDRT | gi 143682089 sp O4337 NA   |
| 4461 | SDRNPRYGNHVVL  | gi 3289980 gb AAC2561 NA   |
| 4462 | RGSTSAYTKSGYC  | gi 74735576 sp O95149  NA  |
| 4463 | KESEYHYEYACD   | gi 147647000 sp Q6UXG NA   |
| 4464 | <<Marker>>     | contol_spot NA             |
| 4465 | RRKEDNYDTHNCD  | gi 74743566 sp Q5SQS8 NA   |
| 4466 | DGAQDYYSYAYL   | gi 74727495 sp Q86UK7  NA  |
| 4467 | GWRQDTYCPMADV  | gi 74731207 sp Q96B77  NA  |
| 4468 | QEYKDAYSFADV   | gi 2554915 gb AAB8786 NA   |
| 4469 | DPWEPFYVAGGKV  | gi 23396461 sp O43505 I NA |
| 4470 | KTEPVDYEFKPIV  | gi 6166575 sp P37275 Z NA  |
| 4471 | NSAGDPYGNCGKV  | gi 20141191 sp O43184  NA  |

|                    |                            |
|--------------------|----------------------------|
| 4472 RPESPEYSGGNIV | gi 38258257 sp Q9NZV8 NA   |
| 4473 DAKECIYWQPGLP | gi 152969420 ref YP_001NA  |
| 4474 PPSDFYYINEYKP | gi 25091325 sp Q9H511 f NA |
| 4475 LEFSDYYLDSPDF | gi 21759325 sp O60890 c NA |
| 4476 VFANGDYEKAAEF | gi 18202494 sp Q13099 i NA |
| 4477 HVENDGYKTIYFF | gi 3024413 sp O15305 P NA  |
| 4478 KAFKPKYPICYFF | gi 8573114 gb AAF7722f NA  |
| 4479 PFSSADYWSNYEF | gi 146286062 sp O60293 NA  |
| 4480 VFGEPHYHTFDGF | gi 48428570 sp O75443  NA  |
| 4481 AYSPVDYMSITSF | gi 152031612 sp Q9UJ1z NA  |
| 4482 GNEWLGYDNTKSF | gi 109013506 ref XP_001NA  |
| 4483 VFSSSIYGMTGSF | gi 47606207 sp Q9BZD2 NA   |
| 4484 AGNNSLYRDTAVF | gi 543826 sp P02749 AP NA  |
| 4485 <<Marker>>    | control_spot NA            |
| 4486 HISEFLYDKALTF | gi 94710252 sp Q6P158  NA  |
| 4487 LPPEPDYSLLLTF | gi 266392 sp Q00978 IR1 NA |
| 4488 CVKHIIYVDNKAI | gi 13432172 sp O60488 v NA |
| 4489 LMTDEEYIINRAI | gi 60549585 gb AAX241c NA  |
| 4490 VKIKETYGDTEAI | gi 14286115 sp Q01814 v NA |
| 4491 FPKNSKYEYDPDI | gi 74732865 sp Q9BRD0 NA   |
| 4492 QLRCGPYLSSGDI | gi 14549162 sp Q12967 c NA |
| 4493 FSQELDYWGIDEI | gi 24418854 sp Q14721 i NA |
| 4494 FQGKSLYINSGNI | gi 20138032 sp Q9NPP4 NA   |
| 4495 MERDDIYVFEINI | gi 28381406 sp Q9Y4E8  NA  |
| 4496 FKEHSDYVRCGCA | gi 73920292 sp Q8TED0 NA   |
| 4497 YEEMPAYTHASPI | gi 74762083 sp Q9Y6R6  NA  |
| 4498 GYSNEWYLNRLRI | gi 38372640 sp Q8N127  NA  |
| 4499 CSCNAGYEERGFM | gi 116241351 sp P29320 NA  |
| 4500 SVNELIYKSGYGK | gi 4176369 gb AAD0884c NA  |
| 4501 YKGGDEYDNHCGK | gi 127293 sp P20645 MP NA  |
| 4502 IFENNIYYQPDIK | gi 67460566 sp Q8N608  NA  |
| 4503 YFGKGYTDCAIK  | gi 125987811 sp P12109 NA  |
| 4504 DKELDEYMHGGKK | gi 74752718 sp Q9H814  NA  |
| 4505 KKEDCKYIVVEKK | gi 131436 sp P08118 MS NA  |
| 4506 <<Marker>>    | control_spot NA            |
| 4507 SVPEDVYDKGCVK | gi 134047740 sp O00763 NA  |
| 4508 KSSNFGYITSCYK | gi 134034989 sp Q58A4f NA  |
| 4509 VPSCFVYEAVGYK | gi 24212024 sp Q9WVCz NA   |
| 4510 EDQEDIYFMKGAL | gi 19924283 sp O75185 v NA |
| 4511 LRKKPCYGTVAAL | gi 10439953 dbj BAB156 NA  |
| 4512 DLDNVRYTSLPAL | gi 119608269 gb EAW87 NA   |
| 4513 ALKENLYYEAGKM | gi 74738611 sp Q7L622 i NA |
| 4514 RMENPAYCLSAKL | gi 24418475 sp Q9BQ31  NA  |
| 4515 CCRQEMYIDLQGM | gi 13124811 sp O00292 i NA |
| 4516 LCTDDFYCTVNKL | gi 108935991 sp Q6UXV NA   |
| 4517 VKKEPRYWLLALL | gi 74749674 sp Q6ZUK4 NA   |
| 4518 CFSHPTYQSPDLL | gi 109940217 sp Q9UPS NA   |
| 4519 RSSEGFYPSQHM  | gi 3183518 sp Q05397 F NA  |
| 4520 VAKDPRYARYLKM | gi 6831732 sp Q9Y3C0 C NA  |
| 4521 IEPPTSIVSDGCA | gi 150403921 sp Q8IY17 NA  |
| 4522 AARKEDYLRHEIG | gi 8134736 sp P82094 TI NA |
| 4523 ANYELVYKDGEGH | gi 1709906 sp P23468 P NA  |

|                     |                                              |
|---------------------|----------------------------------------------|
| 4524 DNDWPIYVESEIG  | gj 46577502 sp Q8NAP8 NA                     |
| 4525 SCRSDDYMPMSPA  | gj 62298062 sp Q9Y4H2 [SCRSDDYMPMSPA Y 9     |
| 4526 SENFDDYMKALGV  | gj 127725 sp P02689 MY NA                    |
| 4527 <<Marker>>     | contol_spot NA                               |
| 4528 SIKMQQYTEHFMA  | gj 125333 sp P29317 EP [SIKMQQYTEHFMA Y 9    |
| 4529 CYLLIRYCSGKSK  | gj 77416855 sp P29033 C NA                   |
| 4530 SSDDVRYVNAFKF  | gj 143811474 sp P17948 [SSDDVRYVNAFKF Y 1    |
| 4531 TLQHPDYLQEYST  | gj 3913590 sp Q15303 E NA                    |
| 4532 AIKMGQYKESFAN  | gj 76803654 sp P29323 E [AIKMGQYKESFAN Y 9   |
| 4533 AIKMGRYKESFVS  | gj 76803655 sp P54753 E NA                   |
| 4534 FLYHEKYKVVELF  | gj 62512174 sp Q15546 I NA                   |
| 4535 FRHDSGYEVHHQK  | gj 112927 sp P05067 A4_ NA                   |
| 4536 GDKQVEYLDLDDL  | gj 90180201 sp Q13480 C [GDKQVEYLDLDDL Y 6   |
| 4537 GHGTVYIDPFTY   | gj 19860819 sp P54760 E NA                   |
| 4538 GLNKQGYKCRQCN  | gj 547803 sp Q05655 KP [GLNKQGYKCRQCN Y      |
| 4539 VYNQPVYNQPVGA  | gj 14548191 sp O15162 I [VYNQPVYNQPVGA Y 7   |
| 4540 FLKSPAYRDLAAQ  | gj 3914624 sp O15492 R [FLKSPAYRDLAAQ Y 17   |
| 4541 LLAKKGYQERDLE  | gj 3914240 sp O15547 P_ NA                   |
| 4542 DKDGNGYISAAEL  | gj 119609501 gb EAW89 [DKDGNGYISAAEL Y 10    |
| 4543 KNVVPLYDLLLEM  | gj 544257 sp P03372 ES [KNVVPLYDLLLEM Y 53   |
| 4544 GEPNVSYICSRYY  | gj 20455502 sp P49841 C [GEPNVSYICSRYY Y 27  |
| 4545 DGGDDIYEDIKIV  | gj 1718101 sp P52735 V, [DGGDDIYEDIKIV Y 172 |
| 4546 DTSSVLYTAVQPN  | gj 129890 sp P09619 PG [DTSSVLYTAVQPN Y 1C   |
| 4547 PPSAELYSNALPV  | gj 129890 sp P09619 PG [PPSAELYSNALPV Y 71   |
| 4548 <<Marker>>     | contol_spot NA                               |
| 4549 DISSNYMAPYDN   | gj 129890 sp P09619 PG [DISSNYMAPYDN Y 77    |
| 4550 DSEGHLTYVPIRE  | gj 13637934 sp Q03135 C [DSEGHLTYVPIRE Y 14  |
| 4551 SLNSNDYGYGGQK  | gj 116241370 sp Q96AE, [SLNSNDYGYGGQK Y E    |
| 4552 SSGEIVYCGQVFE  | gj 730538 sp Q02543 RL [SSGEIVYCGQVFE Y 6    |
| 4553 AGKALDYMLRNG   | gj 81175200 sp Q9Y490  NA                    |
| 4554 GSLAADYGFPDVG  | gj 24212077 sp Q08174 I NA                   |
| 4555 DDGRVSYPLCFIF  | gj 6831548 sp O60234 G [DDGRVSYPLCFIF Y 84   |
| 4556 FNVCNRYLVVLYY  | gj 12585536 sp Q9Y3B4  NA                    |
| 4557 TSSSAIYDNPNI   | gj 60389833 sp Q8IZD4 I [TSSSAIYDNPNI Y 191  |
| 4558 EFGGSIYQKVNEK  | gj 12643945 sp Q9Y277  NA                    |
| 4559 DLIHEIYTVGKRF  | gj 133021 sp P18124 RL [DLIHEIYTVGKRF Y 195  |
| 4560 LKYENDYPSVILR  | gj 119641 sp P14921 ET [LKYENDYPSVILR Y 20   |
| 4561 QPDYAMYSRISSS  | gj 32469765 sp Q92608 I [QPDYAMYSRISSS Y 21  |
| 4562 RVCEPCYEQLNRK  | gj 71152119 sp O14964 I [RVCEPCYEQLNRK Y 2   |
| 4563 EQERLAYINPDLA  | gj 400042 sp P31948 ST [EQERLAYINPDLA Y 35   |
| 4564 KTV CSTYLQSRYY | gj 61213741 sp Q9H422  [KTV CSTYLQSRYY Y 3E  |
| 4565 ADGGAEYATYQTK  | gj 27502427 ref NP_758 NA                    |
| 4566 PPSQGDYHGCPFR  | gj 51338777 sp P49643 F [PPSQGDYHGCPFR Y     |
| 4567 LMTGDTYTAHAGA  | gj 1168268 sp P42684 AI [LMTGDTYTAHAGA Y 3   |
| 4568 PKVKAIYDIERPD  | gj 56404432 sp O14639 , [PKVKAIYDIERPD Y 39E |
| 4569 <<Marker>>     | contol_spot NA                               |
| 4570 STPPSAYGSVKAY  | gj 113950 sp P07355 AN [STPPSAYGSVKAY Y 2    |
| 4571 RIPPYDDYPVVFLP | gj 73621365 sp Q5EBL8  [RIPPYDDYPVVFLP Y 10  |
| 4572 MGQKDSYVGDKAQ  | gj 126337369 ref XP_001 NA                   |
| 4573 FSRVQIYHNPTAN  | gj 1718079 sp P50552 V, [FSRVQIYHNPTAN Y 39  |
| 4574 NKLDTKYPYVCHA  | gj 23503055 sp P32321 I NA                   |
| 4575 ASDPILYRPVAVA  | gj 20178296 sp P14618 , [ASDPILYRPVAVA Y 10  |

|                    |                                            |
|--------------------|--------------------------------------------|
| 4576 PVSPSDYITYPSQ | gi 729995 sp P39678 MB NA                  |
| 4577 ENVEDVYANSLSP | gi 135077 sp P08153 SW NA                  |
| 4578 YTNEDGYDDAENA | gi 56757368 sp P07248  NA                  |
| 4579 TKENAEYERKTPG | gi 1711597 sp P46676 SI NA                 |
| 4580 KIDDFDYIGPDSL | gi 50400296 sp Q04052  NA                  |
| 4581 GLEALDYDIHNYF | gi 416737 sp P24813 YA NA                  |
| 4582 IGCEKTYKNQNGL | gi 417770 sp P32432 SF NA                  |
| 4583 SEEDDNYKPLDTS | gi 1351976 sp P05085 AI NA                 |
| 4584 ITTHPKYSDIDVD | gi 417456 sp P19880 YA NA                  |
| 4585 DSMLDDYVSSDLL | gi 462625 sp P33748 MS NA                  |
| 4586 NITVPDYSIIPTS | gi 88984445 sp P32389  NA                  |
| 4587 VPSLEEYSANPPN | gi 2507068 sp P22148 M NA                  |
| 4588 HQEFTDYDNPIFE | gi 62297871 sp Q61083 I NA                 |
| 4589 VISGEGYGRKADV | gi 2499640 sp Q99759 M NA                  |
| 4590 <<Marker>>    | contol_spot NA                             |
| 4591 AESDDTYKDDVNH | gi 2499638 sp Q62925 M NA                  |
| 4592 TSSSSEYGSVSPD | gi 6685617 sp Q99683 M NA                  |
| 4593 NVEEYSYKQEKKI | gi 6685621 sp Q9Y6R4 M NA                  |
| 4594 TNTENLYGTSPPS | gi 6685621 sp Q9Y6R4 M NA                  |
| 4595 MVEENPYRQLPCN | gi 55957234 emb CAI17 NA                   |
| 4596 TAKESQYVMKIAN | gi 3183087 sp Q99574 N NA                  |
| 4597 YFDRLDYVSMMCN | gi 20178314 sp O75306 I NA                 |
| 4598 AHEDPMYDIIRDN | gi 38372427 sp Q8TA86  NA                  |
| 4599 EISCDFYAWTSDN | gi 126302607 sp P01266 NA                  |
| 4600 GHDSYYARIGDN  | gi 91207950 sp Q9BZF9  NA                  |
| 4601 QGFQVEYKDFPKN | gi 90185286 sp O95793  NA                  |
| 4602 CFDETRYEYLEGG | gi 547643 sp Q04756 HC NA                  |
| 4603 DSKEGPYVSVPLN | gi 74753102 sp Q9P0V3  NA                  |
| 4604 LDGSREYVNVSQE | gi 14194891 sp O43561 I [LDGSREYVNVSQE Y 2 |
| 4605 LGADDSYYTARSA | gi 1177044 sp P43403 Z/[LGADDSYYTARSA Y 4  |
| 4606 LIKEDVYLSHDHN | gi 8928302 sp Q13882 P [LIKEDVYLSHDHN Y 34 |
| 4607 RGKSDPYAKVSIG | gi 119599471 gb EAW79 NA                   |
| 4608 TDNDDIYGAAWIG | gi 6226907 sp O75841 U NA                  |
| 4609 FPNSGKYATTARN | gi 12643337 sp Q9UPC5 NA                   |
| 4610 IKSNEGYSYGNRN | gi 51094655 gb EAL239 NA                   |
| 4611 LSEMVEYITHNRN | gi 116241235 sp Q13362 NA                  |
| 4612 QGRKLGTYFNNQN | gi 12643822 sp Q9NYC9 NA                   |
| 4613 ERENKSYISSLAP | gi 118572671 sp O60237 NA                  |
| 4614 IPSELGYGERGAP | gi 23503054 sp P26885 F NA                 |
| 4615 KHDCVGYVMKKAP | gi 38258924 sp P51784  NA                  |
| 4616 RQSPLTYEDHGAP | gi 12643957 sp Q9Y618  NA                  |
| 4617 TTNGEYIIAGAP  | gi 117949792 sp Q9UKZ NA                   |
| 4618 AYNPEPYLNNESQ | gi 109940053 sp O15013 NA                  |
| 4619 KTCKLIYDSMALG | gi 32172457 sp Q8TB24  NA                  |
| 4620 LRCDPDYLRGALG | gi 34921813 sp Q8IZR5  NA                  |
| 4621 QVRGDSYESGCLG | gi 12643476 sp P56557  NA                  |
| 4622 WKSWSYYSKALG  | gi 37090037 sp Q9Y4X1  NA                  |
| 4623 GAEEIYYKHVHCR | gi 38258636 sp Q96RJ0  NA                  |
| 4624 IFEELEYHEPVCR | gi 125950975 sp Q9Y4F NA                   |
| 4625 GGRERDYIAPWER | gi 74733529 sp Q9H0W NA                    |
| 4626 NFRSVYYEKVGF  | gi 37538019 sp Q9P0N9  NA                  |
| 4627 RRYEVEYLQFAFR | gi 47117913 sp Q9NU19 NA                   |

|      |               |                                             |
|------|---------------|---------------------------------------------|
| 4628 | AVCSGGYPDPPFR | gj 119619130 gb EAW98 NA                    |
| 4629 | FPHCEDYVASLGR | gj 119622317 gb EAX01 NA                    |
| 4630 | HVKEPRYLLMGGR | gj 23821814 sp Q9P2E3  NA                   |
| 4631 | APEDHRYITVSGC | gj 74747583 sp Q5VXU1 NA                    |
| 4632 | FSSEMEYNDFAIC | gj 61211648 sp Q8N6M6 NA                    |
| 4633 | HCWEESYEMNIGC | gj 62740001 gb AAH938 NA                    |
| 4634 | GKEWEEYVQIRTL | gj 74750394 sp Q86TU7  NA                   |
| 4635 | LIEKTLYHHVHGC | gj 109940166 sp P81133 NA                   |
| 4636 | SGRAEYYQWVGIC | gj 74752693 sp Q9H6D3  NA                   |
| 4637 | GGAELGYGCKASR | gj 74752228 sp Q9BPX1 NA                    |
| 4638 | AGPNFEYAEAPSR | gj 126314 sp P06858 LIP NA                  |
| 4639 | ERGRSYYVDHNSR | gj 32172435 sp P46934  NA                   |
| 4640 | SLREGHYAQRLSR | gj 55977069 sp P98176  NA                   |
| 4641 | ITRSERYVCAVTR | gj 74735248 sp Q9Y314  NA                   |
| 4642 | TKEMEPYMPYTR  | gj 74749827 sp Q75V66  NA                   |
| 4643 | DVSALIYASVGDP | gj 30046564 gb AAH504 NA                    |
| 4644 | HVFKEAYLGPADP | gj 119595124 gb EAW74 NA                    |
| 4645 | KLEEGKYLILKDP | gj 6685526 sp O15371 IF NA                  |
| 4646 | PFLKDVYVDSKDP | gj 30912745 sp Q9P032  NA                   |
| 4647 | VAATYKYVNMQDP | gj 2499325 sp O00217 N NA                   |
| 4648 | KMDGPGYGDEEEP | gj 119612288 gb EAW91 NA                    |
| 4649 | DPDSNPYSLLDTS | gj 90177782 sp P51116 F [DPDSNPYSLLDTS Y 52 |
| 4650 | HRSLEQYDQVLDG | gj 61223942 sp Q9UBC2 NA                    |
| 4651 | GMARDIYRASYYR | gj 146328566 sp Q9UM7 [GMARDIYRASYYR Y 1    |
| 4652 | VINPNAYDNLAII | gj 118572719 sp Q9H79 [VINPNAYDNLAII Y 632  |
| 4653 | LGETASYSLFLPT | gj 84029267 sp Q86SP6 [LGETASYSLFLPT Y 67   |
| 4654 | SKDSNPYATLPRA | gj 147644956 sp Q3V6T [SKDSNPYATLPRA Y 1    |
| 4655 | LNTPNTYLRVVA  | gj 543774 sp P35612 AD NA                   |
| 4656 | ICHDAEYVNVTAE | gj 148876773 sp Q1412 NA                    |
| 4657 | AEVRAQYEEIAQR | gj 82654947 sp P19013  NA                   |
| 4658 | LDPATRYPNLNL  | gj 45593495 sp Q8TDZ2  NA                   |
| 4659 | LEANKDYIIISWK | gj 1709202 sp P52179 M NA                   |
| 4660 | HADWKEYLNLLIC | gj 14195005 sp O60437 I NA                  |
| 4661 | DRGLSKYPNLLNQ | gj 1346694 sp P49354 P NA                   |
| 4662 | SRISGGYENVPTD | gj 62906878 sp O00469 I NA                  |
| 4663 | SIKIDPYINIDAG | gj 20981706 sp P17812 F NA                  |
| 4664 | ESFTEKYVNATPS | gj 17433306 sp Q9NY91  NA                   |
| 4665 | LHLRGGYIPIQE  | gj 267050 sp P14410 SU NA                   |
| 4666 | LFNLSTYLIPRHW | gj 1351188 sp P48775 T NA                   |
| 4667 | KGHDGLYQGLSTA | gj 23830999 sp P20963 C [KGHDGLYQGLSTA Y 1  |
| 4668 | PTCDEKYANITVD | gj 33112650 sp P08575 C NA                  |
| 4669 | AISIDRYTAVAMP | gj 118206 sp P14416 DR NA                   |
| 4670 | CLRVELYGCLWRD | gj 729008 sp Q08345 DD NA                   |
| 4671 | VREITGYLNIQSW | gj 119534 sp P21860 ER NA                   |
| 4672 | TVTTISYLNLAVA | gj 120427 sp P21462 FPI NA                  |
| 4673 | HKEGPNYQWMPFS | gj 8134696 sp Q13275 S NA                   |
| 4674 | PKPGDDYSYNQFS | gj 2498802 sp Q92733 P NA                   |
| 4675 | VLCTEYSRWAGS  | gj 34922606 sp Q96CW NA                     |
| 4676 | CQSEDWYKNQLGS | gj 116242861 sp Q96ND NA                    |
| 4677 | DSPDDDYHALFVL | gj 125950459 sp Q2KHT NA                    |
| 4678 | IAPQTKYIIPGGS | gj 148226485 ref NP_96 NA                   |
| 4679 | DKEEIKYLNIIIS | gj 116241294 sp O15078 NA                   |

|      |                |                                              |
|------|----------------|----------------------------------------------|
| 4680 | HFFCDLYALMKIS  | gi 85681882 sp Q15612 NA                     |
| 4681 | PADDELYQRTRIS  | gi 74733183 sp Q9BU61 NA                     |
| 4682 | SLQGVRYVDGGIS  | gi 74731110 sp Q96AD5 NA                     |
| 4683 | DGEETSYCFKEKS  | gi 2495290 sp Q15475 S NA                    |
| 4684 | LLCMEEYVIEPKS  | gi 74751888 sp Q96GM8 NA                     |
| 4685 | GTHEVRYVSAGQS  | gi 27734555 sp Q96BD0 NA                     |
| 4686 | PWVEPGYWESWPS  | gi 74761282 sp Q9BV99 NA                     |
| 4687 | LFQEFDYQPIAAA  | gi 121958055 sp Q3MIX3 NA                    |
| 4688 | GMNMEPYGFHARG  | gi 94730396 sp Q10571 I NA                   |
| 4689 | SWAETTYWIS PQG | gi 2494720 sp Q14627 I1 NA                   |
| 4690 | CKEMSCYSDFPFP  | gi 399505 sp Q01740 FM NA                    |
| 4691 | FVKNTHYYDKRWS  | gi 74752540 sp Q9GZU3 NA                     |
| 4692 | DHCEALYKEVQRC  | gi 38372396 sp Q9UG22 NA                     |
| 4693 | FCSSVIYVIFGSC  | gi 119624269 gb EAX038 NA                    |
| 4694 | LTEKKEYDEKNSC  | gi 128485546 ref NP_007 NA                   |
| 4695 | VNPMESYQNRQSC  | gi 23396507 sp Q9BQT9 NA                     |
| 4696 | KHSM LVYVAKGRG | gi 148685156 gb EDL171 NA                    |
| 4697 | CRSCRTYINPFVS  | gi 13124510 sp O95487 S NA                   |
| 4698 | EWYRFHYINILSR  | gi 585966 sp P37088 SC NA                    |
| 4699 | QLSDPDYINQYVI  | gi 24418867 sp Q9Y5W8 NA                     |
| 4700 | IGVRESYVNLCSN  | gi 14917099 sp Q93034 NA                     |
| 4701 | WIEDTLYANVDFE  | gi 6707663 sp P78363 AI NA                   |
| 4702 | BMADPKYADLPGI  | gi 22096346 sp Q13561 I NA                   |
| 4703 | ILQGLKYTFSDW   | gi 547803 sp Q05655 KP NA                    |
| 4704 | MDEELHYASLNFH  | gi 116241290 sp P20138 [MDEELHYASLNFH Y 34   |
| 4705 | QFEYAAAYIIHAYK | gi 20140422 sp O15455  [QFEYAAAYIIHAYK Y 759 |
| 4706 | SQEELHYATLNFP  | gi 118572721 sp Q96LC7 [SQEELHYATLNFP Y 66   |
| 4707 | TVVIALYDYQTND  | gi 585361 sp Q08881 ITk [TVVIALYDYQTND Y 18  |
| 4708 | YSTKYFYKQNGRI  | gi 3913590 sp Q15303 E NA                    |
| 4709 | LDSGGFYITSRTQ  | gi 125711 sp P12931 SR [LDSGGFYITSRTQ Y 21   |
| 4710 | RLQNFSYDQREMI  | gi 30173387 sp Q9NTZ6  [RLQNFSYDQREMI Y 52   |
| 4711 | TLSEVDYAPAGPA  | gi 119595261 gb EAW74 [TLSEVDYAPAGPA Y 11    |
| 4712 | AYGERPYWNMTNR  | gi 19857975 sp P29322 E [AYGERPYWNMTNR Y     |
| 4713 | SLDNPDYQQDFFP  | gi 2811086 sp P00533 E ( [SLDNPDYQQDFFP Y 1  |
| 4714 | EELGYEYMDVGSD  | gi 119534 sp P21860 ER NA                    |
| 4715 | PGLEYCYNPSHNP  | gi 120046 sp P11362 FG [PGLEYCYNPSHNP Y 5    |
| 4716 | QAHYNMYPQNPDS  | gi 41019536 sp P51692 S [QAHYNMYPQNPDS Y 7   |
| 4717 | RGQEGEYAVPFDA  | gi 143220234 sp O60496 [RGQEGEYAVPFDA Y 2    |
| 4718 | SVNKL VYENINGL | gi 71152057 sp Q8WU2C NA                     |
| 4719 | YRSPPPYVPP     | gi 2498284 sp Q14118 D [YRSPPPYVPP Y 892 Q   |
| 4720 | DPPPELYFVKVDV  | gi 6226780 sp O14746 TI [DPPPELYFVKVDV Y 7C  |
| 4721 | SEPVGIYQGFEEK  | gi 547803 sp Q05655 KP [SEPVGIYQGFEEK Y 31   |
| 4722 | STDRSPYEKVSAG  | gi 547937 sp P15941 MU [STDRSPYEKVSAG Y 1:   |
| 4723 | TFTNITYRGT     | gi 125987835 sp P05106 [TFTNITYRGT Y 785 P0: |
| 4724 | TSSGEWYQNFQPP  | gi 13637684 sp P30203 C [TSSGEWYQNFQPP Y 6   |
| 4725 | VGDEDIYSGLSAQ  | gi 13124807 sp P15498 \ [VGDEDIYSGLSAQ Y 14  |
| 4726 | ATYAEPYRPIQYR  | gi 20139104 sp Q99569 I [ATYAEPYRPIQYR Y 48  |
| 4727 | RLYAESYERDPSG  | gi 152031655 sp Q15124 NA                    |
| 4728 | TEEKFRYMCILSG  | gi 85700954 sp Q9UQ84 NA                     |
| 4729 | DGRKNLYTAMPLP  | gi 38372888 sp Q9UKV8 NA                     |
| 4730 | LTYGNRYKNVKLP  | gi 116242483 sp P11413 NA                    |
| 4731 | ACEDLKYGDQSKV  | gi 8475983 sp O75916 R NA                    |

|      |                |                                             |
|------|----------------|---------------------------------------------|
| 4732 | KLSEDPYGIFCLV  | gi 74753527 sp Q9Y6V7  NA                   |
| 4733 | SHSEQEYKAGGS   | gi 41016969 sp O95208 I NA                  |
| 4734 | QCEQAVYQTILEE  | gi 150421536 sp O75553 NA                   |
| 4735 | PQQPLAYPKLQRQ  | gi 50400978 sp Q7Z5J4 I NA                  |
| 4736 | LAVMGAYVLLKRE  | gi 17368701 sp Q9BY50  NA                   |
| 4737 | PNEFDKYRMFIGD  | gi 74716122 sp Q8TF72  NA                   |
| 4738 | WEHGDGYPFDGKD  | gi 116856 sp P08253 MM NA                   |
| 4739 | ALEQDTYWRELSC  | gi 51338794 sp P78559 I NA                  |
| 4740 | IQSHCSYTYGRKG  | gi 14548118 sp Q13459 I NA                  |
| 4741 | TRDLAQYDAAHHE  | gi 90110780 sp Q02818 I NA                  |
| 4742 | PEEESAYVAGEKR  | gi 41017512 sp Q9UNZ2 NA                    |
| 4743 | HYTHSDYQYSQRS  | gi 20139105 sp Q99959 I NA                  |
| 4744 | KNETSKYAEYSFT  | gi 68565701 sp Q5UIP0 I NA                  |
| 4745 | RQETFVYEMESHA  | gi 8134719 sp Q92966 S NA                   |
| 4746 | RIGAFGYMECSAK  | gi 47606458 sp P61586 F NA                  |
| 4747 | LKRHGKYCHLRGG  | gi 20454955 sp Q14526 I NA                  |
| 4748 | DYINANYIRGYDG  | gi 20141721 sp P35236 F NA                  |
| 4749 | GPLSSYGVPAASL  | gi 38257363 sp O75369 I NA                  |
| 4750 | KLGEPTYATVFKG  | gi 116242704 sp Q07002 NA                   |
| 4751 | EQTQKIYNCHVLL  | gi 51704324 sp Q86X76  NA                   |
| 4752 | PPLPSQYAQPSQP  | gi 85700443 sp Q07157 ; [PPLPSQYAQPSQP Y 1. |
| 4753 | SDFETVYQQCVRC  | gi 1709543 sp P24666 PI NA                  |
| 4754 | ERRKSRYSDDLDFE | gi 12643618 sp O60242 I NA                  |
| 4755 | SREQTVYYAKAFS  | gi 29840827 sp O75439 I NA                  |
| 4756 | SENEDIYYKSMFN  | gi 46576868 sp O95490 I NA                  |
| 4757 | SEGPSNYDSYKKV  | gi 30913162 sp Q8TEWC NA                    |
| 4758 | RRTLRYVNLTSL   | gi 38503351 sp Q8N1M1 NA                    |
| 4759 | VAHQPPYTQPHCS  | gi 116242614 sp Q96RT NA                    |
| 4760 | GDSKVIYMARNPK  | gi 22096149 sp Q9BR01  NA                   |
| 4761 | YTLFAYFSSRKR   | gi 34098662 sp Q92576 I NA                  |
| 4762 | KVSQDYEIEISD   | gi 127566 sp P20591 MX NA                   |
| 4763 | PIAMEYYNWGRFS  | gi 74752543 sp Q9GZY6 NA                    |
| 4764 | SNGLLSYRSKAE   | gi 129308 sp P22059 OS NA                   |
| 4765 | YQNQGIYQVPTGH  | gi 8134360 sp Q14511 C NA                   |
| 4766 | KTVHEKYQQQAPS  | gi 56405328 sp P29597 I NA                  |
| 4767 | YKSNEDYVYVRGR  | gi 83305815 sp P31629 z NA                  |
| 4768 | GYGSGRYYDSRPG  | gi 1710620 sp P98179 RI NA                  |
| 4769 | NLTQLRYLNLSSST | gi 20140873 sp Q9NR97 NA                    |
| 4770 | RWDPADYENVTSI  | gi 1351848 sp P43681 A NA                   |
| 4771 | LPHGFCYIIPSNL  | gi 2833247 sp Q13797 IT NA                  |
| 4772 | AYKIFLYPNAGQL  | gi 119628734 gb EAX08 NA                    |
| 4773 | SQFNTLYLRVRGD  | gi 21542405 sp Q9Y375  NA                   |
| 4774 | ALPRLIYLNLSNN  | gi 2498405 sp Q14392 LI NA                  |
| 4775 | LDLTYIYPNIIAM  | gi 42560209 sp P60484 F NA                  |
| 4776 | NIPGSDYINANYI  | gi 131469 sp P29350 PTI NA                  |
| 4777 | LGDEGGYINASFI  | gi 12643716 sp Q12923 I NA                  |
| 4778 | ENIKGYYIIIVPL  | gi 1709906 sp P23468 P NA                   |
| 4779 | DSKHSDYINANYV  | gi 143811444 sp P23470 NA                   |
| 4780 | DGKLTDYINANYV  | gi 400199 sp P23471 PTI NA                  |
| 4781 | IDEEDTYTMPSTR  | gi 3183518 sp Q05397 F, [IDEEDTYTMPSTR Y 40 |
| 4782 | EMLEGFYEEISKG  | gi 62512187 sp Q9Y613  NA                   |
| 4783 | PEPENDYEDVEEM  | gi 123557 sp P14317 HC [PEPENDYEDVEEM Y 3   |



4784 VASIEEYTEMMPA gi|547738|sp|P35568|IR\$ NA  
4785 PAAPVSYADMRTG gi|547738|sp|P35568|IR\$ NA  
4786 MADDEDYEEVVEY gi|19856971|sp|P20929|† NA  
4787 REKDEIYGHPLFP gi|59803105|sp|Q99687|I NA  
4788 SSQARKYVNAFSA gi|2815504|sp|P10242|M NA  
4789 KKEYPLYINQTCH gi|116242679|sp|Q13287 NA  
4790 LKGIGEYVNIRTG gi|85700389|sp|Q92620|I NA  
4791 KEETLAYLNIVSP gi|17380293|sp|Q9UBS8 NA  
4792 RKQLVIYEEISDP gi|115502458|sp|O60225 NA  
4793 GAKEITYGNNKPV gi|115502349|sp|P10323 NA  
4794 PNQTRTYDPEGFK gi|68565913|sp|Q8NFP7 NA  
4795 AEPEDHYFLLTEP gi|47117647|sp|P61158|/ NA  
4796 QREQRSYVDLLVK gi|116283438|gb|AAH20\$ NA  
4797 QQGDFGYCPRVYC gi|54037520|sp|P67870|C NA  
4798 SVAGVRYFQCEPL gi|266902|sp|P30622|CL NA  
4799 IVGNEYFRVYTE gi|6093456|sp|Q14324|M NA  
4800 DHLEGLYAKVNKP gi|30913163|sp|Q8TEW\$ NA  
4801 LSVMPQYEDILQV gi|134035014|sp|Q9P227 NA  
4802 VKDWDKYGLMPQV gi|145559531|sp|Q8WW NA  
4803 ILSKVAYVLMASV gi|37081373|sp|Q8NGS6 NA  
4804 DLEPDTYCRYDSV gi|6919941|sp|Q15113|P NA  
4805 ILPNPLYHCLGSV gi|156151445|ref|NP\_07\$ NA  
4806 SAPEWPYMLVGSV gi|12643301|sp|O95342|, NA  
4807 FPPCEEYLQGGYL gi|20141491|sp|P09016|† NA  
4808 KTSAPYDSADDW gi|117949358|sp|Q9BTA\$ NA  
4809 GTTSTSYKSLANQ gi|28202103|sp|Q9C0B5| NA  
4810 HLRKDPYANLMLQ gi|119594256|gb|EAW73 NA  
4811 VVFLPAYENPPAW gi|73621365|sp|Q5EBL8|[VVFLPAYENPPAW|Y|1;  
4812 DCAENMYIDMMLW gi|66347357|emb|CAI95( NA  
4813 NQDNCPYISNANQ gi|549136|sp|P35442|TS| NA  
4814 GYDDL DYGMMSDY gi|14916543|sp|O60716|( NA  
4815 PFCAEDYTESLLQ gi|74735407|sp|O43663|I NA  
4816 VKEDVCYVSQDFY gi|27923737|sp|Q9GZN1 NA  
4817 FLNLDYVAVYLP gi|148612805|ref|NP\_05\$ NA  
4818 LHNVELYEDNHMP gi|116241243|sp|Q13023 NA  
4819 AGPSPVYVKVSA gi|55665713|emb|CAH71 NA  
4820 NYETVKYFNNERY gi|8928549|sp|O75027|A NA  
4821 VRTDVQYKNNKSY gi|34534113|dbj|BAC869 NA  
4822 EEEVAYISLYSY gi|116241332|sp|Q9BTC NA  
4823 CSSKEEYQKESSA gi|50401059|sp|Q8IZK6|† NA  
4824 DGCPPKYAKTLYL gi|25091548|sp|Q9HCS7 NA  
4825 HYGKDAYRSGGPD gi|67550215|gb|AAY684\$ NA  
4826 SDTKKSYVNGGFA gi|1352332|sp|P43005|E, NA  
4827 ARMREDYDSVEQD gi|10720244|sp|Q9Y5S9| NA  
4828 ECSEEDYRPSQQD gi|125987835|sp|P05106 NA  
4829 PAGDDGYSGANQD gi|74762240|sp|Q5T619|, NA  
4830 HLTEKAYS DTPRD gi|119583324|gb|EAW62 NA  
4831 RESEGLYGQPGDE gi|39932727|sp|Q15057|( [RESEGLYGQPGDE|Y|7  
4832 EGYKKKYQQVDEE gi|129890|sp|P09619|PG NA  
4833 NLKMEAYVPSEEE gi|87299628|ref|NP\_683( NA  
4834 GGDMFDYIMKHEE gi|90185235|sp|Q9NRH2 NA  
4835 LAAMEGYIGVDFE gi|12643641|sp|O75899|( NA

|      |               |                        |                     |
|------|---------------|------------------------|---------------------|
| 4836 | QKAETLYTMGDFE | gi 145572736 sp Q96NG  | NA                  |
| 4837 | QAAEVTYGAMAHA | gi 89039216 ref XP_942 | NA                  |
| 4838 | DDYDLMYVNLDNE | gi 1346908 sp P26022 P | NA                  |
| 4839 | LSRAELYKEPTNE | gi 62900709 sp Q9H6R4  | NA                  |
| 4840 | FLTDQSYIDVLP  | gi 125484 sp P08581 ME | NA                  |
| 4841 | EDSSSLYEEGNQE | gi 74728222 sp Q8IXQ4  | NA                  |
| 4842 | RRLCDDYDEAARE | gi 24418474 sp Q96KK3  | NA                  |
| 4843 | <<Marker>>    | contol_spot            | NA                  |
| 4844 | SQESGYDRMDYE  | gi 12643409 sp P43243  | NA                  |
| 4845 | YRDGEEYEWKETA | gi 74721539 sp Q9Y6M7  | NA                  |
| 4846 | RGKEVCYERLGCF | gi 121948240 sp Q17RR  | NA                  |
| 4847 | YAEEMEYRPHPAF | gi 51702249 sp P62955  | NA                  |
| 4848 | CVDNSEYMRNGDF | gi 1709796 sp P55036 P | NA                  |
| 4849 | KGPVEGYEENEFF | gi 47606219 sp Q9UI30  | NA                  |
| 4850 | NWRDDQYLDDCKP | gi 28558814 sp Q93074  | NA                  |
| 4851 | PEDMPSYGVYPWL | gi 2499917 sp P78562 P | NA                  |
| 4852 | PIYEGDYHPEPLT | gi 148664213 ref NP_00 | NA                  |
| 4853 | DLNTTEYVVGAPT | gi 124951 sp P08514 IT | NA                  |
| 4854 | GARKPHYDIWGNT | gi 118572618 sp O6026  | NA                  |
| 4855 | LHSDIRYESMINT | gi 147742985 sp Q5TH6  | NA                  |
| 4856 | ATPELQYKDKLDA | gi 47116570 sp Q96RP7  | NA                  |
| 4857 | DDSEIAYKYAQLA | gi 77540235 gb ABA869  | NA                  |
| 4858 | PDWKDFYVVEPLA | gi 123079 sp P06865 HE | NA                  |
| 4859 | ASVKDGYAVRAAD | gi 13431554 sp Q9NQX3  | NA                  |
| 4860 | GRPGACYVDIPAD | gi 20455027 sp Q9UJ83  | NA                  |
| 4861 | ATSPGQYVLSGLQ | gi 44680159 ref NP_976 | NA                  |
| 4862 | PRNNSPYEIENG  | gi 1706799 sp P02671 F | NA                  |
| 4863 | ATERADYVALAIV | gi 114152771 sp O0046  | NA                  |
| 4864 | <<Marker>>    | contol_spot            | NA                  |
| 4865 | HSVETVYKDLCLQ | gi 118573898 sp Q6PIF2 | NA                  |
| 4866 | LNSPDPYEKIPHV | gi 23503045 sp O95180  | NA                  |
| 4867 | QNSVPHYAEADIV | gi 729008 sp Q08345 D  | NA                  |
| 4868 | PDFIDGYINLAAA | gi 68067509 sp O15294  | NA                  |
| 4869 | PFIDLNYMVYMFQ | gi 120649 sp P04406 G3 | NA                  |
| 4870 | QYAGYDYSQQGRF | gi 74760683 sp Q969M3  | [QYAGYDYSQQGRF Y    |
| 4871 | SLPNPEYYTLRYA | gi 30913107 sp Q96JJ3  | [SLPNPEYYTLRYA Y 48 |
| 4872 | DADDAVYELNGKD | gi 20981726 sp Q08170  | [DADDAVYELNGKD Y 5  |
| 4873 | NIVFGDYTWTEFD | gi 85541056 sp Q15645  | [NIVFGDYTWTEFD Y 5  |
| 4874 | GWPSAYGVTKIG  | gi 118519 sp P16152 D  | NA                  |
| 4875 | PSKSTVYVSNLPF | gi 74760425 sp Q8TBF4  | NA                  |
| 4876 | DAYKDKYVCFDQF | gi 128997 sp P25929 N  | NA                  |
| 4877 | LLSKGSYQTSHQF | gi 114520607 ref NP_94 | NA                  |
| 4878 | FISSFQYLIVAIA | gi 30316388 sp Q9H7F0  | NA                  |
| 4879 | SSNLPKYCDNCSF | gi 119628762 gb EAX08  | NA                  |
| 4880 | FPEMELYGEHAKA | gi 148699332 gb EDL31  | NA                  |
| 4881 | LGEDSDYDKLSDM | gi 89026785 ref XP_940 | NA                  |
| 4882 | KGFTPYARLGPH  | gi 20141580 sp Q02978  | NA                  |
| 4883 | AGREWYYGNVTRH | gi 20532395 sp O43639  | NA                  |
| 4884 | LCEWTDYGNTFSH | gi 74758336 sp Q6PG37  | NA                  |
| 4885 | <<Marker>>    | contol_spot            | NA                  |
| 4886 | CRNKDHYGIMMYH | gi 108935853 sp Q1414  | NA                  |
| 4887 | LPEKVEYVIKCDM | gi 116242792 sp P5153  | NA                  |

|                    |                                             |
|--------------------|---------------------------------------------|
| 4888 YLAEAGYTSRGKI | gi 3023637 sp Q14562 D NA                   |
| 4889 LTTIELIYVRKLI | gi 119609213 gb EAW88 NA                    |
| 4890 IGKGEYADLEYA  | gi 119615827 gb EAW95 NA                    |
| 4891 VLEEGHYPCLSAM | gi 76800646 sp Q9Y4K1  NA                   |
| 4892 DQEGSTYEQIPAC | gi 89039180 ref XP_9421 NA                  |
| 4893 TPSPVEYHSPGLI | gi 32469743 sp Q8N1I0  NA                   |
| 4894 FPSEDFYRCGYCK | gi 22002033 sp O95260  NA                   |
| 4895 HTSMFIYKWPADK | gi 18203633 sp Q9Y5L3  NA                   |
| 4896 CFDATLYIQMNEK | gi 20138891 sp O75925  NA                   |
| 4897 QTSEKKYHFGCEK | gi 2501464 sp O00507 U NA                   |
| 4898 GDSPGRYEIMNFK | gi 1709020 sp P41594 M NA                   |
| 4899 LGSASDYIQSVFK | gi 119620108 gb EAW99 NA                    |
| 4900 HVFEDSYRELHRK | gi 73915353 sp Q7Z6Z7  NA                   |
| 4901 KTADPRYELPSRK | gi 41018380 sp O96006  NA                   |
| 4902 LFHNPEYKNTSK  | gi 6166019 sp P20273 C NA                   |
| 4903 DNRAFGYVCGGEG | gi 145559465 sp P98082 NA                   |
| 4904 SRVNSDYETDGEG | gi 12230848 sp O95049  NA                   |
| 4905 LNHKNSYVIKTTK | gi 55662050 emb CAH73 NA                    |
| 4906 <<Marker>>    | control_spot NA                             |
| 4907 LLLKELYVENAHL | gi 118601093 sp Q9Y2I6 NA                   |
| 4908 ADENHLYEDLFRA | gi 746415 gb AAA85819. NA                   |
| 4909 VTQKADYPNIQHL | gi 6226957 sp Q13635 P NA                   |
| 4910 LLCESRYNESDKQ | gi 73921624 sp Q86U86  NA                   |
| 4911 FACKLDYDEDSA  | gi 74762570 sp Q8NFI4  NA                   |
| 4912 ECKQDEYAKSMIL | gi 74745673 sp Q5T9G4  NA                   |
| 4913 QCSVDVYKKGSL  | gi 17375490 sp Q14203  NA                   |
| 4914 AVPEEIYRYSRSL | gi 50400856 sp Q14160  NA                   |
| 4915 HKKRPSYVVPTSL | gi 116242837 sp Q9Y2K NA                    |
| 4916 KESSGKYTFSAHM | gi 3914237 sp Q15363 T NA                   |
| 4917 LSASTDYEQSTGM | gi 74732111 sp Q96IW7  NA                   |
| 4918 QNQWPNYEEKPHM | gi 12644018 sp P55196  NA                   |
| 4919 PSSRGDYMTMQMS | gi 547738 sp P35568 IR NA                   |
| 4920 QGDLKLYSLEGYG | gi 3183117 sp Q15118 P NA                   |
| 4921 QYFMTEYVATRWW | gi 2499599 sp Q13164 M [QYFMTEYVATRWW Y 2   |
| 4922 RHVSISYDIPPTP | gi 90180201 sp Q13480  [RHVSISYDIPPTP Y 307 |
| 4923 RKFQDDYQVVTTT | gi 1352482 sp P48549 IR NA                  |
| 4924 RSSLKAYGNGYSS | gi 114765 sp P07550 AD NA                   |
| 4925 DLFPMDYHCLGDN | gi 1710811 sp P34925 R NA                   |
| 4926 DVYETDYRKGK   | gi 12644000 sp P14616  NA                   |
| 4927 <<Marker>>    | control_spot NA                             |
| 4928 EATATDYHTTSHP | gi 114787 sp P02730 B3 [EATATDYHTTSHP Y 46  |
| 4929 EEKGGLYIVTEYM | gi 729887 sp P41240 CS NA                   |
| 4930 EIYSADYRVQSK  | gi 118572711 sp Q01973 NA                   |
| 4931 EPKKKKYAKEAWP | gi 19863082 sp Q12972 I [EPKKKKYAKEAWP Y 3  |
| 4932 DRKGGYSQAASS  | gi 147744695 gb ABQ51 [DRKGGYSQAASS Y 3     |
| 4933 FLPVPEYINQSVP | gi 2811086 sp P00533 E [FLPVPEYINQSVP Y 10  |
| 4934 EHAQDTYLVLDKW | gi 119524 sp P19235 EP [EHAQDTYLVLDKW Y 3   |
| 4935 TAENPEYLGLDVP | gi 119533 sp P04626 ER [TAENPEYLGLDVP Y 12  |
| 4936 LIEDNEYTARQGA | gi 125870 sp P07947 YE [LIEDNEYTARQGA Y 41  |
| 4937 IHLEKKYVRRDSG | gi 547770 sp P07333 CS [IHLEKKYVRRDSG Y 70  |
| 4938 NPQEGLYNELQKD | gi 23830999 sp P20963  [NPQEGLYNELQKD Y 1   |
| 4939 KIGEGTYGVVYKA | gi 119609759 gb EAW89 [KIGEGTYGVVYKA Y 15   |

|      |                |                                             |
|------|----------------|---------------------------------------------|
| 4940 | HFPQFSYSASSTA  | gj 18027298 gb AAL5573 NA                   |
| 4941 | GPKGTYIKTELI   | gj 2507413 sp P42224 S` [GPKGTYIKTELI Y 701 |
| 4942 | PMDTSVYESPYSD  | gj 1177044 sp P43403 Z/ [PMDTSVYESPYSD Y 3  |
| 4943 | GEEEHVYSFPNKQ  | gj 27735219 sp P49023 F [GEEEHVYSFPNKQ Y 1  |
| 4944 | TWDNEAYVHDAPV  | gj 62906858 sp P01584 I NA                  |
| 4945 | RHRMPGYETMKNK  | gj 2499640 sp Q99759 M NA                   |
| 4946 | KGNEPEYEGDDTE  | gj 6685621 sp Q9Y6R4 M NA                   |
| 4947 | NWEPLYDSVGNH   | gj 1710804 sp P38165 R` NA                  |
| 4948 | <<Marker>>     | contol_spot NA                              |
| 4949 | NFYSPYENLPKP   | gj 586313 sp P38128 SM NA                   |
| 4950 | KGENRGYEFVKDS  | gj 417110 sp P25364 HC NA                   |
| 4951 | HTGEKPYTCPDCG  | gj 74757437 sp Q6DD87 NA                    |
| 4952 | APVGSVYQKTNAV  | gj 51316115 sp Q9UJU6 [APVGSVYQKTNAV Y 11   |
| 4953 | NYDGKEYDPVEAR  | gj 60390165 sp Q15555 I [NYDGKEYDPVEAR Y 1  |
| 4954 | VPKEDIYSGGGGG  | gj 8134660 sp Q13151 R [VPKEDIYSGGGGG Y 11  |
| 4955 | TGFLTEYVATRWWY | gj 232066 sp P27361 MK [TGFLTEYVATRWWY Y 11 |
| 4956 | HEGETAYIRVKVD  | gj 730773 sp Q07955 SF NA                   |
| 4957 | ITDESPYVHYLNT  | gj 12643898 sp Q9ULV4 NA                    |
| 4958 | DEEEDYSGGLC    | gj 3024632 sp Q99747 S [DEEEDYSGGLC Y 30    |
| 4959 | NMSGSLYEMVSRV  | gj 730840 sp Q08945 SS NA                   |
| 4960 | NDSPTYGQQGHP   | gj 74751663 sp Q93052 I [NDSPTYGQQGHP Y 3   |
| 4961 | NRKSDIYVCMISY  | gj 1707886 sp P31150 G NA                   |
| 4962 | KGYPGDYTKGVEI  | gj 131616 sp P22102 PU NA                   |
| 4963 | GTAEPDYGALYEG  | gj 130225 sp P19174 PL ([GTAEPDYGALYEG Y 7  |
| 4964 | TKHLSPYATLTVG  | gj 74733019 sp Q9BSJ8 [TKHLSPYATLTVG Y 82   |
| 4965 | DADEFGYSR      | gj 60415926 sp Q7KZF4 [DADEFGYSR Y 908 Q7   |
| 4966 | RDPPDPYVSLLLL  | gj 74733019 sp Q9BSJ8 [RDPPDPYVSLLLL Y 10   |
| 4967 | PDTEEIYKLTGTG  | gj 122889176 emb CAI39 NA                   |
| 4968 | RGADSAYYQVGQT  | gj 47117931 sp Q9Y2I7 F [RGADSAYYQVGQT Y 1  |
| 4969 | <<Marker>>     | contol_spot NA                              |
| 4970 | VATKPLYVALAQR  | gj 3183544 sp P11940 P/ [VATKPLYVALAQR Y 36 |
| 4971 | HTGENLYKCKVCA  | gj 20141959 sp Q14586 ; [HTGENLYKCKVCA Y 5  |
| 4972 | IPSAPLYEEITYS  | gj 110810435 sp O60291 [IPSAPLYEEITYS Y 389 |
| 4973 | LYEEITYSGISDG  | gj 110810435 sp O60291 [LYEEITYSGISDG Y 394 |
| 4974 | FPIPEEYTFIQNV  | gj 126302554 sp Q00839 [FPIPEEYTFIQNV Y 472 |
| 4975 | ETQKSIYYITGES  | gj 17865718 sp P08238 f NA                  |
| 4976 | SHANSSYYDNLLL  | gj 465688 sp P34233 AS NA                   |
| 4977 | AGTDDDYTKVLKS  | gj 544474 sp P14064 HA NA                   |
| 4978 | PAKKAEYTETYKK  | gj 547746 sp P33417 IXF NA                  |
| 4979 | TLCHPEYKRISVE  | gj 9910692 sp Q07928 G NA                   |
| 4980 | KSRDDRYAAGTFT  | gj 113022 sp P21192 AC NA                   |
| 4981 | SLNAPKYSSQPPP  | gj 3123263 sp P48743 R  NA                  |
| 4982 | VTFSDYQKTGMD   | gj 90110827 sp P17181 I NA                  |
| 4983 | AEQAERYDDMAAC  | gj 52000887 sp P63104 1 NA                  |
| 4984 | TIPKEQYTIINRT  | gj 729833 sp P40189 IL6 NA                  |
| 4985 | RPEDTFYFDPEFT  | gj 1730070 sp P51812 K; NA                  |
| 4986 | YEDEGVYVNTYGR  | gj 119622212 gb EAX018 NA                   |
| 4987 | IHFDTGYEIKEDI  | gj 90110031 sp Q15349 I NA                  |
| 4988 | LAVSFHYVDSTTM  | gj 74719147 sp Q9NS00 NA                    |
| 4989 | SEKQDTYLSNSSM  | gj 14424438 sp P51587 E NA                  |
| 4990 | <<Marker>>     | contol_spot NA                              |
| 4991 | ANFSEFYVELEAN  | gj 118572619 sp O95622 NA                   |

|      |                |                         |    |
|------|----------------|-------------------------|----|
| 4992 | FFCEEDYKNYKAN  | gj 148540038 ref NP_00' | NA |
| 4993 | GTHCELYKDPCAN  | gj 74730301 sp Q8NFT8   | NA |
| 4994 | ISSHEGYTQIIAN  | gj 119572981 gb EAW52   | NA |
| 4995 | GVSKGAYAGITGN  | gj 119627361 gb EAX06€  | NA |
| 4996 | LKSSDAYKKAWGN  | gj 46397726 sp P60880 € | NA |
| 4997 | VCEQDIYEWTKIN  | gj 132533 sp P25791 RB  | NA |
| 4998 | CQGEVYYAKMNKN  | gj 34532689 dbj BAC865  | NA |
| 4999 | GLHVTEYEDNLKN  | gj 2498342 sp Q16134 E' | NA |
| 5000 | LVSKGEYDWNIGN  | gj 74752809 sp Q9HCR9   | NA |
| 5001 | TISEYIYHCNAQN  | gj 74762601 sp Q8TB40   | NA |
| 5002 | DNWEELYNRYQGG  | gj 51704228 sp P55786 F | NA |
| 5003 | FNKSELYEIPVIG  | gj 74751727 sp Q969S0   | NA |
| 5004 | GGRASDYKSAHKG  | gj 17378805 sp P02686 † | NA |
| 5005 | INAEIYAFINIG   | gj 37999831 sp Q9Y5G1   | NA |
| 5006 | LSGDEFYSDVAKG  | gj 126253808 sp Q8TB22  | NA |
| 5007 | EEDDSLVCISAWN  | gj 73621409 sp Q8WZA1   | NA |
| 5008 | IEEVPNYENQDGG  | gj 148886692 ref NP_00' | NA |
| 5009 | IFHKGSYLRNGWN  | gj 146345380 sp Q15878  | NA |
| 5010 | NGFKIHYESVTVN  | gj 38604740 sp Q7Z407 † | NA |
| 5011 | RGAELEYESLKRQ  | gj 13431722 sp Q9Y4I1 † | NA |
| 5012 | WSEQRDYIDTTWN  | gj 12644052 sp O15260 € | NA |
| 5013 | QASSGKYTQHGGG  | gj 119578137 gb EAW57   | NA |
| 5014 | SYNFELYVDVYQ   | gj 130321 sp P16471 PR  | NA |
| 5015 | VFSGPAYAAEAAR  | gj 18201966 sp O15399 † | NA |
| 5016 | ANSSYPYVEIALG  | gj 13124361 sp Q9UKN7   | NA |
| 5017 | DLFENAYGSSMKG  | gj 55665657 emb CAH72   | NA |
| 5018 | GEEDVIYTWKALG  | gj 66774034 sp Q9NQ25   | NA |
| 5019 | ECAQDFYHNVAER  | gj 56405102 sp Q9UJ41   | NA |
| 5020 | KHNSGYSYAFGER  | gj 119609013 gb EAW88   | NA |
| 5021 | QPSLTYVVCPTDR  | gj 42516574 ref NP_963€ | NA |
| 5022 | WDFEEKYSFEIGG  | gj 21759444 sp Q9NSC7   | NA |
| 5023 | WNKLLYEKMKGG   | gj 23830842 sp P05408 7 | NA |
| 5024 | EATDSLIVFGGFR  | gj 46395756 sp Q7Z7M0   | NA |
| 5025 | GGYETFYSEYPEC  | gj 2499746 sp Q16690 D  | NA |
| 5026 | FFEKPDYEYLRTL  | gj 18202957 sp Q9HCP0   | NA |
| 5027 | KACGVDYEVKAFC  | gj 20141238 sp P49407 / | NA |
| 5028 | LSIADHYVEVLEC  | gj 17372894 sp O75718 † | NA |
| 5029 | RLENNYYWAASEC  | gj 12230989 sp P25440 E | NA |
| 5030 | VKSMDGYESYGEC  | gj 119595261 gb EAW74   | NA |
| 5031 | DLEEDPYLPGNPR  | gj 124174 sp P22304 ID€ | NA |
| 5032 | LDKDPIYVGGGLPR | gj 126363 sp P25391 LAI | NA |
| 5033 | REREVDYDSDMPR  | gj 74752415 sp Q9BX10   | NA |
| 5034 | CRRRDYDDFLQR   | gj 74751721 sp Q969K4 . | NA |
| 5035 | LICDPGYYTGQR   | gj 116241318 sp Q7Z40€  | NA |
| 5036 | YNPMCTYVNRGRR  | gj 8134696 sp Q13275 S  | NA |
| 5037 | DESETGYWITCCP  | gj 2498830 sp P55895 R. | NA |
| 5038 | EIAIDDYDSSGAS  | gj 17366467 sp Q14643 I | NA |
| 5039 | IFSFPDYFCCPAS  | gj 14250804 gb AAH088   | NA |
| 5040 | QVNFTGYVDEHAS  | gj 62287160 sp Q9BYE9   | NA |
| 5041 | AFQENPYTFSPDP  | gj 116268127 ref NP_68€ | NA |
| 5042 | DLIEERYKASQDP  | gj 83305809 sp Q96KB5   | NA |
| 5043 | RKSKGKYAYLLES  | gj 116242505 sp P42261  | NA |

5044 KGSSGGYGS GGAA gi|60390855|sp|Q8TF74| NA  
5045 DYEIDQYEEFCFS gi|544320|sp|P36888|FL NA  
5046 HGKNTGYIFVDFS gi|73620990|sp|Q9Y4C8| NA  
5047 PPGEKPYESHDFS gi|74762546|sp|Q8NB42| NA  
5048 EQKELHYASLSFS gi|25009254|sp|O15389| NA  
5049 KRQVGDYENVIPD gi|6166019|sp|P20273|C| [KRQVGDYENVIPD|Y|8  
5050 VESITVYEEILRQ gi|23396507|sp|Q9BQT9 NA  
5051 TLMGHEYMEMKNT gi|37537859|sp|Q9UJX2| NA  
5052 RIEEGTYGVVYRA gi|145559452|sp|Q9UQ8 NA  
5053 RAETEHYEEIEDY gi|18848311|gb|AAH242 NA  
5054 DSKFEDYLNAESR gi|67472677|sp|Q16181| NA  
5055 YENILKYVNLDAW gi|1708322|sp|P52848|NI NA  
5056 VTTDSPYIIPQHR gi|21903442|sp|P55073|I NA  
5057 FCGLLFYINLADH gi|93195043|sp|Q9UKM7 NA  
5058 LYEANDYEEIVFL gi|17369917|sp|Q9Y3R4| NA  
5059 LSPAFRYQPDPWK gi|266648|sp|P29474|NO NA  
5060 LKEVQKYPNAELA gi|1352618|sp|Q02218|O NA  
5061 DAGCKPYMAPERI gi|24638466|sp|P46734|I NA  
5062 QWFREAYGAVTQT gi|3024422|sp|Q15126|P NA  
5063 AIAVDRYLRVKIP gi|231473|sp|P30542|AA NA  
5064 RPLVEFYEEIKKY gi|126302521|sp|P25098 NA  
5065 CIMA FVYLRV FRE gi|48429211|sp|P08588| NA  
5066 SHLKG IYLNLAAN gi|20137430|sp|Q99467| NA  
5067 LSADSGYIIPLPD gi|129892|sp|P16234|PG [LSADSGYIIPLPD|Y|101  
5068 GIMGSDYINANYV gi|50403770|sp|Q13332|I NA  
5069 EEGADYINANYI gi|33112422|sp|Q16827|I NA  
5070 DGDSNNYINAALT gi|2499758|sp|Q92729|P NA  
5071 LMMKNEYIIPITS gi|18202506|sp|Q15413|I NA  
5072 GAVFIIYTAVLGF gi|12644225|sp|P35346| NA  
5073 GSSRPAYEEFYNC gi|74730301|sp|Q8NFT8| NA  
5074 LQPETS YDIKMQC gi|74761309|sp|Q9BWV1 NA  
5075 YKDEELYDFPAPC gi|50949350|emb|CAB66 NA  
5076 LLYSGKYVWPSHS gi|31981922|ref|NP\_666 NA  
5077 PSYCPAYGRVPHS gi|150416153|sp|Q63HR NA  
5078 YEEKFQYDIVGHS gi|126361953|gb|AAI318 NA  
5079 LEKAGKYVDEENS gi|145580615|ref|NP\_07 NA  
5080 VDPQGIYVISAPS gi|12229810|sp|Q9NYJ7| NA  
5081 GAEGDVYKAPTPS gi|119621454|gb|EAX01 NA  
5082 IVHETGYFSALPS gi|7387592|sp|Q99612|K NA  
5083 MLYMDHYHINPVL gi|119579245|gb|EAW58 NA  
5084 EEDEDCYILNVQS gi|119625689|gb|EAX05 NA  
5085 QHPEGGYAIASSS gi|62286592|sp|O95352| NA  
5086 GLDKSGYFELPTS gi|119610057|gb|EAW89 NA  
5087 WPAKDSYTKQYTS gi|1054776|emb|CAA625 NA  
5088 CHSDGSYCQWPVS gi|93204600|sp|Q6P1M3 NA  
5089 GVETSEYAQGGVS gi|119593736|gb|EAW73 NA  
5090 YSETGDYGNVKVS gi|33301662|sp|Q8TDW NA  
5091 LASSENYKCPGFT gi|12644377|sp|Q01954|I NA  
5092 IISEGLYAI AVL gi|6686048|sp|Q9Y210|T NA  
5093 MCVDDAYVRRMAA gi|68566065|sp|P78362| NA  
5094 MQANPHYARVIGT gi|74733568|sp|Q9H336| NA  
5095 KMLDDLIEDIHWL gi|17368720|sp|Q9C0E2| NA

|                    |                                            |
|--------------------|--------------------------------------------|
| 5096 DSCRENYVRMEHT | gi 51094680 gb EAL2393 NA                  |
| 5097 TAGQEDYDRLRPL | gi 119613432 gb EAW93 TAGQEDYDRLRPL Y 6    |
| 5098 AEGDEIYEDLMRS | gi 13124807 sp P15498 AEGDEIYEDLMRS Y 17   |
| 5099 DEESEDYQNSASI | gi 74752543 sp Q9GZY6 DEESEDYQNSASI Y 19   |
| 5100 EDGEPTYVNGEVA | gi 74752543 sp Q9GZY6 EDGEPTYVNGEVA Y 2    |
| 5101 EPPDHQYYNDFPG | gi 17380299 sp P29353 EPPDHQYYNDFPG Y 3    |
| 5102 HAPAEMYDIMKTC | gi 125472 sp P10721 KIT HAPAEMYDIMKTC Y 9  |
| 5103 WKKYDIYEKQTK  | gi 2494718 sp P78552 I1 NA                 |
| 5104 ERRCKHYVELLVA | gi 62901470 sp Q9HBA0 ERRCKHYVELLVA Y 2    |
| 5105 PTSAPVYQQPQQQ | gi 3122342 sp Q14847 L PTSAPVYQQPQQQ Y 1   |
| 5106 RVDTPHYPRWITK | gi 547803 sp Q05655 KP RVDTPHYPRWITK Y 5   |
| 5107 ALEVAEYLTPVLK | gi 61212142 sp Q9NT62 ALEVAEYLTPVLK Y 18   |
| 5108 GAMAATYSALNRN | gi 1730070 sp P51812 K GAMAATYSALNRN Y 7   |
| 5109 LDPMHNYVNTENV | gi 71152057 sp Q8WU2 LDPMHNYVNTENV Y 3     |
| 5110 SFNNPAYVLEGV  | gi 119595261 gb EAW74 SFNNPAYVLEGV Y 9     |
| 5111 SLISSDYELSDP  | gi 50403745 sp P52333 L SLISSDYELSDP Y 78  |
| 5112 EETNNDYETADGG | gi 399478 sp P31995 FC EETNNDYETADGG Y 2   |
| 5113 GPTRKHYQPYAPP | gi 115973 sp P10747 CD GPTRKHYQPYAPP Y 2   |
| 5114 MAESITYAAVAR  | gi 74736490 sp Q6GTX8 MAESITYAAVARH Y 28   |
| 5115 FASDPKYATPQVI | gi 37999491 sp Q07912 V FASDPKYATPQVI Y 82 |
| 5116 GVGTTYEISV    | gi 57015419 sp Q9ULC8 NA                   |
| 5117 KDTSTEYSEVRTQ | gi 116241290 sp P20138 KDTSTEYSEVRTQ Y 3   |
| 5118 LNQSSGYRYGTDP | gi 125370 sp P06241 FYI LNQSSGYRYGTDP Y 2  |
| 5119 PTLVIAYLMMRQK | gi 1718191 sp P51452 DI PTLVIAYLMMRQK Y 13 |
| 5120 RLLHSDYMNMTPR | gi 115973 sp P10747 CD RLLHSDYMNMTPR Y 1   |
| 5121 SNESVDYRATFPE | gi 125484 sp P08581 ME SNESVDYRATFPE Y 1   |
| 5122 VKAGESYTHIQYL | gi 74751027 sp Q8N5H7 NA                   |
| 5123 ASVNPEYFSAADV | gi 124240 sp P08069 IGF ASVNPEYFSAADV Y 9  |
| 5124 FLRRGEYPDYQQW | gi 117461 sp P07316 CR FLRRGEYPDYQQW Y     |
| 5125 NPATDDYAVPPPR | gi 17366642 sp Q99704 I NPATDDYAVPPPR Y 4  |
| 5126 RARVANYQRDGP  | gi 115702 sp P04040 CA RARVANYQRDGP Y      |
| 5127 Triple Fla    | contol_spot NA                             |
| 5128 pY            | contol_spot NA                             |
| 5129 pY            | contol_spot NA                             |
| 5130 Triple Fla    | contol_spot NA                             |
| 5131 pY            | contol_spot NA                             |
| 5132 pY            | contol_spot NA                             |
| 5133 EEEGENYQKGERG | gi 134461 sp P05060 SC NA                  |
| 5134 IGNHASYYKDALR | gi 20978558 sp Q9UNM NA                    |
| 5135 YDNLEDYHSLPQH | gi 131573277 gb ABO33 NA                   |
| 5136 ATREPPYRVP    | gi 12643409 sp P43243 NA                   |
| 5137 EAAYDPYAYPSDY | gi 23396631 sp Q9Y262 NA                   |
| 5138 TDEYQLYEDIGK  | gi 12643413 sp Q13554 I NA                 |
| 5139 LLPNHSYVFRVRA | gi 13638154 sp P16144 I NA                 |
| 5140 KPGMFGYGRVPFA | gi 118573317 sp Q6UY1 NA                   |
| 5141 SGQNNRYSPKKEK | gi 50403806 sp Q9ULJ8 NA                   |
| 5142 PKQTSAYNISNSS | gi 93140549 sp Q9UIW2 NA                   |
| 5143 RGPPRNYQQNYQN | gi 54040031 sp P67809 NA                   |
| 5144 GPTPASYTTASTP | gi 20981729 sp Q15654 NA                   |
| 5145 QMPEPRYVSMGS  | gi 90110040 sp O75251 I NA                 |
| 5146 FQKFSAYQKSEQQ | gi 23822155 sp Q9BX26 NA                   |
| 5147 ADGEDAYAMKRDL | gi 728880 sp P41227 AR NA                  |

|      |                |                                             |
|------|----------------|---------------------------------------------|
| 5148 | KAFSRGYQLSQHQ  | gi 34925661 sp Q9NQX6 NA                    |
| 5149 | LQKLPHYDLLDEL  | gi 20138891 sp O75925 I NA                  |
| 5150 | GRNQGGYDRYSGG  | gi 1710620 sp P98179 R  NA                  |
| 5151 | PEEDEEYRKQLS   | gi 85700443 sp Q07157  NA                   |
| 5152 | GLKLGİYADVGNK  | gi 113499 sp P06280 AG NA                   |
| 5153 | QADSCPYGTMYS   | gi 68565585 sp Q6UUV9 NA                    |
| 5154 | IVHLINQDDAEL   | gi 130257 sp P14923 PL NA                   |
| 5155 | TSTRQTYFLPVIG  | gi 20532406 sp P17980 F NA                  |
| 5156 | SVSPTRYELIVDK  | gi 90110033 sp Q16363 I NA                  |
| 5157 | HPEIVGYSVPRN   | gi 56404535 sp Q6XZF7  NA                   |
| 5158 | VYENKKYLYLVLE  | gi 116241272 sp Q8IWQ NA                    |
| 5159 | AQGEOPYSSLVSC  | gi 13638154 sp P16144 I [AQGEOPYSSLVSC Y 1: |
| 5160 | NRRFSSYSQMENW  | gi 20138951 sp Q13835 I NA                  |
| 5161 | QSWFDEYNDFDFG  | gi 1706135 sp P54108 C  NA                  |
| 5162 | EDEDEEYEMNRR   | gi 119534 sp P21860 ER NA                   |
| 5163 | QKHPDIYAVPIKT  | gi 13634076 sp Q9UDY2 [QKHPDIYAVPIKT Y 111  |
| 5164 | LQHQQLYYSQDDS  | gi 20139104 sp Q99569 I NA                  |
| 5165 | APARLEYENARK   | gi 4504733 ref NP_0035 NA                   |
| 5166 | KVYLTGYNFTLAD  | gi 17378996 sp O43324 I NA                  |
| 5167 | IKGERGYTGSAGE  | gi 143811380 sp Q07092 NA                   |
| 5168 | HGSEEAYIDPIAM  | gi 74752543 sp Q9GZY6 NA                    |
| 5169 | HNFRPCYLRVCKV  | gi 18206225 sp O94761 I NA                  |
| 5170 | PLTEASYVNLPTI  | gi 125969 sp P08865 RS [PLTEASYVNLPTI Y 139 |
| 5171 | FLRFDHYLNPYYK  | gi 3929376 sp Q12872 S NA                   |
| 5172 | LSNSPNYEEITKW  | gi 22096235 sp Q9UBB9 NA                    |
| 5173 | YLTESGYVNLQRV  | gi 30173484 sp Q9H0D6 NA                    |
| 5174 | ISPDDKIYVADI   | gi 6174935 sp Q15165 P NA                   |
| 5175 | VLGRDLYPNLAE   | gi 117424 sp P23508 CR NA                   |
| 5176 | RRGERVYVNISHP  | gi 549088 sp Q06643 TN NA                   |
| 5177 | SLKLSEYPNVEEL  | gi 34395525 sp Q9NZN5 NA                    |
| 5178 | EYLSSIYEEIEGK  | gi 146329988 sp Q9Y6D NA                    |
| 5179 | TQEQEVYQVPPSV  | gi 8134360 sp Q14511 C NA                   |
| 5180 | SDGMFKYEEIVLE  | gi 2497506 sp Q92796 D NA                   |
| 5181 | GDVLGFYINLPED  | gi 32141382 sp Q9UBL3  NA                   |
| 5182 | SKKHHPYQDPK    | gi 12585199 sp O00257  NA                   |
| 5183 | STLEEVYGSVAKV  | gi 116241339 sp Q07864 NA                   |
| 5184 | FSPHPYINPYMD   | gi 116242494 sp P10071 NA                   |
| 5185 | MSSLYANALFS    | gi 123255 sp P09629 HX NA                   |
| 5186 | QSVPVVYTA VRSP | gi 91771555 sp Q9Y4X4  NA                   |
| 5187 | HTSFRGYIIPKDT  | gi 117205 sp P20813 CP NA                   |
| 5188 | RDRATFYLNVLQQ  | gi 13124090 sp Q9UBF2 NA                    |
| 5189 | AYMLEVYGS LPAF | gi 12643412 sp Q01650 I NA                  |
| 5190 | VPSGSPYPNPSFL  | gi 6093462 sp O75694 N NA                   |
| 5191 | FSITASYANLLIG  | gi 6226404 sp O94956 S NA                   |
| 5192 | MEKVKVYLRVRPL  | gi 6225915 sp O95235 K NA                   |
| 5193 | AIESLNYSVYTTK  | gi 549081 sp P35590 TIE NA                  |
| 5194 | RVKCVRYWPDDTE  | gi 117949771 sp O14522 NA                   |
| 5195 | LPPPPEYELAPSK  | gi 55977848 sp Q12849  NA                   |
| 5196 | GCVAQLYISLALG  | gi 38372794 sp Q8NGZ4 NA                    |
| 5197 | GLSMGNYIGLINR  | gi 125527 sp P19525 E2, [GLSMGNYIGLINR Y 10 |
| 5198 | LFTIARYMELRGY  | gi 41018482 sp Q9P217  NA                   |
| 5199 | H4:17          | contol_spot NA                              |



|                    |                         |    |
|--------------------|-------------------------|----|
| 5200 H8:17         | contol_spot             | NA |
| 5201 QVDETKYPSTCNV | gi 18202928 sp Q9GZN6   | NA |
| 5202 DGEDEYYKSLSPV | gi 126302572 sp Q8WXF   | NA |
| 5203 FRENLIITYIGPV | gi 13431674 sp O00159 I | NA |
| 5204 SCSTPLYDQGGPV | gi 1346900 sp P28562 D  | NA |
| 5205 AEAEKQYEDSCRV | gi 12643392 sp O75110   | NA |
| 5206 GFYRTTYTENGRV | gi 125987789 sp Q07075  | NA |
| 5207 VVKSDDYALPAYV | gi 176657 gb AAA35408.  | NA |
| 5208 CPVKPSYLNILED | gi 450277 gb AAA60120.  | NA |
| 5209 LDEEVEYDMDEED | gi 116241271 sp P55201  | NA |
| 5210 ERENTSYDVTTLQ | gi 126723390 ref NP_59  | NA |
| 5211 ESEDPNYYQYNMQ | gi 45709285 gb AAH678   | NA |
| 5212 FERDEEYLMDCDW | gi 148806872 ref NP_05  | NA |
| 5213 PPDSPGYFDGHVW | gi 50401180 sp Q9NWW    | NA |
| 5214 VFIDEAYVEVAAY | gi 145559533 sp Q6P1X   | NA |
| 5215 FADDLGYGDLGCV | gi 114221 sp P15289 AR  | NA |
| 5216 HVDFNSYVQSPAY | gi 33516903 sp Q9NP62   | NA |
| 5217 PMMNSSYHSNPAY | gi 3024154 sp Q92794 M  | NA |
| 5218 YIEEVDYLGKKAY | gi 126031792 gb AAI314  | NA |
| 5219 DPANVDYEDFLY  | gi 74732160 sp Q96JZ2 I | NA |
| 5220 IAWEETYRTIGLY | gi 20140763 sp Q9BZW    | NA |
| 5221 RANKSDYCNLPLY | gi 73620825 sp Q8TD84   | NA |
| 5222 TNESGYLDISLY  | gi 118601083 sp Q13085  | NA |
| 5223 FGRSGSYNDFGNY | gi 133254 sp P09651 RO  | NA |
| 5224 SRYMELYTHVYNY | gi 19863257 sp Q13616   | NA |
| 5225 WDFNDKYHSQWCQ | gi 81901863 sp Q8VC10 I | NA |
| 5226 HFVEATYKNPELD | gi 150421594 sp Q8IWA   | NA |
| 5227 VSRIPDYLWMGLD | gi 1352387 sp P48449 EI | NA |
| 5228 CYLKDAYDNVTLD | gi 119364639 sp O43272  | NA |
| 5229 LKIKPEYVSGLMD | gi 88911290 sp P49917 I | NA |
| 5230 SDELPAYVGINEA | gi 74734682 sp Q9NWWY   | NA |
| 5231 RRSKDMYHASKSA | gi 147744602 sp Q8N5A   | NA |
| 5232 LFRLEPYADPYD  | gi 28273142 dbj BAC569  | NA |
| 5233 REVEVEYSTVASP | gi 126302534 sp Q9UGN   | NA |
| 5234 GEYADEYVYTRAE | gi 94730407 sp Q9QYX7   | NA |
| 5235 CIPCEPYEYLADE | gi 76803803 sp Q14832 I | NA |
| 5236 HWSVESYSDFWAE | gi 119618879 gb EAW98   | NA |
| 5237 VIFWSLYVDGEWG | gi 73620825 sp Q8TD84   | NA |
| 5238 GLFKGTYGSHGLE | gi 146345419 sp Q5XUX   | NA |
| 5239 DWDDDKYYGTSLE | gi 123829 sp P04438 HV  | NA |
| 5240 DPANCDYVIVSGA | gi 134037158 sp P13994  | NA |
| 5241 SKSCCIYVNNSGA | gi 134048550 gb AAI040  | NA |
| 5242 EEEVIYTDWKME  | gi 74759634 sp Q8IWG1   | NA |
| 5243 <<Marker>>    | contol_spot             | NA |
| 5244 VCEPEDYVVVSTE | gi 23831360 sp P31939 F | NA |
| 5245 GKEDDIYLMVIWE | gi 119590507 gb EAW70   | NA |
| 5246 SHVDDEYRWAGVE | gi 73621060 sp Q96G21   | NA |
| 5247 DGKNGFYINGGYE | gi 119598482 gb EAW78   | NA |
| 5248 HHEAEYVAAYVE  | gi 1168695 sp P43251 B  | NA |
| 5249 PIGEFTYKSSCAF | gi 126180 sp P16581 LY  | NA |
| 5250 AREKEHYCLADLA | gi 20140092 sp Q92552 I | NA |
| 5251 GTCGPRYSNLTKA | gi 6226213 sp O75949 TI | NA |

|                     |                                             |
|---------------------|---------------------------------------------|
| 5252 LDEEGLYCNSCLA  | gi 34098678 sp Q96NE9 NA                    |
| 5253 MKTYDITYVGIGWL | gi 85681942 sp O95302 I NA                  |
| 5254 EFYESAYFIVLIP  | gi 34098465 sp Q86UP2 NA                    |
| 5255 IHDETSYKGGKIP  | gi 14424438 sp P51587 E NA                  |
| 5256 ILSDSNYSPIPVT  | gi 24418685 sp Q9Y2D4 NA                    |
| 5257 VYESFLYKQVYWT  | gi 119605860 gb EAW85 NA                    |
| 5258 FKRELLYEDVFAV  | gi 145566943 sp O43147 NA                   |
| 5259 HNAMDNYESCNLYT | gi 7657265 ref NP_0561  NA                  |
| 5260 PVEVDKYGNIDAV  | gi 121082 sp P23378 GC NA                   |
| 5261 RRDCKDYVSIFVC  | gi 17380347 sp Q9P2S5  NA                   |
| 5262 AESSFKYESGLFV  | gi 71152412 sp Q96LT7  NA                   |
| 5263 KMRAYDYMCMGFV  | gi 119592606 gb EAW72 NA                    |
| 5264 <<Marker>>     | contol_spot NA                              |
| 5265 SFCANVYVDTGFFV | gi 1171882 sp P46721 S( NA                  |
| 5266 WTDGSHYDNTGFFV | gi 50401129 sp Q96NW7 NA                    |
| 5267 EDEFDAYIIVSFV  | gi 116242787 sp Q15393 NA                   |
| 5268 KGQETYYTAAQFV  | gi 119599761 gb EAW79 NA                    |
| 5269 EIGEGAYGKVFKA  | gi 266423 sp Q00534 CD [EIGEGAYGKVFKA Y 24  |
| 5270 NRFSGWYDADLSP  | gi 130348 sp P18669 PG [NRFSGWYDADLSP Y 2   |
| 5271 PARNLTYFGVVHG  | gi 74761551 sp Q9H977  [PARNLTYFGVVHG Y 3:  |
| 5272 STGFQPYCLVVRK  | gi 13124058 sp P57764 C [STGFQPYCLVVRK Y 3: |
| 5273 AADSAPYDWFQDF  | gi 153945761 ref NP_05  [AADSAPYDWFQDF Y 3: |
| 5274 ERTINLYPLTNYT  | gi 74735411 sp O43809 ( NA                  |
| 5275 ISYEGQYIWNMLF  | gi 24212102 sp P59045 † NA                  |
| 5276 SPEELTYLIEALF  | gi 124894 sp P10745 IRE NA                  |
| 5277 EMVESGYVCEGDH  | gi 41688795 sp Q9H4A3  NA                   |
| 5278 AENEKQYVVEPNF  | gi 74739159 sp Q6UXI7 ' NA                  |
| 5279 FLSCQDYGDCEDM  | gi 113418117 ref XP_001 NA                  |
| 5280 LDHKTLYYDTDPF  | gi 30923328 sp Q92993  NA                   |
| 5281 RPCAEDYFNFMGH  | gi 74756634 sp Q5THR3 NA                    |
| 5282 IHSDLYAESVYL   | gi 129874 sp P02775 SC NA                   |
| 5283 AQRNSYVEAEIH   | gi 90185285 sp Q9Y3M8 NA                    |
| 5284 LLAFEHYVNRKH   | gi 135705 sp P10827 TH. NA                  |
| 5285 <<Marker>>     | contol_spot NA                              |
| 5286 IIFHENYSSPGLH  | gi 119625974 gb EAX05  NA                   |
| 5287 PTYKDDYRAWDLH  | gi 119619491 gb EAW99 NA                    |
| 5288 GHSWDKYGFTSVP  | gi 27151703 sp Q9UPU3 NA                    |
| 5289 SIMDTIYICITVP  | gi 38258180 sp Q8NGX2 NA                    |
| 5290 SHCCSRYLCMGAM  | gi 47117811 sp O43609 : NA                  |
| 5291 TKTEEPYFAPCII  | gi 56204404 emb CAI20  NA                   |
| 5292 GKRKVQYESSEPA  | gi 116241277 sp P19022 NA                   |
| 5293 CDEVSKYEKLAKI  | gi 68067660 sp P50750 ( NA                  |
| 5294 EIREKYYYAVYDM  | gi 126366 sp P07942 LAI NA                  |
| 5295 EKSFPTYKDLDFM  | gi 78099088 sp O60331 I NA                  |
| 5296 INETINYEDPCAK  | gi 90110720 sp O60518 I NA                  |
| 5297 NDEEMSYDNNPYI  | gi 85687376 sp P20908 ( NA                  |
| 5298 GQPDFSFKRSNCK  | gi 61216828 sp Q96HF1  NA                   |
| 5299 EVESTEYVNRQFM  | gi 2498733 sp Q14444 C NA                   |
| 5300 HLMNPEYVPKPC   | gi 115076 sp P22004 BM NA                   |
| 5301 SWHNIDYIDNTCC  | gi 119598285 gb EAW77 NA                    |
| 5302 TTYNTLYEILTEQ  | gi 32171483 sp Q8NFP9 NA                    |
| 5303 RGNSDGYIIPINK  | gi 46576868 sp O95490 I NA                  |

|                      |                                             |
|----------------------|---------------------------------------------|
| 5304 CGEGFSYVKIPNK   | gi 57013082 sp Q8IZX4 1 NA                  |
| 5305 AGEPGKYDSMARK   | gi 68840003 sp Q14993 1 NA                  |
| 5306 <<Marker>>      | contol_spot NA                              |
| 5307 GKAMELYHTAPFL   | gi 119606705 gb EAW86 NA                    |
| 5308 TPRDLDYSRVSFM   | gi 119579320 gb EAW58 NA                    |
| 5309 ATPMDAYLRKLGL   | gi 118572680 sp Q01804 NA                   |
| 5310 ELFNEKYGEALGL   | gi 21263630 sp Q9UHL9 NA                    |
| 5311 GSCNPGYVLAQGL   | gi 85700961 sp Q9C0B6  NA                   |
| 5312 YEIEFIYAISPGL   | gi 74705746 sp O60502 1 NA                  |
| 5313 GGYSFKYETVPNL   | gi 124274 sp P05111 IN1 NA                  |
| 5314 HHSKGYIDINPL    | gi 119580040 gb EAW59 NA                    |
| 5315 FESFVDYVAVEQL   | gi 2501460 sp Q93009 U NA                   |
| 5316 ERNLSYDCIGRL    | gi 1708239 sp Q01581 H NA                   |
| 5317 SPYPEEYARLGRL   | gi 68565854 sp O95251 1 NA                  |
| 5318 RKWREQYSDPTRL   | gi 1731427 sp Q03172 Z1 NA                  |
| 5319 DAEDVIYVNWLNLM  | gi 20532389 sp Q9NY33  NA                   |
| 5320 DIDETEHADGGK    | gi 119533 sp P04626 ER [DIDETEHADGGK Y 87   |
| 5321 NSSDPTYTSSLGG   | gi 19860819 sp P54760 E NA                  |
| 5322 PAFDNLYYWDQDP   | gi 119533 sp P04626 ER [PAFDNLYYWDQDP Y 1   |
| 5323 AVLMERYRLDNDL   | gi 70907264 gb AAZ152E NA                   |
| 5324 PKSPGEYVNIEFG   | gi 547738 sp P35568 IR5 [PKSPGEYVNIEFG Y 89 |
| 5325 VYSTDYRFLNPS    | gi 134035335 sp Q16288 NA                   |
| 5326 YEDENLYEGLNLD   | gi 547896 sp P11912 CD [YEDENLYEGLNLD Y 1E  |
| 5327 <<Marker>>      | contol_spot NA                              |
| 5328 YIDPFTYEDPNEA   | gi 119615430 gb EAW95 [YIDPFTYEDPNEA Y 611  |
| 5329 YVDLQAYEDPAQG   | gi 47117832 sp P21709 E NA                  |
| 5330 YVLDDEYTSSVGS   | gi 547759 sp Q06187 BT [YVLDDEYTSSVGS Y 5E  |
| 5331 DIYRASYRRGDR    | gi 143811416 sp P29376 NA                   |
| 5332 IMHDSNYVSKGST   | gi 129892 sp P16234 PG NA                   |
| 5333 APESLAYNKFSIK   | gi 85681908 sp P00519 / NA                  |
| 5334 IYKNPDYVRKGDT   | gi 143811474 sp P17948 NA                   |
| 5335 IYSGDYRQGRIA    | gi 10720097 sp Q12866 1 [IYSGDYRQGRIA Y 75  |
| 5336 KIGEGTYGTVFKA   | gi 4033704 sp Q00535 C [KIGEGTYGTVFKA Y 15  |
| 5337 KLWLKPYVDLQAY   | gi 47117832 sp P21709 E NA                  |
| 5338 SGDRSGYSSPGSP   | gi 13124806 sp P10636 1 NA                  |
| 5339 SDSTNEYMDMKPG   | gi 125472 sp P10721 KIT [SDSTNEYMDMKPG Y 7  |
| 5340 LTSNQEYLDLSMP   | gi 120046 sp P11362 FG [LTSNQEYLDLSMP Y 7E  |
| 5341 TSTEPQYQPGENL   | gi 125711 sp P12931 SR [TSTEPQYQPGENL Y 5:  |
| 5342 DEPEGDYEEVLEP   | gi 123557 sp P14317 HC [DEPEGDYEEVLEP Y 3E  |
| 5343 YDVSRMYVDPSEI   | gi 143811440 sp P16885 [YDVSRMYVDPSEI Y 75  |
| 5344 TLNEDSYKDSTLI   | gi 1345593 sp Q04917 1 NA                   |
| 5345 KMQQNGYENPTYK   | gi 112927 sp P05067 A4_ [KMQQNGYENPTYK Y 7  |
| 5346 LLNWIGYVNSGFN   | gi 114765 sp P07550 AD NA                   |
| 5347 TNTEGGYTCMCAGXX | gi 119226 sp P01133 EG NA                   |
| 5348 <<Marker>>      | contol_spot NA                              |
| 5349 CIVENEYSINHT    | gi 120046 sp P11362 FG NA                   |
| 5350 GPDGTPYVTVLKT   | gi 120050 sp P22607 FG NA                   |
| 5351 NYDGKDYDPVAAR   | gi 20138589 sp Q15691 1 [NYDGKDYDPVAAR Y 1  |
| 5352 LINKKCYEMASHL   | gi 130979 sp P07737 PR [LINKKCYEMASHL Y 12: |
| 5353 IKWSNIYEDNGDD   | gi 74751065 sp Q8N6N3 [IKWSNIYEDNGDD Y 13:  |
| 5354 ELQANCYEEVKDR   | gi 116848 sp P23528 CO [ELQANCYEEVKDR Y 1:  |
| 5355 RVITNQYNNPAGL   | gi 20178312 sp O00151 1 [RVITNQYNNPAGL Y 14 |

|                    |                                             |
|--------------------|---------------------------------------------|
| 5356 CSVCPDYDLCSVC | gj 74735628 sp Q13501 ; [CSVCPDYDLCSVC Y 1- |
| 5357 VERADGYEPPVQE | gj 47117764 sp P61247 F [VERADGYEPPVQE Y 2  |
| 5358 LYPNTPYAYTFWT | gj 113984 sp P27695 AP NA                   |
| 5359 YSNTRAYYFVKFK | gj 68565218 sp Q8N884  NA                   |
| 5360 HSGEKPYGCVCEG | gj 10720410 sp P17028 z NA                  |
| 5361 FKQAEEYLSFAFE | gj 85681034 sp Q5JVF3  NA                   |
| 5362 DIRKDLYANTVLS | gj 89276723 gb ABD665; [DIRKDLYANTVLS Y 29- |
| 5363 DTYLKGYWAIKLA | gj 9988062 sp P50990 T( NA                  |
| 5364 TATEPQYQPGENL | gj 125870 sp P07947 YE: [TATEPQYQPGENL Y 5: |
| 5365 YMEDSTYYKASKG | gj 3183518 sp Q05397 F, [YMEDSTYYKASKG Y 6  |
| 5366 APPPVFYNKPPEI | gj 2498313 sp Q16643 D [APPPVFYNKPPEI Y 62: |
| 5367 RTTDGVYEGVAIG | gj 116241237 sp P53396 [RTTDGVYEGVAIG Y 6;E |
| 5368 KDTETVYSEVRKA | gj 129747 sp P16284 PEI [KDTETVYSEVRKA Y 71 |
| 5369 <<Marker>>    | control_spot NA                             |
| 5370 KLVDGCYSFWQAG | gj 1346696 sp P49356 PI [KLVDGCYSFWQAG Y ;E |
| 5371 GAFGEVYEGQVSG | gj 146328566 sp Q9UM7 [GAFGEVYEGQVSG Y 1    |
| 5372 SGGEDGYVRIHYF | gj 2494895 sp Q13347 IF NA                  |
| 5373 EVPSDQYYWAPLA | gj 14916543 sp O60716 ( NA                  |
| 5374 PLYWDLYEHAQQQ | gj 17366642 sp Q99704 I [PLYWDLYEHAQQQ Y ;E |
| 5375 DDSDDSYFTSSSS | gj 21263420 sp Q9NP61  [DDSDDSYFTSSSS Y 3-  |
| 5376 SSDKPLYDQLLQH | gj 134937 sp P13574 ST  NA                  |
| 5377 DEEDENYTRGGIR | gj 731873 sp P40466 FK  NA                  |
| 5378 LNFNDNYTTILQH | gj 729290 sp P21657 DA NA                   |
| 5379 ILNMGLYINPKNL | gj 1173439 sp P46954 SI NA                  |
| 5380 PGSDDCYCTPKIL | gj 1352985 sp P47043 Z/ NA                  |
| 5381 CYKEELYQCRNSD | gj 1177049 sp P46974 Z  NA                  |
| 5382 NNISVKYVSPGSV | gj 1169823 sp P04386 G. NA                  |
| 5383 STCSTDYELSKRF | gj 1169136 sp P41817 C  NA                  |
| 5384 KPIMTPYVSYYP  | gj 41016991 sp Q03063 I NA                  |
| 5385 GKFEDVYQLTSEL | gj 30315972 sp O08605 I NA                  |
| 5386 HSEPPVYANLSNF | gj 135298 sp P05412 JUI [HSEPPVYANLSNF Y 17 |
| 5387 YVEKCKYMDSKMK | gj 1171955 sp P42338 PI NA                  |
| 5388 DKVEFLYCDLASM | gj 32469744 sp Q8N514 [ NA                  |
| 5389 GLYKDRYAYRDSM | gj 20140806 sp Q9HBG6 NA                    |
| 5390 <<Marker>>    | control_spot NA                             |
| 5391 NEECTSYSTINPM | gj 40067493 gb AAR385; NA                   |
| 5392 PAAEDNYGYDACA | gj 25008854 sp Q99567 I NA                  |
| 5393 WDWKDPYEVGHSM | gj 62286903 sp O15033 I NA                  |
| 5394 GGKPKYPPNKVM  | gj 85542094 sp Q5MNZ6 NA                    |
| 5395 ETADGKYAQKLFN | gj 13626094 sp Q9UGM1 NA                    |
| 5396 IGPEEDYDPGYFN | gj 34395516 sp O15085 , NA                  |
| 5397 KVNKDPYVADMEN | gj 116241243 sp Q13023 NA                   |
| 5398 NCKKLYIDAQEN  | gj 120953300 ref NP_00' NA                  |
| 5399 SYRNSSYENAREN | gj 68566212 sp Q8NAP3 NA                    |
| 5400 FAEEPIYCYTPHN | gj 20139072 sp Q96RD6 NA                    |
| 5401 NLYAGDYRVQGR  | gj 729008 sp Q08345 DD NA                   |
| 5402 IKDRDKYIPKQLN | gj 119120884 ref NP_00' NA                  |
| 5403 NWPEEHYATVELN | gj 148675937 gb EDL07; NA                   |
| 5404 SPSMLDYDTENLN | gj 74723323 sp Q7Z460 , NA                  |
| 5405 YVAPPKYKSSLLN | gj 74762494 sp Q8IYA7 I NA                  |
| 5406 HTGEEPYEYKGMN | gj 119604454 gb EAW84 NA                    |
| 5407 TWFPEYVIYPTN  | gj 47117358 sp Q8NG68 NA                    |

|      |                |                         |    |
|------|----------------|-------------------------|----|
| 5408 | AASEVHYSTRNPQ  | gi 119591472 gb EAW71   | NA |
| 5409 | FSAKPLYTALPPQ  | gi 13124503 sp O60315   | NA |
| 5410 | IINKEGYLEDSPQ  | gi 23397010 sp Q9NR11   | NA |
| 5411 | NWYNPTYPLSPPQ  | gi 66774052 sp Q8WVQ    | NA |
| 5412 | YRNEIAYLNKLQQ  | gi 464971 sp P33981 TTI | NA |
| 5413 | IHKMDGYSCDGVQ  | gi 14423634 sp Q9P0K1   | NA |
| 5414 | PACDPGYQPTPGG  | gi 119577388 gb EAW56   | NA |
| 5415 | PCKDDEYCMEEGG  | gi 48428570 sp O75443   | NA |
| 5416 | DLIEKDYADREAR  | gi 13959371 sp Q9H479   | NA |
| 5417 | IMRECWYANGAAR  | gi 547777 sp P36897 TG  | NA |
| 5418 | LYREAVYNSVAAR  | gi 119569633 gb EAW49   | NA |
| 5419 | HGEWAKYSNFDVA  | gi 124174 sp P22304 ID  | NA |
| 5420 | SSSPGTYVGPFGG  | gi 27734581 sp Q9BWW    | NA |
| 5421 | VYDDETYMMQDVA  | gi 68052029 sp Q15723 I | NA |
| 5422 | DEELPDYIMVMVA  | gi 50233812 ref NP_997  | NA |
| 5423 | MNNIENYVDSKVA  | gi 12230074 sp Q14314 I | NA |
| 5424 | AARETSYQWKAER  | gi 68067946 sp O75182   | NA |
| 5425 | EKFSGAYVNNRIR  | gi 29337239 sp Q9P241   | NA |
| 5426 | HAPDNKYKMDGIR  | gi 17433288 sp Q9Y264   | NA |
| 5427 | LAADSAYDQKNIR  | gi 8039810 sp Q14188 T  | NA |
| 5428 | EECNKDYGSSQTL  | gi 119605325 gb EAW84   | NA |
| 5429 | CSHENPYLCSNEC  | gi 34922606 sp Q96CW    | NA |
| 5430 | EGRCGYVEKKKR   | gi 108885172 sp Q9NUP   | NA |
| 5431 | LRELERYVTSLR   | gi 20141192 sp O60885 I | NA |
| 5432 | SRTASKYTDRALR  | gi 27805463 sp Q96DF8   | NA |
| 5433 | FFSGDKYRVNLR   | gi 139653 sp P04004 VT  | NA |
| 5434 | YTFDGKYEAKQLR  | gi 94730583 sp Q9NSE4   | NA |
| 5435 | MQKGIDYVKNKMR  | gi 25014054 sp Q9NY46   | NA |
| 5436 | YQEKIRYARVYLR  | gi 110278938 sp Q7Z47   | NA |
| 5437 | VDCMEVYEYPGYR  | gi 1717814 sp P49746 T  | NA |
| 5438 | DNDSDWDYTKPYLG | gi 62286941 sp Q8WVV    | NA |
| 5439 | ERSGECYHQVAMG  | gi 119587445 gb EAW67   | NA |
| 5440 | IFESCGYEANYLG  | gi 62511243 sp Q92625   | NA |
| 5441 | MGNEPAYVWLWLG  | gi 3183202 sp O14975 S  | NA |
| 5442 | SFFPELYFNVDNG  | gi 47606646 sp P61421   | NA |
| 5443 | PRFDTEYRSRGCS  | gi 61211870 sp Q96L58 I | NA |
| 5444 | VMQEPGYIMGICS  | gi 17380293 sp Q9UBS8   | NA |
| 5445 | DVPHDPYVKISDS  | gi 74732954 sp Q9BS16   | NA |
| 5446 | GTFFDKYSAAPDS  | gi 94730396 sp Q10571 I | NA |
| 5447 | PKPQELYVCFHDS  | gi 73621379 sp Q9ULD6   | NA |
| 5448 | ARPAEHYSRMKES  | gi 50949921 emb CAH1C   | NA |
| 5449 | AYQNTIYLNLDWH  | gi 143811362 sp P15144  | NA |
| 5450 | EDNVKSYMDMQRR  | gi 109940027 sp Q13075  | NA |
| 5451 | QGEDQYYLRVTTV  | gi 116533 sp P10909 CL  | NA |
| 5452 | TLPPCIYMAPMNQ  | gi 13432121 sp P55286 C | NA |
| 5453 | DVRAAVYQPQPHP  | gi 2506872 sp P02751 FI | NA |
| 5454 | EENWSFYPNVRT   | gi 20139420 sp P78509 F | NA |
| 5455 | LKMKEKYLNVSAC  | gi 14916977 sp O75343 C | NA |
| 5456 | MVIPDLYLNAGGV  | gi 118541 sp P00367 DH  | NA |
| 5457 | LSEDCLYLNITP   | gi 119576 sp P23141 ES  | NA |
| 5458 | GECSIDYVEMAVN  | gi 59802911 sp O75891 I | NA |
| 5459 | EPPPPGYENVSDI  | gi 548615 sp Q04609 FO  | NA |

|                    |                                               |
|--------------------|-----------------------------------------------|
| 5460 AKAWELYGSPNAL | gj 1346191 sp P48637 G NA                     |
| 5461 VCEEMTYEEIQEH | gj 2507178 sp P16118 F NA                     |
| 5462 PAPPEEYVPMVKE | gj 3183518 sp Q05397 F NA                     |
| 5463 LGTEELYGYLKKY | gj 125266 sp P19784 CS [LGTEELYGYLKKY Y 25    |
| 5464 ELLTELYGKVGEI | gj 110282976 sp P46020 NA                     |
| 5465 NTVWVDYPNIVRV | gj 8247933 sp P30613 KI NA                    |
| 5466 DALQHPYINWVWD | gj 2507196 sp P53779 M NA                     |
| 5467 RTGSISYINIIMP | gj 33860175 sp Q99705 I NA                    |
| 5468 MFTPKNYIIIAPK | gj 62297775 sp Q13255 I NA                    |
| 5469 GKEYLFYLNVCGE | gj 60416403 sp P11717 I NA                    |
| 5470 AVITVMYTAVTPM | gj 14423819 sp Q9P1Q5 NA                      |
| 5471 LVRFLFYANLHGS | gj 2495018 sp Q15077 P NA                     |
| 5472 DTSSVLYTAVQPN | gj 129890 sp P09619 PG [DTSSVLYTAVQPN Y 1C    |
| 5473 PREGPPYEGKKNC | gj 152032205 sp Q8N9Y NA                      |
| 5474 FKFEENYTSQNVL | gj 113422894 ref XP_001 NA                    |
| 5475 LQRKEAYIFYPPG | gj 119599990 gb EAW79 NA                      |
| 5476 PNDDRDYCDCDPG | gj 118572677 sp P46531 NA                     |
| 5477 AGSNTKYRRLCPC | gj 152040009 sp Q3V5L NA                      |
| 5478 ELRSTKYISDGQC | gj 62287504 sp Q6X4U4  NA                     |
| 5479 LGQEERYELLNVL | gj 8134331 sp Q9Y2Q0 A NA                     |
| 5480 RMDSSYTSKLLS  | gj 122065126 sp Q9Y2D  NA                     |
| 5481 VNECEIYSGTPLS | gj 88911282 sp O60494  NA                     |
| 5482 IIWATSYEDFYLS | gj 73920246 sp O00750 I NA                    |
| 5483 VVKDPFYVIESLS | gj 23396800 sp Q9NTG1 NA                      |
| 5484 ESAPDSYIGIGNS | gj 74731046 sp Q969I6 S NA                    |
| 5485 FYGEDFYCEIPRS | gj 13959562 sp Q14644 I NA                    |
| 5486 SVSNVEYPMMPRS | gj 74756617 sp Q5THJ4  NA                     |
| 5487 IMKRPKYCSSDSS | gj 73920151 sp Q6ZT98  NA                     |
| 5488 ETECDVYMLPKSS | gj 13937007 gb AAK500  NA                     |
| 5489 TLPEHKYPSLHSS | gj 2506535 sp Q01851 P NA                     |
| 5490 LQSELQYRRGATS | gj 115502505 sp Q86VF7  NA                    |
| 5491 FLRQPIYMEVRVL | gj 466206 sp Q05996 ZP NA                     |
| 5492 LGSEDYYSHERCT | gj 114223 sp P15848 AR NA                     |
| 5493 TALESDYAGPGDT | gj 51316104 sp Q9NQC7 NA                      |
| 5494 APQEGSYLDFWDT | gj 5902808 ref NP_0061 NA                     |
| 5495 SFSTDVYIVMWDT | gj 119585869 gb EAW65 NA                      |
| 5496 FGKEHFYVIDGFT | gj 109896161 sp Q8IZQ1 NA                     |
| 5497 VVNLINYQDDAEL | gj 461854 sp P35222 CT [VVNLINYQDDAEL Y 14    |
| 5498 KKAGNLYDISEDN | gj 14548162 sp Q13224 I [KKAGNLYDISEDN Y 12   |
| 5499 DYHNPYLVLPD   | gj 14194891 sp O43561 I NA                    |
| 5500 GEDDGDYESPNEE | gj 10720065 sp Q13094 I [GEDDGDYESPNEE Y 1    |
| 5501 NCSEEMYRLMLQC | gj 547807 sp P07949 RE [NCSEEMYRLMLQC Y 9     |
| 5502 PTIEDSYTKICSV | gj 133486 sp P10301 RR [PTIEDSYTKICSV Y 66 F  |
| 5503 KAFAEYASVDRN  | gj 84029384 sp Q9NWQ  [KAFAEYASVDRN Y 2       |
| 5504 RPDSPVYANLQEL | gj 47117238 sp Q8IWW  [RPDSPVYANLQEL Y 2      |
| 5505 SNQEEAYVTMSSF | gj 124351 sp P16871 IL7 [SNQEEAYVTMSSF Y 4    |
| 5506 SYKVILYELENFQ | gj 13124690 sp P26998 C [SYKVILYELENFQ Y 29   |
| 5507 VVDSGVYAVPPPA | gj 8134339 sp P56945 B  [VVDSGVYAVPPPA Y 4    |
| 5508 KLGGGQYGEVYEG | gj 85681908 sp P00519 / [KLGGGQYGEVYEG Y 2    |
| 5509 TIICLCYLFIIK  | gj 401126 sp P30874 SS [TIICLCYLFIIK Y 228 P3 |
| 5510 MMDAEEYLVPQAF | gj 3913590 sp Q15303 E NA                     |
| 5511 LVSIDRYLALVKT | gj 2506481 sp P30411 BI [LVSIDRYLALVKT Y 161  |

5512 ANGEAVYCKFHVK gj|115702|sp|P04040|CA [ANGEAVYCKFHVK|Y|2:  
5513 DTGSRYYKEIPLS gj|2499575|sp|Q15139|K [DTGSRYYKEIPLS|Y|46:  
5514 HPDYEEYINLEGT gj|46397678|sp|Q13017|I [HPDYEEYINLEGT|Y|30:  
5515 LGNGVLYASVNPE gj|124240|sp|P08069|IGF [LGNGVLYASVNPE|Y|9:  
5516 NSRLSAYPALEGV gj|116024|sp|P06127|CD [NSRLSAYPALEGV|Y|46:  
5517 RGEYDPYQQWMGL gj|117461|sp|P07316|CR [RGEYDPYQQWMGL|Y|  
5518 TGHGYVVEYPSRY gj|8134360|sp|Q14511|C [TGHGYVVEYPSRY|Y|11:  
5519 CANPILYAFLSDN gj|401126|sp|P30874|SS [CANPILYAFLSDN|Y|31:  
5520 ECQRYVYSILCCK gj|20178318|sp|P25116|F [ECQRYVYSILCCK|Y|38:  
5521 YVNTTLYEKFTYA gj|464868|sp|Q02763|TIE [YVNTTLYEKFTYA|Y|11:  
5522 VVDADEYLIPQQG gj|2811086|sp|P00533|E [VVDADEYLIPQQG|Y|1C  
5523 EEDEDLYDCVENE gj|13124807|sp|P15498| [EEDEDLYDCVENE|Y|11:  
5524 IPDPSKYCGPYKP gj|114276|sp|P20933|AS [IPDPSKYCGPYKP|Y|17:  
5525 LGTEELYGYLKKY gj|125266|sp|P19784|CS [LGTEELYGYLKKY|Y|25:  
5526 PEGHEYYRVREDG gj|56405328|sp|P29597| [PEGHEYYRVREDG|Y|1  
5527 TPDGTCYPPPPVP gj|50403731|sp|P27708|F NA  
5528 AMSTDAYPKNPHL gj|6685982|sp|O95721|S NA  
5529 SPDEEDYDYESYE gj|1170875|sp|P46821|M NA  
5530 VKDAGFYVCRVNN gj|20455075|sp|Q9UDY8 NA  
5531 LDEGGYYISPRIT gj|1705485|sp|P51451|BI NA  
5532 REELAPYPKSKKA gj|74735456|sp|O60828|I NA  
5533 DQAVTEYVATRWY gj|74760462|sp|Q8TD08| NA  
5534 VGSRADYDTLSLR gj|20139301|sp|Q9Y446| NA  
5535 ENANSGYEAHPV gj|116242482|sp|Q9UN8| NA  
5536 FCPNAKYVMKTDI gj|51315813|sp|O75752|I NA  
5537 TAGASDYFSLVSV gj|45477168|sp|Q9HBB8 NA  
5538 SNPTDIYPSKWIA gj|1717799|sp|P49815|T NA  
5539 GGGYYHYSYSVVR gj|119589914|gb|EAW69 NA  
5540 TSAKTGYNVKQLF gj|13633595|sp|Q9NRW NA  
5541 REAPDITYLAQGPD gj|57015399|sp|Q15653|I NA  
5542 RTSAGSYSSPPPA gj|74712301|sp|Q6ZVM7 [RTSAGSYSSPPPA|Y|11:  
5543 DDLDPYYRGSHAA gj|12585290|sp|Q9P286| NA  
5544 CDPAGYYCGFKAT gj|46397659|sp|P60900|F NA  
5545 GKFGNVYLAREKQ gj|27923855|sp|O14965| [GKFGNVYLAREKQ|Y|1:  
5546 LTYLDGYDRDDKE gj|730318|sp|P39687|AN NA  
5547 LRLATSYIAYLMD gj|47117699|sp|P61296|F NA  
5548 ANMENLYTALQSI gj|116241246|sp|P16157 NA  
5549 YADSYYYEDGDQP gj|41281911|ref|NP\_848 NA  
5550 DYTTEKYREKSLY gj|12585290|sp|Q9P286| NA  
5551 ADKFQMYVTYCKN gj|8928460|sp|O75962|T NA  
5552 LQCSQTYGRVHKV gj|62511244|sp|Q9BUH8 NA  
5553 PTRKFAYLGRLAH gj|730451|sp|P40429|RL NA  
5554 DFRFKTYAPVAFR gj|74752158|sp|Q99755|I NA  
5555 PAPHAQYAIPNRH gj|1177024|sp|P42694|HI [PAPHAQYAIPNRH|Y|13  
5556 KEIAEAYLGKVVH gj|1708307|sp|P54652|H NA  
5557 ISTMQQYNLCVYR gj|74760694|sp|Q96A28| NA  
5558 RPSSAIYPSDSFR gj|6919894|sp|Q92974|A NA  
5559 LRMGNLYDIDEDQ gj|14285603|sp|Q12879|I NA  
5560 QENESGYERRPLE gj|90101344|sp|Q9BUJ2| NA  
5561 QQRDLAYCVSQLP gj|30172802|sp|Q15021| NA  
5562 QEARNIYQEFLLS gj|19855059|sp|O43566|I NA  
5563 KCPCEVYHLMKNC gj|56405328|sp|P29597| NA

|                     |                                             |
|---------------------|---------------------------------------------|
| 5564 FTQDSNYLLTGGQ  | gij12643951 sp Q9Y3F4  NA                   |
| 5565 EDPQTFYYAVAVV  | gij136191 sp P02787 TR NA                   |
| 5566 PTPGPVYEQMRSW  | gij23813906 sp Q9NQ75 NA                    |
| 5567 ICVPLRYKSLVTG  | gij112938 sp P29275 AA: NA                  |
| 5568 VIEINPYLLGTMS  | gij1172602 sp P28062 P: NA                  |
| 5569 GAKFKKYEEIDNA  | gij1706611 sp P49411 EI NA                  |
| 5570 ITIKLGYANAKIY  | gij729816 sp P41091 IF2 NA                  |
| 5571 FCGTVEYMAPEVV  | gij1730070 sp P51812 K: NA                  |
| 5572 LHSVVDQYLNKLT  | gij10720079 sp Q9Y333  [LHSVVDQYLNKLT Y 35] |
| 5573 HKPDEIYGMIERL  | gij33301371 sp Q86U44  NA                   |
| 5574 ADFYAAAYINILLG | gij6174924 sp O43913 O NA                   |
| 5575 PEAHSLYVNLILS  | gij28558367 sp Q9UHV7 NA                    |
| 5576 VAAAHGYLNLGQI  | gij129542 sp P29122 PC NA                   |
| 5577 ALVAIDYINQNLP  | gij112910 sp P02765 FE` NA                  |
| 5578 YQKTAPYVPMYYV  | gij1705606 sp P07498 C, NA                  |
| 5579 SALVLQYLRVPLV  | gij67476446 sp P00740 F NA                  |
| 5580 QAVSVNYTAVGRI  | gij27924006 sp Q9Y493 , NA                  |
| 5581 AVPVEAYGWPCCG  | gij1663764 gb AAB1864( NA                   |
| 5582 MKHHTLYINLISI  | gij24211603 sp Q9Y312 , NA                  |
| 5583 SPVETPYANVDAE  | gij110283010 sp Q9NX9: NA                   |
| 5584 EKLNDTYVNVGLY  | gij55977754 sp O14524 I NA                  |
| 5585 WQESGVYTAVMME  | gij12644073 sp O60287 I NA                  |
| 5586 KQRKTSYLNALKK  | gij50403803 sp Q9P2Q2 NA                    |
| 5587 RRIPLYYPNAGLT  | gij114062 sp P08519 AP, NA                  |
| 5588 GIIATIYIIPGDI  | gij12585187 sp P82251 E NA                  |
| 5589 NEDKSPYPNPETT  | gij6165981 sp Q13936 C NA                   |
| 5590 AEPGDCYEEIFQY  | gij23396521 sp Q9P0X4  NA                   |
| 5591 ILFFTTYIIISFL  | gij4033376 sp Q14524 S NA                   |
| 5592 NDFVTRYLNIFGE  | gij13124095 sp Q9UJS0  NA                   |
| 5593 PTNLPKYVKELHL  | gij20138400 sp Q9NZU0 NA                    |
| 5594 SPRSRDYNPNYNS  | gij77416392 sp O75122 ( NA                  |
| 5595 DLEQPTYRYESSS  | gij85700443 sp Q07157 , NA                  |
| 5596 KRNNAKYRRIQTL  | gij5921785 sp O43525 K NA                   |
| 5597 LKDIVEYYNDSNG  | gij141596 sp P25311 ZA: NA                  |
| 5598 SAVGHEYVAEVEK  | gij123557 sp P14317 HC [SAVGHEYVAEVEK Y 1(  |
| 5599 G4:17          | contol_spot NA                              |
| 5600 G8:17          | contol_spot NA                              |
| 5601 YFRCDGYKGYDLV  | gij125987841 sp Q99102 NA                   |
| 5602 EDQDSQYVCFTLV  | gij21362899 sp Q96BH1  NA                   |
| 5603 LPGDHSYVSQPLV  | gij74747078 sp Q5VUB5 NA                    |
| 5604 PNHKDYYNCSAMV  | gij57015409 sp Q8IWT3  NA                   |
| 5605 GGFQIKYVAMDPV  | gij68067717 sp P98066 1 NA                  |
| 5606 LFFNTKYFQLKNV  | gij119627824 gb EAX07, NA                   |
| 5607 DLEFDEYQKIHTG  | gij74762348 sp Q6P280 , NA                  |
| 5608 APKELIYAASNLQ  | gij125763 sp P01599 KV NA                   |
| 5609 IKS RDPYKNRVVV | gij71152965 sp Q9HBG7 NA                    |
| 5610 QGEVDVYVNGEWV  | gij1346362 sp P31321 K, NA                  |
| 5611 DTEDTVYKCNWDD  | gij11136118 sp Q9UJW7 NA                    |
| 5612 CYEDNDYESKMMQ  | gij12643900 sp Q9UMN€ NA                    |
| 5613 EQESGSYIQGGRW  | gij7959193 dbj BAA9599 NA                   |
| 5614 KIGNTFYVNVSLQ  | gij41148616 ref XP_373, NA                  |
| 5615 PVDNHRYKWNGRW  | gij119612915 gb EAW92 NA                    |



|      |                |                            |
|------|----------------|----------------------------|
| 5616 | SLRNLKYKNFMPW  | gi 10720377 sp Q9UL59  NA  |
| 5617 | WKLDTKYANKNLW  | gi 3192971 gb AAC1916f NA  |
| 5618 | ILNCEYYFISPWW  | gi 2499586 sp Q16566 K NA  |
| 5619 | EMGRDGYSDSEHY  | gi 6166047 sp O00555 C NA  |
| 5620 | IYVEFLYSDANIY  | gi 219539 dbj BAA14320 NA  |
| 5621 | LWGEEAYVCIMHY  | gi 26345698 dbj BAC365 NA  |
| 5622 | RLKCDFYLMNAIY  | gi 114676760 ref XP_001 NA |
| 5623 | VICSDCYDNANIY  | gi 54036167 sp O94898 I NA |
| 5624 | DCREEQYPCTRLY  | gi 1708914 sp P55001 M NA  |
| 5625 | VVEEGYYLNNFD   | gi 125991219 sp Q9ULQ NA   |
| 5626 | CIEPPPYGNNSHD  | gi 48428570 sp O75443  NA  |
| 5627 | IWSNPRYLIGSGD  | gi 134034147 sp Q86XLc NA  |
| 5628 | VTKNDPYKPHPHD  | gi 548720 sp Q04864 RE NA  |
| 5629 | FTDNKTYVFKAKD  | gi 109731197 gb AAI135 NA  |
| 5630 | GGKMSPYTNCYAQ  | gi 73620953 sp Q96KJ9  NA  |
| 5631 | KWHEKPYEWNQVD  | gi 119602262 gb EAW81 NA   |
| 5632 | YLSNSGYLKVLD   | gi 41017500 sp Q92621 I NA |
| 5633 | KAEETRYPQQYQP  | gi 60390636 sp Q8NDT2 NA   |
| 5634 | SVRKPRYVRRERP  | gi 7020791 dbj BAA9127 NA  |
| 5635 | GISKPVYATIGVG  | gi 121756 sp P11168 GT NA  |
| 5636 | CGEEDEYFDWVWD  | gi 126253805 sp Q6PJ21 NA  |
| 5637 | LVEGESYVCGSIE  | gi 6225242 sp O15075 D NA  |
| 5638 | DEFKTKYKINVKE  | gi 31077164 sp O95757 I NA |
| 5639 | HASWETYPRPTKE  | gi 416733 sp P04003 C4  NA |
| 5640 | SHRCEEYCKAYKE  | gi 145559547 sp Q6ZR5 NA   |
| 5641 | HLAATLYVCVCTA  | gi 119617979 gb EAW97 NA   |
| 5642 | KDGEDEYRCVRVG  | gi 13124582 sp P57727  NA  |
| 5643 | <<Marker>>     | control_spot NA            |
| 5644 | SPHENDYDNSPTA  | gi 109940166 sp P81133 NA  |
| 5645 | QQCDSPYVVKYYG  | gi 46577700 sp Q13188  NA  |
| 5646 | YGMIEDYENEQYG  | gi 94707996 sp Q9UPT8 NA   |
| 5647 | LGRELPHYDPVDTE | gi 93204549 sp Q8NC60 NA   |
| 5648 | TRPEGSYFSKYSE  | gi 122065126 sp Q9Y2D NA   |
| 5649 | KQQMGSYSNNSTE  | gi 154240671 ref NP_77f NA |
| 5650 | GISGTIYEYGALT  | gi 121672 sp P22352 GP NA  |
| 5651 | PIVYEKYKDPSKT  | gi 41393606 ref NP_958f NA |
| 5652 | LLSGERYKEDPWL  | gi 1706507 sp P54098 DI NA |
| 5653 | IINSEIYWPNGLT  | gi 47117044 sp O75581 I NA |
| 5654 | MMACDHYVDICLT  | gi 38372740 sp Q8NGP2 NA   |
| 5655 | RLTEADYLSSHLT  | gi 68566060 sp Q9BRJ7  NA  |
| 5656 | IFEKQEYVGGGLST | gi 2498310 sp Q12882 D NA  |
| 5657 | EEVATGYKNMYST  | gi 114223 sp P15848 AR NA  |
| 5658 | KYQDDAYSQCATT  | gi 25008957 sp Q9NQV5 NA   |
| 5659 | WKVKFDYVPTDTT  | gi 114152840 sp Q9Y6Xc NA  |
| 5660 | FNWEEAYPLPGVT  | gi 153217488 gb AAI512i NA |
| 5661 | PDDTEVYGDIKVT  | gi 117949771 sp O14522 NA  |
| 5662 | DMRELTYELNALQ  | gi 27923959 sp Q03001 I NA |
| 5663 | HADSNGYTNLPDV  | gi 29427834 sp Q8N4C8 NA   |
| 5664 | <<Marker>>     | control_spot NA            |
| 5665 | NRSAPVYKRIRDV  | gi 73620993 sp Q9Y2L1  NA  |
| 5666 | SLFEGIYTIKSDV  | gi 544320 sp P36888 FL NA  |
| 5667 | EEEEWLYGDENEV  | gi 119625850 gb EAX05c NA  |

|                     |                                                |
|---------------------|------------------------------------------------|
| 5668 ELKIEEYVQRGLQ  | gi 152125834 sp Q96FBf NA                      |
| 5669 GILKDYYTAALSG  | gi 109083810 ref XP_001 NA                     |
| 5670 YIDPSTYEDPCQA  | gi 6919882 sp O15197 E NA                      |
| 5671 KNRIAIYELLFKE  | gi 1173177 sp P46783 R: [KNRIAIYELLFKE Y 12 F  |
| 5672 IIRIPPYHYIHVL  | gi 21542417 sp Q14764 I [IIRIPPYHYIHVL Y 13 Q1 |
| 5673 NPETPGYVGFANL  | gi 2500769 sp Q15019 S [NPETPGYVGFANL Y 17     |
| 5674 QDLTDAYGPPSNF  | gi 50403807 sp Q9UMY4 [QDLTDAYGPPSNF Y 2:      |
| 5675 HAFKTIYAKEGGF  | gi 399538 sp P16260 GD NA                      |
| 5676 QPYEHGYPVSGGF  | gi 119585552 gb EAW65 NA                       |
| 5677 ALSVGGYEANPIF  | gi 52000845 sp Q9UL12  NA                      |
| 5678 ECCELPYSNYKKF  | gi 119628619 gb EAX08z NA                      |
| 5679 ILEEQVYLMIPKF  | gi 119607190 gb EAW86 NA                       |
| 5680 AVTSEAYVSGMLF  | gi 62901098 sp Q8NBJ9  NA                      |
| 5681 GNSELLYHNQTVF  | gi 20138730 sp Q9H293  NA                      |
| 5682 NTNMFITYEIAPVF | gi 1352216 sp Q05329 D NA                      |
| 5683 NVEEGLYSRTLGA  | gi 152125896 sp Q68CQ NA                       |
| 5684 DLYQETYIDDLGH  | gi 28202108 sp Q9NPG8 NA                       |
| 5685 <<Marker>>     | control_spot NA                                |
| 5686 FYVMTEYDCKGFH  | gi 30923328 sp Q92993  NA                      |
| 5687 IEEMLIYKDVEDM  | gi 126302544 sp O14772 NA                      |
| 5688 AVKEFGYHRYKFI  | gi 28372535 ref NP_777f NA                     |
| 5689 GTWMTCYVIVTEI  | gi 24212063 sp O75751 f NA                     |
| 5690 VLVDNGYENIDFI  | gi 61213003 sp Q8WXd NA                        |
| 5691 CISRPQYKTSCGI  | gi 62088204 dbj BAD925 NA                      |
| 5692 GSEEVCTVINHI   | gi 74741766 sp Q5JQS6  NA                      |
| 5693 TPNPEKYQESPGI  | gi 12643886 sp Q9UHI6  NA                      |
| 5694 VGSASIYKSDGQI  | gi 10092667 ref NP_062f NA                     |
| 5695 DLESEKYRRLGEM  | gi 17369329 sp Q9NYA1 NA                       |
| 5696 CPGEESYGCDDCG  | gi 11135560 sp O43309 z NA                     |
| 5697 PSHCTIYVAKNYP  | gi 48428689 sp Q9P2J5  NA                      |
| 5698 EIEDLPYLSTTEM  | gi 119581044 gb EAW60 NA                       |
| 5699 EYFRDLYHRVDVI  | gi 2501460 sp Q93009 U NA                      |
| 5700 FGRKAVYVIGDG   | gi 20455483 sp O00167 I NA                     |
| 5701 IASQIKYKQSAEM  | gi 19856971 sp P20929 f NA                     |
| 5702 INPDDLIVSVHGM  | gi 30173387 sp Q9NTZ6  NA                      |
| 5703 YYDCDKYKESYKK  | gi 94730445 sp P51523 z NA                     |
| 5704 PCNLDDYVWGQLK  | gi 10440287 dbj BAB156 NA                      |
| 5705 ATGCEEYAGHGQA  | gi 118572310 sp Q8IYT1 NA                      |
| 5706 <<Marker>>     | control_spot NA                                |
| 5707 RAFQDKYFMIGGM  | gi 22654242 sp O14653 f NA                     |
| 5708 LVHEDTYHMQQCL  | gi 119589109 gb EAW68 NA                       |
| 5709 WLFMEDYEVQDCL  | gi 74748090 sp Q5XPI4 f NA                     |
| 5710 LIDHNDYESGLDL  | gi 110832739 sp Q8WYF NA                       |
| 5711 EFKGESYSQNCFL  | gi 27735219 sp P49023 f NA                     |
| 5712 THHKETYTEIAGM  | gi 42558898 sp Q7Z7G8  NA                      |
| 5713 MLINTPYVTKDLL  | gi 118601083 sp Q13085 NA                      |
| 5714 VSSCNGYGRMGLL  | gi 116241368 sp Q12778 NA                      |
| 5715 MNRCLKYATMAFG  | gi 126302544 sp O14772 NA                      |
| 5716 NRSEKNYMELRLL  | gi 74729832 sp Q8NA47  NA                      |
| 5717 AKHGLHYVKNPML  | gi 126157490 ref NP_00f NA                     |
| 5718 IGQKDSYEHVLL   | gi 13124361 sp Q9UKN7 NA                       |
| 5719 FDKQPWYIDSTGG  | gi 51701343 sp Q8TDI0 f NA                     |

|                     |                                             |
|---------------------|---------------------------------------------|
| 5720 KEDKEIYSHMTCA  | gj 156139155 ref NP_007 NA                  |
| 5721 IPYNQSYDQNTGG  | gj 49036500 sp Q9Y6N7  NA                   |
| 5722 NDAKNLYAANGIG  | gj 74758318 sp Q6PD62  NA                   |
| 5723 RFPMPRYINTEHG  | gj 20141794 sp Q15437  NA                   |
| 5724 TRFEVKYQNVVHG  | gj 51702167 sp O95789  NA                   |
| 5725 DDPDAAYTTTGGK  | gj 19857975 sp P29322  NA                   |
| 5726 VASIEEYTEMMPA  | gj 547738 sp P35568 IR NA                   |
| 5727 <<Marker>>     | contol_spot NA                              |
| 5728 VEEPSIYESVRVH  | gj 51317293 sp Q9UN19  [VEEPSIYESVRVH Y 13  |
| 5729 VIENPQYFGITNS  | gj 2497560 sp Q16620 N [VIENPQYFGITNS Y 51  |
| 5730 DEEMTGYVATRWY  | gj 134047835 sp Q15759 NA                   |
| 5731 VSLLACYLKSQRQT | gj 59799763 sp Q13261  NA                   |
| 5732 ALDNPEYHNASNG  | gj 3913590 sp Q15303 E [ALDNPEYHNASNG Y 1   |
| 5733 GPARLEYENEEKK  | gj 547738 sp P35568 IR [GPARLEYENEEKK Y 4   |
| 5734 GSFESRYQQPFED  | gj 130225 sp P19174 PL [GSFESRYQQPFED Y 1   |
| 5735 HFPQFSYSASIRE  | gj 1170703 sp P31751 AI NA                  |
| 5736 IADGMAYLNAKKF  | gj 33112647 sp P06213  NA                   |
| 5737 IENPQYFSDACV   | gj 94730402 sp P04629 I [IENPQYFSDACV Y 49  |
| 5738 DIYETDYRKGK    | gj 33112647 sp P06213 I [DIYETDYRKGK Y 11   |
| 5739 ASSNPEYLSASDV  | gj 33112647 sp P06213 I [ASSNPEYLSASDV Y 9  |
| 5740 KTPSAAYLWVGTG  | gj 121116 sp P06396 GE NA                   |
| 5741 STPPSAYGSVKAY  | gj 113950 sp P07355 AN [STPPSAYGSVKAY Y 2   |
| 5742 WIENKLYGMSPDN  | gj 547807 sp P07949 RE [WIENKLYGMSPDN Y 1   |
| 5743 DMYDKEYYSVHNC  | gj 125484 sp P08581 ME [DMYDKEYYSVHNC Y 1   |
| 5744 KRKGHEYTNIKYS  | gj 84028248 sp Q06124 I [KRKGHEYTNIKYS Y 54 |
| 5745 SIESDIYAEIPDE  | gj 3183003 sp Q14289 F [SIESDIYAEIPDE Y 402 |
| 5746 PAVPSIYATLAIH  | gj 37537910 sp Q8NHL6 NA                    |
| 5747 PNNPCAYTPPSLK  | gj 23831292 sp Q9UD71 NA                    |
| 5748 <<Marker>>     | contol_spot NA                              |
| 5749 SQREAIEYEPETVY | gj 45382633 ref NP_9907 [SQREAIEYEPETVY Y 4 |
| 5750 AEQAERYDDMAAA  | gj 48428721 sp P61981 1 NA                  |
| 5751 EQLEPDYFKDMTP  | gj 8928283 sp O00559 R [EQLEPDYFKDMTP Y 9   |
| 5752 GARLGEYEDVSRV  | gj 3023518 sp Q99426 TI [GARLGEYEDVSRV Y 9  |
| 5753 DKDGNGYISAAEL  | gj 119609501 gb EAW89 [DKDGNGYISAAEL Y 10   |
| 5754 DRGRSDYDGIGSR  | gj 3023628 sp O00571 D [DRGRSDYDGIGSR Y 1   |
| 5755 GTFDNIYLHVQIS  | gj 74733509 sp Q9GZZ1 NA                    |
| 5756 NDRFANYIDKVERF | gj 55977767 sp P08670  NA                   |
| 5757 IKEKLCYVALDFE  | gj 89276723 gb ABD665 [IKEKLCYVALDFE Y 21   |
| 5758 TTPTKVYSEVHFT  | gj 48428650 sp Q8N3V7  NA                   |
| 5759 KAVKERYSYVCPD  | gj 47117647 sp P61158  NA                   |
| 5760 QVVESAYEVIKLK  | gj 126047 sp P00338 LDI [QVVESAYEVIKLK Y 23 |
| 5761 YGGYEEYSGLSDG  | gj 1710628 sp P52597 HI [YGGYEEYSGLSDG Y 2  |
| 5762 DTCRGHYNNVSCA  | gj 1705996 sp P53621 C NA                   |
| 5763 EGYELPYNPATDD  | gj 17366642 sp Q99704 I [EGYELPYNPATDD Y 4  |
| 5764 RDNNKCYAKIICN  | gj 50403780 sp Q16881  NA                   |
| 5765 TYDEIFYTLSPVN  | gj 18202945 sp Q9H4M9 [TYDEIFYTLSPVN Y 45   |
| 5766 RISEQTYQLSRWT  | gj 50403646 sp P61764  [RISEQTYQLSRWT Y 4   |
| 5767 ETQKSIYYITGES  | gj 17865718 sp P08238  NA                   |
| 5768 SERDELYAQWGKG  | gj 74732865 sp Q9BRD0 [SERDELYAQWGKG Y      |
| 5769 <<Marker>>     | contol_spot NA                              |
| 5770 YGRSRDYNGRNQG  | gj 1710620 sp P98179 R NA                   |
| 5771 QQWQQLYDTLNAW  | gj 62896687 dbj BAD962 NA                   |

|      |               |                                             |
|------|---------------|---------------------------------------------|
| 5772 | MDPSDIYAVIQIP | gi 23396534 sp Q9NUD5 MDPSDIYAVIQIP Y 202   |
| 5773 | PIIVGDYGPWVY  | gi 12643956 sp Q9Y5X1 NA                    |
| 5774 | KLVQTTYECLMQA | gi 33302602 sp P53582 NA                    |
| 5775 | QIIQEIYSQIQSK | gi 1729976 sp P29401 T QIIQEIYSQIQSK Y 275  |
| 5776 | STPMFEYENLEDN | gi 121066 sp P03069 GC NA                   |
| 5777 | PGVNDSYLYAGLW | gi 731532 sp P39956 RP NA                   |
| 5778 | IAEQPFYVNAKQY | gi 122217 sp P06774 HA NA                   |
| 5779 | PKSASEYVNHNE  | gi 1168370 sp P22149 AI NA                  |
| 5780 | DMINPDYAQPTNG | gi 129733 sp P12383 PD NA                   |
| 5781 | LHREETYGSLTFE | gi 1708905 sp P53338 M NA                   |
| 5782 | DLAEKYSESSEK  | gi 74645031 sp Q12180 I NA                  |
| 5783 | APFESSYTTASTF | gi 729140 sp P40917 YA NA                   |
| 5784 | YSATDQYSDSSFP | gi 74655046 sp Q12398 I NA                  |
| 5785 | LNDEDNYSSAISR | gi 1168610 sp P41696 A; NA                  |
| 5786 | NNSHVTYENANHA | gi 2506540 sp P20134 SI NA                  |
| 5787 | VMSEFKYNFNSPL | gi 74583758 sp Q08887 I NA                  |
| 5788 | CTTPNKYVVVDAA | gi 67461085 sp Q9UJG1 NA                    |
| 5789 | IGEENKYAEQIMM | gi 38505226 ref NP_078; NA                  |
| 5790 | <<Marker>>    | contol_spot NA                              |
| 5791 | LIPKWLYEDIPNM | gi 119371147 sp Q5VWk NA                    |
| 5792 | RESSSIYISKYLM | gi 6175086 sp O60701 U NA                   |
| 5793 | TEFNAAVPPGLM  | gi 119621086 gb EAX00; NA                   |
| 5794 | AEDPDDYDDGFSM | gi 61247587 sp Q969G3 NA                    |
| 5795 | KAQCDEYCIQGDN | gi 12643419 sp P22079 F NA                  |
| 5796 | LFSASKYSFINDN | gi 50541963 ref NP_001; NA                  |
| 5797 | RHYEDGYPGGSDN | gi 14916543 sp O60716 ; [RHYEDGYPGGSDN Y ;2 |
| 5798 | SFSNVKYVMLEEN | gi 6226957 sp Q13635 P NA                   |
| 5799 | VISWSHYKVAEN  | gi 88943889 sp Q70EK8 NA                    |
| 5800 | AVSGDYYPPIYFN | gi 74735596 sp O96005 ; NA                  |
| 5801 | LMTGDTYTAHAGA | gi 1168268 sp P42684 AI [LMTGDTYTAHAGA Y 3  |
| 5802 | LPLDKDYVVREP  | gi 50403745 sp P52333 ; [LPLDKDYVVREP Y 98  |
| 5803 | LRADENYYKAQTH | gi 1174527 sp P43405 K; [LRADENYYKAQTH Y 5; |
| 5804 | MEDSTYYKASKGK | gi 3183518 sp Q05397 F; [MEDSTYYKASKGK Y 6  |
| 5805 | MPSTRDYEIQRER | gi 3183518 sp Q05397 F; NA                  |
| 5806 | NANYTEYVATRWW | gi 6175070 sp O76039 C NA                   |
| 5807 | YIWEFKYLFVQRN | gi 149588695 ref NP_00; NA                  |
| 5808 | IGVRESYVNLCSN | gi 14917099 sp Q93034 ; NA                  |
| 5809 | TYSSDTYYYPGSN | gi 114677592 ref XP_52; NA                  |
| 5810 | DDMSCDYDNMAVN | gi 74738165 sp Q6UX15 NA                    |
| 5811 | KAEVEKYKDCDPQ | gi 14149769 ref NP_115; NA                  |
| 5812 | LPVNPEYSSTRNQ | gi 17376322 sp Q14161 ; NA                  |
| 5813 | LQEEDFYILDQGG | gi 61252134 sp O15195 ; NA                  |
| 5814 | KFGCSQYECVPRQ | gi 20178043 sp O95980 I NA                  |
| 5815 | VALEESYPDLKSQ | gi 119630592 gb EAX10; NA                   |
| 5816 | EFDNPIYETGGTQ | gi 4456459 emb CAB374 NA                    |
| 5817 | KEEKCTYADKYTQ | gi 119600756 gb EAW80 NA                    |
| 5818 | YSSGSRYSAPSQ  | gi 148746220 ref NP_07; NA                  |
| 5819 | LRPGPIYAEDGDR | gi 45477168 sp Q9HBB8 NA                    |
| 5820 | PPQRDSYSRSGCR | gi 74754395 sp O75526 I NA                  |
| 5821 | SARIPEYLDVTAR | gi 119621930 gb EAX01; NA                   |
| 5822 | SPIKVKYGDVYCR | gi 2498958 sp P78539 SI NA                  |
| 5823 | DGPAVDYENQDVA | gi 62511238 sp Q9UGK3 NA                    |

|      |                |                         |    |
|------|----------------|-------------------------|----|
| 5824 | FSSTESYLQALDR  | gj 119588453 gb EAW68   | NA |
| 5825 | RCSSEIYSSICGR  | gj 119569481 gb EAW49   | NA |
| 5826 | AMMETLYSDPHHR  | gj 74737212 sp Q6P2H3   | NA |
| 5827 | EGADVSYTNHRGR  | gj 68565531 sp Q96AX9   | NA |
| 5828 | LHSDSEYIKLMHR  | gj 114520607 ref NP_94  | NA |
| 5829 | SLLETQYQNVGR   | gj 25008833 sp Q93015   | NA |
| 5830 | AFPEHLYQRVKIR  | gj 3122031 sp Q14194    | NA |
| 5831 | VGDVDDYSLHGGC  | gj 32129516 sp Q9NXG6   | NA |
| 5832 | FAVDTAYVAKKLG  | gj 94730680 sp O95070   | NA |
| 5833 | LNVKVNVDNVGLG  | gj 44889019 sp P35499   | NA |
| 5834 | PAPEECYVYSPLG  | gj 119575321 gb EAW54   | NA |
| 5835 | KCSSEMYESSRTL  | gj 26006702 sp Q96A23   | NA |
| 5836 | IEEFDNYAEWDLR  | gj 13431275 sp O75478   | NA |
| 5837 | DPNKYRYIDDGVR  | gj 89060481 ref XP_2921 | NA |
| 5838 | KEAPTEYASICVR  | gj 71152346 sp Q7Z6A9   | NA |
| 5839 | MKSTESYFIPEVR  | gj 129747 sp P16284     | NA |
| 5840 | RGRKGTYWEGGVR  | gj 74722581 sp Q5FYB1   | NA |
| 5841 | FASPEEYAEFQYR  | gj 146325086 sp Q9P2G   | NA |
| 5842 | KPAEPWYKETTYR  | gj 74743878 sp Q5SVJ3   | NA |
| 5843 | PKVPESYVETSAS  | gj 108935982 sp Q96RQ   | NA |
| 5844 | CSPDTIYEDCDCS  | gj 51315819 sp O94989   | NA |
| 5845 | DHHENKYCDLECS  | gj 2499596 sp Q16659    | NA |
| 5846 | FHDVQDYADSSCS  | gj 10834712 gb AAG237   | NA |
| 5847 | GIPDDYLCSLCS   | gj 20306246 gb AAH285   | NA |
| 5848 | KAREEMYEKYVAS  | gj 73920251 sp Q8WXW    | NA |
| 5849 | GTAEPDYGALYEG  | gj 130225 sp P19174     | NA |
| 5850 | RSTSSPYHAGNLL  | gj 118572719 sp Q9H79   | NA |
| 5851 | VICSDCYDNANIY  | gj 54036167 sp O94898   | NA |
| 5852 | YEVEVTYDGVVVP  | gj 116241365 sp P21333  | NA |
| 5853 | SKGEPQYSSHSSS  | gj 92058729 sp O60292   | NA |
| 5854 | VKLQQTYAALNSK  | gj 1170586 sp P46940    | NA |
| 5855 | SNLAASYLNPVKS  | gj 23396625 sp Q9NQT8   | NA |
| 5856 | RRGEEIYGTISMK  | gj 88983969 sp Q9NR22   | NA |
| 5857 | KTDDDVYVNVPEL  | gj 23813679 sp O96024   | NA |
| 5858 | GDEDCLYLNIVVP  | gj 231629 sp P19835     | NA |
| 5859 | EDRFIQYANPAFE  | gj 23503044 sp O60658   | NA |
| 5860 | GPNNNNYANVELI  | gj 118601083 sp Q13085  | NA |
| 5861 | DDTAKMYVPMTED  | gj 3183202 sp O14975    | NA |
| 5862 | VHLRAGYIPLQG   | gj 126590 sp P10253     | NA |
| 5863 | IAKHLTYENVERW  | gj 50402542 sp P62491   | NA |
| 5864 | KVNENKYENVDLL  | gj 78099770 sp Q9NSV4   | NA |
| 5865 | ESLVLTYVNAISS  | gj 417031 sp P32455     | NA |
| 5866 | SGGLELYGEPRHT  | gj 14194461 sp Q99996   | NA |
| 5867 | SLILMAYIIIFLT  | gj 3122160 sp O15552    | NA |
| 5868 | RVGTVGYMAPEVV  | gj 143811400 sp P32298  | NA |
| 5869 | DKLVVEYANAICQ  | gj 123504 sp P08910     | NA |
| 5870 | ASSNPEYLSASDV  | gj 33112647 sp P06213   | NA |
| 5871 | SQGVDTYVEMRPV  | gj 547770 sp P07333     | NA |
| 5872 | HAEAAALYKNLLHS | gj 125472 sp P10721     | NA |
| 5873 | LEFNDVYQEVKGS  | gj 730840 sp Q08945     | NA |
| 5874 | PQYYDEYVTFNGS  | gj 93141229 sp Q6UB98   | NA |
| 5875 | DSMEEKYCGCNKC  | gj 10720377 sp Q9UL59   | NA |

|      |                |                                             |
|------|----------------|---------------------------------------------|
| 5876 | FPSSWDYKRASLC  | gj 488364 emb CAA5478 NA                    |
| 5877 | KKPWTEYVDMTLC  | gj 145566894 sp Q9UHE NA                    |
| 5878 | LVLEGGYENWLLC  | gj 731046 sp P40818 UB NA                   |
| 5879 | VVESSKYAACPKS  | gj 148667492 gb EDK99 NA                    |
| 5880 | ESSTSPYVTSYKS  | gj 74749380 sp Q6UW4 NA                     |
| 5881 | KKVEDEYKAFYKS  | gj 119360 sp P14625 EN NA                   |
| 5882 | VKKEITYQNTDLS  | gj 114149995 sp Q32MZ NA                    |
| 5883 | CGKKRRYVRLGLS  | gj 94730574 sp Q5MJ70  NA                   |
| 5884 | KISEIHYGDTLLS  | gj 74728160 sp Q8IWA6  NA                   |
| 5885 | ESPGIDYVQIGFP  | gj 6094289 sp O14893 G NA                   |
| 5886 | IAKMDSYARIFFP  | gj 116242488 sp P18507 NA                   |
| 5887 | RSVNDLYIQKQFP  | gj 123055 sp P05546 HE NA                   |
| 5888 | AHRDSLIVVRNGP  | gj 41205052 ref XP_372 NA                   |
| 5889 | SICLERYKNPKVL  | gj 21363034 sp Q9C040  NA                   |
| 5890 | TTEELKYSPEGLV  | gj 119590617 gb EAW70 NA                    |
| 5891 | GWVEQAYVDKCVC  | gj 4140704 gb AAD0417 NA                    |
| 5892 | EKDNNTYENRRVL  | gj 93004094 ref NP_005 NA                   |
| 5893 | VEKPLDYMNHYTC  | gj 91208389 sp Q2M3W NA                     |
| 5894 | FCFSEDYPNGTWT  | gj 109698609 ref NP_52 NA                   |
| 5895 | FDSKKAYRDVAWL  | gj 38258608 sp Q8IXJ6 NA                    |
| 5896 | DEDMLKYMKMTAT  | gj 147668009 sp Q8N6K NA                    |
| 5897 | EPLPPSYVACS    | gj 119524 sp P19235 EP [EPLPPSYVACS Y 504 F |
| 5898 | IRNTNEYTEGPTV  | gj 13124551 sp O43597  [IRNTNEYTEGPTV Y 55  |
| 5899 | PGPQDIYDVPVVR  | gj 8134339 sp P56945 B [PGPQDIYDVPVVR Y 24  |
| 5900 | QIPEGDYLSTYREF | gj 116242614 sp Q96RT [QIPEGDYLSTYREF Y 11  |
| 5901 | RNPLQGYQVRRP   | gj 46576866 sp O94910  [RNPLQGYQVRRP Y 1    |
| 5902 | SHVDNEYSQPPRN  | gj 116024 sp P06127 CD [SHVDNEYSQPPRN Y 4   |
| 5903 | AFDNPDYWNHSLP  | gj 3913590 sp Q15303 E [AFDNPDYWNHSLP Y 1   |
| 5904 | GLARDMYDKEYYS  | gj 125484 sp P08581 ME [GLARDMYDKEYYS Y 1   |
| 5905 | KPEIQVYENIHLA  | gj 56206384 emb CA118 [KPEIQVYENIHLA Y 281  |
| 5906 | TEDELPYDDCVFG  | gj 126682 sp P25963 IKE [TEDELPYDDCVFG Y 30 |
| 5907 | DDSDEYKVPPLP   | gj 3023207 sp P78314 3E NA                  |
| 5908 | GNYRDNYDN      | gj 1710620 sp P98179 RI [GNYRDNYDN Y 155 P9 |
| 5909 | GADDSYYTARSAG  | gj 1177044 sp P43403 Z [GADDSYYTARSAG Y 4   |
| 5910 | HQEDNDYINASLI  | gj 131467 sp P18031 PTI [HQEDNDYINASLI Y 66 |
| 5911 | NEGKHLTYLDGGD  | gj 54037168 sp P63244 C [NEGKHLTYLDGGD Y 2  |
| 5912 | PMDTEVYESPYAD  | gj 1174527 sp P43405 K [PMDTEVYESPYAD Y 3   |
| 5913 | FLPVPEYINQSVP  | gj 2811086 sp P00533 E [FLPVPEYINQSVP Y 10  |
| 5914 | RNMKSQYEVFRSS  | gj 73917693 sp Q63HQ0 NA                    |
| 5915 | ISQGMQYLAEMKL  | gj 547807 sp P07949 RE NA                   |
| 5916 | QIDSCTYEAMYNI  | gj 115855 sp P22681 CB [QIDSCTYEAMYNI Y 73  |
| 5917 | SRLPVDYYGIPFA  | gj 74745207 sp Q5T6F2  [SRLPVDYYGIPFA Y 83  |
| 5918 | AVLYADYRAPGPA  | gj 54036152 sp Q96J84 I [AVLYADYRAPGPA Y 62 |
| 5919 | EEPEALYAAVNKK  | gj 20138768 sp Q9NZM3 [EEPEALYAAVNKK Y 96   |
| 5920 | HSTILDYINVVPT  | gj 118572721 sp Q96LC7 [HSTILDYINVVPT Y 597 |
| 5921 | EADGELYVFNTPS  | gj 90180201 sp Q13480 C [EADGELYVFNTPS Y 28 |
| 5922 | FCGTPEYLAPEVL  | gj 57210108 emb CA142 [FCGTPEYLAPEVL Y 31   |
| 5923 | HIANHSYLPLSYW  | gj 730980 sp P40238 TP [HIANHSYLPLSYW Y 62  |
| 5924 | PDEYEMNRQRD    | gj 119534 sp P21860 ER [PDEYEMNRQRD Y 1     |
| 5925 | RPPEPVYSTVNKL  | gj 73920200 sp Q15700 I [RPPEPVYSTVNKL Y 34 |
| 5926 | SPGPGHYLRCDST  | gj 729564 sp Q99062 CS [SPGPGHYLRCDST Y 7   |
| 5927 | SPSDSGYSYETIG  | gj 1170875 sp P46821 M NA                   |

|      |                |                                            |
|------|----------------|--------------------------------------------|
| 5928 | LNKTKEYTACELM  | gj 12643818 sp Q9NSD9 NA                   |
| 5929 | KPSSAAYQKAPTK  | gj 464745 sp P34741 SD NA                  |
| 5930 | NEELPTYEEAKAQ  | gj 74728292 sp Q8IY63 / NA                 |
| 5931 | SDVGGYEEKIER   | gj 1170875 sp P46821 M NA                  |
| 5932 | AEQAERYEDMAAF  | gj 398953 sp P31947 14: [AEQAERYEDMAAF Y 1 |
| 5933 | DRKNPAYIPRKGL  | gj 18266743 sp O15234  NA                  |
| 5934 | IEWPGAYPKLMEI  | gj 30923321 sp Q92556 I NA                 |
| 5935 | DFTSPYDSDLK    | gj 145559526 sp O94885 NA                  |
| 5936 | LLTMSFYRNYHAM  | gj 13124441 sp O14939 I NA                 |
| 5937 | LGLALNYSVFYEE  | gj 48428721 sp P61981 1 NA                 |
| 5938 | VRWAKLYSLVIWG  | gj 2506481 sp P30411 BI [VRWAKLYSLVIWG Y 1 |
| 5939 | DEIRKKYGLFKEE  | gj 1711387 sp P53801 P NA                  |
| 5940 | GRDEGNYLDDALV  | gj 1703319 sp P09525 AI NA                 |
| 5941 | SDKELQYIDAISN  | gj 73917636 sp Q9UQB8 NA                   |
| 5942 | RRQEEGYYSRLEA  | gj 12644018 sp P55196 / NA                 |
| 5943 | DLSSKYQTIGNH   | gj 20978558 sp Q9UNM NA                    |
| 5944 | EDSDRKYEEVARK  | gj 136090 sp P07951 TP NA                  |
| 5945 | CKAANLYASSPHS  | gj 119607309 gb EAW86 NA                   |
| 5946 | LLSNPDYINQMLL  | gj 119613823 gb EAW93 NA                   |
| 5947 | ATSYIAYLMDLLA  | gj 47117699 sp P61296  NA                  |
| 5948 | LVGEGSYGMVMKC  | gj 74762639 sp Q92772  NA                  |
| 5949 | VEFEPTYEEFPSL  | gj 10720350 sp Q9Y487  NA                  |
| 5950 | RPGYGAYDAFKHA  | gj 124200 sp P05198 IF2 NA                 |
| 5951 | SAVGFDYKGEVEK  | gj 123557 sp P14317 HC NA                  |
| 5952 | RNVNAPYRDR IPL | gj 13633994 sp Q9UBN4 NA                   |
| 5953 | TRFTDEYQLYEDI  | gj 12643413 sp Q13554 I NA                 |
| 5954 | GEARALYNLGNVY  | gj 38258887 sp P81274  NA                  |
| 5955 | RCPSPDYKHSLPS  | gj 14285603 sp Q12879 I NA                 |
| 5956 | PKSENIYDYLDSS  | gj 125987727 sp Q58A6: NA                  |
| 5957 | DGASPDYVLVEAE  | gj 416959 sp Q03468 ER NA                  |
| 5958 | GSLSGDYLYIFDG  | gj 73920246 sp O00750 I NA                 |
| 5959 | LRNQPIYIQYSNH  | gj 74761983 sp Q9UKA9 NA                   |
| 5960 | TLESAQYPGILPS  | gj 1169233 sp P43146 D NA                  |
| 5961 | LCEFRPYSCPCPG  | gj 46577493 sp Q8IUQ4  NA                  |
| 5962 | IPNVVKYSPNCKL  | gj 126047 sp P00338 LD NA                  |
| 5963 | SYSGVLYITETDE  | gj 118573058 sp Q9P27: NA                  |
| 5964 | IDNKALYDTFSAF  | gj 3183544 sp P11940 P NA                  |
| 5965 | VKMKMKYIEYME   | gj 67461014 sp Q6NYC1 NA                   |
| 5966 | RYHLRCYMYQARD  | gj 20137708 sp O75923 I NA                 |
| 5967 | ELDEEGYMTPMRD  | gj 3913590 sp Q15303 E NA                  |
| 5968 | EPKGEKYECALKR  | gj 93141033 ref NP_031: NA                 |
| 5969 | RMNDLHYLNLDTW  | gj 90110030 sp Q8N7A1  NA                  |
| 5970 | FDEVEIYGEPQTV  | gj 20139241 sp Q9NZM1 NA                   |
| 5971 | RLTGITYLRVRS   | gj 3914299 sp O60683 P NA                  |
| 5972 | QTDFVQYQPDLD   | gj 21362912 sp O15079 : NA                 |
| 5973 | RDVARGYENVPIP  | gj 116241348 sp Q96KQ NA                   |
| 5974 | QLIELDYLNPGSI  | gj 12643886 sp Q9UHI6  NA                  |
| 5975 | THTIPFYPNPLHP  | gj 13124249 sp Q9Y3I1 F NA                 |
| 5976 | YCSKLRYLNARGC  | gj 37537858 sp Q9UJT9  NA                  |
| 5977 | YQVPASYQPDEEE  | gj 17865680 sp Q9BYM8 NA                   |
| 5978 | YSRDPNYLNLFI   | gj 6648106 sp Q05086 U NA                  |
| 5979 | NITENVYINLTCS  | gj 1168851 sp P42081 C NA                  |

|      |               |                         |                     |
|------|---------------|-------------------------|---------------------|
| 5980 | HSVNGEYLNVHMK | gi 90110033 sp Q16363 I | NA                  |
| 5981 | YKLLPPYLRVIQG | gi 1172027 sp P43490 N  | NA                  |
| 5982 | FHPNKGYYVVKV  | gi 73920246 sp O00750 I | NA                  |
| 5983 | VDDFQNYLRVAFQ | gi 28201876 sp Q8WYP3   | NA                  |
| 5984 | YENDLGYTAVALY | gi 2498954 sp Q14247 S  | NA                  |
| 5985 | DAEKPFYVNVEFH | gi 143811366 sp P11274  | [DAEKPFYVNVEFH Y 17 |
| 5986 | TDGYTTYINASTC | gi 3023214 sp Q15777 M  | NA                  |
| 5987 | VKGFRSYVDMYLK | gi 13959709 sp P11388 T | NA                  |
| 5988 | IVNSTYYANVSAT | gi 13634020 sp Q9UPW6   | NA                  |
| 5989 | ILFVKEYVNASEV | gi 14286186 sp O15231 ; | NA                  |
| 5990 | DNSPKRYLIPKGD | gi 83305815 sp P31629 z | NA                  |
| 5991 | GVEAKNYEEIAKV | gi 3915893 sp P49755 T  | NA                  |
| 5992 | KFTSKEYEIDKR  | gi 30316395 sp Q9Y2G3   | NA                  |
| 5993 | MGFIGHYLDQKRL | gi 116241237 sp P53396  | NA                  |
| 5994 | PHVVKVYSEDGAC | gi 116242503 sp Q14451  | NA                  |
| 5995 | DSPVFWYAPECLK | gi 56405328 sp P29597 T | NA                  |
| 5996 | APRDTIYQVPPSY | gi 8134360 sp Q14511 C  | NA                  |
| 5997 | NWAKGHYTEGAEL | gi 146424310 gb AAI419  | NA                  |
| 5998 | EERLLRYLIHLRF | gi 154350236 ref NP_06z | NA                  |
| 5999 | F4:17         | contol_spot             | NA                  |
| 6000 | F8:17         | contol_spot             | NA                  |
| 6001 | pY            | contol_spot             | NA                  |
| 6002 | IgG           | contol_spot             | NA                  |
| 6003 | FITC          | contol_spot             | NA                  |
| 6004 | pY            | contol_spot             | NA                  |
| 6005 | IgG           | contol_spot             | NA                  |
| 6006 | FITC          | contol_spot             | NA                  |
| 6007 | GICEEAYSWNLTV | gi 11136143 sp Q9Y2L8 ; | NA                  |
| 6008 | MMEEIDYDHDGTV | gi 12643960 sp Q9Y6T7   | NA                  |
| 6009 | IAECLTYLDNGVV | gi 12643730 sp Q16531 I | NA                  |
| 6010 | WKPEREYWESGLQ | gi 119619475 gb EAW99   | NA                  |
| 6011 | RHLEGAYADWDVV | gi 5915798 sp O75936 B  | NA                  |
| 6012 | VVLEEHLVVGVV  | gi 32700084 sp Q14689 I | NA                  |
| 6013 | GARGDHYARNLLW | gi 47116570 sp Q96RP7   | NA                  |
| 6014 | IQPSTVYVCNENQ | gi 82654940 sp Q9Y5Y3   | NA                  |
| 6015 | KQKYDLYISIAGW | gi 21263618 sp Q9BXC1   | NA                  |
| 6016 | NLLEEDYFGLAIW | gi 90101808 sp P11171 z | NA                  |
| 6017 | QPSKQKYIFLLLW | gi 74762064 sp Q9Y546   | NA                  |
| 6018 | CKPKSVYENFRLW | gi 74747838 sp Q5VZR2   | NA                  |
| 6019 | QRTDFPYVSAAMP | gi 123283730 emb CAMz   | NA                  |
| 6020 | DNEEGVYDYENTG | gi 84028206 sp P20930 F | NA                  |
| 6021 | SANWTEYQDPRTG | gi 2506380 sp Q08431 M  | NA                  |
| 6022 | RNPDHDTGNKNQ  | gi 29611340 gb AAO918   | NA                  |
| 6023 | SPAEEFYTRHVLQ | gi 400630 sp P31645 SC  | NA                  |
| 6024 | RGSAGAYADFLPP | gi 113428577 ref XP_94z | NA                  |
| 6025 | ISSEFTYAWSVED | gi 730891 sp P40200 TA  | NA                  |
| 6026 | MYYNDAYGALDYY | gi 62511129 sp Q9BQ04   | NA                  |
| 6027 | FDVRDHYKDFGGD | gi 59802987 sp O75153 I | NA                  |
| 6028 | IFEKDRYSGENGD | gi 20138033 sp Q9NQ10   | NA                  |
| 6029 | IPASGDYVARPGD | gi 74731608 sp Q96ES7   | NA                  |
| 6030 | VRYSFRYVDDKAA | gi 37999478 sp O60330 I | NA                  |
| 6031 | SSWDEHYSRGYRD | gi 27805715 sp Q15380 I | NA                  |



|                    |                            |
|--------------------|----------------------------|
| 6032 DKRSPLYDISATD | gi 2493600 sp Q15842 IF NA |
| 6033 NNVEEGYPRPVSD | gi 21264469 sp Q9ULZ9  NA  |
| 6034 ILFKEWYSMSAVD | gi 145558936 sp Q0D2K  NA  |
| 6035 QNSKFSYEQLETD | gi 145559478 sp Q14789  NA |
| 6036 EFGKLYVHVTVD  | gi 332129 gb AAA46542. NA  |
| 6037 CQASPRYLQPGGE | gi 74752049 sp Q96N96  NA  |
| 6038 GKDEIVYPRMPGE | gi 118918431 ref NP_00  NA |
| 6039 MWDFDIYGDLYFE | gi 20140440 sp O75140 I NA |
| 6040 FHYETKYVLSYL  | gi 23396740 sp Q9BXX5 NA   |
| 6041 KKRMYYDSEHHE  | gi 23831324 sp O43252 I NA |
| 6042 TRRELYAVIDIE  | gi 71152057 sp Q8WU2C  NA  |
| 6043 <<Marker>>    | contol_spot NA             |
| 6044 IKAMTYYGNDLSE | gi 89365949 gb AAI1447  NA |
| 6045 YKFMDLYPCSASE | gi 71153231 sp Q12996  NA  |
| 6046 LSSMTAYVSGGSP | gi 150421552 sp Q12951  NA |
| 6047 HEADGYDYTVSP  | gi 74738627 sp Q7LC44  NA  |
| 6048 NKCSTGYEKNMTP | gi 1709214 sp P49790 N  NA |
| 6049 DRDKDMYAGNCAH | gi 67462124 sp O95841  NA  |
| 6050 RGDTDKYLKLLHT | gi 17390940 gb AAH183  NA  |
| 6051 FISVTSYQNHKIT | gi 51338786 sp P57082  NA  |
| 6052 GPCGWKYENIYIT | gi 71153342 sp Q9H295  NA  |
| 6053 PLPMDSYMHLEIT | gi 47606649 sp Q8NFA0  NA  |
| 6054 STPEEIYPPYNIT | gi 91207975 sp O75445 I NA |
| 6055 CYDDSVYWKVPKT | gi 548729 sp Q02094 RH NA  |
| 6056 TGDMPYQIRAPT  | gi 146345406 sp Q03060  NA |
| 6057 KPPEITYMSQGPT | gi 74730279 sp Q8NEP4  NA  |
| 6058 WLEEAVYEDFPQT | gi 119370527 sp Q9BQF  NA  |
| 6059 RPQEEKYPVGPWL | gi 74751068 sp Q8N6R1  NA  |
| 6060 QVENDAYPGTDRT | gi 45477317 sp Q8N302  NA  |
| 6061 CNGTDIYKDKEST | gi 115985 sp P04234 CD NA  |
| 6062 RITEDYYVHLIAD | gi 13878804 sp Q92544  NA  |
| 6063 KISKVKYVIWSAD | gi 1705996 sp P53621 C  NA |
| 6064 <<Marker>>    | contol_spot NA             |
| 6065 RRSVEKYNSARAD | gi 122063473 sp O14526  NA |
| 6066 FCSSSGYIQEKCV | gi 118574152 sp Q9C0I4  NA |
| 6067 HDPNGEYMFMRV  | gi 50400701 sp Q9Y6W8  NA  |
| 6068 QKSLPIYIQMACV | gi 11094327 gb AAG295  NA  |
| 6069 DVMLENYENVAKV | gi 97219157 sp Q96MR9  NA  |
| 6070 KLSKLDYRDITKQ | gi 71153483 sp Q14966  NA  |
| 6071 PIEESFYIFFAKV | gi 119585682 gb EAW65  NA  |
| 6072 SAKPLDYVEIHKV | gi 130321 sp P16471 PR NA  |
| 6073 GQSEGSYLLHHL  | gi 74749590 sp Q6ZP29  NA  |
| 6074 YGGSDDYIGLALP | gi 119576383 gb EAW55  NA  |
| 6075 LKLEDIYGCPYDF | gi 119569691 gb EAW49  NA  |
| 6076 YCKEKIYAGVGEF | gi 143811368 sp O60566  NA |
| 6077 ILVNEPYNEAGF  | gi 134035341 sp Q9C0C  NA  |
| 6078 KLTALDYHNPAGF | gi 20138086 sp Q9Y224  NA  |
| 6079 PVSSEYDRTDGF  | gi 116248529 sp Q5VUJ  NA  |
| 6080 YQEEKCYEDGIF  | gi 46395756 sp Q7Z7M0  NA  |
| 6081 FETNNKYEIKNSF | gi 14548191 sp O15162 I NA |
| 6082 LDLEEDYNVMTSF | gi 74738329 sp Q6ZUJ4  NA  |
| 6083 YQRTPYACPQSF  | gi 114152782 sp Q9BXF  NA  |

|      |               |                         |                     |
|------|---------------|-------------------------|---------------------|
| 6084 | AGSSDKYFFVETF | gj 154089854 emb CAOε   | NA                  |
| 6085 | <<Marker>>    | control_spot            | NA                  |
| 6086 | ILKDHGYIENLTF | gj 12229715 sp Q9NVD3   | NA                  |
| 6087 | MENNLPYDDNGTF | gj 113413918 ref XP_94  | NA                  |
| 6088 | DGEMAKYVQGDAI | gj 1170636 sp P23743 D  | NA                  |
| 6089 | LTFKDQYIGRGDM | gj 20140440 sp O75140 I | NA                  |
| 6090 | AIPGLDYVSHEDI | gj 50401206 sp Q9Y2S7   | NA                  |
| 6091 | ITFSWKYKNNSDI | gj 148717943 gb AAV40   | NA                  |
| 6092 | RTPDELYFEEGDI | gj 108885279 sp Q92882  | NA                  |
| 6093 | GERNQIYIQLPEI | gj 82802803 gb ABB924   | NA                  |
| 6094 | GDWMIDYVSNRLI | gj 116242491 sp P35573  | NA                  |
| 6095 | YCIKEGYADKNLI | gj 23831082 sp P41223 E | NA                  |
| 6096 | ISSIPLYVQVLNI | gj 17366818 sp Q9H159   | NA                  |
| 6097 | DLDHPGYNNTYQI | gj 6166014 sp O76083 P  | NA                  |
| 6098 | IAEELGYDLLGQI | gj 116242674 sp P29120  | NA                  |
| 6099 | NNDEKFYLSNGRI | gj 110611231 ref NP_00  | NA                  |
| 6100 | VENLEKYVVKDGK | gj 1703012 sp P49902 5  | NA                  |
| 6101 | AQEMFTYICNHIK | gj 266648 sp P29474 NO  | NA                  |
| 6102 | IWDCEEYNMIKIK | gj 126215680 sp Q96MC   | NA                  |
| 6103 | YIHEHEYVHGDIK | gj 45593726 sp Q99986   | NA                  |
| 6104 | DYEFIDYECLAKK | gj 51094632 gb EAL238   | NA                  |
| 6105 | SDEDQGYVDLVIK | gj 74761957 sp Q9UHQ    | NA                  |
| 6106 | <<Marker>>    | control_spot            | NA                  |
| 6107 | AYLNVDYVMNYWK | gj 37999771 sp Q9BZP6   | NA                  |
| 6108 | PRSATTYITVLVK | gj 22095551 sp Q9NYQ6   | NA                  |
| 6109 | PADGENYVTMVEM | gj 119610537 gb EAW90   | NA                  |
| 6110 | FVWMHYYVSMDAL | gj 401235 sp P14679 TY  | NA                  |
| 6111 | PHKERPYTIAAAL | gj 116268127 ref NP_68  | NA                  |
| 6112 | DWYHFHYVDILAL | gj 116242784 sp P51172  | NA                  |
| 6113 | CVSCLDYDEHYIL | gj 20139075 sp Q96SU4   | NA                  |
| 6114 | YTSKDRYFYFGKL | gj 152031723 sp Q96DA   | NA                  |
| 6115 | HVCNVKYKRWALL | gj 119604152 gb EAW83   | NA                  |
| 6116 | LFSPGTYERLALL | gj 17380172 sp Q9H1Y3   | NA                  |
| 6117 | DGSEVMYDAVSIM | gj 61563951 sp Q6PI25 C | NA                  |
| 6118 | EKFCDLYWDEKLL | gj 119581720 gb EAW61   | NA                  |
| 6119 | SFSDPLYLTMFKM | gj 38258919 sp P42356 F | NA                  |
| 6120 | VDHRGDYVSHEIM | gj 32363141 sp Q8TE57   | NA                  |
| 6121 | VSREAGYDSTYGM | gj 116242695 sp Q9HC1   | NA                  |
| 6122 | ISEAEDYKMFICA | gj 74761374 sp Q9H069   | NA                  |
| 6123 | CDNFPYYKNAGIG | gj 13626933 sp Q9P0K8   | NA                  |
| 6124 | DQEEKKYLMEHG  | gj 10720176 sp O15297 I | NA                  |
| 6125 | SDTDSSYCIPTAG | gj 90180201 sp Q13480 C | [SDTDSSYCIPTAG Y 37 |
| 6126 | SENFDDYMKEVGV | gj 119781 sp P15090 FAI | [SENFDDYMKEVGV Y 2  |
| 6127 | <<Marker>>    | control_spot            | NA                  |
| 6128 | SIRMGRYRDHFAA | gj 19857975 sp P29322 E | NA                  |
| 6129 | SPGMKIYIDPFTY | gj 1706663 sp P54762 EI | [SPGMKIYIDPFTY Y 59 |
| 6130 | DCLDGLYALMSRC | gj 48429194 sp P30530 C | [DCLDGLYALMSRC Y 7  |
| 6131 | DDFDGTYETQGGK | gj 47117832 sp P21709 E | [DDFDGTYETQGGK Y 7  |
| 6132 | ETGTEEYMKMDLG | gj 547738 sp P35568 IR  | NA                  |
| 6133 | AIKMGRYTEIFME | gj 1706628 sp P54756 EI | NA                  |
| 6134 | FPGKTXYIDPETY | gj 146345416 sp Q15375  | NA                  |
| 6135 | FRQGKDYVGAIPV | gj 9087218 sp P35968 V  | [FRQGKDYVGAIPV Y 9  |

|      |               |                                               |
|------|---------------|-----------------------------------------------|
| 6136 | GEEEEYLKINP   | gj 12643789 sp Q92692 I NA                    |
| 6137 | GIDDQSYKHLFQP | gj 3334210 sp O15379 H NA                     |
| 6138 | EEVDEMYREAPVD | gj 188586 gb AAA59852. NA                     |
| 6139 | DAEMTGYVVTRWY | gj 6685642 sp O15264 M NA                     |
| 6140 | EDDEDCYGNYNL  | gj 17380162 sp O15530 I [EDDEDCYGNYNL Y 3     |
| 6141 | VKKLKDYAFIHFD | gj 92090361 sp O60506 I [VKKLKDYAFIHFD Y 37   |
| 6142 | KPDSSFYKGLDLN | gj 114787 sp P02730 B3, [KPDSSFYKGLDLN Y 3E   |
| 6143 | ENEEQEYVQTVKS | gj 113944 sp P04083 AN [ENEEQEYVQTVKS Y 2     |
| 6144 | YREGPTYQRRGSL | gj 12643411 sp P50549 E NA                    |
| 6145 | DSEMTGYVVTRWY | gj 2851522 sp P53778 M [DSEMTGYVVTRWY Y       |
| 6146 | NEGDNDYIPLPD  | gj 129890 sp P09619 PG [NEGDNDYIPLPD Y 10     |
| 6147 | GESDGGYMDMSKD | gj 129890 sp P09619 PG [GESDGGYMDMSKD Y       |
| 6148 | <<Marker>>    | control_spot NA                               |
| 6149 | SNYMAPYDNYVPS | gj 129890 sp P09619 PG [SNYMAPYDNYVPS Y 7     |
| 6150 | VSETDDYAEIIDE | gj 3183518 sp Q05397 F, [VSETDDYAEIIDE Y 397  |
| 6151 | LSFEELYRNAYTM | gj 12643396 sp Q13618 C [LSFEELYRNAYTM Y 5E   |
| 6152 | SKCCCIYEKPRAF | gj 74739598 sp O60927 I [SKCCCIYEKPRAF Y 64   |
| 6153 | NAEDCLYELPENI | gj 74753081 sp Q9NZ63  [NAEDCLYELPENI Y 14    |
| 6154 | SHGTHEYHAETIK | gj 20178296 sp P14618 T [SHGTHEYHAETIK Y 83   |
| 6155 | VSVPKGYVAKSPD | gj 94730427 sp Q9P2R7  NA                     |
| 6156 | VQRISTYGLPAGG | gj 30172980 sp Q9Y5K6  [VQRISTYGLPAGG Y 8E    |
| 6157 | VQKSKEYFSKQK  | gj 548453 sp Q06830 PR [VQKSKEYFSKQK Y 19     |
| 6158 | MKKELNYFAKALE | gj 52788229 sp P00558 F [MKKELNYFAKALE Y 1E   |
| 6159 | HTSNNIYEAVKYS | gj 145558902 sp Q9H9T: [HTSNNIYEAVKYS Y 20    |
| 6160 | SDARALYEAGERR | gj 113944 sp P04083 AN NA                     |
| 6161 | PYATSLYHS     | gj 74728034 sp Q8IV50 L [PYATSLYHS Y 213 Q8I  |
| 6162 | QDPNPQYSPIIKQ | gj 143811460 sp Q9NP3: [QDPNPQYSPIIKQ Y 21    |
| 6163 | GDQIDTYELSGGA | gj 461976 sp Q05193 DY [GDQIDTYELSGGA Y 3E    |
| 6164 | PKEDPIYDEPEGL | gj 17366642 sp Q99704 I [PKEDPIYDEPEGL Y 36   |
| 6165 | GAEYATYQTKSTT | gj 27502427 ref NP_758  NA                    |
| 6166 | HTGEKPYQCGQCG | gj 3123173 sp Q15697 Z  NA                    |
| 6167 | APGQGPYPYSLSE | gj 13431358 sp Q9NZB2: [APGQGPYPYSLSE Y 3     |
| 6168 | QPGEQKYEYKSDQ | gj 41019505 sp Q04637 I [QPGEQKYEYKSDQ Y E    |
| 6169 | <<Marker>>    | control_spot NA                               |
| 6170 | PAGTEDYIHIRIQ | gj 1174483 sp P41567 EI [PAGTEDYIHIRIQ Y 30 F |
| 6171 | EPPYTAYVGNLPF | gj 18276665 sp Q15056 I [EPPYTAYVGNLPF Y 4E   |
| 6172 | STSRSLYASSPGG | gj 55977767 sp P08670 \ [STSRSLYASSPGG Y 5    |
| 6173 | AGAVASYDYLVIG | gj 14916998 sp P00390 C [AGAVASYDYLVIG Y 65   |
| 6174 | DHSHLLYSTIPRM | gj 14916543 sp O60716 C NA                    |
| 6175 | GVEDPEYAVTQLA | gj 60415944 sp Q9UJZ1  [GVEDPEYAVTQLA Y 1     |
| 6176 | IVSNDAYNKMANS | gj 11133517 sp Q03125 I NA                    |
| 6177 | EDQESEYSEKPLG | gj 135077 sp P08153 SW NA                     |
| 6178 | TDKEYDYEHYQIL | gj 56757368 sp P07248 / NA                    |
| 6179 | SINEEDYAAKSKH | gj 1711597 sp P46676 SI NA                    |
| 6180 | HYKWSDYANDPEL | gj 50400296 sp Q04052 , NA                    |
| 6181 | ISSLPKYSSLDID | gj 416737 sp P24813 YA NA                     |
| 6182 | NIYEGSYSIMELD | gj 126217 sp P08638 LEI NA                    |
| 6183 | SVDEPQYQRRNID | gj 1351976 sp P05085 AI NA                    |
| 6184 | GVSDQQYDSMAKT | gj 1711459 sp P53438 S( NA                    |
| 6185 | NISASDYTVANNS | gj 1708268 sp P54785 M NA                     |
| 6186 | DNEDDEYDDADLH | gj 88984445 sp P32389 N NA                    |
| 6187 | GQSQGLYISSNSS | gj 2507068 sp P22148 M NA                     |

|                     |                                             |
|---------------------|---------------------------------------------|
| 6188 SVFTPEYDDSRIR  | gj 62297871 sp Q61083 I NA                  |
| 6189 TDSLSTYINANYI  | gj 134039192 sp Q15256 NA                   |
| 6190 <<Marker>>     | control_spot NA                             |
| 6191 SIQEGKYEFDPKD  | gj 90102033 sp Q9HBH9 NA                    |
| 6192 QIDENWYEGMLHG  | gj 10720276 sp Q99962  NA                   |
| 6193 LTFKVDYGSFAFV  | gj 6685621 sp Q9Y6R4  NA                    |
| 6194 DTSDNYGERSEA   | gj 67477383 sp P49796  NA                   |
| 6195 NGPREKYGIVDYM  | gj 119530 sp P13667 PD NA                   |
| 6196 TSMEPGYFDNLAN  | gj 73621176 sp Q6UXM1 NA                    |
| 6197 YMWEVYYPNLGWM  | gj 56757653 sp Q13029 I NA                  |
| 6198 CTYKDDYMISKDN  | gj 134035407 sp Q9NWE NA                    |
| 6199 EKSKGHYHTIPDN  | gj 19856971 sp P20929  NA                   |
| 6200 GPEKSMYVVTKEN  | gj 1170784 sp P42702 LI NA                  |
| 6201 QLPPEGYVVVVKN  | gj 3183003 sp Q14289 F NA                   |
| 6202 AFPSPDKYEQDDLN | gj 130484567 ref NP_00 NA                   |
| 6203 DSYKSGYVYSELN  | gj 120660202 gb AAI304 NA                   |
| 6204 LEERKTYVNTTLY  | gj 464868 sp Q02763 TIE [LEERKTYVNTTLY Y 11 |
| 6205 LHTDDGYMPMSPG  | gj 547738 sp P35568 IRS [LHTDDGYMPMSPG Y    |
| 6206 ARVTVKYDRRELQ  | gj 55583974 sp Q96A00  NA                   |
| 6207 SCSKQSYNKEKG   | gj 33112447 sp Q8IWU6 NA                    |
| 6208 WAGETNYISVFKG  | gj 55977853 sp Q16820 I NA                  |
| 6209 GESSHRYEVSGQN  | gj 150378520 ref NP_11 NA                   |
| 6210 IPEEADYVGIERN  | gj 48429232 sp P53708 I NA                  |
| 6211 NASREMYERENRN  | gj 73920251 sp Q8WXW NA                     |
| 6212 RYTKEVYVPHPRN  | gj 20139806 sp Q9P0M9 NA                    |
| 6213 FHCHEGYLHGAP   | gj 148886654 ref NP_69 NA                   |
| 6214 IREHLSYEDWNYN  | gj 119600085 gb EAW79 NA                    |
| 6215 LFKTDIYMYVCAP  | gj 85700269 sp P51811  NA                   |
| 6216 SAFELSYDQKKAP  | gj 31747511 gb AAP576 NA                    |
| 6217 VFYEKDYEGTVYN  | gj 52782976 sp Q9BQS7 NA                    |
| 6218 DEEAPDYGSGVRQ  | gj 119364606 sp Q12756 NA                   |
| 6219 KTFSGGYVHVLKG  | gj 20379566 gb AAH276 NA                    |
| 6220 NEYKQDYNEWYKG  | gj 19856971 sp P20929  NA                   |
| 6221 RPFSDPYCEGPKG  | gj 51701298 sp O94812 I NA                  |
| 6222 ALKMFLYADNEDR  | gj 30580379 sp Q9NP79  NA                   |
| 6223 HHSSPGYDSSPCR  | gj 83305815 sp P31629  NA                   |
| 6224 ITFNPLYWNVVAR  | gj 148887406 sp Q9UBM NA                    |
| 6225 LSSKPEYVKPDFR  | gj 119621930 gb EAX01 NA                    |
| 6226 PPSMLRYEEMTER  | gj 84028217 sp Q9P2K6  NA                   |
| 6227 AQEVDDYHAFQTL  | gj 68053323 sp Q9NYU2 NA                    |
| 6228 AVSMETYHVTLTL  | gj 46577674 sp O14523  NA                   |
| 6229 FVSERKYDEDLGR  | gj 148746220 ref NP_07 NA                   |
| 6230 IETELIYKYSPFR  | gj 114152840 sp Q9Y6X NA                    |
| 6231 ATEGPAYSQSAIC  | gj 116242721 sp P78424 NA                   |
| 6232 FTNESSYHRRGGC  | gj 141795194 gb AAI250 NA                   |
| 6233 IEYTSYEFSSNGC  | gj 74744660 sp Q5T2S8  NA                   |
| 6234 KGANPNYQDISGC  | gj 134034136 sp Q8IYU2 NA                   |
| 6235 NFPEPPYPDQIIC  | gj 74731809 sp Q96GC9 NA                    |
| 6236 HQSERYIRYHAA   | gj 74756617 sp Q5THJ4  NA                   |
| 6237 NVSETRYVSELTL  | gj 129890 sp P09619 PG NA                   |
| 6238 DKCEPKYFVFNRSR | gj 74731046 sp Q969I6  NA                   |
| 6239 GERDLIYAFHGSR  | gj 116248565 sp Q8N5Y NA                    |

|      |                |                                             |
|------|----------------|---------------------------------------------|
| 6240 | FDDEAYYAALGTR  | gi 83305809 sp Q96KB5  NA                   |
| 6241 | PVCSEAYIDARTL  | gi 51316944 sp O95625  NA                   |
| 6242 | VECDLTYHNVYSR  | gi 6648106 sp Q05086 U NA                   |
| 6243 | ELHVDRYDNHPDP  | gi 118575127 sp Q6ZTA NA                    |
| 6244 | IKRNLSYGDNSDP  | gi 116241334 sp Q9Y2H NA                    |
| 6245 | KRSSETYRVTPDP  | gi 12230074 sp Q14314  NA                   |
| 6246 | WAHMEKYLSFPTL  | gi 152013421 sp Q5VYM NA                    |
| 6247 | CTHHTGYCDIAEP  | gi 119605306 gb EAW84 NA                    |
| 6248 | WWNRDKYLGPAVL  | gi 114589581 ref XP_001 NA                  |
| 6249 | GFKQRPYSVAVPA  | gi 73917636 sp Q9UQB8 NA                    |
| 6250 | REDAVLYLLEIPK  | gi 13634076 sp Q9UDY2 [REDAVLYLLEIPK Y 554  |
| 6251 | YEPVSPYSCKEAP  | gi 135104 sp P07814 SY NA                   |
| 6252 | YDNLAIYKSFLGT  | gi 118572719 sp Q9H792 [YDNLAIYKSFLGT Y 638 |
| 6253 | RTTDGVYEGVAIG  | gi 116241237 sp P53396 [RTTDGVYEGVAIG Y 68  |
| 6254 | IKRNRYYDEDEDE  | gi 20138067 sp Q9UHB6 [IKRNRYYDEDEDE Y 74   |
| 6255 | PQITSPYENVPSQ  | gi 1703310 sp Q01484 A NA                   |
| 6256 | YSYTVKYTAVQQG  | gi 32129530 sp Q14315  NA                   |
| 6257 | AEVKAQYEEIANR  | gi 143811411 sp P13647 NA                   |
| 6258 | KKGNFNHYVEFTRI | gi 20141521 sp P24844  [KKGNFNHYVEFTRI Y 15 |
| 6259 | FTWCKSYEEISDD  | gi 1709093 sp P54296 M NA                   |
| 6260 | RGTIADYQPDDKA  | gi 20139105 sp Q99959  NA                   |
| 6261 | AELEELYGDIDAL  | gi 129899 sp P23219 PG NA                   |
| 6262 | SRLAGGYENVPTV  | gi 6093731 sp O60568 P NA                   |
| 6263 | YEGNFHYINLIKT  | gi 132326 sp P00797 RE NA                   |
| 6264 | TLQHRRYPNVFGI  | gi 27151704 sp Q9Y6N5  NA                   |
| 6265 | PGPACAYVNLNIC  | gi 730870 sp P41252 SY NA                   |
| 6266 | VIPVHYLIPPT    | gi 34223721 sp P29144  NA                   |
| 6267 | NPQEGLYNELQKD  | gi 23830999 sp P20963  [NPQEGLYNELQKD Y 1   |
| 6268 | SEEPSKYINASFI  | gi 33112650 sp P08575  NA                   |
| 6269 | AISIDRYTAVVMP  | gi 1169206 sp P35462 D NA                   |
| 6270 | CMRVELYGCVWLD  | gi 2497564 sp Q16832 D NA                   |
| 6271 | LSPSSGYMPMNQG  | gi 119534 sp P21860 ER NA                   |
| 6272 | KANNLLYINPEAF  | gi 5443350 sp P23945 FS NA                  |
| 6273 | ILADEIYGDMVFS  | gi 114713 sp P17735 AT NA                   |
| 6274 | RGKKFSYVDADGS  | gi 34223720 sp P25940  NA                   |
| 6275 | ASRVSIYDNVPGS  | gi 90185285 sp Q9Y3M8 NA                    |
| 6276 | DKSYGGYEVVGGG  | gi 67476890 sp Q15517  NA                   |
| 6277 | GPNNGGYDDDQGS  | gi 148887370 sp Q92630 NA                   |
| 6278 | IGEEILYCELKGS  | gi 41019474 sp P15529  NA                   |
| 6279 | DVLKDDYDYVLIS  | gi 74751081 sp Q8N766  NA                   |
| 6280 | IHRSNPYIQLGIS  | gi 29840784 sp Q8N448  NA                   |
| 6281 | QERTVAYINVDIS  | gi 20139287 sp Q9UQQ1 NA                    |
| 6282 | THSKEHYHFYEIS  | gi 119591033 gb EAW70 NA                    |
| 6283 | GWEKGAYKKWGKS  | gi 118572659 sp Q92628 NA                   |
| 6284 | RERDGHYSNSHKS  | gi 74760546 sp Q8WUA2 NA                    |
| 6285 | LEPDSTYFDLPQS  | gi 8928244 sp O15350 P NA                   |
| 6286 | SCVKDIYKHLARS  | gi 119611154 gb EAW90 NA                    |
| 6287 | YAKCNPYMDS PQS | gi 2507187 sp P22061 P NA                   |
| 6288 | HGADPDYNCTDQG  | gi 62512181 sp Q8WXK2 NA                    |
| 6289 | VDSEFQYTYEYQG  | gi 119587444 gb EAW67 NA                    |
| 6290 | DNEKCKYLTKPEP  | gi 29336810 sp Q8TE59  NA                   |
| 6291 | INFMLTYVAVDYS  | gi 119599806 gb EAW79 NA                    |

|      |                |                                              |
|------|----------------|----------------------------------------------|
| 6292 | DIDMTDYDDVRRC  | gj 1346792 sp P49642 PI NA                   |
| 6293 | CDSCEKYITGRVL  | gj 56404514 sp Q6H8Q1 NA                     |
| 6294 | MAKMEKYLHSSRC  | gj 6136393 sp Q14191 W NA                    |
| 6295 | DFENSAYVVFVVL  | gj 1346190 sp P48506 G NA                    |
| 6296 | LGCMDDYTTDSRG  | gj 74733154 sp Q9BTW9 NA                     |
| 6297 | AHLNVYYIILLAW  | gj 1352531 sp P48066 S NA                    |
| 6298 | GIICTFYTAVGGM  | gj 12643359 sp Q92911  NA                    |
| 6299 | DCAHFHYENVDFG  | gj 68846537 sp O14559  NA                    |
| 6300 | SVTSSAYPNPSIL  | gj 62906845 sp P27352 I NA                   |
| 6301 | ASKKTIITYIMAS  | gj 74762772 sp Q9UIB8  NA                    |
| 6302 | EEQVHTYVNTTGV  | gj 71152057 sp Q8WU2C [EEQVHTYVNTTGV Y 1:    |
| 6303 | LEKIQDYEKMPES  | gj 124308 sp P14778 IL1 [LEKIQDYEKMPES Y 49  |
| 6304 | MPSEEGYQDYEPE  | gj 586067 sp P37840 SY [MPSEEGYQDYEPE Y 1    |
| 6305 | RGSRDYAWHKQK   | gj 119595261 gb EAW74 [RGSRDYAWHKQK Y        |
| 6306 | SYEGNSYTFIDPT  | gj 547770 sp P07333 CS [SYEGNSYTFIDPT Y 56   |
| 6307 | WIRYHRYHGRSAA  | gj 83305339 sp P11309 F [WIRYHRYHGRSAA Y 3   |
| 6308 | AEPYNLYSSLKEL  | gj 118572681 sp P27986 [AEPYNLYSSLKEL Y 68:  |
| 6309 | LQDEANYHLYGSR  | gj 60393639 sp Q13546 I [LQDEANYHLYGSR Y 3:  |
| 6310 | RNKPTVYGVSPNY  | gj 85681908 sp P00519 / [RNKPTVYGVSPNY Y 2:  |
| 6311 | VSSTHYLLPERP   | gj 27923810 sp Q9UJM3 [VSSTHYLLPERP Y 85     |
| 6312 | CFSPNRYWLCAAT  | gj 54037168 sp P63244 C [CFSPNRYWLCAAT Y 2   |
| 6313 | ALDNPEYHNASNG  | gj 3913590 sp Q15303 E [ALDNPEYHNASNG Y 1    |
| 6314 | EETNNDYETADGG  | gj 399478 sp P31995 FC [EETNNDYETADGG Y 2    |
| 6315 | PPGSLEYLCLPAG  | gj 1345923 sp P32927 IL [PPGSLEYLCLPAG Y 62  |
| 6316 | QSPANIYYKV     | gj 1706673 sp P52799 EI [QSPANIYYKV Y 331 O7 |
| 6317 | RSTHTAYIK      | gj 20141191 sp O43184  NA                    |
| 6318 | TPSAEGYQDVRDR  | gj 56404432 sp O14639 / [TPSAEGYQDVRDR Y 4   |
| 6319 | AEEEEAVYEEPPEQ | gj 51316115 sp Q9UJU6  [AEEEEAVYEEPPEQ Y 3:  |
| 6320 | ERYSKEYIEKFKR  | gj 118572681 sp P27986 NA                    |
| 6321 | SFEEDDYESPND   | gj 10720065 sp Q13094 I [SFEEDDYESPND Y 1:   |
| 6322 | STSSGGYRRTPSV  | gj 50400546 sp Q8IZP0 / [STSSGGYRRTPSV Y 3:  |
| 6323 | TKMHGDYTLTLRK  | gj 118572681 sp P27986 [TKMHGDYTLTLRK Y 3:   |
| 6324 | TVSFNPYEPPELAP | gj 1174527 sp P43405 K/ [TVSFNPYEPPELAP Y 32 |
| 6325 | VTAPSPYAQPSST  | gj 57013009 sp Q9H3D4 NA                     |
| 6326 | DDDKNIYLTLPN   | gj 399478 sp P31995 FC [DDDKNIYLTLPN Y 30:   |
| 6327 | RQDDPSYRSFHSG  | gj 461854 sp P35222 CT NA                    |
| 6328 | TMKGLDYIDVLSG  | gj 145558935 sp Q4G0P NA                     |
| 6329 | QPFDLLYASGAAA  | gj 74714365 sp Q8IVL5 F NA                   |
| 6330 | LVDEKLYDQISLP  | gj 17368720 sp Q9C0E2  NA                    |
| 6331 | CESQSGYVWNALV  | gj 152113096 sp Q96DM NA                     |
| 6332 | LGPVGYEAIGLV   | gj 13431764 sp O95831  NA                    |
| 6333 | CLDEGGYISPRI   | gj 1705485 sp P51451 BI NA                   |
| 6334 | KAQSNPYNGPHL   | gj 45477156 sp Q8WWI1 NA                     |
| 6335 | MLFVALYLQARMK  | gj 45477007 sp O14494 I NA                   |
| 6336 | SEALSQYKMNITS  | gj 119597197 gb EAW76 NA                     |
| 6337 | QSGMTAYGTRRHL  | gj 6226844 sp Q99439 C NA                    |
| 6338 | KGSVADYGNLMEN  | gj 32469678 sp Q14185 I NA                   |
| 6339 | VPIYEGYALPHAI  | gj 117167827 gb AAI130: NA                   |
| 6340 | SPPPAPYSAPQAP  | gj 74712301 sp Q6ZVM7 NA                     |
| 6341 | RDVFNVYVNSSIP  | gj 29839473 sp P59535  NA                    |
| 6342 | RPQERSYMLQRWQ  | gj 17380440 sp P46100 / NA                   |
| 6343 | GYETARYGTGVFG  | gj 68565268 sp Q9BWL3 [GYETARYGTGVFG Y 1     |

|                     |                                             |
|---------------------|---------------------------------------------|
| 6344 SPATDLYQVPPGP  | gi 8134339 sp P56945 B  [SPATDLYQVPPGP Y 1  |
| 6345 QGYSVEYQLLNGG  | gi 13638154 sp P16144 I [QGYSVEYQLLNGG Y 1  |
| 6346 KQAKIHYIKNHEF  | gi 547803 sp Q05655 KP [KQAKIHYIKNHEF Y 15  |
| 6347 GDINTIYQPPEPR  | gi 2499640 sp Q99759 M NA                   |
| 6348 KKGNFNYIEFTRI  | gi 127169 sp P19105 ML NA                   |
| 6349 GNADLAYILSMEP  | gi 28558771 sp P55211 C [GNADLAYILSMEP Y 15 |
| 6350 KEDDKIYRGINNY  | gi 3123165 sp O15541 R NA                   |
| 6351 LGASDPYVRVTLY  | gi 32172435 sp P46934 T NA                  |
| 6352 EDSANVYEQDDL   | gi 1169233 sp P43146 D  NA                  |
| 6353 AIADNCYFNMKRN  | gi 9297020 sp Q13402 M NA                   |
| 6354 LLAHGHYASPEIK  | gi 94730425 sp Q13813 C NA                  |
| 6355 KVELIAYFEKVG   | gi 1708973 sp P51608 M NA                   |
| 6356 AGSLPNYATINGK  | gi 55976600 sp Q9HBL0  NA                   |
| 6357 LIIEDPYYGNDSD  | gi 1709543 sp P24666 PI [LIIEDPYYGNDSD Y 13 |
| 6358 ADQDINYYIPAED  | gi 85396869 gb AAI0478  NA                  |
| 6359 KPGEVIYKCPKCC  | gi 116242853 sp Q9NXF  NA                   |
| 6360 VLADVSYLMAMEK  | gi 116241253 sp P35626 NA                   |
| 6361 SAHKLLYALEIIE  | gi 74723109 sp Q70CQ2 NA                    |
| 6362 KREDQKYALSVM   | gi 38503102 sp Q8WXU  NA                    |
| 6363 NADEFEYVVAEKQ  | gi 119592142 gb EAW71 NA                    |
| 6364 VRQKMLYAATRAT  | gi 41688753 sp Q12792  NA                   |
| 6365 NPNNTFYATKRLI  | gi 21264428 sp P38646 C NA                  |
| 6366 LSGKTEYMAFPKP  | gi 124015205 sp Q15154 NA                   |
| 6367 LLTSAIYALQGRS  | gi 74758339 sp Q6PGP7 NA                    |
| 6368 PGAQQLYSRGP    | gi 13124510 sp O95487 C [PGAQQLYSRGP Y 1    |
| 6369 VCPKEVYDVMLGC  | gi 134035335 sp Q16288 [VCPKEVYDVMLGC Y 8   |
| 6370 IFLSGCYTAVAVA  | gi 92058705 sp Q9UP38  NA                   |
| 6371 FSSGGAYPNIPLS  | gi 29840846 sp Q10713 I NA                  |
| 6372 DKVFNDYTAVPDL  | gi 1706563 sp P42892 E  NA                  |
| 6373 NSCSLHYINPYQP  | gi 10719954 sp Q9UBL6  NA                   |
| 6374 EILLQSYENVSNE  | gi 145559478 sp Q14789 NA                   |
| 6375 HQEDNDYINASLI  | gi 131467 sp P18031 PTI [HQEDNDYINASLI Y 66 |
| 6376 SQEDGDYINANYI  | gi 20141721 sp P35236 F NA                  |
| 6377 NPLFPIYENVNPE  | gi 126469 sp P23467 PTI NA                  |
| 6378 TEYSIKYTAVDGE  | gi 1709906 sp P23468 P NA                   |
| 6379 SPSRSDYINASPI  | gi 2499754 sp Q16849 P NA                   |
| 6380 DSHIHAYVNALLI  | gi 400199 sp P23471 PTI NA                  |
| 6381 RSNDKVVYENV    | gi 3183518 sp Q05397 F, [RSNDKVVYENV Y 9    |
| 6382 SVHDMDYVNPRGV  | gi 13124260 sp Q92538 C NA                  |
| 6383 DEPEGDYEEVLEP  | gi 123557 sp P14317 HC [DEPEGDYEEVLEP Y 3   |
| 6384 RVDPNGYMMMS    | gi 547738 sp P35568 IR  [RVDPNGYMMMS Y 1    |
| 6385 KNNKELYGFLFND  | gi 3859855 gb AAC7861  NA                   |
| 6386 TGKSADYVNLALK  | gi 124106290 sp Q9Y4C  NA                   |
| 6387 PQAPAGYANVATH  | gi 41688816 sp Q96T58 I NA                  |
| 6388 ILFDYEYLNPN    | gi 68846905 sp Q13469 I NA                  |
| 6389 ARTCQLYPNAIAS  | gi 59803092 sp P51003 F NA                  |
| 6390 ENLSKRYEEIYLK  | gi 132164 sp P06400 RB NA                   |
| 6391 TRCWKDYVNLRL   | gi 116242827 sp Q9NS8  NA                   |
| 6392 RKQLVVYEEISDP  | gi 6094362 sp O60224 S NA                   |
| 6393 SDYITHYTRSAPK  | gi 126157508 ref NP_99  NA                  |
| 6394 LNGQAVYAACQTI  | gi 2506326 sp P47989 XI NA                  |
| 6395 GFDPDSDYAEPMDA | gi 29611783 sp Q9NRY4 NA                    |

|                    |                            |
|--------------------|----------------------------|
| 6396 FLQSDTYKANSAK | gi 41688802 sp Q9BYV7 NA   |
| 6397 DGGQSVYHVHLHV | gi 1708543 sp P49773 HI NA |
| 6398 ETVAAYYEEQHPE | gi 119364597 sp P24001 NA  |
| 6399 YIEEAEYYKMLQ  | gi 119584213 gb EAW63 NA   |
| 6400 NSTKKQYKKWVEL | gi 134047802 sp Q9BYX NA   |





|                                         |           |
|-----------------------------------------|-----------|
| NA                                      | PREDICTED |
| NA                                      | NA        |
| NA                                      | PREDICTED |
| NA                                      | NA        |
| [KIAA0174 phospho Y43                   | NA        |
| [PHF19 phospho Y45 Q                    | NA        |
| [TIAL1 phospho Y50 Q                    | NA        |
| [ <sup>3</sup> H actin, beta" phospho Y | NA        |
| [PDE8A phospho Y194 C                   | NA        |
| NA                                      | PREDICTED |
| [MYD88 phospho Y276 C                   | PREDICTED |
| NA                                      | PREDICTED |

NA PREDICTED  
 NA PREDICTED  
 NA NA  
 NA PREDICTED  
 NA PREDICTED  
 NA PREDICTED  
 [RACK1|phospho|Y52|P PREDICTED  
 NA PREDICTED  
 [CTLA-4|phospho|Y201| PREDICTED  
 [PXN|phospho|Y40|P49 PREDICTED  
 [DYRK1B|phospho|Y271 PREDICTED  
 NA PREDICTED  
 NA PREDICTED  
 [IRS-1|phospho|Y632|P PREDICTED  
 [TrkA iso2|phospho|Y67 PREDICTED  
 [EphB3|phospho|Y792|P PREDICTED  
 NA NA  
 [TrkC|phospho|Y709|Q1 PREDICTED  
 [PIK3R3|phospho|Y341| PREDICTED  
 [Gab1|phospho|Y447|Q1 PREDICTED  
 [Axl|phospho|Y814|P305 PREDICTED  
 [ER-beta|phospho|Y488| PREDICTED  
 [Cdc2|phospho|Y15|P06 PREDICTED  
 [EGFR|phospho|Y1110|F PREDICTED  
 [EpoR|phospho|Y426|P1 PREDICTED  
 [FGFR2|phospho|Y769|F PREDICTED  
 [IFNAR1|phospho|Y466| PREDICTED  
 [PLCG1|phospho|Y771|F PREDICTED  
 [CD3Z|phospho|Y123|P PREDICTED  
 [IkB-alpha|phospho|Y42| PREDICTED  
 [CTNNB1|phospho|Y654 PREDICTED  
 [STAT5A|phospho|Y694 PREDICTED  
 [ZAP70|phospho|Y318|P PREDICTED  
 NA PREDICTED  
 [Akt1|phospho|Y326|P31 PREDICTED  
 NA PREDICTED  
 NA PREDICTED  
 NA NA  
 NA PREDICTED  
 NA PREDICTED  
 [CLIM1|phospho|Y150|O NA  
 [PSMB7|phospho|Y154|C NA  
 [YB-1|phospho|Y162|P6 NA  
 [IQGAP1|phospho|Y172| NA  
 [p38-alpha|phospho|Y18 PREDICTED

[CD3E|phospho|Y170|P2 NA  
[hnRNP 2H9|phospho|Y: PREDICTED  
[TSA|phospho|Y305|Q NA  
[ZNF330|phospho|Y308| NA  
NA NA  
[eIF3-zeta|phospho|Y311 NA  
[ZNF24|phospho|Y335|P NA  
[GCN5-like 2|phospho|Y NA  
[MAP1A|phospho|Y773|f NA  
[LDLR|phospho|Y845|PC NA  
[PCDH7|phospho|Y948| NA  
[ALK|phospho|Y1092|Q NA  
[ALK|phospho|Y1278|Q NA  
NA NA  
[FKBP8|phospho|Y265|C NA  
[IRSp53|phospho|Y338| NA  
[Sgk223|phospho|Y390| NA  
[Kaiso|phospho|Y443|Q NA  
[FLJ21610|phospho|Y45 NA  
[Sgk269|phospho|Y476| NA  
NA PREDICTED  
[ERK2|phospho|Y42|P2 NA PREDICTED  
NA PREDICTED  
NA PREDICTED  
[RSK2|phospho|Y422|P NA PREDICTED  
NA PREDICTED  
NA PREDICTED  
NA PREDICTED  
NA NA  
NA PREDICTED  
[INPP4|phospho|Y355|Q PREDICTED  
NA PREDICTED  
NA PREDICTED

|                        |           |
|------------------------|-----------|
| NA                     | PREDICTED |
| [FBNP1 phospho Y296 C  | PREDICTED |
| NA                     | PREDICTED |
| [TFIIS phospho Y126 P2 | PREDICTED |
| NA                     | PREDICTED |
| [IMP-1 phospho Y39 Q9I | PREDICTED |
| NA                     | NA        |
| NA                     | PREDICTED |
| [GSTP1 phospho Y198 F  | NA        |
| NA                     | PREDICTED |
| NA                     | NA        |
| NA                     | NA        |
| NA                     | NA        |

|                        |           |
|------------------------|-----------|
| NA                     | NA        |
| [GRK2 phospho Y356 P2  | NA        |
| [ADRB2 phospho Y141 F  | NA        |
| [PDGFRb phospho Y763   | PREDICTED |
| NA                     | NA        |
| NA                     | PREDICTED |
| [p63 phospho Y36 Q9H3  | PREDICTED |
| NA                     | PREDICTED |
| [ATP1A1 phospho Y10 F  | PREDICTED |
| NA                     | PREDICTED |
| NA                     | PREDICTED |
| NA                     | PREDICTED |
| [KIAA0853 phospho Y59  | PREDICTED |
| NA                     | PREDICTED |
| [STAT5B phospho Y679   | NA        |
| [ZAP70 phospho Y292 P  | NA        |
| [FGFR1 phospho Y584 /  | NA        |
| [VCP phospho Y804 Q0   | NA        |
| [LAT iso2 phospho Y226 | NA        |
| [Abl phospho Y488 P005 | NA        |
| [CD22 phospho Y807 P2  | NA        |
| [SLAP-130 phospho Y59  | NA        |
| [Jak1 phospho Y1022 P2 | NA        |
| [Jak2 phospho Y221 Q6  | NA        |
| [PTP1B phospho Y152 C  | NA        |
| [IFNGR1 phospho Y457   | NA        |
| [CEACAM1 phospho Y4    | NA        |
| [CD3Z phospho Y83 P2C  | NA        |
| [SHP-2 phospho Y327 P  | NA        |

[MINK|phospho|Y193|Q& NA  
[DAB1|phospho|Y220|P& NA  
[Siglec-10|phospho|Y69' NA  
[PTP1B|phospho|Y152|C NA  
[CSF2RB|phospho|Y593 NA  
[Brk|phospho|Y351|Q13& NA  
[SHP-1|phospho|Y564|P NA  
[HER4|phospho|Y1056|C NA  
[DAB1|phospho|Y232|P& NA  
[Fe65|phospho|Y545|Q9 NA  
[Bcr|phospho|Y360|P11& NA  
[Rab24|phospho|Y17|Q9 NA  
[Abl|phospho|Y283|P00& NA  
[PTPRA iso2|phospho|Y NA  
[cortactin|phospho|Y486 NA  
NA NA  
NA NA  
NA NA  
NA NA  
NA NA  
NA NA  
[SPTBN2|phospho|Y172 NA  
[desmoplakin|phospho|Y NA  
[Cas-L|phospho|Y172|Q' NA  
[CD3G|phospho|Y171|P( NA  
[RICS|phospho|Y1706|O NA  
[PDAP1|phospho|Y17|Q NA  
[Ikb-epsilon|phospho|Y1 NA  
[RREB-1|phospho|Y159& NA  
[PAK5|phospho|Y159|Q& NA  
[ENTH|phospho|Y159|Q NA  
[LRP6|phospho|Y1584|C NA  
[CSAD|phospho|Y158|Q NA  
[NTS|phospho|Y146|P3C NA  
[eIF2A|phospho|Y146|P( NA  
[CCDC50|phospho|Y144 NA  
[YB-1|phospho|Y145|P6' NA  
[CCDC50|phospho|Y144 NA  
[Dicer1|phospho|Y1435|& NA  
NA NA  
[BST1|phospho|Y134|Q1 NA  
[hnRNP G|phospho|Y13' NA  
[NMDAR2A|phospho|Y1: NA  
[ACP1|phospho|Y131|P2 NA  
[CCR8|phospho|Y132|P& NA  
[Cx40|phospho|Y122|P3 NA  
[mucin 1|phospho|Y121& NA  
[GKN1|phospho|Y121|Q' NA  
[mucin 1|phospho|Y120& NA  
[RPL19|phospho|Y120|P NA  
[TSSK1|phospho|Y12|Q& NA  
[SOX7|phospho|Y112|Q& NA

[TIE1|phospho|Y1113|Q| NA  
[MYO6|phospho|Y1114|K| NA  
[OSTF1|phospho|Y111|C| NA  
[TNFAIP3|phospho|Y111| NA  
NA NA  
NA NA  
NA NA  
[snRNP 70|phospho|Y12| NA  
NA NA  
[CYP17A1|phospho|Y32| NA  
NA NA  
NA NA  
NA NA  
[RanBP1|phospho|Y103| NA  
[NRXN1|phospho|Y1027| NA  
[SHIP|phospho|Y1021|Q| NA  
[NEBL|phospho|Y102|O| NA  
[TIF1-gamma|phospho|Y| NA  
[GALNT3|phospho|Y101| NA  
NA NA  
NA NA  
NA PREDICTED  
[MST1|phospho|Y433|Q| PREDICTED  
NA PREDICTED  
NA PREDICTED



NA PREDICTED  
NA PREDICTED  
NA PREDICTED  
NA PREDICTED  
NA PREDICTED  
NA PREDICTED  
NA PREDICTED  
[KIAA1217]phospho|Y38 PREDICTED  
NA PREDICTED  
[ARPC5]phospho|Y18|O PREDICTED  
NA PREDICTED  
NA PREDICTED



NA PREDICTED  
NA PREDICTED  
NA PREDICTED  
[HER2|phospho|Y1196|F PREDICTED  
[STAT3|phospho|Y705|F PREDICTED  
NA PREDICTED  
[TrkB|phospho|Y705|Q6: PREDICTED  
NA NA  
NA PREDICTED  
[EphA5|phospho|Y656|P PREDICTED  
[EphA4|phospho|Y602|C PREDICTED  
[TXK|phospho|Y420|P42 PREDICTED  
[CHED|phospho|Y716|Q PREDICTED  
NA PREDICTED  
[VEGFR-2|phospho|Y10: PREDICTED  
[Axl|phospho|Y695|P305 PREDICTED  
[TrkA iso2|phospho|Y67: PREDICTED  
[SLAM|phospho|Y281|Q PREDICTED  
[Met|phospho|Y1232|P1( PREDICTED  
[Kit|phospho|Y567|P055: PREDICTED  
[Kit|phospho|Y823|P107: PREDICTED  
NA PREDICTED  
[HS1|phospho|Y222|P14 PREDICTED  
[ezrin|phospho|Y145|P1( PREDICTED  
[14-3-3 beta|phospho|Y2 PREDICTED  
NA PREDICTED  
[APP iso8|phospho|Y74( PREDICTED  
NA PREDICTED  
NA NA  
NA PREDICTED  
[FGFR1|phospho|Y307|F PREDICTED  
[PXN|phospho|Y118|Q8( PREDICTED  
[L-plastin|phospho|Y124 NA  
[TRXR1|phospho|Y131|( NA  
[RPL8|phospho|Y132|P6 NA  
[PABP 4|phospho|Y140|( NA  
[DYRK1A|phospho|Y145 NA  
NA NA  
[CTNND1|phospho|Y257 NA  
[C21orf59|phospho|Y26( NA  
[TKT|phospho|Y275|P29 NA  
[CTNND1|phospho|Y28( NA  
[ENO1|phospho|Y286|P( NA  
[VGCNL1|phospho|Y497 NA  
[Lyn|phospho|Y507|P07( NA  
[TACC1|phospho|Y533|( NA  
[FAK|phospho|Y576|Q0( PREDICTED  
[RoXaN|phospho|Y664|( NA  
[PFKL|phospho|Y632|P1 NA  
NA NA  
[TRXR1|phospho|Y131|( NA  
NA NA





NA PREDICTED  
NA PREDICTED

[Gab1|phospho|Y259|Q1 NA  
[cortactin|phospho|Y470 NA  
[MyoD|phospho|Y212|P1 NA  
[RIPK1|phospho|Y387|Q NA  
[InsR|phospho|Y992|P0€ NA  
[CD5|phospho|Y487|P0€ NA  
[Abl iso1|phospho|Y257| NA  
[CD3Z|phospho|Y142|P2 NA  
NA NA  
[abLIM|phospho|Y373|O NA  
[ICAM-1|phospho|Y501|f NA  
NA NA  
[GAGE3|phospho|Y10|Q NA  
[GCSFR|phospho|Y787| NA  
[Kv1.2|phospho|Y132|P1 NA  
[PKCD|phospho|Y334|Q NA  
[IP3R1|phospho|Y353|Q NA  
[PLCG2|phospho|Y1245 NA  
[CD3E|phospho|Y181|P2 NA  
[cortactin|phospho|Y421 NA  
[Fes|phospho|Y811|P07: NA  
[FGFR1|phospho|Y583|f NA  
[abLIM|phospho|Y357|O NA  
[BKR2|phospho|Y332|P3 NA  
[PKD1|phospho|Y502|Q NA  
[CSK|phospho|Y184|P41 NA  
[FLT3|phospho|Y599|P3 NA  
[FGFR1|phospho|Y280|f NA  
[CSF2RB|phospho|Y766 NA  
[CSF2RB|phospho|Y822 NA  
NA NA







|                          |           |
|--------------------------|-----------|
| NA                       | PREDICTED |
| ['PPP2R5D phospho Y58    | PREDICTED |
| NA                       | NA        |
| NA                       | PREDICTED |
| ['IQGAP3 phospho Y126    | PREDICTED |
| NA                       | PREDICTED |
| NA                       | NA        |
| NA                       | PREDICTED |
| ['PLCL2 phospho Y581 C   | PREDICTED |
| NA                       | PREDICTED |
| ['FLJ12707 phospho Y11   | NA        |
| ['snRNP C phospho Y12    | NA        |
| ['caveolin-1 phospho Y14 | PREDICTED |
| ['CDK3 phospho Y19 Q0    | NA        |
| NA                       | PREDICTED |
| NA                       | PREDICTED |
| NA                       | PREDICTED |
| ['FAM98B phospho Y147    | PREDICTED |
| NA                       | PREDICTED |

[LPP|phospho|Y332|Q93 PREDICTED  
NA NA  
NA PREDICTED  
NA PREDICTED  
NA PREDICTED  
[VEGFR-2|phospho|Y12 PREDICTED  
NA PREDICTED  
[C7orf28A|phospho|Y43 PREDICTED  
NA PREDICTED  
NA PREDICTED  
NA PREDICTED  
NA PREDICTED  
NA PREDICTED  
NA NA  
NA PREDICTED  
[EphB2|phospho|Y604|P PREDICTED  
[EphA3|phospho|Y779|P PREDICTED  
NA NA  
[EphA2|phospho|Y772|P PREDICTED  
[FGFR4|phospho|Y642|F PREDICTED  
[TrkC|phospho|Y516|Q0 PREDICTED  
[Tyk2|phospho|Y1047|Q1 PREDICTED  
NA PREDICTED  
[TrkA iso2|phospho|Y670 PREDICTED  
NA PREDICTED  
NA PREDICTED







NA PREDICTED  
[HER2|phospho|Y1127|F PREDICTED  
NA PREDICTED  
[DLG5|phospho|Y1133|C PREDICTED  
NA PREDICTED  
[EGFR|phospho|Y1197|F PREDICTED  
[HER2|phospho|Y735|P( NA  
[ADRB2|phospho|Y141|F NA  
[RapGEF1|phospho|Y50 NA  
[P130Cas|phospho|Y234 NA  
[Hrs|phospho|Y334|O14( NA  
NA NA  
[Bcr|phospho|Y328|P112 NA  
[Mer|phospho|Y749|Q12 NA  
[Rab24|phospho|Y172|Q NA  
[FGFR1|phospho|Y608|/ NA  
[ephrin-B2|phospho|Y31( NA  
[FRS2|phospho|Y435|Q( NA  
[EGFR|phospho|Y869|P( NA  
[USP6NL|phospho|Y739 NA  
[PLCG2|phospho|Y1217 NA  
[Ack|phospho|Y284|Q07 NA  
[G-alpha(q)|phospho|Y3( NA  
[LPP|phospho|Y300|Q9( NA  
[CHD-1|phospho|Y1068| NA  
[Golgin-84|phospho|Y54 NA  
[gp130|phospho|Y915|P( NA  
[DDEF1|phospho|Y782|C NA  
[KiSS-1|phospho|Y112|C NA  
[PIPK I-gamma|phospho NA  
[Gab2|phospho|Y266|Q( NA  
NA NA  
[RCAS1|phospho|Y48|O NA  
[Cbl-b|phospho|Y363|Q1 NA  
[Gab2|phospho|Y632|Q( NA  
[CTNND1|phospho|Y19( NA  
[Lyn|phospho|Y192|P07( NA  
[ATIC|phospho|Y192|P3 NA  
[TAGLN2|phospho|Y191 NA  
[HSP90B|phospho|Y191 NA  
[eplin|phospho|Y190|Q9( NA  
[PAG|phospho|Y181|Q9( NA  
[GALNT4|phospho|Y181 NA  
[MXD1|phospho|Y18|Q0 NA  
[SFRS9|phospho|Y179|C NA  
[TRHDE|phospho|Y179|( NA  
[TSA|phospho|Y178|Q( NA  
[C20orf77|phospho|Y16( NA  
[PLXND1|phospho|Y164 NA  
[CIRBP|phospho|Y164|C NA  
[ANKRA2|phospho|Y164 NA  
[MRCKb|phospho|Y163( NA

[SERPINC1|phospho|Y1 NA  
[hnRNP 2H9|phospho|Y NA  
[OSTF1|phospho|Y152|C NA  
[iNOS|phospho|Y151|P3 NA  
[WAVE2|phospho|Y150| NA  
[SCN5A|phospho|Y1494 NA  
[Fyn|phospho|Y150|P06 NA  
[ARAP3|phospho|Y1399 NA  
[SUN2|phospho|Y140|Q NA  
[SCD|phospho|Y14|O00 NA  
[CaMK2-gamma|phospho NA  
[RAC2|phospho|Y139|P1 NA  
[RICS|phospho|Y1385|O NA  
[PLEKHA5|phospho|Y12 NA  
[Erbin|phospho|Y1270|Q NA  
[SFRP1|phospho|Y127|C NA  
[IPMK|phospho|Y127|Q8 NA  
NA NA  
[CYFIP2|phospho|Y113| NA  
[cofilin 1|phospho|Y116|f NA  
[SIPA1L1|phospho|Y116 NA  
[PARVB|phospho|Y116|C NA  
[RBM22|phospho|Y116|C NA  
[LOXHD1|phospho|Y115 NA  
[STX4|phospho|Y115|Q1 NA  
NA NA  
[PDZK1IP1|phospho|Y9 NA  
NA NA  
[PIK4CA|phospho|Y109 NA  
NA NA  
[RasGAP|phospho|Y451 PREDICTED  
NA NA  
[Crk|phospho|Y108|P4 NA  
[LOC200842|phospho|Y NA  
[dynactin 4|phospho|Y10 NA





|                                                 |           |
|-------------------------------------------------|-----------|
| NA                                              | PREDICTED |
| [ <sup>1</sup> ARNT phospho Y561 P <sub>2</sub> | PREDICTED |
| NA                                              | PREDICTED |
| NA                                              | NA        |
| NA                                              | PREDICTED |
| [ <sup>1</sup> PAM phospho Y651 P <sub>1</sub>  | PREDICTED |
| NA                                              | NA        |
| NA                                              | PREDICTED |
| [ <sup>1</sup> UROD phospho Y30 P <sub>0</sub>  | PREDICTED |
| NA                                              | PREDICTED |

|                          |           |
|--------------------------|-----------|
| NA                       | PREDICTED |
| NA                       | NA        |
| NA                       | PREDICTED |
| [IRS-1 phospho Y662 P3   | PREDICTED |
| NA                       | PREDICTED |
| NA                       | NA        |
| [vinculin phospho Y821 F | PREDICTED |
| NA                       | PREDICTED |
| [MDM2 phospho Y394 Q     | PREDICTED |
| [CD3Z phospho Y153 P2    | PREDICTED |
| NA                       | PREDICTED |
| NA                       | PREDICTED |
| [IGF1R phospho Y1346     | PREDICTED |
| NA                       | PREDICTED |
| [ITK phospho Y512 Q08    | PREDICTED |
| [Kv1.3 phospho Y447 P2   | PREDICTED |
| [CSFR phospho Y721 P     | PREDICTED |
| NA                       | PREDICTED |
| [Siva phospho Y48 O15    | PREDICTED |
| [PDK1 phospho Y376 O     | PREDICTED |
| [gastrin phospho Y87 P0  | PREDICTED |
| [SLC4A1 phospho Y8 P     | PREDICTED |
| NA                       | PREDICTED |
| [caveolin-2 phospho Y1   | PREDICTED |
| NA                       | PREDICTED |
| [PDGFRb phospho Y57      | PREDICTED |
| NA                       | NA        |
| [PDGFRb phospho Y751     | PREDICTED |
| [PDGFRb phospho Y77      | PREDICTED |
| [MDH2 phospho Y56 P4     | NA        |

[VIM|phospho|Y60|P086 NA  
[ANKRD39|phospho|Y65 NA  
[NUDT5|phospho|Y74|Q NA  
[GCP2|phospho|Y83|Q9| NA  
[SND1|phospho|Y84|Q1: NA  
[CDV-3|phospho|Y190|C NA  
[RBM30|phospho|Y194|C NA  
[RA70|phospho|Y197|Q5 NA  
NA NA  
[MGC35274|phospho|Y2 NA  
[cortactin|phospho|Y141 NA  
[HIPK1|phospho|Y352|Q NA  
[INPP4|phospho|Y355|Q PREDICTED  
[CstF-50|phospho|Y367| PREDICTED  
[HSH1N1|phospho|Y373| NA  
[CASKIN2|phospho|Y38 NA  
NA NA  
NA NA  
[FLNB|phospho|Y2502|C NA  
NA NA  
[CC2D1A|phospho|Y207 NA  
[KIF23|phospho|Y25|Q8 NA  
NA NA  
[MGC14798|phospho|Y9 NA  
NA PREDICTED  
[PRPF8|phospho|Y394|C PREDICTED  
NA PREDICTED  
NA PREDICTED  
NA PREDICTED  
NA PREDICTED  
NA PREDICTED  
[SPT16|phospho|Y565|C PREDICTED  
NA PREDICTED  
NA PREDICTED

NA PREDICTED  
NA PREDICTED  
[Lck|phospho|Y394|P06z PREDICTED  
NA PREDICTED  
[BUD13|phospho|Y494|C PREDICTED  
NA PREDICTED  
[Dok3|phospho|Y398|Q9 PREDICTED  
NA PREDICTED  
[snRNP 116|phospho|Y3 PREDICTED  
NA PREDICTED  
NA PREDICTED  
NA PREDICTED  
NA PREDICTED  
NA PREDICTED  
NA PREDICTED  
[Eps8|phospho|Y485|Q1 NA  
NA NA  
[FBNP1|phospho|Y584|C NA  
NA NA  
[BCDIN3|phospho|Y661| NA  
NA NA  
NA NA

|                         |           |
|-------------------------|-----------|
| NA                      | NA        |
| NA                      | NA        |
| [K6 phospho Y340 P486   | NA        |
| NA                      | NA        |
| [CD3Z phospho Y123 P2   | PREDICTED |
| NA                      | NA        |
| NA                      | NA        |
| NA                      | NA        |
| [FGFR4 phospho Y754 F   | PREDICTED |
| NA                      | PREDICTED |
| [PPFIBP2 phospho Y835   | PREDICTED |
| NA                      | PREDICTED |
| [coronin 1A phospho Y21 | PREDICTED |
| NA                      | NA        |
| NA                      | PREDICTED |
| [IL-10R-A phospho Y446  | NA        |
| [BLNK phospho Y84 Q81   | NA        |
| [GRAP2 phospho Y45 O    | NA        |
| [Shc1 iso2 phospho Y23  | NA        |
| [PDGFRa phospho Y754    | NA        |
| [SLAM phospho Y327 Q    | NA        |

NA NA  
[MIG-6|phospho|Y394|Q NA  
[LOC200842|phospho|Y NA  
[Dok1|phospho|Y449|Q9 NA  
[Bcr|phospho|Y591|P112 NA  
[PIST|phospho|Y457|Q9 NA  
[Dok1|phospho|Y296|Q9 NA  
[SHP-2|phospho|Y304|P NA  
[CD28|phospho|Y218|P1 NA  
[PXN|phospho|Y88|P49C NA  
[P130Cas|phospho|Y306 NA  
[SLP76|phospho|Y145|C NA  
[CD22|phospho|Y842|P2 NA  
[UBAP2|phospho|Y839|C NA  
[PL10|phospho|Y67|P16 NA  
[PKCD|phospho|Y64|Q0 NA  
[Gab2|phospho|Y452|Q9 NA  
[gp130|phospho|Y767|P NA  
[ALK|phospho|Y1604|Q9 NA  
[KIAA0804|phospho|Y11 PREDICTED  
NA PREDICTED  
NA PREDICTED  
NA PREDICTED  
NA PREDICTED  
NA PREDICTED  
[SPRED1|phospho|Y187 NA  
[MYH8|phospho|Y1855|F NA  
[TPH1|phospho|Y185|P1 NA  
[UROC1|phospho|Y185| NA  
[TPM4|phospho|Y184|P6 NA  
[calponin 1|phospho|Y18 NA  
[KPNA5|phospho|Y17|Q NA  
[PLD2|phospho|Y169|O1 NA  
[Plakophilin 2|phospho|Y NA  
[HIC1|phospho|Y168|Q1 NA  
[KIF1A|phospho|Y1666|C NA  
[CMPK|phospho|Y166|P NA  
[CXCR4|phospho|Y157|F NA  
[PSMD13|phospho|Y156 NA  
[Ran|phospho|Y155|P62 NA  
[CMPK|phospho|Y155|P NA  
[MOGAT2|phospho|Y15 NA  
[PSMA7|phospho|Y153|C NA  
[SUN2|phospho|Y143|Q NA  
[NRBF2|phospho|Y143|C NA  
[CIRBP|phospho|Y141|C NA  
[TAF15|phospho|Y142|C NA  
[CIRBP|phospho|Y141|C NA  
[NDUFA8|phospho|Y141 NA  
[RICS|phospho|Y1315|O NA  
[TRIP6|phospho|Y131|Q NA  
[HER3|phospho|Y1307|F NA









NA PREDICTED  
NA PREDICTED  
NA PREDICTED  
[Jak2|phospho|Y1007|Q6] PREDICTED  
NA PREDICTED  
[VEGFR-1|phospho|Y111|P514] PREDICTED  
NA PREDICTED  
[Blk|phospho|Y388|P514] PREDICTED  
[LEPR|phospho|Y986|P4] PREDICTED  
NA PREDICTED  
[EphB2|phospho|Y780|P] PREDICTED  
NA NA  
[TrkB|phospho|Y705|Q6] PREDICTED  
[Fes|phospho|Y713|P07] PREDICTED  
[CDK6|phospho|Y24|Q0] PREDICTED  
[EphA4|phospho|Y928|G] PREDICTED  
NA PREDICTED  
[Crk|phospho|Y221|P46] PREDICTED  
[EGFR|phospho|Y1171|K] PREDICTED  
[HER2|phospho|Y1139|F] PREDICTED  
[FGFR3|phospho|Y760|F] PREDICTED  
NA PREDICTED  
[PLCG1|phospho|Y783|F] PREDICTED  
[Cbl|phospho|Y700|P226] PREDICTED  
[ERK2|phospho|Y185|P6] PREDICTED  
[CTNNB1|phospho|Y86|K] PREDICTED  
NA PREDICTED  
[JNK1|phospho|Y185|P4] PREDICTED  
NA PREDICTED  
[MEKK2|phospho|Y250|K] PREDICTED  
NA PREDICTED  
[MAPKAPK3|phospho|Y] PREDICTED  
NA NA  
NA PREDICTED  
NA PREDICTED  
[snRNP B2|phospho|Y15] NA  
[FKSG10|phospho|Y158] NA  
NA NA  
[DNAJB4|phospho|Y172] NA  
[Rab7|phospho|Y183|P5] NA  
[PBEF|phospho|Y188|P4] NA  
[DDX5|phospho|Y297|P1] NA  
[ZFP 598|phospho|Y306] NA  
[A6r|phospho|Y309|Q6IE] NA  
[ZNF330|phospho|Y315] NA  
[SRPK2|phospho|Y318|F] NA  
[HSP70RY|phospho|Y33] NA  
[SF3A1|phospho|Y759|C] NA  
[PLCG1|phospho|Y775|F] NA  
[PRP4|phospho|Y849|Q] NA  
[Erbin|phospho|Y972|Q9] NA  
[GRF-1|phospho|Y1105|] NA

[HYD|phospho|Y1746|O9 NA  
NA NA  
[Dok1|phospho|Y362|Q9 PREDICTED  
[PKM2|phospho|Y369|P NA  
[PKM2|phospho|Y389|P NA  
NA NA  
[PIK3R2|phospho|Y458| NA  
[ZNF272|phospho|Y476| NA  
NA PREDICTED  
NA PREDICTED  
NA PREDICTED  
NA PREDICTED  
NA PREDICTED  
NA PREDICTED  
[NCK1|phospho|Y112|P1 PREDICTED  
NA PREDICTED  
NA PREDICTED  
[Crk|phospho|Y136|P46 PREDICTED  
[RSK2|phospho|Y488|P5 PREDICTED  
NA PREDICTED  
NA PREDICTED  
NA PREDICTED  
NA NA  
NA NA  
NA PREDICTED  
[TPI1|phospho|Y47|P60 PREDICTED  
NA PREDICTED  
NA PREDICTED  
NA PREDICTED  
NA PREDICTED  
[SLC7A11|phospho|Y15| PREDICTED  
NA PREDICTED  
NA PREDICTED  
NA PREDICTED  
[KIAA0692|phospho|Y20 PREDICTED  
NA PREDICTED  
NA PREDICTED  
NA PREDICTED

|                        |           |
|------------------------|-----------|
| NA                     | PREDICTED |
| [AKAP9 phospho Y78 Q   | PREDICTED |
| NA                     | NA        |
| NA                     | NA        |
| NA                     | NA        |
| [Cdc2 phospho Y15 P06  | PREDICTED |
| NA                     | NA        |
| [PDGFRb phospho Y57    | PREDICTED |
| [PDGFRa phospho Y731   | NA        |
| NA                     | NA        |
| NA                     | PREDICTED |
| [Ret phospho Y1096 P07 | PREDICTED |

|                        |           |
|------------------------|-----------|
| NA                     | NA        |
| [TXNIP phospho Y378 Q  | PREDICTED |
| NA                     | PREDICTED |
| NA                     | PREDICTED |
| [USP10 phospho Y364 C  | PREDICTED |
| NA                     | PREDICTED |
| [Pyk2 phospho Y881 Q1  | NA        |
| [InsR phospho Y1011 P  | NA        |
| [STAM2 phospho Y374 C  | NA        |
| [EGFR phospho Y1069 F  | NA        |
| [PAG phospho Y314 Q9   | NA        |
| [P130Cas phospho Y66   | NA        |
| [Mpl phospho Y621 Q08  | NA        |
| [SLAP-130 phospho Y5   | NA        |
| [CCR2 phospho Y139 P   | NA        |
| [R-spondin phospho Y11 | NA        |
| [Golgin-84 phospho Y42 | NA        |
| [FGFR3 phospho Y599 F  | NA        |
| [CPSF7 phospho Y72 Q   | NA        |
| [Cas-L phospho Y12 Q1  | NA        |
| [Bcr phospho Y644 P11  | NA        |
| [gp130 phospho Y759 P  | NA        |
| [RBM3 phospho Y129 P   | NA        |
| [P130Cas phospho Y327  | NA        |
| [SNCA phospho Y133 P   | NA        |
| [IKK-beta phospho Y188 | NA        |
| NA                     | NA        |
| [MOK phospho Y161 Q9   | NA        |
| [HER2 phospho Y1139 F  | PREDICTED |
| NA                     | NA        |
| [EGFR phospho Y1110 F  | PREDICTED |
| [Ret phospho Y952 P07  | NA        |
| [USP24 phospho Y1274   | NA        |

[ephrin-B2|phospho|Y31 NA  
[Pyk2|phospho|Y579|Q1 NA  
[CTNND1|phospho|Y228 NA  
NA NA  
NA NA  
NA NA  
NA NA  
NA NA  
NA NA  
[VAV3|phospho|Y173|Q NA  
[zyxin|phospho|Y172|Q1 NA  
[Abl iso1|phospho|Y172| NA  
[PES1|phospho|Y171|O NA  
[MOCS2|phospho|Y170| NA  
[Tel|phospho|Y17|P4121 NA  
[HSPB2|phospho|Y16|Q NA  
[PIK3C2A|phospho|Y15 NA  
[ICK|phospho|Y159|Q9U NA  
[PSMA6|phospho|Y159|f NA  
[Abl iso1|phospho|Y139| NA  
[LRP6|phospho|Y1577|C NA  
[PARN|phospho|Y146|O NA  
[PARP4|phospho|Y1459 NA  
[CCDC50 iso2|phospho| NA  
[hnRNP A0|phospho|Y1 NA  
[CCDC50 iso2|phospho| NA  
[p400|phospho|Y1433|Q NA  
[TAF15|phospho|Y135|C NA  
[radixin|phospho|Y134|P NA  
[ZO1|phospho|Y1334|Q NA  
[GALNT12|phospho|Y13 NA  
[HYAL4|phospho|Y131|C NA  
NA NA  
[SNAP29|phospho|Y122 NA  
[RAPH1|phospho|Y1212 NA  
[PDCD1|phospho|Y121| NA  
[ZNF183|phospho|Y120| NA  
[RPS3|phospho|Y120|P2 NA  
[AurB|phospho|Y12|Q96 NA  
[PSMD10|phospho|Y112 NA  
[GDE|phospho|Y1117|P NA  
[DYRK1A|phospho|Y111 NA  
[TNNC1|phospho|Y111|f NA  
[TES|phospho|Y111|Q9 NA  
[LAT iso2|phospho|Y110 NA  
NA NA  
[hnRNP M|phospho|Y63 NA  
NA NA  
NA NA  
NA NA  
[OCRL|phospho|Y234|Q NA  
NA NA

|                           |           |
|---------------------------|-----------|
| NA                        | NA        |
| NA                        | NA        |
| NA                        | NA        |
| [Btk phospho Y224 Q06     | NA        |
| NA                        | NA        |
| ["tubulin, alpha-1" phosp | NA        |
| [PIK3CB phospho Y102      | NA        |
| [Erbin phospho Y1021 Q    | NA        |
| [GALNT3 phospho Y101      | NA        |
| [IFIH1 phospho Y1015 G    | NA        |
| [VEGFR-2 phospho Y10      | NA        |
| NA                        | NA        |
| NA                        | NA        |
| NA                        | PREDICTED |
| [eEF-2 phospho Y372 P     | PREDICTED |
| NA                        | PREDICTED |
| [PRIC285 phospho Y15      | PREDICTED |
| NA                        | PREDICTED |
| [ITGB4 phospho Y1343      | PREDICTED |
| NA                        | PREDICTED |

|                           |           |
|---------------------------|-----------|
| NA                        | PREDICTED |
| [NUP62 phospho Y422 F     | PREDICTED |
| NA                        | PREDICTED |
| [ezrin phospho Y115 P15   | PREDICTED |
| NA                        | NA        |
| NA                        | PREDICTED |
| [ADD2 phospho Y489 P3     | PREDICTED |
| NA                        | PREDICTED |
| NA                        | PREDICTED |
| NA                        | PREDICTED |
| [PSMA2 phospho Y23 P:     | NA        |
| [ENO1 phospho Y24 P17     | NA        |
| [PSMD14 phospho Y32 C     | NA        |
| ["tubulin, beta-1" phosph | NA        |
| [RPL23 phospho Y38 P6     | NA        |
| [SMAP-5 phospho Y39 C     | NA        |
| NA                        | PREDICTED |



|                        |           |
|------------------------|-----------|
| NA                     | PREDICTED |
| NA                     | NA        |
| NA                     | PREDICTED |
| [TTL1 phospho Y178 O   | PREDICTED |
| NA                     | PREDICTED |
| NA                     | PREDICTED |
| NA                     | PREDICTED |
| [EphB4 phospho Y574 P  | PREDICTED |
| NA                     | NA        |
| NA                     | PREDICTED |
| [Gab1 phospho Y47 Q13  | PREDICTED |
| [Gab1 phospho Y472 Q1  | PREDICTED |
| [STAT5B phospho Y682   | PREDICTED |
| NA                     | PREDICTED |
| NA                     | NA        |
| [TEC phospho Y519 P42  | PREDICTED |
| [Pyk2 phospho Y579 Q1  | PREDICTED |
| [EphA2 phospho Y594 P  | PREDICTED |
| [Etk phospho Y566 P518 | PREDICTED |





|                                                |           |
|------------------------------------------------|-----------|
| NA                                             | PREDICTED |
| [ <sup>53</sup> BP1 phospho Y1523              | PREDICTED |
| NA                                             | PREDICTED |
| [ <sup>adap</sup> tin, beta" phospho           | NA        |
| NA                                             | PREDICTED |
| NA                                             | NA        |
| NA                                             | NA        |
| [ <sup>DPM</sup> 1 phospho Y113 O              | NA        |
| NA                                             | PREDICTED |
| NA                                             | NA        |
| [ <sup>DGK</sup> -I phospho Y400 O             | NA        |
| [ <sup>PKCA</sup>  phospho Y657 P <sub>2</sub> | NA        |
| NA                                             | NA        |
| [ <sup>PDGFR</sup> b phospho Y740              | PREDICTED |
| NA                                             | PREDICTED |
| [ <sup>BYSL</sup>  phospho Y49 Q86             | PREDICTED |
| NA                                             | PREDICTED |
| NA                                             | PREDICTED |
| NA                                             | PREDICTED |
| [ <sup>FRYL</sup>  phospho Y93 O9 <sub>2</sub> | PREDICTED |
| NA                                             | PREDICTED |

NA PREDICTED  
[RICS|phospho|Y1240|O PREDICTED  
NA PREDICTED  
[STAT5B|phospho|Y740 NA  
[emerin|phospho|Y167|P NA  
[PL10|phospho|Y67|P16 NA  
[HER3|phospho|Y1199|F NA  
[Rad52|phospho|Y104|P NA  
[CSF2RB|phospho|Y711 NA  
[VCP|phospho|Y795|Q0 NA  
NA NA  
[LPP|phospho|Y300|Q9 NA  
[NMDAR2B|phospho|Y1 NA  
[cortactin iso2|phospho| NA  
[3BP2|phospho|Y183|P7 NA  
[LOC257106|phospho|Y NA  
[STAM2|phospho|Y371|C NA  
[SPTAN1|phospho|Y107 NA  
[HSP70|phospho|Y525|F NA  
[Grb10|phospho|Y67|Q1 NA  
[EPS15|phospho|Y849|F NA  
[BKR2|phospho|Y347|P NA  
[PDGFRa|phospho|Y101 NA  
[ICAM-1|phospho|Y512|f NA  
NA NA  
[PDGFRa|phospho|Y98 NA  
[BLNK|phospho|Y72|Q8 NA  
[WWOX|phospho|Y33|Q NA  
[Gab1|phospho|Y659|Q1 NA  
[SNCA|phospho|Y125|P NA  
[HER2|phospho|Y1196|F PREDICTED  
[PAK2|phospho|Y130|Q1 NA  
NA NA  
[WDR9|phospho|Y19|Q NA  
[CHI3L1|phospho|Y189|f NA  
[PSMC5|phospho|Y189|i NA  
NA NA  
[MAP1B|phospho|Y1870 NA  
[CaMK1-alpha|phospho| NA  
[GNPNAT1|phospho|Y1 NA  
[PAWR|phospho|Y177|C NA  
[G3BP-2|phospho|Y175| NA  
[N-WASP|phospho|Y17 NA  
[Smc4|phospho|Y175|Q NA  
[hnRNP A2/B1|phospho| NA  
[PSMD13|phospho|Y162 NA









|                          |           |
|--------------------------|-----------|
| NA                       | PREDICTED |
| [piccolo phospho Y4050]  | PREDICTED |
| NA                       | PREDICTED |
| NA                       | NA        |
| NA                       | PREDICTED |
| [IRS-2 phospho Y632 Q6   | PREDICTED |
| NA                       | PREDICTED |
| [HER4 phospho Y1284 C    | PREDICTED |
| NA                       | NA        |
| NA                       | PREDICTED |
| [FGFR3 phospho Y647 F    | PREDICTED |
| NA                       | PREDICTED |
| [p73 phospho Y99 O153    | PREDICTED |
| [STAT6 phospho Y641 F    | PREDICTED |
| [TrkB phospho Y701 Q6    | PREDICTED |
| [DYRK1B phospho Y273     | PREDICTED |
| [Gab1 phospho Y589 Q1    | PREDICTED |
| NA                       | PREDICTED |
| [FGFR1 phospho Y560 /    | PREDICTED |
| [ITGB3 phospho Y773 P    | PREDICTED |
| [InsR iso2 phospho Y134  | PREDICTED |
| [gelsolin phospho Y409 f | PREDICTED |
| [gelsolin phospho Y86 P  | PREDICTED |
| [Ret phospho Y1015 P07   | PREDICTED |
| [Ret phospho Y687 P07    | PREDICTED |
| [FAK phospho Y861 Q05    | PREDICTED |
| [ADAM15 phospho Y715     | PREDICTED |
| [LILRB1 phospho Y533 C   | PREDICTED |
| [Dok1 phospho Y362 Q9    | PREDICTED |



|                        |           |
|------------------------|-----------|
| NA                     | PREDICTED |
| NA                     | PREDICTED |
| [EphA3 phospho Y596 P  | PREDICTED |
| [STAT2 phospho Y690 F  | PREDICTED |
| [DDR1 phospho Y796 Q   | PREDICTED |
| [LAT iso2 phospho Y171 | PREDICTED |
| NA                     | PREDICTED |
| [IFIT3 phospho Y208 O1 | PREDICTED |
| NA                     | PREDICTED |
| [SSRP1 phospho Y438 C  | PREDICTED |
| NA                     | PREDICTED |
| NA                     | PREDICTED |
| NA                     | NA        |
| [CENTB2 phospho Y750   | NA        |
| [CLH-17 phospho Y898   | NA        |

[PCDH1|phospho|Y995|NA  
[talin 1|phospho|Y1116|F PREDICTED  
NA NA  
NA NA  
NA NA  
NA NA  
[CPD|phospho|Y520|O7|NA  
NA NA  
[IRS-2|phospho|Y766|Q9|NA  
[ALK1|phospho|Y375|P3 PREDICTED  
NA PREDICTED  
[HER2|phospho|Y1248|F PREDICTED  
NA NA  
[HS1|phospho|Y198|P14 NA  
[LPP|phospho|Y296|Q93 NA  
[VEGFR-2|phospho|Y111 NA  
NA NA  
[HER2|phospho|Y1221|F PREDICTED

[HER2|phospho|Y923|P| NA  
[FHIT|phospho|Y113|P4| NA  
[IGF1R|phospho|Y1280| NA  
[FLT3|phospho|Y597|P3 NA  
[IGF1R|phospho|Y1280| NA  
[PLCG2|phospho|Y1197 NA  
NA NA  
[MYPT1|phospho|Y911|C NA  
[Jak3|phospho|Y980|P5| PREDICTED  
NA NA  
[Syk|phospho|Y519|P48| NA  
[Abl|phospho|Y134|P005 NA  
[SHP-1|phospho|Y536|P NA  
[Neu3|phospho|Y346|Q9 NA  
[SCAMP3|phospho|Y41| NA  
[EGFR|phospho|Y978|P| NA  
NA NA  
[Fyn|phospho|Y39|P062| NA  
[Syk|phospho|Y346|P48| NA  
[Grb2|phospho|Y209|P6| NA  
[leupaxin|phospho|Y22|C NA  
[afadin|phospho|Y1213|F NA  
[CD19|phospho|Y493|P2 NA  
[ACTN1|phospho|Y193|F NA  
[SAHH|phospho|Y192|P| NA  
[UGT2B10|phospho|Y19 NA  
[Cdb3|phospho|Y191|Q9 NA  
[SFRS6|phospho|Y191|C NA  
[desmoplakin 3|phospho NA  
[MCCC1|phospho|Y181| NA  
[coronin 1A|phospho|Y1| NA  
[elongin C|phospho|Y18| NA  
[PLEKHC1|phospho|Y17 NA  
[ZAP70|phospho|Y178|P NA  
[HS6ST1|phospho|Y178 NA  
[PSMB5|phospho|Y165|F NA  
[afadin|phospho|Y1639|F NA  
[albumin|phospho|Y164| NA  
[GATA6|phospho|Y164|C NA  
[EFS|phospho|Y163|O4| NA  
[BCAP|phospho|Y163|Q| NA  
[BCoR|phospho|Y1527|C NA  
[ITGB4 iso2|phospho|Y1 NA  
[SLIT2|phospho|Y1502|C NA  
[TrpC3|phospho|Y150|Q NA  
[SCN5A|phospho|Y1494 NA  
[E2A|phospho|Y149|P15 NA  
[RICS|phospho|Y1401|O NA  
[CCDC50|phospho|Y14C NA  
[CYLC2|phospho|Y14|Q| NA  
[GIMAP1|phospho|Y14|C NA  
[SNAP23|phospho|Y139 NA

[Src iso2|phospho|Y138| NA  
[IL12A|phospho|Y128|P2 NA  
[hnRNP I|phospho|Y127 NA  
[talin 1|phospho|Y127|Q NA  
[Rictor|phospho|Y1269|C NA  
[FLNA|phospho|Y1260|F NA  
[NEBL|phospho|Y126|O NA  
[CENTD2|phospho|Y431 NA  
[Erbin|phospho|Y1164|Q NA  
[TREM1|phospho|Y116| NA  
[HER3|phospho|Y1159|F NA  
[ARHGEF5|phospho|Y1 NA  
[moesin|phospho|Y115|F NA  
NA NA  
[VAV1|phospho|Y826|P1 NA  
NA NA  
[ZNF91|phospho|Y1078| NA  
[GCET2|phospho|Y106| NA  
[EEF1E1|phospho|Y107| NA  
[POLR1B|phospho|Y106 NA  
[NAALADL2|phospho|Y1 NA  
[CLASP2|phospho|Y105 NA  
[FRK|phospho|Y497|P42 NA  
NA NA  
NA NA  
NA NA  
[TIRAP|phospho|Y106|P PREDICTED  
NA NA  
NA NA  
[TIRAP|phospho|Y106|P PREDICTED  
NA PREDICTED



|                        |           |
|------------------------|-----------|
| NA                     | PREDICTED |
| NA                     | NA        |
| NA                     | PREDICTED |
| ['RNASEH1 phospho Y1'  | PREDICTED |
| NA                     | PREDICTED |
| ['WDR48 phospho Y386   | PREDICTED |
| NA                     | PREDICTED |
| ['Nedd4-BP2 phospho Y1 | PREDICTED |
| NA                     | PREDICTED |
| NA                     | NA        |
| NA                     | PREDICTED |
| ['DYRK1A phospho Y159  | PREDICTED |
| NA                     | PREDICTED |
| ['P130Cas phospho Y670 | PREDICTED |
| NA                     | NA        |
| NA                     | PREDICTED |



NA PREDICTED  
[Kv1.3|phospho|Y135|P2 PREDICTED  
NA NA  
[VEGFR-1|phospho|Y13 PREDICTED  
[FABP3|phospho|Y19|P0 PREDICTED  
NA PREDICTED  
[ITGB1|phospho|Y783|P PREDICTED  
[STAT4|phospho|Y693|C PREDICTED  
NA PREDICTED  
NA PREDICTED  
[Gab1|phospho|Y242|Q1 PREDICTED  
[CSK|phospho|Y416|P41 PREDICTED  
NA PREDICTED  
[CSFR|phospho|Y809|P0 PREDICTED  
NA PREDICTED  
[RGS16|phospho|Y168|C PREDICTED  
[PDK1|phospho|Y9|O15 PREDICTED  
NA PREDICTED  
[SLC4A1|phospho|Y904 PREDICTED  
[PXN|phospho|Y31|P49 PREDICTED  
[VAV2|phospho|Y142|P5 PREDICTED  
[PIK3R1|phospho|Y607|I PREDICTED  
[PDGFRa|phospho|Y574 PREDICTED  
NA NA  
[PDGFRb|phospho|Y76 PREDICTED  
[PDGFRb|phospho|Y85 PREDICTED  
[SF3B4|phospho|Y56|Q1 NA  
[SHP-2|phospho|Y62|Q0 NA  
[DJ-1|phospho|Y67|Q99 NA  
[NSBP1|phospho|Y76|P P NA  
[sid2057|phospho|Y84|O NA  
[emerin|phospho|Y85|P5 NA  
[RBM4|phospho|Y190|Q NA  
[VDAC-1|phospho|Y194 NA  
[RAMA1|phospho|Y280| NA  
[RNPS1|phospho|Y205|C NA  
[DOCK2|phospho|Y221| NA  
[GSK3B|phospho|Y216|F PREDICTED  
[FIP1L1|phospho|Y426|C NA



|                          |           |
|--------------------------|-----------|
| NA                       | PREDICTED |
| [CD34 phospho Y326 Q6    | PREDICTED |
| NA                       | PREDICTED |
| [GALNT2 phospho Y408     | PREDICTED |
| NA                       | NA        |
| [TCF20 phospho Y548 C    | NA        |
| [Ack phospho Y518 Q07    | NA        |
| NA                       | NA        |
| [anillin phospho Y666 Q8 | NA        |
| [Fer phospho Y715 P704   | PREDICTED |
| NA                       | NA        |
| [DSC1 phospho Y34 Q08    | NA        |
| NA                       | NA        |
| NA                       | NA        |
| NA                       | NA        |
| [PXN phospho Y40 P490    | PREDICTED |
| NA                       | NA        |
| [CD3Z phospho Y153 P2    | PREDICTED |

['CD3Z|phospho|Y153|P2 PREDICTED  
 NA NA  
 NA NA  
 ['EGFR|phospho|Y1091|C PREDICTED  
 NA NA  
 NA PREDICTED  
 ['Hcn2|phospho|Y476|O8 PREDICTED  
 NA PREDICTED  
 ['HOOK3|phospho|Y347| PREDICTED  
 NA PREDICTED  
 NA PREDICTED  
 NA PREDICTED  
 NA PREDICTED  
 NA PREDICTED  
 NA NA  
 NA NA  
 NA NA  
 NA NA  
 NA NA  
 ['Bcr|phospho|Y177|P112 NA  
 ['A2LP|phospho|Y309|Q8 NA  
 ['IKK-beta|phospho|Y199 NA  
 ['PIP5K|phospho|Y46|Q9 NA  
 ['KIRREL|phospho|Y724| NA  
 ['Rad51|phospho|Y315|Q NA  
 ['DYRK3|phospho|Y368|C NA  
 ['PLCG1|phospho|Y472|F NA  
 NA PREDICTED  
 ['Gab2|phospho|Y603|Q9 NA  
 ['A2LP|phospho|Y349|Q8 NA  
 ['SLAP-130|phospho|Y65 NA  
 ['HER2|phospho|Y1005|F NA  
 ['IL-10R-A|phospho|Y496 NA  
 NA NA  
 ['SHIP-2|phospho|Y1162 NA  
 ['KIRREL|phospho|Y622| NA  
 ['Dok1|phospho|Y377|Q9 NA

['SLAM|phospho|Y307|Q NA  
 NA NA  
 ['Cbl|phospho|Y672|P22€ NA  
 ['Met|phospho|Y1347|P1€ NA  
 ['MYPT1|phospho|Y901|C NA  
 ['SIT|phospho|Y90|Q9Y3 NA  
 ['Abl|phospho|Y204|P00€ NA  
 NA PREDICTED  
 NA PREDICTED  
 NA PREDICTED  
 NA PREDICTED  
 NA PREDICTED  
 NA PREDICTED  
 ['LMO7|phospho|Y185|Q NA  
 ['MYH1|phospho|Y1856|F NA  
 ['PLEKHC1|phospho|Y18 NA  
 NA NA  
 ['IGF2R|phospho|Y1834| NA  
 ['snRNP B1 iso4|phospho NA  
 ['SPTBN1 iso 2|phospho| NA  
 NA NA  
 ['MOR-1|phospho|Y166|F NA  
 ['PPAP2A|phospho|Y168 NA  
 ['ANKHD1|phospho|Y16€ NA  
 ['hnRNP A1|phospho|Y1€ NA  
 ['FOXJ1|phospho|Y157|C NA  
 ['PTRF|phospho|Y156|Q€ NA  
 ['Cdc37|phospho|Y155|Q NA  
 ['cortactin|phospho|Y154 NA  
 ['MRPL38|phospho|Y154 NA  
 ['GAK|phospho|Y153|O1 NA  
 ['PPIE|phospho|Y143|Q9 NA  
 ['Dicer1|phospho|Y1428|€ NA  
 NA NA  
 ['SKAP55|phospho|Y142 NA  
 NA NA  
 ['ARAP3|phospho|Y1404 NA  
 ['PTPRF|phospho|Y1311 NA  
 ['SH2D4A|phospho|Y131 NA  
 ['CFTR|phospho|Y1307|F NA  
 ['Plakophilin 2|phospho|Y NA  
 ['Erbin|phospho|Y1293|Q NA  
 ['Kv2.1|phospho|Y128|P1 NA  
 ['Dicer1|phospho|Y1194|€ NA  
 ['Plakophilin 2|phospho|Y NA  
 ['LAB|phospho|Y118|Q9€ NA  
 ['ZO2|phospho|Y1178|Q€ NA  
 ['DYSF|phospho|Y1176|C NA  
 ['BCAR3|phospho|Y117|C NA  
 NA NA  
 NA NA  
 NA NA





|                         |           |
|-------------------------|-----------|
| NA                      | PREDICTED |
| [‘LOC148823 phospho Y   | PREDICTED |
| NA                      | NA        |
| NA                      | PREDICTED |
| [‘p47phox phospho Y48 F | PREDICTED |
| NA                      | PREDICTED |
| NA                      | PREDICTED |
| NA                      | PREDICTED |
| [‘Fer phospho Y715 P704 | PREDICTED |
| [‘Raf1 phospho Y340 P04 | PREDICTED |
| NA                      | PREDICTED |
| NA                      | PREDICTED |
| [‘IRS-2 phospho Y978 Q5 | PREDICTED |
| NA                      | PREDICTED |
| [‘EphB1 phospho Y778 P  | PREDICTED |
| NA                      | NA        |



[VEGFR-2|phospho|Y99] PREDICTED  
[IRS-1|phospho|Y460|P3] PREDICTED  
NA PREDICTED  
NA PREDICTED  
NA PREDICTED  
[EGFR|phospho|Y1016|F] PREDICTED  
[EGFR|phospho|Y1197|F] PREDICTED  
[HER2|phospho|Y1221|F] PREDICTED  
[FGFR4|phospho|Y754|F] PREDICTED  
[CSFR|phospho|Y699|P] PREDICTED  
[RasGAP|phospho|Y451] PREDICTED  
[Cbl|phospho|Y774|P226] PREDICTED  
NA PREDICTED  
[ALK1|phospho|Y375|P3] PREDICTED  
[WASP|phospho|Y290|P] PREDICTED  
[JNK2|phospho|Y185|P4] PREDICTED  
NA PREDICTED  
NA PREDICTED  
NA PREDICTED  
NA PREDICTED  
NA NA  
NA PREDICTED  
NA PREDICTED  
[PDCD4|phospho|Y152|K] NA  
[PSMA3|phospho|Y160|F] NA  
["actin, beta"|phospho|Y] NA  
[GBE1|phospho|Y173|Q] NA  
[oligoribonuclease|phospho|Y] NA  
[HT014|phospho|Y188|C] NA  
[Cdc37|phospho|Y298|Q] NA  
[hnRNP F|phospho|Y306] NA  
[IPO7|phospho|Y311|O9] NA  
[ZAP70|phospho|Y315|P] PREDICTED  
[ZAP70|phospho|Y318|P] PREDICTED  
[ZNF264|phospho|Y343|] NA  
[RasGAP 3|phospho|Y76] NA  
[VCP|phospho|Y804|Q0] NA  
[ITSN2|phospho|Y858|Q] NA  
[Erbin|phospho|Y981|Q9] NA  
[Erbin|phospho|Y1107|Q] NA  
[NuMA-1|phospho|Y177] NA  
NA NA  
[P130Cas|phospho|Y362] NA  
[P130Cas|phospho|Y372] NA  
[Dok1|phospho|Y398|Q9] PREDICTED  
[eIF3E|phospho|Y445|P6] NA  
[DAL-1|phospho|Y479|Q] NA  
NA NA  
NA PREDICTED  
NA PREDICTED  
NA PREDICTED  
NA PREDICTED





NA PREDICTED  
NA PREDICTED  
NA PREDICTED  
NA PREDICTED  
NA PREDICTED  
NA PREDICTED  
NA PREDICTED  
NA PREDICTED  
NA PREDICTED  
NA PREDICTED  
NA PREDICTED  
NA PREDICTED  
[CD6|phospho|Y662|P3C NA  
[VEGFR-1|phospho|Y13 NA  
[LAB|phospho|Y136|Q9C NA  
[DAB1|phospho|Y198|P NA  
[BLNK|phospho|Y96|Q8 NA  
[PSMC1|phospho|Y439| NA  
[Rad51|phospho|Y54|Q0 NA  
[HSH1N1|phospho|Y394| NA  
[CrkL|phospho|Y207|P4 NA  
[SOCS3|phospho|Y221| NA  
NA NA  
[PKD1|phospho|Y432|Q NA  
[Lck|phospho|Y192|P06 NA  
[Fyn|phospho|Y30|P062 NA  
[Jak2|phospho|Y813|Q6 NA  
[Met|phospho|Y1365|P0 NA  
[EphB5|phospho|Y611|Q NA  
[PECAM-1|phospho|Y69 NA  
[PKCT|phospho|Y90|Q0 NA  
[ADRB2|phospho|Y326|f NA  
[P130Cas|phospho|Y12 NA  
[Erbin|phospho|Y920|Q9 NA  
NA NA  
[Rad9|phospho|Y28|Q96 NA  
[Jak2|phospho|Y570|O6 NA  
[PPP2CA|phospho|Y307 NA  
[Abl|phospho|Y251|P00 NA  
[FcRII-A|phospho|Y288|f NA  
[CRYGC|phospho|Y62|P NA  
[3BP2|phospho|Y174|P7 NA  
[TIRAP|phospho|Y106|P PREDICTED  
NA NA  
NA NA  
[TIRAP|phospho|Y106|P PREDICTED  
NA NA  
NA NA  
[SLP76|phospho|Y173|G NA  
[requiem|phospho|Y172| NA  
[ITGB4 iso2|phospho|Y1 NA

[HIC1|phospho|Y171|Q1 NA  
[SMARCE1|phospho|Y1 NA  
[CDH6|phospho|Y17|P5 NA  
[EPS8L3|phospho|Y16|C NA  
[IGF2R|phospho|Y1592| NA  
[MYLRF|phospho|Y159|C NA  
[RICS|phospho|Y1589|O NA  
[CTDSP1|phospho|Y158 NA  
[HELZ|phospho|Y1573|F NA  
[RBM3|phospho|Y146|P NA  
[CELSR2|phospho|Y145 NA  
[IGBP1|phospho|Y145|P NA  
[HAGH|phospho|Y145|Q NA  
[LDH-A|phospho|Y144|P NA  
[POLA|phospho|Y1430|F NA  
[CPD|phospho|Y1344|O NA  
[PLEKHA5|phospho|Y13 NA  
[PARN|phospho|Y133|O NA  
[Hrs|phospho|Y132|O14 NA  
[CrkL|phospho|Y132|P4 NA  
NA NA  
NA NA  
[NAV2|phospho|Y1211|C NA  
[mucin 1|phospho|Y120 NA  
[ADRA2B|phospho|Y120 NA  
[OSBP|phospho|Y119|P NA  
NA NA  
[MYBPC3|phospho|Y111 NA  
[desmoplakin|phospho|Y NA  
[epsin 1|phospho|Y111|C NA  
[COX11|phospho|Y111|C NA  
[ARHGAP5|phospho|Y1 NA  
[NCK2|phospho|Y110|O NA  
NA NA  
[Ig-alpha|phospho|Y122| NA  
NA NA



NA PREDICTED  
NA PREDICTED  
NA PREDICTED  
NA NA  
NA PREDICTED  
[ARF GAP 3|phospho|Y37] NA PREDICTED  
NA PREDICTED  
NA PREDICTED  
NA PREDICTED  
NA PREDICTED  
NA PREDICTED  
NA PREDICTED  
NA PREDICTED  
NA PREDICTED  
NA PREDICTED  
NA PREDICTED  
NA PREDICTED  
NA PREDICTED  
NA PREDICTED  
NA PREDICTED  
NA PREDICTED  
NA PREDICTED  
NA PREDICTED  
NA PREDICTED  
NA PREDICTED  
NA PREDICTED  
NA PREDICTED  
[RPP0|phospho|Y24|P0] NA  
[TBC1D19|phospho|Y25] NA  
[RPA40|phospho|Y33|O] NA  
[HGR8|phospho|Y37|Q9] NA  
[RPS13|phospho|Y37|P] NA  
[FLJ20625|phospho|Y40] NA  
NA PREDICTED  
NA NA  
NA PREDICTED  
NA PREDICTED  
NA PREDICTED  
NA PREDICTED  
NA PREDICTED  
NA PREDICTED  
NA PREDICTED

|                        |           |
|------------------------|-----------|
| NA                     | PREDICTED |
| NA                     | NA        |
| NA                     | PREDICTED |
| [EphA4 phospho Y596 G  | PREDICTED |
| NA                     | PREDICTED |
| NA                     | PREDICTED |
| NA                     | PREDICTED |
| [Ret phospho Y905 P079 | PREDICTED |
| NA                     | PREDICTED |
| NA                     | NA        |
| [EphA7 phospho Y614 G  | PREDICTED |
| [FAK phospho Y576 Q06  | PREDICTED |
| [EphA3 phospho Y602 P  | PREDICTED |
| [ROS phospho Y2114 P   | PREDICTED |
| [nAChRA7 phospho Y44   | PREDICTED |
| NA                     | PREDICTED |
| [ROS phospho Y2107 Q   | PREDICTED |
| [Tyro3 phospho Y685 Q  | PREDICTED |
| [PECAM-1 phospho Y71   | PREDICTED |
| [Btk phospho Y222 Q06  | PREDICTED |
| [Lyn phospho Y396 P079 | PREDICTED |
| [Kit phospho Y703 P107 | PREDICTED |
| [EPB41 iso4 phospho Y4 | PREDICTED |
| [ACTN1 phospho Y12 P   | PREDICTED |
| [HS1 phospho Y378 P14  | PREDICTED |
| [PLCG2 phospho Y753 F  | PREDICTED |



NA PREDICTED  
NA PREDICTED  
NA PREDICTED  
NA PREDICTED  
NA NA  
NA PREDICTED  
[FGFR1|phospho|Y637|/ PREDICTED  
[Max|phospho|Y123|P61 NA  
[BAP37|phospho|Y128|C NA  
[FABP5|phospho|Y130|C NA  
[FLJ12886|phospho|Y13 NA  
[RPL7|phospho|Y139|P1 NA  
[Ran|phospho|Y146|P62 NA  
[CrkL|phospho|Y251|P4; NA  
[SRPR|phospho|Y261|P( NA  
[DYRK1B|phospho|Y273 PREDICTED  
[NUDE1|phospho|Y279|( NA  
[SUGT1|phospho|Y285|( NA  
[WASP|phospho|Y290|P PREDICTED  
[Lck|phospho|Y505|P06; NA  
[eIF3-eta|phospho|Y525| NA  
[WRNIP1|phospho|Y562 NA  
[RasGAP|phospho|Y615 NA  
[Dicer1|phospho|Y654|Q NA  
[STAT3|phospho|Y705|F PREDICTED  
NA NA  
[UBAP2|phospho|Y876|( NA  
[GAPDH|phospho|Y313| NA  
[SEPT7|phospho|Y300|C NA  
[CD34|phospho|Y326|Q( PREDICTED  
[FAF1|phospho|Y225|Q( NA  
[A6|phospho|Y327|Q127 NA  
NA PREDICTED  
[Cas-L|phospho|Y241|Q PREDICTED  
NA NA  
[hnRNP 2H9|phospho|Y; PREDICTED  
NA PREDICTED  
[FLJ32786|phospho|Y52 PREDICTED  
NA PREDICTED  
NA PREDICTED



|                       |           |
|-----------------------|-----------|
| NA                    | PREDICTED |
| NA                    | NA        |
| [MVD phospho Y276 P5: | NA        |
| NA                    | NA        |
| [GRM7 phospho Y846 Q  | NA        |
| NA                    | NA        |
| NA                    | NA        |
| [PDGFRb phospho Y751  | PREDICTED |
| NA                    | PREDICTED |
| [TRS85 phospho Y260 C | PREDICTED |
| NA                    | PREDICTED |
| [SPTAN1 phospho Y117  | NA        |
| [CTLA-4 phospho Y218  | NA        |
| NA                    | NA        |

[gp130|phospho|Y905|P NA  
[HER2|phospho|Y1025|F NA  
[HER2|phospho|Y1112|F NA  
[gp130|phospho|Y814|P NA  
[SIT|phospho|Y148|Q9Y NA  
[abLIM|phospho|Y461|O NA  
[LAIR-1|phospho|Y251|C NA  
NA NA  
[CD19|phospho|Y531|P1 NA  
NA NA  
[PDGFRa|phospho|Y768 NA  
[FGFR1|phospho|Y463|F NA  
[CD45|phospho|Y1216|F NA  
NA NA  
[RACK1|phospho|Y194|F NA  
[TEC|phospho|Y206|P42 NA  
[Brk|phospho|Y447|Q138 NA  
[PTEN|phospho|Y240|P6 NA  
[CD3Z|phospho|Y64|P20 NA  
[CLIM1|phospho|Y320|O NA  
[PDGFRa|phospho|Y762 NA  
[ITGB1|phospho|Y795|P NA  
[SHEP1|phospho|Y787|C NA  
[USP6NL|phospho|Y720 NA  
[EGFR|phospho|Y1138|F NA  
[CK2-A1|phospho|Y255| NA  
[SOCS3|phospho|Y204|C NA  
[MAP1B|phospho|Y1892 NA  
[MYH9|phospho|Y189|P NA  
[MAP1B|phospho|Y1889 NA  
NA NA  
[ATP7B|phospho|Y187|F NA  
[Plakophilin 1|phospho|Y NA  
[CTNNA1|phospho|Y177 NA  
[ARFGEF2|phospho|Y17 NA  
[Skip|phospho|Y176|Q13 NA  
[SEC11L3|phospho|Y17 NA  
[CTNND1|phospho|Y174 NA  
[Abl iso1|phospho|Y174| NA  
[PKR|phospho|Y162|P15 NA  
[NCKIPSD iso2|phospho NA  
[SRGAP2|phospho|Y161 NA  
[FLNA|phospho|Y1603|F NA  
[CIRBP|phospho|Y160|C NA  
[GPR10|phospho|Y160|F NA  
[RPL13A|phospho|Y148| NA  
[TrpC3|phospho|Y148|Q NA  
[PIK4CA|phospho|Y147 NA  
[Lmr2|phospho|Y1468|Q NA  
[CELSR2|phospho|Y145 NA  
[SET|phospho|Y146|Q01 NA  
[HAPIP|phospho|Y1375| NA



['DBNL|phospho|Y345|Q5'] PREDICTED  
 NA PREDICTED  
 ['GALNT2|phospho|Y396'] PREDICTED  
 NA PREDICTED  
 ['LIN9|phospho|Y183|Q5'] PREDICTED  
 ['HPS3|phospho|Y506|Q5'] PREDICTED  
 NA PREDICTED  
 NA PREDICTED  
 NA PREDICTED

|                           |           |
|---------------------------|-----------|
| NA                        | PREDICTED |
| NA                        | NA        |
| NA                        | PREDICTED |
| NA                        | NA        |
| [^eIF4H phospho Y11 Q1 NA | NA        |
| [^TRXR1 phospho Y13 Q NA  | NA        |
| [^HSC70 phospho Y15 P NA  | NA        |
| [^TfR phospho Y20 P027 NA | NA        |
| NA                        | PREDICTED |
| NA                        | NA        |
| NA                        | PREDICTED |
| [^DLG3 phospho Y600 Q NA  | PREDICTED |
| NA                        | PREDICTED |
| NA                        | NA        |
| NA                        | PREDICTED |

|                           |           |
|---------------------------|-----------|
| NA                        | PREDICTED |
| [SRGAP2 phospho Y699 G    | PREDICTED |
| NA                        | PREDICTED |
| [VEGFR-1 phospho Y121 G   | PREDICTED |
| NA                        | PREDICTED |
| NA                        | NA        |
| [EphA7 phospho Y791 G     | PREDICTED |
| [LAT iso2 phospho Y127 G  | PREDICTED |
| NA                        | PREDICTED |
| NA                        | PREDICTED |
| [ROS phospho Y2110 P0     | PREDICTED |
| [DDR1 phospho Y792 Q0     | PREDICTED |
| NA                        | PREDICTED |
| [IGF1R phospho Y1161 G    | PREDICTED |
| [InsR iso2 phospho Y132 G | PREDICTED |
| [gelsolin phospho Y465 F  | PREDICTED |
| [ENO1 phospho Y43 P06     | PREDICTED |
| [Ret phospho Y1029 P07    | PREDICTED |
| [Ret phospho Y826 P07     | PREDICTED |
| [FAK phospho Y925 Q05     | PREDICTED |
| NA                        | PREDICTED |
| [LILRB1 phospho Y614 C    | PREDICTED |
| [Dok1 phospho Y398 Q9     | PREDICTED |
| NA                        | NA        |
| NA                        | PREDICTED |
| [TIE2 phospho Y992 Q0     | PREDICTED |
| [NRAGE phospho Y92 C      | NA        |
| [emerin phospho Y94 P5    | NA        |
| [Bid phospho Y54 P559     | NA        |
| [RPL31 phospho Y103 P     | NA        |
| [Dcp1b phospho Y110 Q     | NA        |
| [TBCB phospho Y114 Q      | NA        |
| [endofin phospho Y219 C   | NA        |
| [CTNND1 phospho Y221      | PREDICTED |
| [HSP60 phospho Y227 F     | NA        |



[WDR1|phospho|Y237|C NA  
[hnRNP H|phospho|Y246| NA  
[AIP|phospho|Y247|Q00 NA  
[G6PD|phospho|Y400|Q1 NA  
[SF3A3|phospho|Y414|C NA  
[EHD4|phospho|Y451|Q1 NA  
[similar to pyruvate kinase NA  
[GIT2|phospho|Y484|Q1 NA  
[GIT2|phospho|Y492|Q1 NA  
NA NA  
NA NA  
[PHLDB2|phospho|Y131 NA  
[CDV-3|phospho|Y190|C NA  
[ANXA2|phospho|Y237|F NA  
[LIM|phospho|Y250|Q96 NA  
[HMFN0672|phospho|Y2 NA  
NA PREDICTED  
[DDR1|phospho|Y513|Q1 PREDICTED  
[EphA5|phospho|Y650|P PREDICTED  
[TIE2|phospho|Y897|Q0 PREDICTED  
[TIE2|phospho|Y1111|Q1 PREDICTED  
NA PREDICTED  
NA PREDICTED  
[CHERP|phospho|Y894| PREDICTED  
NA PREDICTED  
NA PREDICTED  
NA PREDICTED  
NA PREDICTED



[ARHGAP5|phospho|Y3| NA  
NA NA  
[AMPK1|phospho|Y432| NA  
NA NA  
NA NA  
NA NA  
[InsR iso2|phospho|Y13| PREDICTED  
[CSFR|phospho|Y699|P| PREDICTED  
[Kit|phospho|Y570|P107| PREDICTED  
NA PREDICTED  
[PEAR1|phospho|Y943|P| PREDICTED  
NA PREDICTED  
[HER4|phospho|Y1284|P| PREDICTED  
[EGFR|phospho|Y727|P| NA  
[Plakophilin 4|phospho|Y NA  
[EGFR|phospho|Y1125|F NA  
[APS|phospho|Y618|Q9| NA  
[SIT|phospho|Y188|Q9Y| NA  
[HER3|phospho|Y1328|F NA  
[VEGFR-2|phospho|Y10| NA  
[A2LP|phospho|Y264|Q8| NA  
[Lck|phospho|Y505|P06| NA  
[FCRII-B iso2|phospho|Y NA  
[VEGFR-2|phospho|Y80| NA  
[CLH-17|phospho|Y147| NA  
[SHIP-2|phospho|Y886|P| NA  
[CD3D|phospho|Y149|P| NA  
[Jak3|phospho|Y980|P5| NA  
[GCSFR|phospho|Y727|P| NA  
[PIK3R1|phospho|Y580|P| NA  
[SCAMP3|phospho|Y35|P| NA

[CD3Z|phospho|Y72|P< NA  
[USP6NL|phospho|Y592 NA  
[PTEN|phospho|Y315|P< NA  
[CD3D|phospho|Y160|P< NA  
[NMDAR2B|phospho|Y1 NA  
NA NA  
[PKCD|phospho|Y512|P< NA  
[FLT3|phospho|Y589|P3 NA  
[PIST|phospho|Y457|Q9 NA  
[CD28|phospho|Y209|P1 NA  
[ALK|phospho|Y1507|Q< NA  
[MAP1B|phospho|Y1923 NA  
[SSBP2|phospho|Y192|F NA  
[MYH9|phospho|Y192|P< NA  
[similar to FAM35A|phos NA  
[SLC26A1|phospho|Y19 NA  
[eIF3S6IP|phospho|Y19| NA  
[BCS1L|phospho|Y181|C NA  
[tau iso9|phospho|Y18|N NA  
[syndecan-2|phospho|Y1 NA  
[ephexin1|phospho|Y87| NA  
[cortactin|phospho|Y178 NA  
[talin 1|phospho|Y1777|C NA  
[PLK3|phospho|Y164|Q< NA  
NA NA  
[PLK3|phospho|Y164|Q< NA  
[ZAP70|phospho|Y164|P NA  
[TJ6|phospho|Y163|Q9Y NA  
[TPM1|phospho|Y162|P< NA  
NA NA  
[RA70|phospho|Y151|Q< NA  
[MYH9|phospho|Y150|P< NA  
[PABPC5|phospho|Y15|< NA  
[ITGB4 iso2|phospho|Y1 NA  
[NOLA1|phospho|Y149|< NA  
[NSD1|phospho|Y1400|< NA  
[DBNL|phospho|Y140|Q< NA  
[Trb2|phospho|Y14|Q9< NA  
[Dok2|phospho|Y139|O6 NA  
[MAP1A|phospho|Y1388 NA  
[SLC25A2|phospho|Y13 NA  
[SFRS10|phospho|Y128 NA  
[GPSM1|phospho|Y127| NA  
[RPS10|phospho|Y127|F NA  
[HER4|phospho|Y1262|< NA  
[MINK|phospho|Y1260|< NA  
[NYREN18|phospho|Y12 NA  
[COX11|phospho|Y117|< NA  
[SHIP|phospho|Y1160|Q NA  
[NR2C2|phospho|Y116|F NA  
[DYSF|phospho|Y1159|< NA  
[ARHGEF5|phospho|Y1 NA







NA PREDICTED  
[IRS-2|phospho|Y675|Q9 PREDICTED  
NA PREDICTED  
NA NA  
[EphA2|phospho|Y921|P PREDICTED  
NA PREDICTED  
[VEGFR-1|phospho|Y12 PREDICTED  
[HER4|phospho|Y1258|C PREDICTED  
NA PREDICTED  
NA PREDICTED  
NA PREDICTED  
NA PREDICTED  
[Gab1|phospho|Y627|Q1 PREDICTED  
[EphB4|phospho|Y590|P PREDICTED  
[PKCD|phospho|Y187|P PREDICTED  
[PLSCR1|phospho|Y74|C PREDICTED  
[RGS16|phospho|Y177|C PREDICTED  
NA PREDICTED  
[calmodulin|phospho|Y9 PREDICTED  
[ER-alpha|phospho|Y53 PREDICTED  
[GSK3B|phospho|Y216|F PREDICTED  
[VAV2|phospho|Y172|P5 PREDICTED  
[PDGFRb|phospho|Y10 PREDICTED  
[PDGFRb|phospho|Y71 PREDICTED  
NA NA  
[PDGFRb|phospho|Y771 PREDICTED  
[caveolin-1|phospho|Y14 PREDICTED  
[FBP1|phospho|Y58|Q9 NA  
[RPL18a|phospho|Y63|C NA  
[talin 1|phospho|Y70|Q9 NA  
NA NA  
[GMF-beta|phospho|Y83 NA  
[SF3B14|phospho|Y86|C NA  
[Dcp1b|phospho|Y191|Q NA  
[VDAC-3|phospho|Y195| NA  
[RPL7|phospho|Y195|P1 NA  
[Ets-1|phospho|Y205|P1 NA  
[DOCK2|phospho|Y224| NA  
[Hrs|phospho|Y216|O14 NA  
[STI1|phospho|Y354|P3 NA  
[HIPK3|phospho|Y359|Q NA  
[CD46 iso4|phospho|Y3 NA  
[PRI2|phospho|Y381|P4 NA  
[Abl iso1|phospho|Y393| PREDICTED  
[abLIM|phospho|Y396|O NA  
NA NA  
[ANXA2|phospho|Y23|P PREDICTED  
[HSPC227|phospho|Y10 NA  
["similar to actin, gamma NA  
[VASP|phospho|Y38|P5 NA  
[DCTD|phospho|Y79|P3 NA  
[PKM2|phospho|Y104|P NA



|                        |           |
|------------------------|-----------|
| NA                     | PREDICTED |
| NA                     | NA        |
| NA                     | PREDICTED |
| NA                     | PREDICTED |
| [MEKK4 phospho Y140 C  | PREDICTED |
| NA                     | PREDICTED |
| [LAT iso2 phospho Y191 | PREDICTED |
| [ZAP70 phospho Y492 P  | PREDICTED |
| [Brk phospho Y342 Q138 | PREDICTED |
| NA                     | PREDICTED |
| [TBC1D7 phospho Y13 C  | PREDICTED |
| NA                     | PREDICTED |



|                          |           |
|--------------------------|-----------|
| NA                       | PREDICTED |
| NA                       | NA        |
| NA                       | NA        |
| NA                       | NA        |
| NA                       | PREDICTED |
| NA                       | NA        |
| NA                       | NA        |
| NA                       | NA        |
| [CD33 phospho Y340 P2    | NA        |
| [TLR3 phospho Y759 O1    | NA        |
| [Siglec-10 phospho Y667  | NA        |
| [ITK phospho Y180 Q08    | NA        |
| NA                       | NA        |
| [Src phospho Y215 P12    | NA        |
| [RBM12 phospho Y526 K    | NA        |
| [SHIP-2 phospho Y1135    | NA        |
| NA                       | NA        |
| [EGFR phospho Y1171 K    | PREDICTED |
| NA                       | NA        |
| [FGFR1 phospho Y585 F    | NA        |
| [STAT5B phospho Y743     | NA        |
| [Dok2 phospho Y299 O6    | NA        |
| NA                       | NA        |
| [DAG1 phospho Y890 Q     | NA        |
| [TERT phospho Y707 O     | NA        |
| [PKCD phospho Y313 Q     | NA        |
| [mucin 1 phospho Y122    | NA        |
| [ITGB3 phospho Y784 O    | NA        |
| [CD6 phospho Y629 P3     | NA        |
| [VAV1 phospho Y142 P1    | NA        |
| [Plakophilin 4 phospho Y | NA        |
| NA                       | PREDICTED |

|                           |           |
|---------------------------|-----------|
| NA                        | PREDICTED |
| [epsin 2 phospho Y186 C   | NA        |
| [DAB1 phospho Y185 Q      | NA        |
| [RAI1 phospho Y185 Q7     | NA        |
| [SEC11L3 phospho Y18      | NA        |
| [SHRM phospho Y1833       | NA        |
| [MMP2 phospho Y182 P      | NA        |
| [MAP1A phospho Y1696      | NA        |
| [MYO9B phospho Y168       | NA        |
| [NUCB1 phospho Y168       | NA        |
| [NSFL1C phospho Y167      | NA        |
| [Plakophilin 2 phospho Y  | NA        |
| [Rif1 phospho Y1659 Q5    | NA        |
| [SNAPC3 phospho Y157      | NA        |
| [RhoA phospho Y156 P6     | NA        |
| [HIC1 phospho Y155 Q1     | NA        |
| [HePTP phospho Y154 F     | NA        |
| [FLNB phospho Y1530 C     | NA        |
| [PCTAIRE3 phospho Y1      | NA        |
| [NIT1 phospho Y143 Q8     | NA        |
| [ZO1 phospho Y1423 Q      | NA        |
| [ACP1 phospho Y142 P      | NA        |
| [BAI3 phospho Y1419 O     | NA        |
| [PMPCB phospho Y141       | NA        |
| [latrophilin 2 phospho Y1 | NA        |
| [PARD3 phospho Y1310      | NA        |
| [VMD2L3 phospho Y131      | NA        |
| [Erbin phospho Y1304 Q    | NA        |
| [SULT4A1 phospho Y13      | NA        |
| [PHF3 phospho Y1291 C     | NA        |
| [Mx1 phospho Y128 P20     | NA        |
| [LAB phospho Y118 Q9      | NA        |
| [OSBP phospho Y119 P      | NA        |
| [Cas-L phospho Y118 Q     | NA        |
| NA                        | NA        |
| [HIVEP2 phospho Y117      | NA        |
| [RBM3 phospho Y117 P      | NA        |
| NA                        | NA        |
| [SHP-1 phospho Y301 P     | NA        |
| NA                        | NA        |
| NA                        | NA        |
| [PTPRG phospho Y906       | NA        |
| NA                        | NA        |
| [FAK phospho Y407 Q       | NA        |
| NA                        | NA        |
| [HS1 phospho Y378 P14     | PREDICTED |

|                         |           |
|-------------------------|-----------|
| NA                      | PREDICTED |
| NA                      | PREDICTED |
| NA                      | NA        |
| [ACR phospho Y110 P10   | NA        |
| [NUDT11 phospho Y11 K   | NA        |
| [Arp3 phospho Y109 P61  | NA        |
| [NARG2 phospho Y108 K   | NA        |
| [CK2-B phospho Y108 P   | NA        |
| [restin phospho Y108 P3 | NA        |
| [MYBPC2 phospho Y100    | NA        |
| [PAR3-beta phospho Y10  | NA        |
| NA                      | PREDICTED |
| [ZDHC5 phospho Y456     | PREDICTED |
| NA                      | PREDICTED |
| [HSPC227 phospho Y18    | PREDICTED |
| NA                      | PREDICTED |
| NA                      | PREDICTED |
| [CTNND1 phospho Y296    | PREDICTED |
| NA                      | PREDICTED |
| [RBM8A phospho Y54 Q    | PREDICTED |
| NA                      | PREDICTED |
| NA                      | PREDICTED |
| NA                      | PREDICTED |
| [CENTB2 phospho Y742    | PREDICTED |
| NA                      | PREDICTED |

|                                      |           |
|--------------------------------------|-----------|
| NA                                   | PREDICTED |
| NA                                   | NA        |
| [ <sup>3</sup> matrin phospho Y213]  | PREDICTED |
| [ <sup>7</sup> SLC4A7 phospho Y127]  | PREDICTED |
| NA                                   | NA        |
| NA                                   | PREDICTED |
| [ <sup>1</sup> GAPDH phospho Y41 P   | NA        |
| [ <sup>5</sup> SMAP-5 phospho Y44 C  | NA        |
| [ <sup>2</sup> ELMO2 phospho Y48 Q   | NA        |
| [ <sup>4</sup> SFRS4 phospho Y53 Q   | NA        |
| [ <sup>13</sup> TRIP13 phospho Y58 Q | NA        |
| [ <sup>1</sup> CBR1 phospho Y193 P   | NA        |
| NA                                   | PREDICTED |
| NA                                   | NA        |
| NA                                   | PREDICTED |
| NA                                   | PREDICTED |

|                         |           |
|-------------------------|-----------|
| NA                      | PREDICTED |
| [DOCK4 phospho Y1831    | PREDICTED |
| NA                      | NA        |
| NA                      | PREDICTED |
| [Scribble phospho Y32 C | PREDICTED |
| NA                      | PREDICTED |
| [ERK5 phospho Y220 Q    | PREDICTED |
| [Gab1 phospho Y307 Q1   | PREDICTED |
| [GIRK1 phospho Y12 NF   | PREDICTED |
| NA                      | NA        |
| [SLC4A1 phospho Y46 F   | PREDICTED |
| NA                      | PREDICTED |
| NA                      | PREDICTED |
| NA                      | PREDICTED |
| [HLAA phospho Y344 P    | PREDICTED |
| [EGFR phospho Y1091 C   | PREDICTED |
| [EpoR phospho Y367 P1   | PREDICTED |
| [HER2 phospho Y1248 F   | PREDICTED |
| [Src phospho Y415 P00   | PREDICTED |
| [CSFR phospho Y706 P    | PREDICTED |
| [CD3Z phospho Y111 P    | PREDICTED |
| [CDK2 phospho Y15 P9    | PREDICTED |

NA PREDICTED  
[STAT1|phospho|Y701|F PREDICTED  
[ZAP70|phospho|Y315|P PREDICTED  
[PXN|phospho|Y118|Q8' PREDICTED  
NA PREDICTED  
NA PREDICTED  
NA PREDICTED  
NA PREDICTED  
NA NA  
NA PREDICTED  
NA PREDICTED  
[TIP20|phospho|Y153|O NA  
[DBNL|phospho|Y162|Q' NA  
[RP1|phospho|Y167|Q1' NA  
[hnRNP A0|phospho|Y1' PREDICTED  
[ERK2|phospho|Y185|P' PREDICTED  
[SF2|phospho|Y188|Q07 NA  
[coronin 1C|phospho|Y3' NA  
[SNAP-gamma|phospho NA  
[SSRP1|phospho|Y311|C NA  
[LPP|phospho|Y317|Q9' NA  
[GDI1|phospho|Y333|P3 NA  
[GART|phospho|Y348|P' NA  
[PLCG1|phospho|Y771|F PREDICTED  
[FAM62A|phospho|Y822 NA  
[SND1|phospho|Y883|Q' NA  
[FAM62A|phospho|Y100 NA  
[CAMSAP1|phospho|Y1' NA  
[PIP5K|phospho|Y1772|C NA  
NA NA  
[PABP 1|phospho|Y364| NA  
[HZF2|phospho|Y520|Q1 NA  
[mahogunin|phospho|Y3 NA  
[mahogunin|phospho|Y3 NA  
[hnRNP U|phospho|Y47' NA  
[HSP90B|phospho|Y483 NA  
NA PREDICTED  
[RSK2|phospho|Y356|P' PREDICTED  
NA PREDICTED  
NA PREDICTED  
NA PREDICTED  
NA PREDICTED  
NA NA  
NA PREDICTED







NA PREDICTED

[Cdc42|phospho|Y64|P6 NA  
[VAV1|phospho|Y174|P1 NA  
[LAB|phospho|Y193|Q9C NA  
[LAB|phospho|Y233|Q9C NA  
[Shc1 iso2|phospho|Y23 NA  
[Kit|phospho|Y900|P107: NA  
NA NA  
[TRPV4|phospho|Y253|C NA  
[Lasp-1|phospho|Y171|C NA  
[PKCD|phospho|Y565|P: NA  
[ATG3|phospho|Y18|Q9I NA  
[RSK2|phospho|Y707|Pε NA  
[FRS2|phospho|Y391|Qξ NA  
[SHIP-2|phospho|Y986|C NA  
[Jak3|phospho|Y785|P5ζ NA  
[FcRII-A|phospho|Y281|I NA  
[CD28|phospho|Y206|P1 NA  
[LAIR-1|phospho|Y281|C NA  
[Ack|phospho|Y826|Q07 NA  
[ZDHHC8|phospho|Y66ξ NA  
[CD33|phospho|Y358|P2 NA  
[Fyn|phospho|Y28|P396ξ NA  
[DUSP3|phospho|Y138|f NA  
[CD28|phospho|Y191|P1 NA  
[Met|phospho|Y1001|P1ι NA  
NA NA  
[IGF1R|phospho|Y980|P NA  
[CRYGB|phospho|Y62|P NA  
[Dok1|phospho|Y408|P9 NA  
[catalase|phospho|Y385| NA  
NA NA  
NA NA  
NA NA  
NA NA  
NA NA  
NA NA  
[CGB|phospho|Y173|P0ξ NA  
[PSMD13|phospho|Y172 NA  
[RICS|phospho|Y1712|O NA  
[matrin 3|phospho|Y171| NA  
[eIF3S6|P|phospho|Y17| NA  
[CaMK2-beta|phospho|Y NA  
[ITGB4 iso2|phospho|Y1 NA  
[TSRC1|phospho|Y159|C NA  
[neurabin 1|phospho|Y1ξ NA  
[Plxna1|phospho|Y1586| NA  
[YB-1|phospho|Y158|P6ξ NA  
[TRIP6|phospho|Y157|Q NA  
[NDUFS7|phospho|Y146 NA  
[SYCP2|phospho|Y1453 NA  
[ARD1A|phospho|Y145|f NA

[ZNF331|phospho|Y144| NA  
[PIAS1|phospho|Y144|O NA  
NA NA  
[ZO1|phospho|Y1342|QC NA  
[GLA|phospho|Y134|P0€ NA  
[MECT1|phospho|Y133|€ NA  
NA NA  
[PSMC3|phospho|Y132|I NA  
[LAMA4|phospho|Y1317 NA  
[DNMBP|phospho|Y121€ NA  
[BRSK1|phospho|Y121|€ NA  
[ITGB4|phospho|Y1207|I NA  
[Plakophilin 1|phospho|Y NA  
[CRISP3|phospho|Y120| NA  
NA NA  
[ZO2|phospho|Y1118|Q€ NA  
[Plakophilin 4|phospho|Y NA  
[IRS-4|phospho|Y111|O1 NA  
[EEF1E1|phospho|Y111| NA  
[COL16A1|phospho|Y11 NA  
[LAB|phospho|Y110|Q9€ NA  
NA NA  
[laminin receptor 1|phos| NA  
NA NA  
[Cas-L|phospho|Y132|Q NA  
NA NA  
NA NA  
NA NA  
NA PREDICTED  
NA NA  
[TIE1|phospho|Y1027|P€ NA  
[PTPRT|phospho|Y1022 NA  
[GRSF1|phospho|Y102|€ NA  
[OR2G3|phospho|Y102|€ NA  
[PKR|phospho|Y101|P1€ NA  
[ZSWIM5|phospho|Y100 NA  
NA NA





NA PREDICTED  
NA PREDICTED  
NA NA  
NA PREDICTED  
[HER2|phospho|Y877|P] PREDICTED  
[EphB4|phospho|Y774|P] PREDICTED  
[HER2|phospho|Y1221|F] PREDICTED  
NA PREDICTED  
[IRS-1|phospho|Y895|P] PREDICTED  
[TrkC|phospho|Y709|Q] PREDICTED  
[Ig-alpha|phospho|Y182|] PREDICTED  
NA NA  
[EphB4|phospho|Y596|P] PREDICTED  
[EphA1|phospho|Y605|P] PREDICTED  
[Btk|phospho|Y550|Q] PREDICTED  
[LTK|phospho|Y676|P] PREDICTED  
[PDGFRa|phospho|Y849] PREDICTED  
[Abl|phospho|Y432|P] PREDICTED  
[VEGFR-1|phospho|Y10] PREDICTED  
[Mer|phospho|Y753|Q] PREDICTED  
[CDK5|phospho|Y15|Q] PREDICTED  
[EphA1|phospho|Y599|P] PREDICTED  
[tau iso9|phospho|Y197|] PREDICTED  
[Kit|phospho|Y721|P] PREDICTED  
[FGFR1|phospho|Y673|] PREDICTED  
[Src|phospho|Y526|P] PREDICTED  
[HS1|phospho|Y397|P] PREDICTED  
[PLCG2|phospho|Y759|F] PREDICTED  
[14-3-3 eta|phospho|Y21] PREDICTED  
[APP iso2|phospho|Y682] PREDICTED  
NA PREDICTED  
NA NA  
NA NA  
NA PREDICTED  
NA PREDICTED  
[EB1|phospho|Y124|Q] NA  
[profilin 1|phospho|Y128] NA  
[C1orf52|phospho|Y132|] NA  
[cofilin 1|phospho|Y139|F] NA  
[CLIM1|phospho|Y143|O] NA

[SQSTM1|phospho|Y148|NA  
[RPS3a|phospho|Y255|F|NA  
[APE1|phospho|Y261|P2|NA  
[FLJ39829|phospho|Y24|NA  
[ZNF24|phospho|Y279|P|NA  
[FLJ11305|phospho|Y28|NA  
["actin, beta"|phospho|Y2|NA  
[CCT-theta|phospho|Y50|NA  
[Fyn|phospho|Y531|P06|PREDICTED  
[FAK|phospho|Y576|Q05|PREDICTED  
[DBN1|phospho|Y621|Q|NA  
[ACLY|phospho|Y672|Q5|NA  
[PECAM-1|phospho|Y71|PREDICTED  
NA NA  
[FTase-beta|phospho|Y3|NA  
[ALK|phospho|Y1131|Q9|NA  
[eIF3-beta|phospho|Y30|NA  
[CTNND1|phospho|Y334|NA  
[Dok1|phospho|Y341|Q9|NA  
[ARF GAP 3|phospho|Y3|NA  
NA PREDICTED  
[Jun|phospho|Y170|P054|PREDICTED  
NA PREDICTED  
NA PREDICTED  
NA PREDICTED  
NA NA  
NA PREDICTED  
NA PREDICTED  
NA PREDICTED  
[WDR45L|phospho|Y19|PREDICTED  
NA PREDICTED  
NA PREDICTED  
NA PREDICTED  
NA PREDICTED  
NA PREDICTED  
NA PREDICTED  
[DDR1|phospho|Y796|Q|PREDICTED  
NA PREDICTED  
NA PREDICTED  
NA PREDICTED  
NA PREDICTED  
NA PREDICTED





|                        |           |
|------------------------|-----------|
| NA                     | NA        |
| NA                     | NA        |
| NA                     | NA        |
| [CK2-A2 phospho Y256   | NA        |
| NA                     | NA        |
| [PDGFRb phospho Y100   | PREDICTED |
| NA                     | PREDICTED |
| [RasGAP 3 phospho Y66  | PREDICTED |
| NA                     | PREDICTED |
| [CTNNB1 phospho Y142   | NA        |
| [NMDAR2B phospho Y1    | NA        |
| [LAT iso2 phospho Y132 | NA        |
| [SLP76 phospho Y128 G  | NA        |
| [Ret phospho Y981 P07  | NA        |
| [R-Ras phospho Y66 P1  | NA        |
| [PAG phospho Y227 Q9I  | NA        |
| [ARHGAP12 phospho Y    | NA        |
| [IL7R phospho Y449 P1  | NA        |
| [CRYBB3 phospho Y29 I  | NA        |
| [P130Cas phospho Y41   | NA        |
| [Abl iso1 phospho Y253 | NA        |
| [SSTR2 phospho Y228 F  | NA        |
| NA                     | NA        |
| [BKR2 phospho Y161 P2  | NA        |

[catalase|phospho|Y230| NA  
[PKD1|phospho|Y463|Q NA  
[ARHGAP5|phospho|Y3 NA  
[IGF1R|phospho|Y973|P NA  
[CD5|phospho|Y465|P0 NA  
[CRYGB|phospho|Y65|P NA  
[Cas-L|phospho|Y166|Q NA  
[SSTR2|phospho|Y312|F NA  
[PAR1|phospho|Y383|P2 NA  
[TIE2|phospho|Y1106|Q NA  
[EGFR|phospho|Y1016|f PREDICTED  
[VAV1|phospho|Y160|P2 NA  
[AGA|phospho|Y178|P2 NA  
[CK2-A2|phospho|Y256| NA  
[Tyk2|phospho|Y1047|Q NA  
[CAD|phospho|Y1890|P2 NA  
[SNAP29|phospho|Y189 NA  
[MAP1B|phospho|Y1887 NA  
[MALT1|phospho|Y188|C NA  
[Blk|phospho|Y186|P514 NA  
[PQBP1|phospho|Y187|C NA  
[ERK7|phospho|Y177|Q NA  
[Plakophilin 3|phospho|Y NA  
[G3BP-2|phospho|Y175| NA  
[B3GALT3|phospho|Y17 NA  
[MUCDHL|phospho|Y17 NA  
[tuberin|phospho|Y1736| NA  
[NDUFS7|phospho|Y162 NA  
NA NA  
NA NA  
[TOM1L2|phospho|Y160 NA  
[PAK5|phospho|Y159|Q NA  
[PSMA6|phospho|Y159|f NA  
[AurA|phospho|Y148|O1 NA  
[ANP32A|phospho|Y148 NA  
[HAND2|phospho|Y147|f NA  
[ANK1|phospho|Y1467|F NA  
NA NA  
[PAK5|phospho|Y146|Q NA  
[HAPIP|phospho|Y1372| NA  
[BEGAIN|phospho|Y137 NA  
[RPL13A|phospho|Y136| NA  
[PIPK I-gamma|phospho NA  
[HELZ|phospho|Y1353|F NA  
[HSPA2|phospho|Y135|F NA  
[CD84-H1|phospho|Y12 NA  
[ARHGEF2|phospho|Y12 NA  
[NMDAR2A|phospho|Y1 NA  
[E1B-AP5|phospho|Y12 NA  
[CNAP1|phospho|Y1228 NA  
[RGS14|phospho|Y122|C NA  
NA NA



|                        |           |
|------------------------|-----------|
| NA                     | PREDICTED |
| [Lrig2 phospho Y898 XP | PREDICTED |
| NA                     | NA        |
| NA                     | PREDICTED |
| [AKAP2 phospho Y911 C  | PREDICTED |
| NA                     | PREDICTED |
| [PTPRT phospho Y1030   | PREDICTED |
| NA                     | PREDICTED |
| [MINK phospho Y906 Q&  | PREDICTED |
| NA                     | NA        |
| NA                     | PREDICTED |
| [FLT3 phospho Y865 P3  | PREDICTED |
| NA                     | PREDICTED |



NA PREDICTED  
 NA PREDICTED  
 NA PREDICTED  
 NA PREDICTED  
 NA PREDICTED  
 NA PREDICTED  
 NA PREDICTED  
 NA NA  
 [DAPP1|phospho|Y139|C PREDICTED  
 [TrkB|phospho|Y515|Q6 PREDICTED  
 [p38-beta|phospho|Y190 PREDICTED  
 NA PREDICTED  
 [HER4|phospho|Y1188|C PREDICTED  
 [IRS-1|phospho|Y46|P35 PREDICTED  
 [PLCG1|phospho|Y1253 PREDICTED  
 NA PREDICTED  
 NA PREDICTED  
 [TrkA iso2|phospho|Y490 PREDICTED  
 [IGF1R|phospho|Y1165|I PREDICTED  
 [InsR|phospho|Y1000|P1 PREDICTED  
 [gelsolin|phospho|Y603|F PREDICTED  
 [ANXA2|phospho|Y23|P0 PREDICTED  
 [Ret|phospho|Y1062|P07 PREDICTED  
 [Met|phospho|Y1232|P10 PREDICTED  
 [SHP-2|phospho|Y542|Q PREDICTED  
 [Pyk2|phospho|Y402|Q1 PREDICTED  
 NA PREDICTED  
 NA PREDICTED  
 NA NA  
 NA PREDICTED  
 NA PREDICTED  
 [RCAS1|phospho|Y94|O NA  
 [TBCB|phospho|Y98|Q9 NA  
 [calmodulin|phospho|Y90 PREDICTED  
 [DDX3|phospho|Y103|O NA  
 [MAK3P|phospho|Y110|C NA  
 [VIM|phospho|Y116|P08 NA  
 [actin, beta|phospho|Y2 NA  
 [SYNPO|phospho|Y466|I NA  
 [Arp3|phospho|Y231|P61 NA  
 [LDH-A|phospho|Y238|P NA  
 [hnRNP F|phospho|Y246 NA  
 [HEP-COP|phospho|Y24 NA  
 [Dok1|phospho|Y401|P9 NA  
 [TRXR1|phospho|Y422|C NA  
 [EHD1|phospho|Y453|Q NA  
 [STXBP1|phospho|Y473 NA  
 [HSP90B|phospho|Y483 NA  
 [BUD13|phospho|Y494|C PREDICTED  
 NA NA  
 NA NA  
 [GA17|phospho|Y351|Q7 NA





NA PREDICTED  
[BTLA|phospho|Y282|Q7] PREDICTED  
NA PREDICTED  
[PLCG1|phospho|Y771|F] PREDICTED  
[Sgk269|phospho|Y880] NA  
[Lrig2|phospho|Y898|XP] PREDICTED  
[FLNA|phospho|Y1046|F] NA  
[SIPA1L3|phospho|Y126] NA  
NA NA  
[SLC27A2|phospho|Y60] NA  
NA NA  
NA NA  
NA NA  
NA NA  
NA NA  
NA NA  
[InsR|phospho|Y1000|P1] PREDICTED  
[CSFR|phospho|Y721|P] PREDICTED  
[Kit|phospho|Y703|P107] PREDICTED  
NA PREDICTED  
NA PREDICTED  
NA PREDICTED

NA PREDICTED  
NA PREDICTED  
NA PREDICTED  
NA PREDICTED  
NA PREDICTED  
NA PREDICTED  
[LRRFIP1|phospho|Y573|P1 NA PREDICTED  
NA PREDICTED  
NA PREDICTED  
NA PREDICTED  
NA PREDICTED  
NA PREDICTED  
NA PREDICTED  
NA PREDICTED  
NA PREDICTED  
NA PREDICTED  
NA PREDICTED  
NA PREDICTED  
NA PREDICTED  
NA PREDICTED  
NA PREDICTED  
[EpoR|phospho|Y504|P1 NA  
[Spry2|phospho|Y55|O4 NA  
[P130Cas|phospho|Y24 NA  
[Erbin|phospho|Y1104|Q NA  
[latrophilin 1|phospho|Y1 NA  
[CD5|phospho|Y452|P1 NA  
[HER4|phospho|Y1242|C NA  
[Met|phospho|Y1230|P0 NA  
[G6f|phospho|Y281|Q7Z NA  
[IkB-alpha|phospho|Y30 NA  
[3BP2|phospho|Y448|P7 NA  
[RBM3|phospho|Y151|P NA  
[ZAP70|phospho|Y492|P NA  
[PTP1B|phospho|Y66|P1 NA  
[RACK1|phospho|Y228|F NA  
[Syk|phospho|Y342|P48 NA  
[EGFR|phospho|Y1091|C PREDICTED  
[DKFZp564C182|phospho NA  
[Ret|phospho|Y864|P07 NA  
[Cbl|phospho|Y731|P22 NA  
[UBAP2|phospho|Y839|C NA  
[KIRREL|phospho|Y625| NA  
[ITSN2|phospho|Y967|Q NA  
[Siglec-10|phospho|Y59 NA  
[Gab1|phospho|Y285|Q1 NA  
[Akt1|phospho|Y315|P31 NA  
[Mpl|phospho|Y616|Q08 NA  
NA NA  
[PSD-93|phospho|Y348| NA  
[GCSFR|phospho|Y767| NA  
[MAP1B|phospho|Y1921 NA







|                         |           |
|-------------------------|-----------|
| NA                      | PREDICTED |
| NA                      | NA        |
| NA                      | PREDICTED |
| NA                      | NA        |
| NA                      | PREDICTED |
| [ 'Gab1 phospho Y373 Q1 | PREDICTED |
| [ 'FABP4 phospho Y19 P  | PREDICTED |
| NA                      | NA        |
| NA                      | PREDICTED |
| [ 'EphB1 phospho Y594 P | PREDICTED |
| NA                      | PREDICTED |
| [ 'EphA1 phospho Y781 P | PREDICTED |
| NA                      | PREDICTED |
| NA                      | PREDICTED |
| [ 'EphA7 phospho Y608 G | PREDICTED |
| [ 'VEGFR-2 phospho Y95  | PREDICTED |









|                         |           |
|-------------------------|-----------|
| NA                      | PREDICTED |
| NA                      | NA        |
| [CD84 phospho Y262 O    | NA        |
| [FRS2 phospho Y195 Q    | NA        |
| [IL-1RA phospho Y496 F  | NA        |
| [SNCA phospho Y133 P    | NA        |
| [SHIP-2 phospho Y671 C  | NA        |
| [CSFR phospho Y561 P    | NA        |
| [Pim1 phospho Y218 P    | NA        |
| [PIK3R1 phospho Y688 I  | NA        |
| [RIPK1 phospho Y384 Q   | NA        |
| [Abi phospho Y245 P     | NA        |
| [MIG-6 phospho Y394 Q   | NA        |
| [RACK1 phospho Y246 F   | NA        |
| [HER4 phospho Y1188 C   | PREDICTED |
| [FcRII-A phospho Y281 I | NA        |
| [CSF2RB phospho Y628    | NA        |
| [ephrin-B2 phospho Y33  | NA        |
| NA                      | NA        |
| [abLIM phospho Y439 O   | NA        |
| [DBNL phospho Y335 Q    | NA        |
| NA                      | NA        |
| [SLP76 phospho Y113 G   | NA        |
| [Abi-1 phospho Y332 Q   | NA        |
| [PIK3R1 phospho Y368 I  | NA        |
| [Syk phospho Y323 P     | NA        |
| NA                      | NA        |
| [FcRII-A phospho Y304 I | NA        |
| [CTNNB1 phospho Y716    | PREDICTED |
| NA                      | PREDICTED |
| [Blk phospho Y186 P     | NA        |
| [LMO7 phospho Y185 Q    | NA        |
| [PPAP2A phospho Y185    | NA        |
| [CASD1 phospho Y184 C   | NA        |
| [calponin 2 phospho Y18 | NA        |
| [DOCK1 phospho Y1811    | NA        |
| [actin, beta" phospho Y | NA        |
| [TOM1L2 phospho Y168    | NA        |
| [TAS2R40 phospho Y16    | NA        |
| [ATRX phospho Y1667 F   | NA        |
| [Nice-3 phospho Y166 Q  | NA        |

[P130Cas|phospho|Y165| NA  
[ITGB4|phospho|Y1564| NA  
[PKCD|phospho|Y155|P: NA  
[MEKK3|phospho|Y155| NA  
[MRLC2|phospho|Y154|f NA  
[Casp9|phospho|Y153|P: NA  
[ZNF183|phospho|Y153| NA  
[NEDD4|phospho|Y143|f NA  
NA NA  
[MYO7A|phospho|Y142| NA  
[SPTAN1|phospho|Y141 NA  
[MeCP2|phospho|Y141|f NA  
[tensin 1|phospho|Y1404 NA  
[ACP1|phospho|Y131|P2 NA  
[HYAL4|phospho|Y131|C NA  
[ZDHC7|phospho|Y130 NA  
[GRK2|phospho|Y13|P2: NA  
[USP34|phospho|Y1288| NA  
[DYX1C1|phospho|Y128 NA  
[LOC390998|phospho|Y: NA  
[A6|phospho|Y119|Q127 NA  
[HSPA9B|phospho|Y118 NA  
[PCM-1|phospho|Y1176| NA  
[KIAA0372|phospho|Y11 NA  
[Sec24B|phospho|Y117| NA  
[TrkC|phospho|Y800|Q1 NA  
NA NA  
NA NA  
NA NA  
NA NA  
NA NA  
[PTP1B|phospho|Y66|P1 NA  
[HePTP|phospho|Y149|f NA  
[PTPRB|phospho|Y1981 NA  
NA NA  
NA NA  
NA NA  
[FAK|phospho|Y925|Q0: PREDICTED  
NA NA  
[HS1|phospho|Y397|P14 PREDICTED  
[IRS-1|phospho|Y662|P3 PREDICTED  
NA NA  
[NAALADL2|phospho|Y1 NA  
[XDH|phospho|Y1091|P2 NA  
[GRF-1|phospho|Y1087| NA

[BCDO2|phospho|Y108| NA  
[HINT1|phospho|Y108|P NA  
[IL32|phospho|Y107|P24 NA  
NA NA  
[IFIH1|phospho|Y1000|G NA

| SH2_id | slide_id | sprot_id | sprot_name | sh2_range    | expression | Gene_name |        |
|--------|----------|----------|------------|--------------|------------|-----------|--------|
|        | 3        | 714-34   | O14492     | APS_HUMAN    | 417 – 515  | yes       | SH2B2  |
|        | 68       | none     | O14508     | SOCS2_HUMAN  | 48 – 156   | insoluble | SOCS2  |
|        | 39       | 811-24   | O14512     | SOCS7_HUMAN  | 400 – 509  | yes       | SOCS7  |
|        | 69       | none     | O14543     | SOCS3_HUMAN  | 46 – 142   | insoluble | SOCS3  |
|        | 70       | none     | O14544     | SOCS6_HUMAN  | 384 – 491  | insoluble | SOCS6  |
|        | 19       | 714-29   | O14796     | SH21B_HUMAN  | 5 – 101    | yes       | SH2D1B |
|        | 62       | 811-65   | O15357     | SHIP2_HUMAN  | 21 – 117   | yes       | INPPL1 |
|        | 67       | none     | O15524     | SOCS1_HUMAN  | 79 – 174   | insoluble | SOCS1  |
|        | 41       | 714-48   | O43639     | NCK2_HUMAN   | 285 – 380  | yes       | NCK2   |
|        | 55       | 714-31   | O60880     | SH21A_HUMAN  | 6 – 104    | yes       | SH2D1A |
|        | 71       | none     | O75159     | SOCS5_HUMAN  | 381 – 476  | insoluble | SOCS5  |
|        | 27       | 714-74   | O75791     | GRAP2_HUMAN  | 58 – 149   | yes       | GRAP2  |
|        | 43       | 811-35   | O75815     | BCAR3_HUMAN  | 154 – 253  | yes       | BCAR3  |
|        | 1        | 714-59   | P00519     | ABL1_HUMAN   | 127 – 217  | yes       | ABL1   |
|        | 73       | 811-30   | P00523     | SRC_CHICK    | 148 – 245  | yes       | SRC    |
|        | 36       | none     | P06239     | LCK_HUMAN    | 439 – 544  | degraded  | LCK    |
|        | 25       | 714-56   | P06241     | FYN_HUMAN    | 149 – 246  | yes       | FYN    |
|        | 21       | 811-55   | P07332     | FES_HUMAN    | 460 – 549  | yes       | FES    |
|        | 90       | 811-37   | P07947     | YES_HUMAN    | 158 – 255  | yes       | YES1   |
|        | 38       | 811-22   | P07948     | LYN_HUMAN    | 129 – 226  | yes       | LYN    |
|        | 32       | 714-53   | P08631     | HCK_HUMAN    | 144 – 241  | yes       | HCK    |
|        | 22       | 811-53   | P09769     | FGR_HUMAN    | 77 – 138   | yes       | FGR    |
|        | 47       | 816-39   | P10686     | PLCG1_RAT    | 550 – 657, | yes       | Plcg1  |
|        | 86       | 714-61   | P15498     | VAV_HUMAN    | 671 – 765  | yes       | VAV1   |
|        | 13       | none     | P15882     | CHIN_HUMAN   | 49 – 135   | insoluble | CHN1   |
|        | 40       | none     | P16333     | NCK1_HUMAN   | 282 – 376  | degraded  | NCK1   |
|        | 20       | 811-54   | P16591     | FER_HUMAN    | 460 – 550  | yes       | FER    |
|        | 48       | 811-29   | P16885     | PLCG2_HUMAN  | 532 – 635, | yes       | PLCG2  |
|        | 49       | 714-70   | P20936     | RASA1_HUMAN  | 181 – 272, | yes       | RASA1  |
|        | 10       | 816-10   | P22681     | CBL_HUMAN    | 267 – 341  | yes       | CBL    |
|        | 34       | none     | P23458     | JAK1_HUMAN   | 127 – 224  | degraded  | JAK1   |
|        | 45       | 811-18   | P27986     | P85A_HUMAN   | 333 – 428, | yes       | PIK3R1 |
|        | 63       | 811-20   | P29350     | PTN6_HUMAN   | 4 – 100,   | yes       | PTPN6  |
|        | 57       | 811-23   | P29353     | SHC1_HUMAN   | 488 – 579  | yes       | SHC1   |
|        | 85       | none     | P29597     | TYK2_HUMAN   | 450 – 529  | none      | TYK2   |
|        | 201      | 816-15   | P35235     | PTN11_MOUSE  | 6 – 102    | yes       | Ptpn11 |
|        | 202      | 816-16   | P35235     | PTN11_MOUSE  | 112 – 216  | yes       | Ptpn11 |
|        | 76       | none     | P40763     | STAT3_HUMAN  | 580 – 670  | insoluble | STAT3  |
|        | 17       | 714-51   | P41241     | CSK_MOUSE    | 82 – 171   | yes       | Csk    |
|        | 74       | none     | P42224     | STAT1_HUMAN  | 573 – 670  | insoluble | STAT1  |
|        | 77       | none     | P42229     | STAT5A_HUMAN | 589 – 686  | insoluble | STAT5A |
|        | 81       | none     | P42680     | TEC_HUMAN    | 247 – 345  | none      | TEC    |
|        | 93       | 811-42   | P42681     | TXK_HUMAN    | 150 – 246  | yes       | TXK    |
|        | 2        | 714-58   | P42684     | ABL2_HUMAN   | 173 – 263  | yes       | ABL2   |
|        | 23       | 714-27   | P42685     | FRK_HUMAN    | 116 – 208  | yes       | FRK    |
|        | 91       | 811-47   | P43403     | ZAP70_HUMAN  | 10 – 102,  | yes       | ZAP70  |
|        | 15       | 714-68   | P46108     | CRK_HUMAN    | 13 – 118   | yes       | CRK    |
|        | 16       | 714-66   | P46109     | CRKL_HUMAN   | 14 – 102   | yes       | CRKL   |
|        | 104      | 714- 38  | P48025     | KSYK_MOUSE   | 167 – 25   | yes       | Syk    |
|        | 102      | 714-36   | P48025     | KSYK_MOUSE   | 14 – 106   | yes       | Syk    |
|        | 5        | 714-49   | P51451     | BLK_HUMAN    | 124 – 220  | yes       | BLK    |

|     |        |        |              |             |           |        |
|-----|--------|--------|--------------|-------------|-----------|--------|
| 78  | none   | P51692 | STA5B_HUMAN  | 589 – 686   | insoluble | STAT5B |
| 100 | 811-63 | P51813 | BMX_HUMAN    | 296 – 392   | yes       | BMX    |
| 35  | none   | P52333 | JAK3_HUMAN   | 375 – 475   | degraded  | JAK3   |
| 75  | none   | P52630 | STAT2_HUMAN  | 572 – 667   | insoluble | STAT2  |
| 87  | 811-41 | P52735 | VAV2_HUMAN   | 673 – 767   | yes       | VAV2   |
| 30  | 811-51 | P62993 | GRB2_HUMAN   | 60 – 152    | yes       | GRB2   |
| 56  | 811-59 | P78314 | 3BP2_HUMAN   | 457 – 555   | yes       | SH3BP2 |
| 9   | 714-50 | Q06187 | BTK_HUMAN    | 281 – 377   | yes       | BTK    |
| 33  | 714-52 | Q08881 | ITK_HUMAN    | 239 – 338   | yes       | ITK    |
| 66  | 714-65 | Q13094 | LCP2_HUMAN   | 422 – 530   | yes       | LCP2   |
| 11  | 811-11 | Q13191 | CBLB_HUMAN   | 259 – 333   | yes       | CBLB   |
| 107 | 714-40 | Q13191 | CBLB_HUMAN   | 259 – 333   | yes       | CBLB   |
| 65  | none   | Q13239 | SLAP1_HUMAN  | 84 – 175    | insoluble | SLA    |
| 28  | 714-55 | Q13322 | GRB10_HUMAN  | 493 – 574   | yes       | GRB10  |
| 50  | none   | Q13671 | RIN1_HUMAN   | 69 – 163    | degraded  | RIN1   |
| 8   | 714-67 | Q13882 | PTK6_HUMAN   | 78 – 170    | yes       | PTK6   |
| 29  | 714-54 | Q14449 | GRB14_HUMAN  | 439 – 535   | yes       | GRB14  |
| 31  | none   | Q14451 | GRB7_HUMAN   | 431 – 527   | degraded  | GRB7   |
| 37  | 811-60 | Q16176 | Q16176_HUMAN | 79 - 161    | yes       | Isk    |
| 83  | 811-25 | Q63HR2 | TENC1_HUMAN  | 1140 – 124  | yes       | TENC1  |
| 82  | 811-48 | Q68CZ2 | TENS3_HUMAN  | 1172 – 128  | yes       | TNS3   |
| 59  | 714-64 | Q6S5L8 | SHC4_HUMAN   | 526 – 617   | yes       | SHC4   |
| 79  | 811-52 | Q7KZ85 | SPT6H_HUMAN  | 1325 – 143  | yes       | SUPT6H |
| 4   | none   | Q7M4L6 | SHF_HUMAN    | 380 – 475   | insoluble | SHF    |
| 96  | 714-41 | Q7Z7G1 | CLNK_HUMAN   | 309 – 419   | yes       | CLNK   |
| 99  | 811-38 | Q8IZW8 | TENS4_HUMAN  | 449 – 556   | yes       | TNS4   |
| 44  | 811-39 | Q8N5H7 | SH2D3_HUMAN  | 220 – 319   | yes       | SH2D3C |
| 52  | none   | Q8TB24 | RIN3_HUMAN   | 63 – 158    | degraded  | RIN3   |
| 6   | none   | Q8WV28 | BLNK_HUMAN   | 346 – 453   | insoluble | BLNK   |
| 72  | none   | Q8WXH5 | SOCS4_HUMAN  | 286 – 381   | insoluble | SOCS4  |
| 51  | none   | Q8WYP3 | RIN2_HUMAN   | 97 – 190    | degraded  | RIN2   |
| 58  | 811-69 | Q92529 | SHC3_HUMAN   | 499 – 590   | yes       | SHC3   |
| 46  | 811-19 | Q92569 | P55G_HUMAN   | 65 – 160, 3 | yes       | PIK3R3 |
| 61  | 811-66 | Q92835 | SHIP1_HUMAN  | 5 – 101     | yes       | INPP5D |
| 60  | 714-60 | Q96IW2 | SHD_HUMAN    | 240 – 335   | yes       | SHD    |
| 94  | 811-46 | Q96JZ2 | HSH2D_HUMAN  | 34 – 125    | yes       | HSH2D  |
| 42  | 811-34 | Q9BRG2 | SH23A_HUMAN  | 15 – 114    | yes       | SH2D3A |
| 95  | 811-62 | Q9H3Y6 | SRMS_HUMAN   | 120 – 212   | yes       | SRMS   |
| 53  | none   | Q9H788 | SH24A_HUMAN  | 347 – 440   | insoluble | SH2D4A |
| 84  | 714-62 | Q9HBL0 | TENS1_HUMAN  | 1463 – 157  | yes       | TNS1   |
| 89  | 811-44 | Q9NP31 | SH22A_HUMAN  | 95 – 186    | yes       | SH2D2A |
| 54  | 714-73 | Q9NRF2 | SH2B1_HUMAN  | 527 – 625   | yes       | SH2B1  |
| 14  | none   | Q9NSE2 | CISH_HUMAN   | 82 – 163    | insoluble | CISH   |
| 101 | 714-35 | Q9UGK3 | STAP2_HUMAN  | 133 – 248   | yes       | STAP2  |
| 88  | none   | Q9UKW4 | VAV3_HUMAN   | 672 – 766   | insoluble | VAV3   |
| 12  | none   | Q9ULV8 | CBLC_HUMAN   | 235 - 332   | insoluble | CBLC   |
| 7   | 714-75 | Q9ULZ2 | STAP1_HUMAN  | 177 – 280   | yes       | STAP1  |
| 18  | 714-28 | Q9UN19 | DAPP1_HUMAN  | 35 – 129    | yes       | DAPP1  |

Correlations between the results of probing three different replica array on a single glass chip.

| a-b      | a-c      | b-c      | SH2          |
|----------|----------|----------|--------------|
| 0.99194  | 0.979747 | 0.980817 | ITK          |
| 0.9915   | 0.970316 | 0.969368 | YES          |
| 0.991378 | 0.990506 | 0.993484 | PTPN11 (1)   |
| 0.988643 | 0.987636 | 0.989362 | SH2D3C       |
| 0.988095 | 0.978131 | 0.983175 | LYN          |
| 0.986866 | 0.967952 | 0.980126 | SRMS         |
| 0.986808 | 0.951581 | 0.960863 | VAV2         |
| 0.985855 | 0.979009 | 0.976557 | SRC          |
| 0.985789 | 0.976538 | 0.984389 | ABL2         |
| 0.985691 | 0.985899 | 0.987661 | PTPN11 (1-2) |
| 0.984729 | 0.977608 | 0.983574 | TXK          |
| 0.984556 | 0.98332  | 0.989567 | SYK (2)      |
| 0.984311 | 0.987109 | 0.984505 | VAV2         |
| 0.984176 | 0.978171 | 0.980091 | TNS4         |
| 0.983623 | 0.970853 | 0.985646 | SHC1         |
| 0.983149 | 0.971702 | 0.989767 | MATK         |
| 0.982249 | 0.900358 | 0.910242 | PIK3R1 (1-2) |
| 0.98073  | 0.976571 | 0.968514 | NCK2         |
| 0.980589 | 0.970094 | 0.968852 | FYN          |
| 0.978566 | 0.973105 | 0.988984 | PLCG1        |
| 0.977663 | 0.951676 | 0.951555 | PIK3R3 (1-2) |
| 0.975798 | 0.954761 | 0.958432 | SYK (1)      |
| 0.974336 | 0.973988 | 0.989016 | SHC1         |
| 0.973581 | 0.962673 | 0.962834 | HCK          |
| 0.972913 | 0.972464 | 0.986435 | SH2D1B       |
| 0.971682 | 0.6948   | 0.708777 | PTPN6        |
| 0.970835 | 0.942722 | 0.952076 | GRB14        |
| 0.970696 | 0.953177 | 0.980344 | SUPT6H       |
| 0.97029  | 0.950847 | 0.976134 | CBLB         |
| 0.969105 | 0.875674 | 0.907289 | SOCS5        |
| 0.967759 | 0.981703 | 0.969613 | SHIP1        |
| 0.965321 | 0.962414 | 0.968183 | SH2D2A       |
| 0.965171 | 0.913722 | 0.913329 | PTPN11 (2)   |
| 0.964933 | 0.947802 | 0.975969 | APS          |
| 0.964795 | 0.941817 | 0.982894 | FGR          |
| 0.963368 | 0.963922 | 0.967851 | ABL1         |
| 0.961872 | 0.859325 | 0.922882 | CRK          |
| 0.956653 | 0.921144 | 0.948954 | BTK          |
| 0.954952 | 0.927293 | 0.97885  | BKS          |
| 0.953751 | 0.917518 | 0.919393 | CRKL         |
| 0.952318 | 0.970063 | 0.972416 | TNS1         |
| 0.949748 | 0.931126 | 0.941072 | GADS         |
| 0.948802 | 0.924193 | 0.972202 | TNS3         |
| 0.947647 | 0.904806 | 0.957132 | GRB2         |
| 0.941619 | 0.908747 | 0.955065 | SHIP2        |
| 0.939934 | 0.922709 | 0.970346 | BLK          |

For four domains the profiling experiment was repeated twice. Below are reported Pearson correlation coefficients among two experiments.

| DOMAIN | PCC  |
|--------|------|
| FYN    | 0.95 |
| GADS   | 0.96 |
| NCK2   | 0.95 |
| SHC1   | 0.9  |
| VAV2   | 0.98 |

|          |          |          |             |
|----------|----------|----------|-------------|
| 0.937779 | 0.93338  | 0.970997 | FES         |
| 0.933764 | 0.880788 | 0.902211 | NCK2        |
| 0.932958 | 0.740925 | 0.774856 | SHC3        |
| 0.931854 | 0.793439 | 0.813826 | BRK         |
| 0.930263 | 0.890118 | 0.940094 | BMX         |
| 0.928161 | 0.881169 | 0.92699  | FER         |
| 0.924988 | 0.90033  | 0.904372 | SHD         |
| 0.920134 | 0.93048  | 0.969113 | SOCS7       |
| 0.919566 | 0.921647 | 0.892553 | FRK         |
| 0.915614 | 0.96226  | 0.914874 | HSH2D       |
| 0.913085 | 0.889983 | 0.976309 | CSK         |
| 0.908422 | 0.928755 | 0.88452  | PLCG2       |
| 0.907833 | 0.913724 | 0.959472 | FYN         |
| 0.900977 | 0.871108 | 0.862867 | CBL         |
| 0.900796 | 0.945205 | 0.925392 | TENC1       |
| 0.900571 | 0.889163 | 0.87943  | SH2D1A      |
| 0.897288 | 0.880378 | 0.984053 | SH2D3A      |
| 0.89603  | 0.832932 | 0.886903 | BCAR3       |
| 0.879208 | 0.765469 | 0.860921 | VAV1        |
| 0.877635 | 0.89453  | 0.816364 | SH3BP2      |
| 0.876256 | 0.922348 | 0.892637 | BRDG1       |
| 0.871556 | 0.839902 | 0.878097 | SLP76       |
| 0.869127 | 0.862699 | 0.888412 | RASA1 (1-2) |
| 0.859044 | 0.899826 | 0.940927 | GADS        |
| 0.836069 | 0.866174 | 0.948066 | SH2B        |
| 0.820522 | 0.799402 | 0.822885 | ZAP70 (1-2) |
| 0.800041 | 0.765792 | 0.861451 | SHC4        |
| 0.788028 | 0.807225 | 0.882372 | MIST        |
| 0.62765  | 0.447228 | 0.379438 | DAPP1       |
| 0.284759 | 0.827822 | 0.281346 | GRB10       |



ment  
ted the  
ng the

## Supplemental Figures and Text

| PMID     | sprot_SH2 | name_SH2    | sprot_bi | name_binder | method      | Y_site |
|----------|-----------|-------------|----------|-------------|-------------|--------|
| 8226808  | P27986    | P85A_HUMAN  | P04629   | NTRK1_HUMAN | coimmunopr  | Y757   |
| 8226808  | P27986    | P85A_HUMAN  | P04629   | NTRK1_HUMAN | competitio  | Y757   |
| 11323411 | Q06124    | PTN11_HUMAN | Q13480   | GAB1_HUMAN  | coimmunopr  | Y659   |
| 12855672 | Q06124    | PTN11_HUMAN | Q13480   | GAB1_HUMAN  | coimmunopr  | Y659   |
| 14679216 | P24604    | TEC_MOUSE   | Q61152   | PTN18_MOUSE | pull down   | Y381   |
| 17050525 | P27986    | P85A_HUMAN  | P15498   | VAV_HUMAN   | pull down   | Y174   |
| 17050525 | Q62077    | PLCG1_HUMAN | P15498   | VAV_HUMAN   | pull down   | Y174   |
| 17050525 | P06239    | LCK_HUMAN   | P15498   | VAV_HUMAN   | pull down   | Y174   |
| 8577729  | P29350    | PTN6_HUMAN  | P31994   | FCG2B_HUMAN | proteinchi  | Y292   |
| 9603468  | P29350    | PTN6_HUMAN  | P31994   | FCG2B_HUMAN | pull down   | Y292   |
| 9973396  | Q9ES52    | SHIP1_MOUSE | P08101   | FCGR2_MOUSE | pull down   | Y309   |
| 10382761 | P07948    | LYN_HUMAN   | P31994   | FCG2B_HUMAN | pull down   | Y292   |
| 10382761 | P29353    | SHC1_HUMAN  | P31994   | FCG2B_HUMAN | pull down   | Y292   |
| 10382761 | Q06124    | PTN11_HUMAN | P31994   | FCG2B_HUMAN | pull down   | Y292   |
| 10382761 | O00145    | SHIP1_HUMAN | P31994   | FCG2B_HUMAN | pull down   | Y292   |
| 10976913 | Q06124    | PTN11_HUMAN | P16310   | GHR_RAT     | pull down   | Y594   |
| 11337495 | P27986    | P85A_HUMAN  | P27986   | P85A_HUMAN  | coimmunopr  | Y688   |
| 11940572 | P40763    | STAT3_HUMAN | P04626   | ERBB2_HUMAN | coimmunopr  | Y1222  |
| 8798570  | Q60631    | GRB2_MOUSE  | P54762   | EPHB1_HUMAN | two hybrid  | Y928   |
| 8798570  | Q60760    | GRB10_MOUSE | P54762   | EPHB1_HUMAN | two hybrid  | Y928   |
| 12223469 | Q14451    | GRB7_HUMAN  | P54762   | EPHB1_HUMAN | two hybrid  | Y928   |
| 12223469 | Q14451    | GRB7_HUMAN  | P54762   | EPHB1_HUMAN | pull down   | Y928   |
| 9837784  | P46109    | CRKL_HUMAN  | P42229   | STA5A_HUMAN | pull down   | Y694   |
| 9837784  | P46109    | CRKL_HUMAN  | P42229   | STA5A_HUMAN | far western | Y694   |
| 11494128 | Q4JIM5    | ABL2_MOUSE  | P54754   | EPHB3_MOUSE | pull down   | Y603   |
| 11494128 | Q4JIM5    | ABL2_MOUSE  | P54754   | EPHB3_MOUSE | lex-a dime  | Y603   |
| 8156998  | P42224    | STAT1_HUMAN | P15260   | INGR1_HUMAN | coimmunopr  | Y457   |
| 8156998  | P42224    | STAT1_HUMAN | P15260   | INGR1_HUMAN | competitio  | Y457   |
| 8662591  | P42227    | STAT3_MOUSE | P15260   | INGR1_HUMAN | electropho  | Y457   |
| 8662591  | P42227    | STAT3_MOUSE | P15260   | INGR1_HUMAN | competitio  | Y457   |
| 8662591  | P42224    | STAT1_HUMAN | P15260   | INGR1_HUMAN | electropho  | Y457   |
| 8662591  | P42224    | STAT1_HUMAN | P15260   | INGR1_HUMAN | competitio  | Y457   |
| 8662795  | P42224    | STAT1_HUMAN | P15260   | INGR1_HUMAN | inferred b  | Y457   |
| 15780933 | P42224    | STAT1_HUMAN | P15260   | INGR1_HUMAN | x-ray crys  | Y457   |
| 10748052 | P62994    | GRB2_RAT    | P35739   | NTRK1_RAT   | pull down   | Y794   |
| 10748052 | P62994    | GRB2_RAT    | P35739   | NTRK1_RAT   | two hybrid  | Y794   |
| 10748052 | P62994    | GRB2_RAT    | P35739   | NTRK1_RAT   | coimmunopr  | Y794   |
| 8384556  | P19174    | PLCG1_HUMAN | P04629   | NTRK1_HUMAN | coimmunopr  | Y791   |
| 8384556  | P19174    | PLCG1_HUMAN | P04629   | NTRK1_HUMAN | competitio  | Y791   |
| 9890995  | P29351    | PTN6_MOUSE  | P35329   | CD22_MOUSE  | coimmunopr  | Y857   |
| 11551923 | P29351    | PTN6_MOUSE  | P35329   | CD22_MOUSE  | coimmunopr  | Y857   |
| 12070153 | P42224    | STAT1_HUMAN | P00533   | EGFR_HUMAN  | electropho  | Y978   |
| 12070153 | P42224    | STAT1_HUMAN | P00533   | EGFR_HUMAN  | competitio  | Y978   |
| 11432792 | Q06124    | PTN11_HUMAN | O43559   | FRS3_HUMAN  | two hybrid  | Y455   |
| 12928397 | O14796    | SH21B_HUMAN | Q9UIB8   | SLAF5_HUMAN | coimmunopr  | Y279   |
| 12928397 | O60880    | SH21A_HUMAN | Q9UIB8   | SLAF5_HUMAN | coimmunopr  | Y279   |
| 9428692  | P51692    | STA5B_HUMAN | P06213   | INSR_HUMAN  | two hybrid  | Y999   |
| 7642582  | P20936    | RASA1_HUMAN | P08069   | IGF1R_HUMAN | pull down   | Y980   |
| 9480911  | Q64010    | CRK_MOUSE   | P08069   | IGF1R_HUMAN | coimmunopr  | Y980   |
| 9480911  | Q64010    | CRK_MOUSE   | P08069   | IGF1R_HUMAN | pull down   | Y980   |
| 12023952 | P12931    | SRC_HUMAN   | P35918   | VGFR2_MOUSE | pull down   | Y1212  |
| 16966330 | P16333    | NCK1_HUMAN  | P35968   | VGFR2_HUMAN | anti bait   | Y1214  |

|          |        |             |        |             |             |       |
|----------|--------|-------------|--------|-------------|-------------|-------|
| 11786908 | P29350 | PTN6_HUMAN  | P19438 | TNR1A_HUMAN | pull down   | Y401  |
| 11786908 | Q06124 | PTN11_HUMAN | P19438 | TNR1A_HUMAN | pull down   | Y401  |
| 11786908 | O00145 | SHIP1_HUMAN | P19438 | TNR1A_HUMAN | pull down   | Y401  |
| 15128762 | P41499 | PTN11_RAT   | Q8K558 | TRML1_MOUSE | coimmunopr  | Y286  |
| 9079677  | Q14451 | GRB7_HUMAN  | P04626 | ERBB2_HUMAN | competitio  | Y1139 |
| 11940572 | P12931 | SRC_HUMAN   | P04626 | ERBB2_HUMAN | coimmunopr  | Y1139 |
| 11940572 | P40763 | STAT3_HUMAN | P04626 | ERBB2_HUMAN | coimmunopr  | Y1139 |
| 12061724 | Q14451 | GRB7_HUMAN  | P04626 | ERBB2_HUMAN | nuclear ma  | Y1139 |
| 12975581 | Q14451 | GRB7_HUMAN  | P04626 | ERBB2_HUMAN | x-ray crys  | Y1139 |
| 14665640 | P29353 | SHC1_HUMAN  | Q02763 | TIE2_HUMAN  | coimmunopr  | Y1080 |
| 14665640 | P29353 | SHC1_HUMAN  | Q02763 | TIE2_HUMAN  | pull down   | Y1080 |
| 7529874  | P62994 | GRB2_RAT    | P11274 | BCR_HUMAN   | coimmunopr  | Y177  |
| 8112292  | P62993 | GRB2_HUMAN  | P11274 | BCR_HUMAN   | coimmunopr  | Y177  |
| 8112292  | P62993 | GRB2_HUMAN  | P11274 | BCR_HUMAN   | pull down   | Y177  |
| 8955135  | P62993 | GRB2_HUMAN  | P11274 | BCR_HUMAN   | pull down   | Y177  |
| 8995379  | P62993 | GRB2_HUMAN  | P11274 | BCR_HUMAN   | pull down   | Y177  |
| 8995379  | Q13588 | GRAP_HUMAN  | P11274 | BCR_HUMAN   | pull down   | Y177  |
| 9174058  | P62993 | GRB2_HUMAN  | P11274 | BCR_HUMAN   | pull down   | Y177  |
| 9178913  | P62993 | GRB2_HUMAN  | P11274 | BCR_HUMAN   | pull down   | Y177  |
| 10887132 | P62993 | GRB2_HUMAN  | P11274 | BCR_HUMAN   | coimmunopr  | Y177  |
| 11726515 | P62993 | GRB2_HUMAN  | P11274 | BCR_HUMAN   | anti bait   | Y177  |
| 11726515 | P62993 | GRB2_HUMAN  | P11274 | BCR_HUMAN   | coimmunopr  | Y177  |
| 15861137 | P41241 | CSK_MOUSE   | P55284 | CADH5_MOUSE | pull down   | Y685  |
| 15861137 | P41241 | CSK_MOUSE   | P55284 | CADH5_MOUSE | anti bait   | Y685  |
| 16909109 | P12931 | SRC_HUMAN   | P33151 | CADH5_HUMAN | pull down   | Y685  |
| 9278444  | P05480 | SRC_MOUSE   | P08050 | CXA1_RAT    | pull down   | Y264  |
| 11035005 | P12931 | SRC_CHICK   | P17302 | CXA1_HUMAN  | pull down   | Y265  |
| 9178760  | P62993 | GRB2_HUMAN  | P30530 | UFO_HUMAN   | far western | Y779  |
| 7487883  | P43405 | KSYK_HUMAN  | P12318 | FCG2A_HUMAN | pull down   | Y304  |
| 11390470 | P15498 | VAV_HUMAN   | P78314 | 3BP2_HUMAN  | pull down   | Y183  |
| 11390470 | P16885 | PLCG2_HUMAN | P78314 | 3BP2_HUMAN  | pull down   | Y183  |
| 11390470 | P19174 | PLCG1_HUMAN | P78314 | 3BP2_HUMAN  | pull down   | Y183  |
| 11390470 | P52735 | VAV2_HUMAN  | P78314 | 3BP2_HUMAN  | pull down   | Y183  |
| 12709437 | P07948 | LYN_HUMAN   | Q06649 | 3BP2_MOUSE  | pull down   | Y446  |
| 15751964 | P06239 | LCK_HUMAN   | P78314 | 3BP2_HUMAN  | pull down   | Y448  |
| 9183008  | Q63206 | Q63206_RAT  | P14317 | HCLS1_HUMAN | enzymatic   | Y397  |
| 15795233 | P07948 | LYN_HUMAN   | P14317 | HCLS1_HUMAN | pull down   | Y397  |
| 10837138 | Q15464 | SHB_HUMAN   | P26618 | PGFRA_MOUSE | pull down   | Y720  |
| 10837138 | Q6PD21 | SHB_MOUSE   | P26618 | PGFRA_MOUSE | coimmunopr  | Y720  |
| 9182757  | Q60631 | GRB2_MOUSE  | Q8C180 | FRS2_MOUSE  | pull down   | Y196  |
| 7685273  | P07947 | YES_HUMAN   | P09619 | PGFRB_HUMAN | pull down   | Y581  |
| 7685273  | P12931 | SRC_HUMAN   | P09619 | PGFRB_HUMAN | pull down   | Y581  |
| 9742401  | Q13239 | SLAP1_HUMAN | P09619 | PGFRB_HUMAN | pull down   | Y581  |
| 9742401  | Q13239 | SLAP1_HUMAN | P09619 | PGFRB_HUMAN | coimmunopr  | Y581  |
| 12706723 | P25020 | SRC_RSVH1   | P09619 | PGFRB_HUMAN | isothermal  | Y581  |
| 12706723 | P25020 | SRC_RSVH1   | P09619 | PGFRB_HUMAN | x-ray crys  | Y581  |
| 1314164  | P20936 | RASA1_HUMAN | P09619 | PGFRB_HUMAN | coimmunopr  | Y771  |
| 1375321  | P20936 | RASA1_HUMAN | P09619 | PGFRB_HUMAN | coimmunopr  | Y771  |
| 8382774  | P20936 | RASA1_HUMAN | P09619 | PGFRB_HUMAN | coimmunopr  | Y771  |
| 10454568 | Q13322 | GRB10_HUMAN | P09619 | PGFRB_HUMAN | pull down   | Y771  |
| 10733900 | P46108 | CRK_HUMAN   | P09619 | PGFRB_HUMAN | pull down   | Y771  |
| 9546424  | P46108 | CRK_HUMAN   | P16234 | PGFRA_HUMAN | coimmunopr  | Y762  |
| 9546424  | P46108 | CRK_HUMAN   | P16234 | PGFRA_HUMAN | enzymatic   | Y762  |

|          |           |             |        |             |             |       |
|----------|-----------|-------------|--------|-------------|-------------|-------|
| 9546424  | P46109    | CRKL_HUMAN  | P16234 | PGFRA_HUMAN | coimmunopr  | Y762  |
| 9546424  | P46109    | CRKL_HUMAN  | P16234 | PGFRA_HUMAN | enzymatic   | Y762  |
| 10733900 | P46108    | CRK_HUMAN   | P16234 | PGFRA_HUMAN | pull down   | Y762  |
| 9506989  | Q13322    | GRB10_HUMAN | P06213 | INSR_HUMAN  | protein tr  | Y1189 |
| 9742218  | Q9NRF1    | SH2B1_HUMAN | P06213 | INSR_HUMAN  | coimmunopr  | Y1189 |
| 9742218  | Q9NRF1    | SH2B1_HUMAN | P06213 | INSR_HUMAN  | two hybrid  | Y1189 |
| 7528772  | P43403    | ZAP70_HUMAN | P20963 | CD3Z_HUMAN  | pull down   | Y123  |
| 10752619 | P43403    | ZAP70_HUMAN | P20963 | CD3Z_HUMAN  | isothermal  | Y123  |
| 14993273 | O00145    | SHIP1_HUMAN | Q9QZK7 | DOK3_MOUSE  | pull down   | Y325  |
| 14993273 | P41240    | CSK_HUMAN   | Q9QZK7 | DOK3_MOUSE  | pull down   | Y325  |
| 10570256 | Q13094    | LCP2_HUMAN  | O15117 | FYB_HUMAN   | coimmunopr  | Y651  |
| 15477347 | Q60787    | LCP2_MOUSE  | O35601 | FYB_MOUSE   | pull down   | Y687  |
| 15647376 | P00523    | SRC_CHICK   | P15311 | EZRI_HUMAN  | pull down   | Y191  |
| 15752563 | Q9NP31    | SH22A_HUMAN | P55072 | TERA_HUMAN  | pull down   | Y805  |
| 9774102  | O60880    | SH21A_HUMAN | Q13291 | SLAF1_HUMAN | two hybrid  | Y307  |
| 11477403 | P39688    | FYN_MOUSE   | Q9QUM4 | SLAF1_MOUSE | pull down   | Y315  |
| 11477403 | Q9ES52    | SHIP1_MOUSE | Q9QUM4 | SLAF1_MOUSE | pull down   | Y315  |
| 9655255  | P00523    | SRC_CHICK   | Q90738 | AFAP1_CHICK | coimmunopr  | Y451  |
| 15474475 | P41240    | CSK_HUMAN   | Q8NHL6 | LIRB1_HUMAN | coimmunopr  | Y562  |
| 15474475 | P41240    | CSK_HUMAN   | Q8NHL6 | LIRB1_HUMAN | protein tr  | Y562  |
| 8574854  | P29350    | PTN6_HUMAN  | P43628 | KI2L3_HUMAN | pull down   | Y303  |
| 8648092  | P29350    | PTN6_HUMAN  | P43628 | KI2L3_HUMAN | pull down   | Y303  |
| 8648092  | P29350    | PTN6_HUMAN  | P43628 | KI2L3_HUMAN | surface pl  | Y303  |
| 8648092  | Q06124    | PTN11_HUMAN | P43628 | KI2L3_HUMAN | pull down   | Y303  |
| 8648092  | Q06124    | PTN11_HUMAN | P43628 | KI2L3_HUMAN | surface pl  | Y303  |
| 8691154  | P29350    | PTN6_HUMAN  | P43628 | KI2L3_HUMAN | coimmunopr  | Y303  |
| 8691154  | P29350    | PTN6_HUMAN  | P43628 | KI2L3_HUMAN | pull down   | Y303  |
| 9148918  | P29351    | PTN6_MOUSE  | P43628 | KI2L3_HUMAN | affinity cl | Y303  |
| 8691146  | P29350    | PTN6_HUMAN  | P43626 | KI2L1_HUMAN | coimmunopr  | Y302  |
| 8691146  | P29350    | PTN6_HUMAN  | P43626 | KI2L1_HUMAN | pull down   | Y302  |
| 9751747  | P27986    | P85A_HUMAN  | P43626 | KI2L1_HUMAN | two hybrid  | Y302  |
| 9751747  | P27986    | P85A_HUMAN  | P43626 | KI2L1_HUMAN | lex-a dime  | Y302  |
| 9751747  | Q06124    | PTN11_HUMAN | P43626 | KI2L1_HUMAN | two hybrid  | Y302  |
| 9751747  | Q06124    | PTN11_HUMAN | P43626 | KI2L1_HUMAN | lex-a dime  | Y302  |
| 18258597 | P62993    | GRB2_HUMAN  | Q6X936 | KIRR1_RAT   | coimmunopr  | Y637  |
| 9380408  | P62993    | GRB2_HUMAN  | P09581 | CSF1R_MOUSE | two hybrid  | Y921  |
| 11075810 | Q03160    | GRB7_MOUSE  | Q03135 | CAV1_HUMAN  | pull down   | Y14   |
| 11075810 | Q03160    | GRB7_MOUSE  | Q03135 | CAV1_HUMAN  | coimmunopr  | Y14   |
| 11075810 | Q03160    | GRB7_MOUSE  | Q03135 | CAV1_HUMAN  | competitio  | Y14   |
| 11805080 | P41241    | CSK_MOUSE   | P49817 | CAV1_MOUSE  | pull down   | Y14   |
| 11805080 | P41241    | CSK_MOUSE   | P49817 | CAV1_MOUSE  | coimmunopr  | Y14   |
| 16678999 | P41240    | CSK_HUMAN   | Q03135 | CAV1_HUMAN  | coimmunopr  | Y14   |
| 1396585  | P19174    | PLCG1_HUMAN | P09619 | PGFRB_HUMAN | coimmunopr  | Y1009 |
| 7530043  | Q06124    | PTN11_HUMAN | P09619 | PGFRB_HUMAN | surface pl  | Y1009 |
| 7678051  | XP_542998 | PLCG1_DOG   | P09619 | PGFRB_HUMAN | coimmunopr  | Y1009 |
| 7688466  | Q06124    | PTN11_HUMAN | P09619 | PGFRB_HUMAN | unspecifie  | Y1009 |
| 7691811  | XP_534686 | PTN11       | P09619 | PGFRB_HUMAN | coimmunopr  | Y1009 |
| 8041791  | Q06124    | PTN11_HUMAN | P05622 | PGFRB_MOUSE | coimmunopr  | Y1008 |
| 8183548  | Q06124    | PTN11_HUMAN | P09619 | PGFRB_HUMAN | experiment  | Y1009 |
| 8538796  | Q06124    | PTN11_HUMAN | P09619 | PGFRB_HUMAN | x-ray crys  | Y1009 |
| 11027258 | O43639    | NCK2_HUMAN  | P09619 | PGFRB_HUMAN | unspecifie  | Y1009 |
| 12606549 | O43639    | NCK2_HUMAN  | P52799 | EFNB2_HUMAN | circular d  | Y316  |
| 12606549 | O43639    | NCK2_HUMAN  | P52799 | EFNB2_HUMAN | nuclear ma  | Y316  |

|          |        |             |        |             |              |       |
|----------|--------|-------------|--------|-------------|--------------|-------|
| 15764601 | O43639 | NCK2_HUMAN  | P52799 | EFNB2_HUMAN | nuclear maç  | Y316  |
| 10811803 | P19174 | PLCG1_HUMAN | O43561 | LAT_HUMAN   | coimmunoprç  | Y161  |
| 10811803 | P19174 | PLCG1_HUMAN | O43561 | LAT_HUMAN   | pull down    | Y161  |
| 9655255  | P00523 | SRC_CHICK   | Q90738 | AFAP1_CHICK | coimmunoprç  | Y453  |
| 12387735 | P43405 | KSYK_HUMAN  | P26038 | MOES_HUMAN  | pull down    | Y191  |
| 10570256 | Q13094 | LCP2_HUMAN  | O15117 | FYB_HUMAN   | coimmunoprç  | Y595  |
| 15477347 | Q60787 | LCP2_MOUSE  | O35601 | FYB_MOUSE   | pull down    | Y584  |
| 11316748 | P46108 | CRK_HUMAN   | O14654 | IRS4_HUMAN  | pull down    | Y700  |
| 11316748 | P46108 | CRK_HUMAN   | O14654 | IRS4_HUMAN  | coimmunoprç  | Y700  |
| 15751964 | P15498 | VAV_HUMAN   | Q06649 | 3BP2_MOUSE  | coimmunoprç  | Y183  |
| 9516479  | Q14451 | GRB7_HUMAN  | P21860 | ERBB3_HUMAN | competitioç  | Y1199 |
| 9890995  | P29351 | PTN6_MOUSE  | P35329 | CD22_MOUSE  | coimmunoprç  | Y837  |
| 8622870  | Q14451 | GRB7_HUMAN  | P35235 | PTN11_MOUSE | two hybrid   | Y584  |
| 8959326  | P62993 | GRB2_HUMAN  | P35235 | PTN11_MOUSE | coimmunoprç  | Y584  |
| 11432792 | P62993 | GRB2_HUMAN  | P35235 | PTN11_MOUSE | two hybrid   | Y584  |
| 12531430 | P62994 | GRB2_RAT    | P35235 | PTN11_MOUSE | coimmunoprç  | Y584  |
| 15751964 | P06239 | LCK_HUMAN   | Q06649 | 3BP2_MOUSE  | pull down    | Y446  |
| 15751964 | P15498 | VAV_HUMAN   | Q06649 | 3BP2_MOUSE  | coimmunoprç  | Y446  |
| 7687763  | P07332 | FES_HUMAN   | Q6GTU5 | FES_HUMAN   | pull down    | Y713  |
| 7684160  | P27986 | P85A_HUMAN  | P15391 | CD19_HUMAN  | coimmunoprç  | Y531  |
| 10022120 | P46109 | CRKL_HUMAN  | Q13191 | CBLB_HUMAN  | coimmunoprç  | Y709  |
| 17050525 | P27986 | P85A_HUMAN  | P15498 | VAV_HUMAN   | pull down    | Y160  |
| 17050525 | Q62077 | PLCG1_HUMAN | P15498 | VAV_HUMAN   | pull down    | Y160  |
| 17050525 | P06239 | LCK_HUMAN   | P15498 | VAV_HUMAN   | pull down    | Y160  |
| 1382595  | P26450 | P85A_MOUSE  | P03076 | MT_POVM3    | coimmunoprç  | Y315  |
| 8065326  | Q63787 | P85A_RAT    | P03076 | MT_POVM3    | competitioç  | Y315  |
| 11123912 | P27986 | P85A_HUMAN  | P03076 | MT_POVM3    | nuclear maç  | Y315  |
| 7680435  | P06239 | LCK_HUMAN   | P03079 | MT_POVHA    | nuclear maç  | Y324  |
| 10790433 | P41240 | CSK_HUMAN   | Q9NWQ8 | PAG1_HUMAN  | pull down    | Y317  |
| 10978177 | P27986 | P85A_HUMAN  | Q13480 | GAB1_HUMAN  | pull down    | Y447  |
| 10978177 | P27986 | P85A_HUMAN  | Q13480 | GAB1_HUMAN  | coimmunoprç  | Y447  |
| 9182757  | Q60631 | GRB2_MOUSE  | Q8C180 | FRS2_MOUSE  | pull down    | Y392  |
| 9182757  | Q60631 | GRB2_MOUSE  | Q8C180 | FRS2_MOUSE  | pull down    | Y349  |
| 8662591  | P42227 | STAT3_MOUSE | P40189 | IL6RB_HUMAN | electrophoç  | Y905  |
| 8662591  | P42227 | STAT3_MOUSE | P40189 | IL6RB_HUMAN | competitioç  | Y905  |
| 8662591  | P42224 | STAT1_HUMAN | P40189 | IL6RB_HUMAN | electrophoç  | Y905  |
| 8662591  | P42224 | STAT1_HUMAN | P40189 | IL6RB_HUMAN | competitioç  | Y905  |
| 15953601 | Q62077 | PLCG1_HUMAN | P14753 | EPOR_MOUSE  | phage dispç  | Y367  |
| 9632781  | Q06124 | PTN11_HUMAN | Q8WU20 | FRS2_HUMAN  | far westernç | Y436  |
| 9632781  | Q06124 | PTN11_HUMAN | Q8WU20 | FRS2_HUMAN  | coimmunoprç  | Y436  |
| 9528781  | P29350 | PTN6_HUMAN  | P05532 | KIT_MOUSE   | coimmunoprç  | Y567  |
| 9712716  | P39688 | FYN_MOUSE   | P09793 | CTLA4_MOUSE | coimmunoprç  | Y218  |
| 7623809  | P43405 | KSYK_HUMAN  | P20411 | FCERG_RAT   | coimmunoprç  | Y65   |
| 8810294  | P43405 | KSYK_HUMAN  | P30273 | FCERG_HUMAN | kinase sciç  | Y65   |
| 16675548 | O14508 | SOCS2_HUMAN | P10912 | GHR_HUMAN   | isothermal   | Y595  |
| 17666591 | O35717 | SOCS2_MOUSE | P19941 | GHR_RABIT   | two hybrid   | Y595  |
| 17666591 | Q62225 | CISH_MOUSE  | P19941 | GHR_RABIT   | two hybrid   | Y595  |
| 12387735 | P43405 | KSYK_HUMAN  | P26038 | MOES_HUMAN  | pull down    | Y205  |
| 8524328  | P46108 | CRK_HUMAN   | P22681 | CBL_HUMAN   | pull down    | Y774  |
| 8626543  | P46108 | CRK_HUMAN   | P22681 | CBL_HUMAN   | coimmunoprç  | Y774  |
| 8626543  | P46109 | CRKL_HUMAN  | P22681 | CBL_HUMAN   | pull down    | Y774  |
| 15556646 | P27986 | P85A_HUMAN  | P22681 | CBL_HUMAN   | far westernç | Y774  |
| 15556646 | P46109 | CRKL_HUMAN  | P22681 | CBL_HUMAN   | far westernç | Y774  |

|          |        |             |        |             |                   |
|----------|--------|-------------|--------|-------------|-------------------|
| 10930415 | P39688 | FYN_MOUSE   | Q9NZA1 | CLIC5_HUMAN | pull down Y33     |
| 9178760  | P19174 | PLCG1_HUMAN | P30530 | UFO_HUMAN   | far western Y821  |
| 9178760  | P19174 | PLCG1_HUMAN | P30530 | UFO_HUMAN   | coimmunopr Y821   |
| 9178760  | P27986 | P85A_HUMAN  | P30530 | UFO_HUMAN   | far western Y821  |
| 9178760  | P27986 | P85A_HUMAN  | P30530 | UFO_HUMAN   | coimmunopr Y821   |
| 9178760  | P62993 | GRB2_HUMAN  | P30530 | UFO_HUMAN   | far western Y821  |
| 9178760  | P62993 | GRB2_HUMAN  | P30530 | UFO_HUMAN   | coimmunopr Y821   |
| 7559499  | P26450 | P85A_MOUSE  | P19235 | EPOR_HUMAN  | coimmunopr Y504   |
| 7559499  | P23727 | P85A_BOVIN  | P19235 | EPOR_HUMAN  | pull down Y504    |
| 9573010  | P25911 | LYN_MOUSE   | P14753 | EPOR_MOUSE  | pull down Y503    |
| 15953601 | Q62077 | PLCG1_HUMAN | P14753 | EPOR_MOUSE  | phage disp Y503   |
| 8939605  | P62993 | GRB2_HUMAN  | P29353 | SHC1_HUMAN  | pull down Y349    |
| 9872323  | O89100 | GRAP2_MOUSE | P29353 | SHC1_HUMAN  | pull down Y349    |
| 9535915  | Q06124 | PTN11_HUMAN | P97710 | SHPS1_RAT   | pull down Y501    |
| 12928397 | O14796 | SH21B_HUMAN | Q9UIB8 | SLAF5_HUMAN | coimmunopr Y316   |
| 11514608 | Q9QUN3 | BLNK_MOUSE  | P70218 | M4K1_MOUSE  | pull down Y379    |
| 7537096  | P19174 | PLCG1_HUMAN | P10721 | KIT_HUMAN   | coimmunopr Y936   |
| 10377264 | P62993 | GRB2_HUMAN  | P10721 | KIT_HUMAN   | pull down Y936    |
| 10377264 | Q14451 | GRB7_HUMAN  | P10721 | KIT_HUMAN   | pull down Y936    |
| 7487883  | P43405 | KSYK_HUMAN  | P12318 | FCG2A_HUMAN | pull down Y288    |
| 15062102 | P47941 | CRKL_MOUSE  | P97318 | DAB1_MOUSE  | pull down Y220    |
| 11403293 | P27986 | P85A_HUMAN  | P35568 | IRS1_HUMAN  | enzymatic Y941    |
| 14632132 | P27986 | P85A_HUMAN  | P35568 | IRS1_HUMAN  | two hybrid Y941   |
| 8657103  | P19174 | PLCG1_HUMAN | P43405 | KSYK_HUMAN  | coimmunopr Y352   |
| 8657103  | P19174 | PLCG1_HUMAN | P43405 | KSYK_HUMAN  | pull down Y352    |
| 16410013 | P08487 | PLCG1_BOVIN | P48025 | KSYK_MOUSE  | nuclear ma Y346   |
| 16410013 | P08487 | PLCG1_BOVIN | P48025 | KSYK_MOUSE  | electropho Y346   |
| 7589433  | P27986 | P85A_HUMAN  | P08069 | IGF1R_HUMAN | coimmunopr Y1346  |
| 7642582  | P27986 | P85A_HUMAN  | P08069 | IGF1R_HUMAN | pull down Y1346   |
| 7642582  | Q06124 | PTN11_HUMAN | P08069 | IGF1R_HUMAN | pull down Y1346   |
| 8603569  | P27986 | P85A_HUMAN  | P08069 | IGF1R_HUMAN | two hybrid Y1346  |
| 8895367  | Q06124 | PTN11_HUMAN | P08069 | IGF1R_HUMAN | two hybrid Y1346  |
| 8895367  | Q06124 | PTN11_HUMAN | P08069 | IGF1R_HUMAN | beta galact Y1346 |
| 9415396  | Q64143 | P55G_HUMAN  | P08069 | IGF1R_HUMAN | two hybrid Y1346  |
| 9415396  | Q64143 | P55G_MOUSE  | P08069 | IGF1R_HUMAN | pull down Y1346   |
| 10026153 | P41240 | CSK_HUMAN   | P08069 | IGF1R_HUMAN | two hybrid Y1346  |
| 10026153 | P41240 | CSK_HUMAN   | P08069 | IGF1R_HUMAN | coimmunopr Y1346  |
| 10026153 | P41240 | CSK_HUMAN   | P08069 | IGF1R_HUMAN | two hybrid Y1346  |
| 11316748 | P46108 | CRK_HUMAN   | O14654 | IRS4_HUMAN  | pull down Y743    |
| 11316748 | P46108 | CRK_HUMAN   | O14654 | IRS4_HUMAN  | coimmunopr Y743   |
| 17666591 | P42230 | STA5A_MOUSE | P19941 | GHR_RABIT   | two hybrid Y534   |
| 17666591 | P42232 | STA5B_HUMAN | P19941 | GHR_RABIT   | two hybrid Y534   |
| 17666591 | P42232 | STA5B_MOUSE | P19941 | GHR_RABIT   | electropho Y534   |
| 7527043  | P62993 | GRB2_HUMAN  | P00533 | EGFR_HUMAN  | coimmunopr Y1092  |
| 8940013  | Q60631 | GRB2_MOUSE  | P00533 | EGFR_HUMAN  | surface pla Y1092 |
| 7518560  | P62993 | GRB2_HUMAN  | P00533 | EGFR_HUMAN  | coimmunopr Y1092  |
| 7993895  | P19174 | PLCG1_HUMAN | P00533 | EGFR_HUMAN  | cross-link Y1092  |
| 9153411  | P06240 | LCK_MOUSE   | P00533 | EGFR_HUMAN  | pull down Y1092   |
| 10229072 | P62993 | GRB2_HUMAN  | P00533 | EGFR_HUMAN  | coimmunopr Y1092  |
| 10229072 | P62993 | GRB2_HUMAN  | P00533 | EGFR_HUMAN  | pull down Y1092   |
| 10229072 | P62993 | GRB2_HUMAN  | P00533 | EGFR_HUMAN  | competitio Y1092  |
| 11896612 | P62993 | GRB2_HUMAN  | P00533 | EGFR_HUMAN  | coimmunopr Y1092  |
| 12577067 | P62993 | GRB2_HUMAN  | P00533 | EGFR_HUMAN  | pull down Y1092   |

|          |        |             |        |             |             |       |
|----------|--------|-------------|--------|-------------|-------------|-------|
| 14966128 | P40763 | STAT3_HUMAN | P00533 | EGFR_HUMAN  | pull down   | Y1092 |
| 9516477  | P19174 | PLCG1_HUMAN | P30556 | AGTR1_HUMAN | pull down   | Y319  |
| 9814969  | Q62689 | JAK2_RAT    | P25095 | AGTRA_RAT   | pull down   | Y319  |
| 9814969  | Q06124 | PTN11_HUMAN | P25095 | AGTRA_RAT   | pull down   | Y319  |
| 8605876  | P52630 | STAT2_HUMAN | P17181 | INAR1_HUMAN | pull down   | Y466  |
| 9121453  | P52630 | STAT2_HUMAN | P17181 | INAR1_HUMAN | inferred by | Y466  |
| 9677371  | P52630 | STAT2_HUMAN | P17181 | INAR1_HUMAN | anti bait   | Y466  |
| 12220192 | P52630 | STAT2_HUMAN | P17181 | INAR1_HUMAN | pull down   | Y466  |
| 12220192 | P52630 | STAT2_HUMAN | P17181 | INAR1_HUMAN | surface pla | Y466  |
| 17666591 | P42230 | STA5A_MOUSE | P19941 | GHR_RABIT   | two hybrid  | Y627  |
| 17666591 | P42232 | STA5B_MOUSE | P19941 | GHR_RABIT   | two hybrid  | Y627  |
| 17666591 | P42232 | STA5B_MOUSE | P19941 | GHR_RABIT   | electropho  | Y627  |
| 9223670  | P27986 | P85A_HUMAN  | P29376 | LTK_HUMAN   | coimmunopr  | Y753  |
| 11323411 | Q06124 | PTN11_HUMAN | Q13480 | GAB1_HUMAN  | coimmunopr  | Y627  |
| 11453982 | Q06124 | PTN11_HUMAN | Q13480 | GAB1_HUMAN  | surface pla | Y627  |
| 12855672 | Q06124 | PTN11_HUMAN | Q13480 | GAB1_HUMAN  | coimmunopr  | Y627  |
| 8673706  | P15498 | VAV_HUMAN   | Q13094 | LCP2_HUMAN  | coimmunopr  | Y128  |
| 8673706  | P15498 | VAV_HUMAN   | Q13094 | LCP2_HUMAN  | pull down   | Y128  |
| 9047237  | P15498 | VAV_HUMAN   | Q13094 | LCP2_HUMAN  | pull down   | Y128  |
| 10229072 | P16333 | NCK1_HUMAN  | Q13094 | LCP2_HUMAN  | coimmunopr  | Y128  |
| 10347175 | P15498 | VAV_HUMAN   | Q13094 | LCP2_HUMAN  | pull down   | Y128  |
| 8524328  | P46108 | CRK_HUMAN   | P22681 | CBL_HUMAN   | pull down   | Y700  |
| 9200440  | P15498 | VAV_HUMAN   | P22681 | CBL_HUMAN   | pull down   | Y700  |
| 15556646 | P27986 | P85A_HUMAN  | P22681 | CBL_HUMAN   | far western | Y700  |
| 15556646 | P46109 | CRKL_HUMAN  | P22681 | CBL_HUMAN   | far western | Y700  |
| 7493940  | P46109 | CRKL_HUMAN  | P49023 | PAXI_HUMAN  | pull down   | Y118  |
| 7537852  | Q04929 | CRK_CHICK   | P49024 | PAXI_CHICK  | experiment  | Y118  |
| 1314164  | P27986 | P85A_HUMAN  | P09619 | PGFRB_HUMAN | coimmunopr  | Y740  |
| 1330535  | P27986 | P85A_HUMAN  | P09619 | PGFRB_HUMAN | biophysical | Y740  |
| 7683666  | P23727 | P85A_BOVIN  | P09619 | PGFRB_HUMAN | surface pla | Y740  |
| 7730365  | P39688 | FYN_MOUSE   | P05622 | PGFRB_MOUSE | pull down   | Y739  |
| 7876130  | Q63787 | P85A_RAT    | P09619 | PGFRB_HUMAN | pull down   | Y740  |
| 8382612  | P27986 | P85A_HUMAN  | P09619 | PGFRB_HUMAN | nuclear ma  | Y740  |
| 8382774  | P23727 | P85A_BOVIN  | P09619 | PGFRB_HUMAN | coimmunopr  | Y740  |
| 8670861  | P27986 | P85A_HUMAN  | P09619 | PGFRB_HUMAN | nuclear ma  | Y740  |
| 9512716  | P23727 | P85A_BOVIN  | P09619 | PGFRB_HUMAN | competitio  | Y740  |
| 10644978 | Q91ZM2 | SH2B1_MOUSE | P05622 | PGFRB_MOUSE | competitio  | Y739  |
| 10644978 | Q91ZM2 | SH2B1_MOUSE | P05622 | PGFRB_MOUSE | coimmunopr  | Y739  |
| 10752619 | P27986 | P85A_HUMAN  | P09619 | PGFRB_HUMAN | isothermal  | Y740  |
| 11710529 | P27986 | P85A_HUMAN  | P09619 | PGFRB_HUMAN | two hybrid  | Y740  |
| 11896612 | P27986 | P85A_HUMAN  | P09619 | PGFRB_HUMAN | coimmunopr  | Y740  |
| 8524328  | P46108 | CRK_HUMAN   | P22681 | CBL_HUMAN   | pull down   | Y337  |
| 16888623 | P00519 | ABL1_HUMAN  | P15941 | MUC1_HUMAN  | coimmunopr  | Y1243 |
| 9360983  | P06241 | FYN_HUMAN   | P56945 | BCAR1_HUMAN | coimmunopr  | Y664  |
| 9360983  | P06241 | FYN_HUMAN   | P56945 | BCAR1_HUMAN | pull down   | Y664  |
| 10542110 | P12931 | SRC_HUMAN   | P56945 | BCAR1_HUMAN | fluorescenc | Y664  |
| 16245368 | P06239 | LCK_HUMAN   | Q63767 | BCAR1_RAT   | surface pla | Y762  |
| 16245368 | P06239 | LCK_HUMAN   | Q63767 | BCAR1_RAT   | pull down   | Y762  |
| 16245368 | P06239 | LCK_HUMAN   | Q63767 | BCAR1_RAT   | x-ray crys  | Y762  |
| 7493946  | Q06124 | PTN11_HUMAN | P06213 | INSR_HUMAN  | pull down   | Y1185 |
| 9742218  | Q9NRF1 | SH2B1_HUMAN | P06213 | INSR_HUMAN  | coimmunopr  | Y1185 |
| 9742218  | Q9NRF1 | SH2B1_HUMAN | P06213 | INSR_HUMAN  | two hybrid  | Y1185 |
| 8194526  | P46108 | CRK_HUMAN   | Q64010 | CRK_MOUSE   | pull down   | Y221  |

|          |        |             |        |             |             |       |
|----------|--------|-------------|--------|-------------|-------------|-------|
| 8605877  | P42224 | STAT1_HUMAN | P42224 | STAT1_HUMAN | coimmunopr  | Y701  |
| 8605877  | P42224 | STAT1_HUMAN | P42224 | STAT1_HUMAN | competitio  | Y701  |
| 8605877  | P42224 | STAT1_HUMAN | P42224 | STAT1_HUMAN | pull down   | Y701  |
| 8605877  | P52630 | STAT2_HUMAN | P42224 | STAT1_HUMAN | coimmunopr  | Y701  |
| 8605877  | P52630 | STAT2_HUMAN | P42224 | STAT1_HUMAN | competitio  | Y701  |
| 8605877  | P52630 | STAT2_HUMAN | P42224 | STAT1_HUMAN | pull down   | Y701  |
| 9630226  | P42224 | STAT1_HUMAN | P42224 | STAT1_HUMAN | x-ray crys  | Y701  |
| 9573010  | P25911 | LYN_MOUSE   | P14753 | EPOR_MOUSE  | pull down   | Y488  |
| 9281317  | P62994 | GRB2_RAT    | P10686 | PLCG1_RAT   | coimmunopr  | Y783  |
| 9281317  | P62994 | GRB2_RAT    | P08487 | PLCG1_BOVIN | pull down   | Y783  |
| 15764700 | P10686 | PLCG1_RAT   | P10686 | PLCG1_RAT   | coimmunopr  | Y783  |
| 16684964 | Q06124 | PTN11_HUMAN | P36888 | FLT3_HUMAN  | competitio  | Y589  |
| 16684964 | Q06124 | PTN11_HUMAN | P36888 | FLT3_HUMAN  | coimmunopr  | Y589  |
| 9281317  | P62994 | GRB2_RAT    | P10686 | PLCG1_RAT   | coimmunopr  | Y771  |
| 9281317  | P62994 | GRB2_RAT    | P08487 | PLCG1_BOVIN | pull down   | Y771  |
| 10377264 | P62993 | GRB2_HUMAN  | P10721 | KIT_HUMAN   | pull down   | Y703  |
| 14679216 | P24604 | TEC_MOUSE   | Q61152 | PTN18_MOUSE | pull down   | Y354  |
| 12878163 | P46108 | CRK_HUMAN   | P10721 | KIT_HUMAN   | pull down   | Y900  |
| 10978177 | P27986 | P85A_HUMAN  | Q13480 | GAB1_HUMAN  | pull down   | Y589  |
| 10978177 | P27986 | P85A_HUMAN  | Q13480 | GAB1_HUMAN  | coimmunopr  | Y589  |
| 11786908 | O00145 | SHIP1_HUMAN | P25445 | TNR6_HUMAN  | pull down   | Y291  |
| 15536091 | P62993 | GRB2_HUMAN  | P11137 | MAP2_HUMAN  | pull down   | Y67   |
| 15536091 | P62993 | GRB2_HUMAN  | P11137 | MAP2_HUMAN  | far western | Y67   |
| 15536091 | P62993 | GRB2_HUMAN  | P11137 | MAP2_HUMAN  | enzyme lin  | Y67   |
| 10022120 | P46109 | CRKL_HUMAN  | Q13191 | CBLB_HUMAN  | coimmunopr  | Y665  |
| 15143214 | P43404 | ZAP70_MOUSE | Q8R4V1 | NFAM1_MOUSE | pull down   | Y215  |
| 15143214 | P43405 | KSYK_HUMAN  | Q8R4V1 | NFAM1_MOUSE | pull down   | Y215  |
| 10681522 | Q06124 | PTN11_HUMAN | O95297 | MPZL1_HUMAN | coimmunopr  | Y241  |
| 7797556  | P27986 | P85A_HUMAN  | P00533 | EGFR_HUMAN  | competitio  | Y944  |
| 7518772  | P62993 | GRB2_HUMAN  | P18433 | PTPRA_HUMAN | pull down   | Y798  |
| 10698938 | P12931 | SRC_HUMAN   | P18433 | PTPRA_HUMAN | coimmunopr  | Y798  |
| 10698938 | P00523 | SRC_CHICK   | P18433 | PTPRA_HUMAN | pull down   | Y798  |
| 12834342 | P00523 | SRC_CHICK   | P18052 | PTPRA_MOUSE | fluorescenc | Y825  |
| 17440088 | P29353 | SHC1_HUMAN  | P37173 | TGFR2_HUMAN | coimmunopr  | Y284  |
| 8226808  | P29353 | SHC1_HUMAN  | P04629 | NTRK1_HUMAN | coimmunopr  | Y496  |
| 8226808  | P29353 | SHC1_HUMAN  | P04629 | NTRK1_HUMAN | competitio  | Y496  |
| 8662591  | P42227 | STAT3_MOUSE | P40189 | IL6RB_HUMAN | electropho  | Y814  |
| 8662591  | P42227 | STAT3_MOUSE | P40189 | IL6RB_HUMAN | competitio  | Y814  |
| 8662795  | P42224 | STAT1_HUMAN | P40189 | IL6RB_HUMAN | inferred b  | Y814  |
| 7681396  | P06241 | FYN_HUMAN   | P07333 | CSF1R_HUMAN | pull down   | Y809  |
| 1661130  | P06241 | FYN_HUMAN   | P09619 | PGFRB_HUMAN | coimmunopr  | Y857  |
| 12815057 | P22681 | CBL_HUMAN   | O43597 | SPY2_HUMAN  | coimmunopr  | Y55   |
| 9506989  | Q13322 | GRB10_HUMAN | P06213 | INSR_HUMAN  | protein tr  | Y1190 |
| 9742218  | Q9NRF1 | SH2B1_HUMAN | P06213 | INSR_HUMAN  | coimmunopr  | Y1190 |
| 9742218  | Q9NRF1 | SH2B1_HUMAN | P06213 | INSR_HUMAN  | two hybrid  | Y1190 |
| 17998938 | Q9UKW4 | VAV3_HUMAN  | Q9UM73 | ALK_HUMAN   | coimmunopr  | Y1283 |
| 10748052 | P62994 | GRB2_RAT    | P35739 | NTRK1_RAT   | pull down   | Y684  |
| 10748052 | P62994 | GRB2_RAT    | P35739 | NTRK1_RAT   | two hybrid  | Y684  |
| 10748052 | P62994 | GRB2_RAT    | P35739 | NTRK1_RAT   | coimmunopr  | Y684  |
| 16917505 | P27986 | P85A_HUMAN  | P30875 | SSR2_MOUSE  | coimmunopr  | Y71   |
| 16917505 | P27986 | P85A_HUMAN  | P30875 | SSR2_MOUSE  | surface pl  | Y71   |
| 10660620 | P29350 | PTN6_HUMAN  | Q9UKJ1 | PILRA_HUMAN | surface pl  | Y269  |
| 1314164  | P27986 | P85A_HUMAN  | P09619 | PGFRB_HUMAN | coimmunopr  | Y751  |



|          |        |             |        |             |             |      |
|----------|--------|-------------|--------|-------------|-------------|------|
| 1330535  | O00459 | P85B_HUMAN  | P09619 | PGFRB_HUMAN | biophysical | Y751 |
| 1330535  | P27986 | P85A_HUMAN  | P09619 | PGFRB_HUMAN | circular di | Y751 |
| 1330535  | P27986 | P85A_HUMAN  | P09619 | PGFRB_HUMAN | classical   | Y751 |
| 7536927  | P27986 | P85A_HUMAN  | P09619 | PGFRB_HUMAN | surface pla | Y751 |
| 7680644  | P27986 | P85A_HUMAN  | P09619 | PGFRB_HUMAN | cross-link  | Y751 |
| 7683666  | P23727 | P85A_BOVIN  | P09619 | PGFRB_HUMAN | surface pla | Y751 |
| 7692233  | P16333 | NCK1_HUMAN  | P09619 | PGFRB_HUMAN | pull down   | Y751 |
| 7692233  | P27986 | P85A_HUMAN  | P09619 | PGFRB_HUMAN | pull down   | Y751 |
| 7730365  | P39688 | FYN_MOUSE   | P05622 | PGFRB_MOUSE | pull down   | Y750 |
| 7876130  | Q63787 | P85A_RAT    | P09619 | PGFRB_HUMAN | pull down   | Y751 |
| 8382774  | P23727 | P85A_BOVIN  | P09619 | PGFRB_HUMAN | coimmunopr  | Y751 |
| 8564419  | P27986 | P85A_HUMAN  | P09619 | PGFRB_HUMAN | pull down   | Y751 |
| 8670861  | P27986 | P85A_HUMAN  | P09619 | PGFRB_HUMAN | nuclear ma  | Y751 |
| 9153411  | P27986 | P85A_HUMAN  | P09619 | PGFRB_HUMAN | pull down   | Y751 |
| 10336465 | P23727 | P85A_BOVIN  | P09619 | PGFRB_HUMAN | surface pla | Y751 |
| 10752619 | P27986 | P85A_HUMAN  | P09619 | PGFRB_HUMAN | isothermal  | Y751 |
| 11027258 | P16333 | NCK1_HUMAN  | P09619 | PGFRB_HUMAN | unspecific  | Y751 |
| 11710529 | P27986 | P85A_HUMAN  | P09619 | PGFRB_HUMAN | two hybrid  | Y751 |
| 16569213 | P27986 | P85A_HUMAN  | Q05030 | PGFRB_RAT   | pull down   | Y750 |
| 15557335 | P12931 | SRC_HUMAN   | Q8WUM4 | PDC6I_HUMAN | pull down   | Y319 |
| 15557335 | P12931 | SRC_HUMAN   | Q8WUM4 | PDC6I_HUMAN | coimmunopr  | Y319 |
| 18258597 | P62993 | GRB2_HUMAN  | Q6X936 | KIRR1_RAT   | coimmunopr  | Y637 |
| 9162084  | P12931 | SRC_HUMAN   | P16284 | PECA1_HUMAN | pull down   | Y713 |
| 9774457  | P29350 | PTN6_HUMAN  | P16284 | PECA1_HUMAN | pull down   | Y713 |
| 9774457  | P29350 | PTN6_HUMAN  | P16284 | PECA1_HUMAN | surface pla | Y713 |
| 9774457  | Q06124 | PTN11_HUMAN | P16284 | PECA1_HUMAN | pull down   | Y713 |
| 9774457  | Q06124 | PTN11_HUMAN | P16284 | PECA1_HUMAN | surface pla | Y713 |
| 10704309 | Q06124 | PTN11_HUMAN | P16284 | PECA1_HUMAN | lambda pha  | Y713 |
| 12535670 | P41499 | PTN11_RAT   | P16284 | PECA1_HUMAN | pull down   | Y713 |
| 10556798 | P29350 | PTN6_HUMAN  | P20138 | CD33_HUMAN  | coimmunopr  | Y358 |
| 14652006 | P29350 | PTN6_HUMAN  | Q7Z6A9 | BTLA_HUMAN  | coimmunopr  | Y282 |
| 14652006 | Q06124 | PTN11_HUMAN | Q7Z6A9 | BTLA_HUMAN  | coimmunopr  | Y282 |
| 12171928 | P06241 | FYN_HUMAN   | O15268 | SKAP1_HUMAN | coimmunopr  | Y271 |
| 12171928 | P62993 | GRB2_HUMAN  | O15268 | SKAP1_HUMAN | coimmunopr  | Y271 |
| 7509083  | P43403 | ZAP70_HUMAN | P20963 | CD3Z_HUMAN  | coimmunopr  | Y142 |
| 7528772  | P43403 | ZAP70_HUMAN | P20963 | CD3Z_HUMAN  | pull down   | Y142 |
| 7544002  | P29353 | SHC1_HUMAN  | P20963 | CD3Z_HUMAN  | nuclear ma  | Y142 |
| 8901551  | P43403 | ZAP70_HUMAN | P20963 | CD3Z_HUMAN  | enzymatic   | Y142 |
| 7761456  | P43403 | ZAP70_HUMAN | P07766 | CD3E_HUMAN  | surface pla | Y199 |
| 7761456  | P43405 | KSYK_HUMAN  | P07766 | CD3E_HUMAN  | surface pla | Y199 |
| 7761456  | P43405 | KSYK_HUMAN  | P07766 | CD3E_HUMAN  | pull down   | Y199 |
| 9698567  | P43405 | KSYK_HUMAN  | P07766 | CD3E_HUMAN  | x-ray crys  | Y199 |
| 11855827 | P43403 | ZAP70_HUMAN | P07766 | CD3E_HUMAN  | pull down   | Y199 |
| 10488096 | P27986 | P85A_HUMAN  | P29350 | PTN6_HUMAN  | pull down   | Y564 |
| 10488096 | P27986 | P85A_HUMAN  | P29350 | PTN6_HUMAN  | coimmunopr  | Y564 |
| 16649996 | P78314 | 3BP2_HUMAN  | P29350 | PTN6_HUMAN  | pull down   | Y564 |
| 16649996 | P78314 | 3BP2_HUMAN  | P29350 | PTN6_HUMAN  | surface pla | Y564 |
| 17094949 | P22681 | CBL_HUMAN   | Q7Z698 | SPRE2_HUMAN | coimmunopr  | Y228 |
| 9774102  | O60880 | SH21A_HUMAN | Q13291 | SLAF1_HUMAN | two hybrid  | Y281 |
| 10549287 | O14796 | SH21B_HUMAN | Q13291 | SLAF1_HUMAN | pull down   | Y281 |
| 10549287 | O60880 | SH21A_HUMAN | Q13291 | SLAF1_HUMAN | pull down   | Y281 |
| 10607564 | O60880 | SH21A_HUMAN | Q13291 | SLAF1_HUMAN | fluorescenc | Y281 |
| 11313386 | O00145 | SHIP1_HUMAN | Q13291 | SLAF1_HUMAN | pull down   | Y281 |

|          |        |              |        |             |            |       |
|----------|--------|--------------|--------|-------------|------------|-------|
| 11313386 | O00145 | SHIP1_HUMAN  | Q13291 | SLAF1_HUMAN | coimmunopr | Y281  |
| 11313386 | Q06124 | PTN11_HUMAN  | Q13291 | SLAF1_HUMAN | pull down  | Y281  |
| 11313386 | Q06124 | PTN11_HUMAN  | Q13291 | SLAF1_HUMAN | coimmunopr | Y281  |
| 11389028 | O60880 | SH21A_HUMAN  | Q13291 | SLAF1_HUMAN | two hybrid | Y281  |
| 11477068 | O60880 | SH21A_HUMAN  | Q13291 | SLAF1_HUMAN | fluorescen | Y281  |
| 11477068 | O60880 | SH21A_HUMAN  | Q13291 | SLAF1_HUMAN | coimmunopr | Y281  |
| 11477403 | P39688 | FYN_MOUSE    | Q9QUM4 | SLAF1_MOUSE | pull down  | Y288  |
| 11689425 | O35324 | SH21B_MOUSE  | Q9QUM4 | SLAF1_MOUSE | fluorescen | Y288  |
| 11689425 | O35324 | SH21B_MOUSE  | Q9QUM4 | SLAF1_MOUSE | two hybrid | Y288  |
| 11806999 | O60880 | SH21A_HUMAN  | Q13291 | SLAF1_HUMAN | coimmunopr | Y281  |
| 11823424 | O60880 | SH21A_HUMAN  | Q13291 | SLAF1_HUMAN | nuclear ma | Y281  |
| 12225753 | O60880 | SH21A_HUMAN  | Q13291 | SLAF1_HUMAN | nuclear ma | Y281  |
| 12545174 | O60880 | SH21A_HUMAN  | Q13291 | SLAF1_HUMAN | x-ray crys | Y281  |
| 14674764 | O60880 | SH21A_HUMAN  | Q13291 | SLAF1_HUMAN | fluorescen | Y281  |
| 12225753 | O60880 | SH21A_HUMAN  | Q9UIB8 | SLAF5_HUMAN | nuclear ma | Y281  |
| 9867848  | P35235 | PTN11_MOUSE  | P31809 | CEAM1_MOUSE | pull down  | Y488  |
| 11694516 | P29353 | SHC1_HUMAN   | P13688 | CEAM1_HUMAN | pull down  | Y493  |
| 11279131 | P00519 | ABL1_HUMAN   | P05067 | A4_HUMAN    | pull down  | Y757  |
| 11032808 | P00523 | SRC_CHICK    | P03372 | ESR1_HUMAN  | pull down  | Y537  |
| 14963108 | P12931 | SRC_HUMAN    | P03372 | ESR1_HUMAN  | pull down  | Y537  |
| 12070037 | Q06124 | PTN11_HUMAN  | P02730 | B3AT_HUMAN  | coimmunopr | Y359  |
| 12852788 | P62993 | GRB2_HUMAN   | O95869 | LY66F_HUMAN | pull down  | Y281  |
| 12852788 | P62993 | GRB2_HUMAN   | O95869 | LY66F_HUMAN | coimmunopr | Y281  |
| 12852788 | Q14451 | GRB7_HUMAN   | O95869 | LY66F_HUMAN | pull down  | Y281  |
| 12852788 | Q14451 | GRB7_HUMAN   | O95869 | LY66F_HUMAN | coimmunopr | Y281  |
| 7522233  | P62993 | GRB2_HUMAN   | P35235 | PTN11_MOUSE | coimmunopr | Y546  |
| 11432792 | P62993 | GRB2_HUMAN   | P35235 | PTN11_MOUSE | two hybrid | Y546  |
| 11684012 | P35235 | PTN11_MOUSE  | P35235 | PTN11_MOUSE | pull down  | Y546  |
| 11684012 | P62993 | GRB2_HUMAN   | P35235 | PTN11_MOUSE | pull down  | Y546  |
| 12403768 | O35718 | SOCS3_MOUSE  | P35235 | PTN11_MOUSE | pull down  | Y546  |
| 12403768 | O35718 | SOCS3_MOUSE  | P35235 | PTN11_MOUSE | surface pl | Y546  |
| 12531430 | P62994 | GRB2_RAT     | P35235 | PTN11_MOUSE | coimmunopr | Y546  |
| 11551923 | Q60631 | GRB2_MOUSE   | P35329 | CD22_MOUSE  | coimmunopr | Y822  |
| 10681522 | Q06124 | PTN11_HUMAN  | O95297 | MPZL1_HUMAN | coimmunopr | Y263  |
| 11877430 | P29320 | EPHA3_HUMAN  | Q96T51 | RUFY1_HUMAN | coimmunopr | Y389  |
| 10464310 | P46108 | CRK_HUMAN    | P11362 | FGFR1_HUMAN | xxx(Affi-G | Y463  |
| 9489702  | P19174 | PLCG1_HUMAN  | O43561 | LAT_HUMAN   | coimmunopr | Y220  |
| 9489702  | P62993 | GRB2_HUMAN   | O43561 | LAT_HUMAN   | coimmunopr | Y220  |
| 10811803 | P27986 | P85A_HUMAN   | O43561 | LAT_HUMAN   | coimmunopr | Y220  |
| 10811803 | P27986 | P85A_HUMAN   | O43561 | LAT_HUMAN   | pull down  | Y220  |
| 10811803 | P62993 | GRB2_HUMAN   | O43561 | LAT_HUMAN   | coimmunopr | Y220  |
| 10811803 | P62993 | GRB2_HUMAN   | O43561 | LAT_HUMAN   | pull down  | Y220  |
| 15029250 | O89100 | GRAP2_MOUSE  | O43561 | LAT_HUMAN   | x-ray crys | Y220  |
| 9182757  | Q60631 | GRB2_MOUSE   | Q8C180 | FRS2_MOUSE  | pull down  | Y306  |
| 15121872 | Q91ZM2 | O55033_MOUSE | Q62137 | JAK3_MOUSE  | coimmunopr | Y781  |
| 9632797  | P27986 | P85A_HUMAN   | Q02858 | TIE2_MOUSE  | two hybrid | Y1100 |
| 9632797  | P26450 | P85A_MOUSE   | Q02858 | TIE2_MOUSE  | pull down  | Y1100 |
| 10521483 | Q60631 | GRB2_MOUSE   | Q02858 | TIE2_MOUSE  | two hybrid | Y1100 |
| 10521483 | Q60631 | GRB2_MOUSE   | Q02858 | TIE2_MOUSE  | surface pl | Y1100 |
| 10521483 | Q60631 | GRB2_MOUSE   | Q02858 | TIE2_MOUSE  | pull down  | Y1100 |
| 10521483 | P62993 | GRB2_HUMAN   | Q02858 | TIE2_MOUSE  | coimmunopr | Y1100 |
| 10521483 | Q03160 | GRB7_MOUSE   | Q02858 | TIE2_MOUSE  | two hybrid | Y1100 |
| 10521483 | Q03160 | GRB7_MOUSE   | Q02858 | TIE2_MOUSE  | surface pl | Y1100 |

|          |        |             |        |             |            |       |
|----------|--------|-------------|--------|-------------|------------|-------|
| 10521483 | Q03160 | GRB7_MOUSE  | Q02858 | TIE2_MOUSE  | pull down  | Y1100 |
| 10521483 | Q14451 | GRB7_HUMAN  | Q02858 | TIE2_MOUSE  | coimmunopr | Y1100 |
| 15549731 | P29350 | PTN6_HUMAN  | Q8TDQ1 | CLM1_HUMAN  | coimmunopr | Y205  |
| 12598525 | P19174 | PLCG1_HUMAN | P35968 | VGFR2_HUMAN | pull down  | Y1008 |
| 7504175  | Q06124 | PTN11_HUMAN | P35570 | IRS1_RAT    | pull down  | Y1172 |
| 7513703  | Q06124 | PTN11_HUMAN | P35568 | IRS1_HUMAN  | surface pl | Y1179 |
| 8631859  | P39688 | FYN_MOUSE   | P35570 | IRS1_RAT    | pull down  | Y1172 |
| 8631859  | P39688 | FYN_MOUSE   | P35570 | IRS1_RAT    | anti bait  | Y1172 |
| 11602579 | Q06124 | PTN11_HUMAN | P16581 | LYAM2_HUMAN | coimmunopr | Y603  |
| 7529871  | Q60631 | GRB2_MOUSE  | P98083 | SHC1_MOUSE  | coimmunopr | Y423  |
| 8084588  | P62994 | GRB2_RAT    | P29353 | SHC1_HUMAN  | pull down  | Y427  |
| 8663178  | P62993 | GRB2_HUMAN  | P29353 | SHC1_HUMAN  | surface pl | Y427  |
| 8940013  | Q60631 | GRB2_MOUSE  | P29353 | SHC1_HUMAN  | surface pl | Y427  |
| 8995379  | P62993 | GRB2_HUMAN  | P29353 | SHC1_HUMAN  | pull down  | Y427  |
| 8995379  | Q13588 | GRAP_HUMAN  | P29353 | SHC1_HUMAN  | pull down  | Y427  |
| 9083103  | P62994 | GRB2_RAT    | P29353 | SHC1_HUMAN  | coimmunopr | Y427  |
| 9175774  | P62993 | GRB2_HUMAN  | P29353 | SHC1_HUMAN  | pull down  | Y427  |
| 9254595  | P62993 | GRB2_HUMAN  | P29353 | SHC1_HUMAN  | isothermal | Y427  |
| 9872323  | O89100 | GRAP2_MOUSE | P29353 | SHC1_HUMAN  | pull down  | Y427  |
| 9973396  | Q9ES52 | SHIP1_MOUSE | P29353 | SHC1_HUMAN  | surface pl | Y427  |
| 11827484 | P62993 | GRB2_HUMAN  | P29353 | SHC1_HUMAN  | x-ray crys | Y427  |
| 12213123 | P62993 | GRB2_HUMAN  | P29353 | SHC1_HUMAN  | surface pl | Y427  |
| 18056706 | P06241 | FYN_HUMAN   | Q9NWQ8 | PAG1_HUMAN  | coimmunopr | Y163  |
| 18056706 | P06241 | FYN_HUMAN   | Q9NWQ8 | PAG1_HUMAN  | peptide ar | Y163  |
| 9480911  | Q64010 | CRK_MOUSE   | P08069 | IGF1R_HUMAN | pull down  | Y973  |
| 10026153 | P41240 | CSK_HUMAN   | P08069 | IGF1R_HUMAN | two hybrid | Y973  |
| 10026153 | P41240 | CSK_HUMAN   | P08069 | IGF1R_HUMAN | coimmunopr | Y973  |
| 10026153 | P41240 | CSK_HUMAN   | P08069 | IGF1R_HUMAN | two hybrid | Y973  |
| 7528772  | P43403 | ZAP70_HUMAN | P20963 | CD3Z_HUMAN  | pull down  | Y83   |
| 8648092  | P43403 | ZAP70_HUMAN | P20963 | CD3Z_HUMAN  | surface pl | Y83   |
| 8648092  | P43403 | ZAP70_HUMAN | P20963 | CD3Z_HUMAN  | pull down  | Y83   |
| 8901551  | P43403 | ZAP70_HUMAN | P20963 | CD3Z_HUMAN  | enzymatic  | Y83   |
| 9185620  | P43403 | ZAP70_HUMAN | P20963 | CD3Z_HUMAN  | surface pl | Y83   |
| 10704231 | P43403 | ZAP70_HUMAN | P20963 | CD3Z_HUMAN  | enzymatic  | Y83   |
| 15832366 | P43403 | ZAP70_HUMAN | P20963 | CD3Z_HUMAN  | peptide ar | Y83   |
| 11714803 | O00145 | SHIP1_HUMAN | P24394 | IL4RA_HUMAN | pull down  | Y713  |
| 11714803 | P29350 | PTN6_HUMAN  | P24394 | IL4RA_HUMAN | pull down  | Y713  |
| 11416002 | P27986 | P85A_HUMAN  | P35568 | IRS1_HUMAN  | coimmunopr | Y612  |
| 16230374 | P27986 | P85A_HUMAN  | P35568 | IRS1_HUMAN  | pull down  | Y612  |
| 8631775  | P32577 | CSK_RAT     | P06239 | LCK_HUMAN   | surface pl | Y394  |
| 8631775  | P32577 | CSK_RAT     | P06239 | LCK_HUMAN   | two hybrid | Y394  |
| 7524477  | P41240 | CSK_HUMAN   | P06241 | FYN_HUMAN   | pull down  | Y420  |
| 11536047 | P40763 | STAT3_HUMAN | P07949 | RET_HUMAN   | coimmunopr | Y752  |
| 16407827 | P62993 | GRB2_HUMAN  | O14939 | PLD2_HUMAN  | pull down  | Y179  |
| 17666591 | P42230 | STA5A_MOUSE | P19941 | GHR_RABIT   | two hybrid | Y566  |
| 17666591 | P42232 | STA5B_MOUSE | P19941 | GHR_RABIT   | two hybrid | Y566  |
| 17666591 | P42232 | STA5B_MOUSE | P19941 | GHR_RABIT   | electropho | Y566  |
| 9162084  | P12931 | SRC_HUMAN   | P16284 | PECA1_HUMAN | pull down  | Y690  |
| 9312087  | Q06124 | PTN11_HUMAN | P16284 | PECA1_HUMAN | pull down  | Y690  |
| 9774457  | P29350 | PTN6_HUMAN  | P16284 | PECA1_HUMAN | pull down  | Y690  |
| 9774457  | P29350 | PTN6_HUMAN  | P16284 | PECA1_HUMAN | surface pl | Y690  |
| 9774457  | Q06124 | PTN11_HUMAN | P16284 | PECA1_HUMAN | pull down  | Y690  |
| 9774457  | Q06124 | PTN11_HUMAN | P16284 | PECA1_HUMAN | surface pl | Y690  |

|          |        |             |        |             |              |       |
|----------|--------|-------------|--------|-------------|--------------|-------|
| 10704309 | Q06124 | PTN11_HUMAN | P16284 | PECA1_HUMAN | lambda phage | Y690  |
| 12535670 | P41499 | PTN11_RAT   | P16284 | PECA1_HUMAN | pull down    | Y690  |
| 7680095  | P27986 | P85A_HUMAN  | P35568 | IRS1_HUMAN  | surface pla  | Y732  |
| 17700527 | P12931 | SRC_HUMAN   | P23743 | DGKA_HUMAN  | coimmunopr   | Y335  |
| 17700527 | P12931 | SRC_HUMAN   | P23743 | DGKA_HUMAN  | pull down    | Y335  |
| 10064597 | O35716 | SOCS1_MOUSE | Q62120 | JAK2_MOUSE  | two hybrid   | Y1007 |
| 10064597 | O35716 | SOCS1_MOUSE | Q62120 | JAK2_MOUSE  | coimmunopr   | Y1007 |
| 10421843 | O14543 | SOCS3_HUMAN | O60674 | JAK2_HUMAN  | pull down    | Y1007 |
| 10421843 | O15524 | SOCS1_HUMAN | O60674 | JAK2_HUMAN  | two hybrid   | Y1007 |
| 9890938  | Q14765 | STAT4_HUMAN | Q99665 | I12R2_HUMAN | fluorescenc  | Y800  |
| 10415122 | Q14765 | STAT4_HUMAN | Q99665 | I12R2_HUMAN | pull down    | Y800  |
| 14559241 | O14543 | SOCS3_HUMAN | Q99665 | I12R2_HUMAN | pull down    | Y800  |
| 8605877  | P42224 | STAT1_HUMAN | P52630 | STAT2_HUMAN | coimmunopr   | Y690  |
| 8605877  | P42224 | STAT1_HUMAN | P52630 | STAT2_HUMAN | competitio   | Y690  |
| 8605877  | P42224 | STAT1_HUMAN | P52630 | STAT2_HUMAN | pull down    | Y690  |
| 8605877  | P52630 | STAT2_HUMAN | P52630 | STAT2_HUMAN | coimmunopr   | Y690  |
| 8605877  | P52630 | STAT2_HUMAN | P52630 | STAT2_HUMAN | competitio   | Y690  |
| 8605877  | P52630 | STAT2_HUMAN | P52630 | STAT2_HUMAN | pull down    | Y690  |
| 8798676  | P06239 | LCK_HUMAN   | P43405 | KSYK_HUMAN  | two hybrid   | Y525  |
| 8798676  | P06239 | LCK_HUMAN   | P43405 | KSYK_HUMAN  | pull down    | Y525  |
| 8798676  | P06239 | LCK_HUMAN   | P43405 | KSYK_HUMAN  | coimmunopr   | Y525  |
| 7535778  | P19174 | PLCG1_HUMAN | P16234 | PGFRA_HUMAN | experiment   | Y1018 |
| 7493940  | P46109 | CRKL_HUMAN  | P49023 | PAXI_HUMAN  | pull down    | Y31   |
| 7537852  | Q04929 | CRK_CHICK   | P49024 | PAXI_CHICK  | experiment   | Y31   |
| 17666591 | O35717 | SOCS2_MOUSE | P19941 | GHR_RABIT   | two hybrid   | Y487  |
| 17666591 | Q62225 | CISH_MOUSE  | P19941 | GHR_RABIT   | coimmunopr   | Y487  |
| 15056653 | Q13882 | PTK6_HUMAN  | Q13882 | PTK6_HUMAN  | surface pla  | Y447  |
| 10704446 | P46108 | CRK_HUMAN   | P49024 | PAXI_CHICK  | pull down    | Y31   |
| 1656221  | P19174 | PLCG1_HUMAN | P11362 | FGFR1_HUMAN | pull down    | Y766  |
| 8321198  | P19174 | PLCG1_HUMAN | P11362 | FGFR1_HUMAN | anti bait    | Y766  |
| 12181353 | Q6PD21 | SHB_MOUSE   | P11362 | FGFR1_HUMAN | experiment   | Y766  |
| 18412956 | P27986 | P85A_HUMAN  | P11362 | FGFR1_HUMAN | pull down    | Y766  |
| 18412956 | P27986 | P85A_HUMAN  | P11362 | FGFR1_HUMAN | coimmunopr   | Y766  |
| 11316748 | P46108 | CRK_HUMAN   | O14654 | IRS4_HUMAN  | pull down    | Y717  |
| 11316748 | P46108 | CRK_HUMAN   | O14654 | IRS4_HUMAN  | coimmunopr   | Y717  |
| 16380958 | P41240 | CSK_HUMAN   | Q6GTX8 | LAIR1_HUMAN | 3 hybrid m   | Y281  |
| 10764762 | P29350 | PTN6_HUMAN  | Q6GTX8 | LAIR1_HUMAN | coimmunopr   | Y281  |
| 10764762 | P29350 | PTN6_HUMAN  | Q6GTX8 | LAIR1_HUMAN | pull down    | Y281  |
| 10206955 | P29350 | PTN6_HUMAN  | P20138 | CD33_HUMAN  | pull down    | Y340  |
| 10206955 | Q06124 | PTN11_HUMAN | P20138 | CD33_HUMAN  | pull down    | Y340  |
| 10206955 | P29350 | PTN6_HUMAN  | P20138 | CD33_HUMAN  | coimmunopr   | Y340  |
| 10206955 | Q06124 | PTN11_HUMAN | P20138 | CD33_HUMAN  | coimmunopr   | Y340  |
| 10556798 | P29350 | PTN6_HUMAN  | P20138 | CD33_HUMAN  | coimmunopr   | Y340  |
| 10556798 | P29350 | PTN6_HUMAN  | P20138 | CD33_HUMAN  | enzymatic    | Y340  |
| 9890995  | P29351 | PTN6_MOUSE  | P35329 | CD22_MOUSE  | coimmunopr   | Y777  |
| 9489702  | P19174 | PLCG1_HUMAN | O43561 | LAT_HUMAN   | coimmunopr   | Y200  |
| 9489702  | P62993 | GRB2_HUMAN  | O43561 | LAT_HUMAN   | coimmunopr   | Y200  |
| 10811803 | P27986 | P85A_HUMAN  | O43561 | LAT_HUMAN   | pull down    | Y200  |
| 10811803 | P27986 | P85A_HUMAN  | O43561 | LAT_HUMAN   | coimmunopr   | Y200  |
| 10811803 | P62993 | GRB2_HUMAN  | O43561 | LAT_HUMAN   | coimmunopr   | Y200  |
| 10811803 | P62993 | GRB2_HUMAN  | O43561 | LAT_HUMAN   | pull down    | Y200  |
| 15029250 | O89100 | GRAP2_MOUSE | O43561 | LAT_HUMAN   | x-ray crys   | Y200  |
| 10377409 | P27986 | P85A_HUMAN  | P15311 | EZRI_HUMAN  | pull down    | Y354  |

|          |           |             |        |             |                  |
|----------|-----------|-------------|--------|-------------|------------------|
| 11123912 | P27986    | P85A_HUMAN  | P03076 | MT_POVM3    | nuclear maçY322  |
| 17094949 | P22681    | CBL_HUMAN   | Q7Z698 | SPRE2_HUMAN | coimmunoprçY231  |
| 18056706 | P06241    | FYN_HUMAN   | Q9NWQ8 | PAG1_HUMAN  | coimmunoprçY181  |
| 18056706 | P06241    | FYN_HUMAN   | Q9NWQ8 | PAG1_HUMAN  | peptide arçY181  |
| 8628282  | P19174    | PLCG1_HUMAN | P07949 | RET_HUMAN   | competitioçY1015 |
| 8662982  | Q62077    | PLCG1_MOUSE | P07949 | RET_HUMAN   | two hybrid Y1015 |
| 8662982  | Q62077    | PLCG1_MOUSE | P07949 | RET_HUMAN   | pull down Y1015  |
| 9047383  | P08487    | PLCG1_BOVIN | P07949 | RET_HUMAN   | pull down Y1015  |
| 16569669 | Q62985    | SH2B1_RAT   | P07949 | RET_HUMAN   | two hybrid Y981  |
| 17471236 | Q62985    | SH2B1_RAT   | P07949 | RET_HUMAN   | two hybrid Y981  |
| 17471236 | Q62985    | SH2B1_RAT   | P07949 | RET_HUMAN   | pull down Y981   |
| 11827956 | Q9JID9    | SH2B2_MOUSE | Q61851 | FGFR3_MOUSE | lex-a dimeçY719  |
| 11827956 | Q9JID9    | SH2B2_MOUSE | Q61851 | FGFR3_MOUSE | coimmunoprçY719  |
| 11827956 | Q9JID9    | SH2B2_MOUSE | Q61851 | FGFR3_MOUSE | two hybrid Y719  |
| 18412956 | P27986    | P85A_HUMAN  | P11362 | FGFR1_HUMAN | pull down Y730   |
| 18412956 | P27986    | P85A_HUMAN  | P11362 | FGFR1_HUMAN | coimmunoprçY730  |
| 11316748 | P46108    | CRK_HUMAN   | O14654 | IRS4_HUMAN  | pull down Y779   |
| 11316748 | P46108    | CRK_HUMAN   | O14654 | IRS4_HUMAN  | coimmunoprçY779  |
| 1396585  | P19174    | PLCG1_HUMAN | P09619 | PGFRB_HUMAN | coimmunoprçY1021 |
| 7678051  | XP_542998 | PLCG1_DOG   | P09619 | PGFRB_HUMAN | coimmunoprçY1021 |
| 7876130  | P08487    | PLCG1_BOVIN | P09619 | PGFRB_HUMAN | pull down Y1021  |
| 8119896  | Q06124    | PTN11_HUMAN | P09619 | PGFRB_HUMAN | enzymatic çY1021 |
| 8181064  | P08487    | PLCG1_BOVIN | P09619 | PGFRB_HUMAN | nuclear maçY1021 |
| 8555205  | P08487    | PLCG1_BOVIN | P09619 | PGFRB_HUMAN | nuclear maçY1021 |
| 9989826  | O14492    | SH2B2_HUMAN | P09619 | PGFRB_HUMAN | pull down Y1021  |
| 10373546 | P10686    | PLCG1_RAT   | P09619 | PGFRB_HUMAN | surface plçY1021 |
| 11896612 | P19174    | PLCG1_HUMAN | P09619 | PGFRB_HUMAN | coimmunoprçY1021 |
| 15641795 | P19174    | PLCG1_HUMAN | P09619 | PGFRB_HUMAN | nuclear maçY1021 |
| 17620338 | P22681    | CBL_HUMAN   | P09619 | PGFRB_HUMAN | coimmunoprçY1021 |
| 7522233  | P62993    | GRB2_HUMAN  | P35235 | PTN11_MOUSE | coimmunoprçY304  |
| 9528781  | Q06124    | PTN11_HUMAN | P05532 | KIT_MOUSE   | coimmunoprçY569  |
| 14652006 | P29350    | PTN6_HUMAN  | Q7Z6A9 | BTLA_HUMAN  | coimmunoprçY257  |
| 14652006 | Q06124    | PTN11_HUMAN | Q7Z6A9 | BTLA_HUMAN  | coimmunoprçY257  |
| 7528772  | P43403    | ZAP70_HUMAN | P20963 | CD3Z_HUMAN  | pull down Y111   |
| 8901551  | P43403    | ZAP70_HUMAN | P20963 | CD3Z_HUMAN  | enzymatic çY111  |
| 10752619 | P43403    | ZAP70_HUMAN | P20963 | CD3Z_HUMAN  | isothermal Y111  |
| 11266449 | P29350    | PTN6_HUMAN  | Q78DX7 | ROS_MOUSE   | two hybrid Y2267 |
| 16765915 | P39688    | FYN_MOUSE   | Q9QYB8 | ADDB_MOUSE  | pull down Y489   |
| 11266449 | P29350    | PTN6_HUMAN  | P08922 | ROS_HUMAN   | pull down Y2274  |
| 11266449 | P29350    | PTN6_HUMAN  | P08922 | ROS_HUMAN   | coimmunoprçY2274 |
| 9079809  | P27986    | P85A_HUMAN  | P06127 | CD5_HUMAN   | surface plçY487  |
| 9079809  | P27986    | P85A_HUMAN  | P06127 | CD5_HUMAN   | pull down Y487   |
| 15886098 | P00519    | ABL1_HUMAN  | Q13671 | RIN1_HUMAN  | coimmunoprçY36   |
| 15886098 | P42684    | ABL2_HUMAN  | Q13671 | RIN1_HUMAN  | coimmunoprçY36   |
| 9516479  | Q14451    | GRB7_HUMAN  | P21860 | ERBB3_HUMAN | competitioçY1262 |
| 11551923 | P29351    | PTN6_MOUSE  | P35329 | CD22_MOUSE  | coimmunoprçY837  |
| 9380408  | P62993    | GRB2_HUMAN  | P09581 | CSF1R_MOUSE | two hybrid Y697  |
| 9857184  | O89100    | GRAP2_MOUSE | P09581 | CSF1R_MOUSE | two hybrid Y697  |
| 9857184  | O89100    | GRAP2_MOUSE | P09581 | CSF1R_MOUSE | pull down Y697   |
| 16407264 | O15524    | SOCS1_HUMAN | Q99683 | M3K5_HUMAN  | pull down Y718   |
| 14993273 | O00145    | SHIP1_HUMAN | Q9QZK7 | DOK3_MOUSE  | pull down Y343   |
| 16436051 | P62993    | GRB2_HUMAN  | Q7L591 | DOK3_HUMAN  | coimmunoprçY398  |
| 7510216  | P40763    | STAT3_HUMAN | P40763 | STAT3_HUMAN | coimmunoprçY705  |

|          |        |             |        |             |                 |
|----------|--------|-------------|--------|-------------|-----------------|
| 8662591  | P42227 | STAT3_MOUSE | P40763 | STAT3_HUMAN | electropho:Y705 |
| 8662591  | P42227 | STAT3_MOUSE | P40763 | STAT3_HUMAN | competitio:Y705 |
| 8662591  | P42224 | STAT1_HUMAN | P40763 | STAT3_HUMAN | electropho:Y705 |
| 8662591  | P42224 | STAT1_HUMAN | P40763 | STAT3_HUMAN | competitio:Y705 |
| 10209036 | Q06124 | PTN11_HUMAN | Q9Y3P8 | SIT1_HUMAN  | coimmunopr:Y148 |
| 10209036 | Q06124 | PTN11_HUMAN | Q9Y3P8 | SIT1_HUMAN  | competitio:Y148 |
| 15953601 | Q62077 | PLCG1_HUMAN | P14753 | EPOR_MOUSE  | phage disp:Y455 |
| 10978177 | P27986 | P85A_HUMAN  | Q13480 | GAB1_HUMAN  | pull down Y472  |
| 10978177 | P27986 | P85A_HUMAN  | Q13480 | GAB1_HUMAN  | coimmunopr:Y472 |
| 11445578 | P26450 | P85A_MOUSE  | Q9QYY0 | GAB1_MOUSE  | competitio:Y473 |
| 11445578 | P26450 | P85A_MOUSE  | Q9QYY0 | GAB1_MOUSE  | pull down Y473  |
| 7504175  | P62993 | GRB2_HUMAN  | P35570 | IRS1_RAT    | pull down Y895  |
| 7513703  | Q06124 | PTN11_HUMAN | P35568 | IRS1_HUMAN  | surface pl:Y896 |
| 8491186  | P62993 | GRB2_HUMAN  | P35570 | IRS1_RAT    | coimmunopr:Y895 |
| 8491186  | P62993 | GRB2_HUMAN  | P35570 | IRS1_RAT    | pull down Y895  |
| 8491186  | P62993 | GRB2_HUMAN  | P35570 | IRS1_RAT    | competitio:Y895 |
| 8631859  | P39688 | FYN_MOUSE   | P35570 | IRS1_RAT    | pull down Y895  |
| 8631859  | P39688 | FYN_MOUSE   | P35570 | IRS1_RAT    | anti bait (Y895 |
| 10602027 | P42229 | STA5A_HUMAN | P14784 | IL2RB_HUMAN | pull down Y536  |
| 10602027 | P51692 | STA5B_HUMAN | P14784 | IL2RB_HUMAN | pull down Y536  |
| 12200137 | Q15464 | SHB_HUMAN   | P14784 | IL2RB_HUMAN | pull down Y536  |
| 7807015  | P27986 | P85A_HUMAN  | P16410 | CTLA4_HUMAN | coimmunopr:Y201 |
| 9398332  | P27986 | P85A_HUMAN  | P16410 | CTLA4_HUMAN | pull down Y201  |
| 9712716  | P39688 | FYN_MOUSE   | P09793 | CTLA4_MOUSE | coimmunopr:Y201 |
| 9813138  | P27986 | P85A_HUMAN  | P16410 | CTLA4_HUMAN | coimmunopr:Y201 |
| 8657103  | P19174 | PLCG1_HUMAN | P43405 | KSYK_HUMAN  | coimmunopr:Y348 |
| 8657103  | P19174 | PLCG1_HUMAN | P43405 | KSYK_HUMAN  | pull down Y348  |
| 8986718  | P15498 | VAV_HUMAN   | Q00655 | KSYK_PIG    | coimmunopr:Y341 |
| 11672534 | P14234 | FGR_MOUSE   | P48025 | KSYK_MOUSE  | pull down Y342  |
| 16410013 | P08487 | PLCG1_BOVIN | P48025 | KSYK_MOUSE  | nuclear ma:Y342 |
| 16410013 | P08487 | PLCG1_BOVIN | P48025 | KSYK_MOUSE  | electropho:Y342 |
| 9151714  | P15498 | VAV_HUMAN   | P43403 | ZAP70_HUMAN | coimmunopr:Y315 |
| 16339550 | P46108 | CRK_HUMAN   | P43403 | ZAP70_HUMAN | pull down Y315  |
| 10409671 | P06241 | FYN_HUMAN   | O15117 | FYB_HUMAN   | pull down Y625  |
| 9392697  | P42226 | STAT6_HUMAN | P24394 | IL4RA_HUMAN | pull down Y603  |
| 7528537  | P29350 | PTN6_HUMAN  | P32927 | IL3RB_HUMAN | experiment:Y628 |
| 9162089  | P29350 | PTN6_HUMAN  | P32927 | IL3RB_HUMAN | pull down Y628  |
| 9162089  | Q06124 | PTN11_HUMAN | P32927 | IL3RB_HUMAN | pull down Y628  |
| 9973406  | Q06124 | PTN11_HUMAN | P32927 | IL3RB_HUMAN | pull down Y628  |
| 10704825 | P29353 | SHC1_HUMAN  | P32927 | IL3RB_HUMAN | coimmunopr:Y628 |
| 18046454 | P07332 | FES_HUMAN   | P15311 | EZRI_HUMAN  | coimmunopr:Y478 |
| 18046454 | P07332 | FES_HUMAN   | P15311 | EZRI_HUMAN  | pull down Y478  |
| 11432792 | Q06124 | PTN11_HUMAN | O43559 | FRS3_HUMAN  | two hybrid Y417 |
| 7935391  | P62993 | GRB2_HUMAN  | P09619 | PGFRB_HUMAN | coimmunopr:Y716 |
| 7935391  | P62993 | GRB2_HUMAN  | P09619 | PGFRB_HUMAN | competitio:Y716 |
| 8940081  | Q14451 | GRB7_HUMAN  | P09619 | PGFRB_HUMAN | pull down Y716  |
| 8940081  | Q14451 | GRB7_HUMAN  | P09619 | PGFRB_HUMAN | competitio:Y716 |
| 10660620 | P29350 | PTN6_HUMAN  | Q9UKJ1 | PILRA_HUMAN | surface pl:Y298 |
| 11689432 | P16333 | NCK1_HUMAN  | O70469 | DOK2_MOUSE  | coimmunopr:Y351 |
| 10428862 | P16333 | NCK1_HUMAN  | O60496 | DOK2_HUMAN  | pull down Y345  |
| 8574854  | P29350 | PTN6_HUMAN  | P43628 | KI2L3_HUMAN | pull down Y333  |
| 8648092  | P29350 | PTN6_HUMAN  | P43628 | KI2L3_HUMAN | pull down Y333  |
| 8648092  | P29350 | PTN6_HUMAN  | P43628 | KI2L3_HUMAN | surface pl:Y333 |

|          |        |             |        |             |             |       |
|----------|--------|-------------|--------|-------------|-------------|-------|
| 8648092  | Q06124 | PTN11_HUMAN | P43628 | KI2L3_HUMAN | pull down   | Y333  |
| 8648092  | Q06124 | PTN11_HUMAN | P43628 | KI2L3_HUMAN | surface pl  | Y333  |
| 8691146  | P29350 | PTN6_HUMAN  | P43626 | KI2L1_HUMAN | coimmunopr  | Y332  |
| 8691146  | P29350 | PTN6_HUMAN  | P43626 | KI2L1_HUMAN | pull down   | Y332  |
| 8691154  | P29350 | PTN6_HUMAN  | P43628 | KI2L3_HUMAN | coimmunopr  | Y333  |
| 8691154  | P29350 | PTN6_HUMAN  | P43628 | KI2L3_HUMAN | pull down   | Y333  |
| 9864141  | P40763 | STAT3_HUMAN | Q99062 | CSF3R_HUMAN | coimmunopr  | Y727  |
| 9864141  | P40763 | STAT3_HUMAN | Q99062 | CSF3R_HUMAN | pull down   | Y727  |
| 15574420 | P20936 | RASA1_HUMAN | Q13480 | GAB1_HUMAN  | coimmunopr  | Y317  |
| 16436051 | P62993 | GRB2_HUMAN  | Q7L591 | DOK3_HUMAN  | coimmunopr  | Y432  |
| 15240681 | P29350 | PTN6_HUMAN  | Q15116 | PDCD1_HUMAN | coimmunopr  | Y223  |
| 15240681 | Q06124 | PTN11_HUMAN | Q15116 | PDCD1_HUMAN | coimmunopr  | Y223  |
| 7761456  | P43403 | ZAP70_HUMAN | P07766 | CD3E_HUMAN  | surface pl  | Y188  |
| 7761456  | P43405 | KSYK_HUMAN  | P07766 | CD3E_HUMAN  | surface pl  | Y188  |
| 7761456  | P43405 | KSYK_HUMAN  | P07766 | CD3E_HUMAN  | pull down   | Y188  |
| 9698567  | P43405 | KSYK_HUMAN  | P07766 | CD3E_HUMAN  | x-ray crys  | Y188  |
| 11855827 | P06239 | LCK_HUMAN   | P07766 | CD3E_HUMAN  | pull down   | Y188  |
| 11855827 | P29353 | SHC1_HUMAN  | P07766 | CD3E_HUMAN  | pull down   | Y188  |
| 12024011 | Q5M824 | SHC1_RAT    | Q05655 | KPCD_HUMAN  | coimmunopr  | Y334  |
| 11544253 | P29350 | PTN6_HUMAN  | O95866 | G6B_HUMAN   | coimmunopr  | Y211  |
| 11544253 | Q06124 | PTN11_HUMAN | O95866 | G6B_HUMAN   | coimmunopr  | Y211  |
| 11877430 | P29320 | EPHA3_HUMAN | Q96T51 | RUFY1_HUMAN | coimmunopr  | Y400  |
| 16337946 | Q06124 | PTN11_HUMAN | Q08345 | DDR1_HUMAN  | coimmunopr  | Y740  |
| 7528772  | P43403 | ZAP70_HUMAN | P20963 | CD3Z_HUMAN  | pull down   | Y72   |
| 8648092  | P43403 | ZAP70_HUMAN | P20963 | CD3Z_HUMAN  | surface pl  | Y72   |
| 8648092  | P43403 | ZAP70_HUMAN | P20963 | CD3Z_HUMAN  | pull down   | Y72   |
| 8901551  | P43403 | ZAP70_HUMAN | P20963 | CD3Z_HUMAN  | enzymatic   | Y72   |
| 9185620  | P43403 | ZAP70_HUMAN | P20963 | CD3Z_HUMAN  | surface pl  | Y72   |
| 10704231 | P43403 | ZAP70_HUMAN | P20963 | CD3Z_HUMAN  | enzymatic   | Y72   |
| 15832366 | P43403 | ZAP70_HUMAN | P20963 | CD3Z_HUMAN  | peptide ar  | Y72   |
| 9160881  | P27986 | P85A_HUMAN  | P22681 | CBL_HUMAN   | two hybrid  | Y731  |
| 9414268  | P26450 | P85A_MOUSE  | P22681 | CBL_HUMAN   | coimmunopr  | Y731  |
| 9414268  | P26450 | P85A_MOUSE  | P22681 | CBL_HUMAN   | enzymatic   | Y731  |
| 9890970  | P39688 | FYN_MOUSE   | P22681 | CBL_HUMAN   | pull down   | Y731  |
| 15556646 | P27986 | P85A_HUMAN  | P22681 | CBL_HUMAN   | far western | Y731  |
| 15556646 | P46109 | CRKL_HUMAN  | P22681 | CBL_HUMAN   | far western | Y731  |
| 15062102 | P47941 | CRKL_MOUSE  | P97318 | DAB1_MOUSE  | pull down   | Y232  |
| 9692543  | Q07014 | LYN_RAT     | P28867 | KPCD_MOUSE  | coimmunopr  | Y52   |
| 16407827 | P62993 | GRB2_HUMAN  | O14939 | PLD2_HUMAN  | pull down   | Y169  |
| 14679216 | P24604 | TEC_MOUSE   | Q61152 | PTN18_MOUSE | pull down   | Y303  |
| 10749680 | P29353 | SHC1_HUMAN  | P35968 | VGFR2_HUMAN | beta galac  | Y1175 |
| 10749680 | P29353 | SHC1_HUMAN  | P35968 | VGFR2_HUMAN | two hybrid  | Y1175 |
| 10749680 | P29353 | SHC1_HUMAN  | P35968 | VGFR2_HUMAN | pull down   | Y1175 |
| 10749680 | P98077 | SHC2_HUMAN  | P35968 | VGFR2_HUMAN | pull down   | Y1175 |
| 10749680 | P98077 | SHC2_HUMAN  | P35968 | VGFR2_HUMAN | two hybrid  | Y1175 |
| 11387210 | Q62077 | PLCG1_MOUSE | P35918 | VGFR2_MOUSE | coimmunopr  | Y1173 |
| 11387210 | Q62077 | PLCG1_MOUSE | P35918 | VGFR2_MOUSE | pull down   | Y1173 |
| 12214271 | P29353 | SHC1_HUMAN  | P35968 | VGFR2_HUMAN | coimmunopr  | Y1175 |
| 15026417 | Q15464 | SHB_HUMAN   | P35968 | VGFR2_HUMAN | coimmunopr  | Y1175 |
| 15546884 | Q06124 | PTN11_HUMAN | Q99704 | DOK1_HUMAN  | coimmunopr  | Y337  |
| 15764601 | O43639 | NCK2_HUMAN  | P52799 | EFNB2_HUMAN | nuclear ma  | Y330  |
| 17027227 | P35235 | PTN11_MOUSE | Q62120 | JAK2_MOUSE  | pull down   | Y201  |
| 8798676  | P06239 | LCK_HUMAN   | P43405 | KSYK_HUMAN  | two hybrid  | Y526  |

|          |        |             |        |             |            |      |
|----------|--------|-------------|--------|-------------|------------|------|
| 8798676  | P06239 | LCK_HUMAN   | P43405 | KSYK_HUMAN  | pull down  | Y526 |
| 8798676  | P06239 | LCK_HUMAN   | P43405 | KSYK_HUMAN  | coimmunopr | Y526 |
| 15737992 | P22681 | CBL_HUMAN   | O14492 | SH2B2_HUMAN | pull down  | Y629 |
| 11331873 | P20936 | RASA1_HUMAN | O14543 | SOCS3_HUMAN | pull down  | Y221 |
| 11331873 | P20936 | RASA1_HUMAN | O14543 | SOCS3_HUMAN | coimmunopr | Y221 |
| 15504032 | P20936 | RASA1_HUMAN | Q03135 | CAV1_HUMAN  | pull down  | Y25  |
| 18070987 | P07948 | LYN_HUMAN   | Q9NWQ8 | PAG1_HUMAN  | structure  | Y299 |
| 1380456  | P27986 | P85A_HUMAN  | P35570 | IRS1_RAT    | coimmunopr | Y628 |
| 7680095  | P27986 | P85A_HUMAN  | P35568 | IRS1_HUMAN  | surface pl | Y632 |
| 7680644  | P27986 | P85A_HUMAN  | P35568 | IRS1_HUMAN  | cross-link | Y632 |
| 8382612  | P27986 | P85A_HUMAN  | P35568 | IRS1_HUMAN  | nuclear ma | Y632 |
| 11416002 | P27986 | P85A_HUMAN  | P35568 | IRS1_HUMAN  | coimmunopr | Y632 |
| 7568038  | P27986 | P85A_HUMAN  | P10747 | CD28_HUMAN  | coimmunopr | Y191 |
| 7584133  | P27986 | P85A_HUMAN  | P10747 | CD28_HUMAN  | coimmunopr | Y191 |
| 7584133  | P62993 | GRB2_HUMAN  | P10747 | CD28_HUMAN  | coimmunopr | Y191 |
| 7807015  | P27986 | P85A_HUMAN  | P10747 | CD28_HUMAN  | coimmunopr | Y191 |
| 8146197  | P27986 | P85A_HUMAN  | P10747 | CD28_HUMAN  | competitio | Y191 |
| 8183372  | P27986 | P85A_HUMAN  | P10747 | CD28_HUMAN  | coimmunopr | Y191 |
| 8621607  | P26450 | P85A_MOUSE  | P10747 | CD28_HUMAN  | coimmunopr | Y191 |
| 8621607  | P23727 | P85A_BOVIN  | P10747 | CD28_HUMAN  | pull down  | Y191 |
| 9417079  | P27986 | P55G_MOUSE  | P10747 | CD28_HUMAN  | coimmunopr | Y191 |
| 10820259 | P27986 | P85A_HUMAN  | P10747 | CD28_HUMAN  | coimmunopr | Y191 |
| 10820259 | P27986 | P85A_HUMAN  | P10747 | CD28_HUMAN  | pull down  | Y191 |
| 10820259 | O75791 | GRAP2_HUMAN | P10747 | CD28_HUMAN  | coimmunopr | Y191 |
| 10820259 | O75791 | GRAP2_HUMAN | P10747 | CD28_HUMAN  | pull down  | Y191 |
| 12384576 | P46108 | CRK_HUMAN   | P00519 | ABL1_HUMAN  | nuclear ma | Y226 |
| 9600917  | Q06124 | PTN11_HUMAN | P48357 | LEPR_HUMAN  | anti tag c | Y986 |
| 11342028 | Q06124 | PTN11_HUMAN | P48357 | LEPR_HUMAN  | surface pl | Y986 |
| 15143214 | P43404 | ZAP70_MOUSE | Q8R4V1 | NFAM1_MOUSE | pull down  | Y226 |
| 15143214 | P43405 | KSYK_HUMAN  | Q8R4V1 | NFAM1_MOUSE | pull down  | Y226 |
| 7597091  | P62993 | GRB2_HUMAN  | Q05397 | FAK1_HUMAN  | pull down  | Y925 |
| 7997267  | Q60631 | GRB2_MOUSE  | P34152 | FAK1_MOUSE  | experiment | Y963 |
| 8816475  | P62993 | GRB2_HUMAN  | P34152 | FAK1_MOUSE  | coimmunopr | Y963 |
| 8816475  | P62993 | GRB2_HUMAN  | P34152 | FAK1_MOUSE  | pull down  | Y963 |
| 9148935  | P12931 | SRC_HUMAN   | P34152 | FAK1_MOUSE  | coimmunopr | Y963 |
| 9148935  | P62993 | GRB2_HUMAN  | P34152 | FAK1_MOUSE  | coimmunopr | Y963 |
| 9830057  | P62993 | GRB2_HUMAN  | P07550 | ADRB2_HUMAN | coimmunopr | Y350 |
| 12881490 | Q60631 | GRB2_MOUSE  | P20444 | KPCA_MOUSE  | coimmunopr | Y657 |
| 10671560 | Q13094 | LCP2_HUMAN  | O15117 | FYB_HUMAN   | coimmunopr | Y559 |
| 10671560 | Q13094 | LCP2_HUMAN  | O15117 | FYB_HUMAN   | pull down  | Y559 |
| 8695788  | P62993 | GRB2_HUMAN  | Q14289 | FAK2_HUMAN  | pull down  | Y881 |
| 8918688  | P27986 | P85A_HUMAN  | P09564 | CD7_HUMAN   | competitio | Y222 |
| 8918688  | P23727 | P85A_BOVIN  | P09564 | CD7_HUMAN   | pull down  | Y222 |
| 7528537  | P29350 | PTN6_HUMAN  | P19235 | EPOR_HUMAN  | experiment | Y426 |
| 8639815  | Q06124 | PTN11_HUMAN | P14753 | EPOR_MOUSE  | pull down  | Y425 |
| 9774439  | Q9NSE2 | CISH_HUMAN  | P14753 | EPOR_MOUSE  | coimmunopr | Y425 |
| 10660611 | O00145 | SHIP1_HUMAN | P19235 | EPOR_HUMAN  | pull down  | Y426 |
| 10882725 | O14543 | SOCS3_HUMAN | P19235 | EPOR_HUMAN  | pull down  | Y426 |
| 11781573 | O14508 | SOCS2_HUMAN | P19235 | EPOR_HUMAN  | two hybrid | Y426 |
| 15953601 | Q62077 | PLCG1_HUMAN | P14753 | EPOR_MOUSE  | phage disp | Y425 |
| 10498895 | P06241 | FYN_HUMAN   | O09127 | EPHA8_MOUSE | anti bait  | Y615 |
| 9392697  | P29350 | PTN6_HUMAN  | P24394 | IL4RA_HUMAN | pull down  | Y575 |
| 9392697  | P42226 | STAT6_HUMAN | P24394 | IL4RA_HUMAN | pull down  | Y575 |



|          |        |              |        |              |            |       |
|----------|--------|--------------|--------|--------------|------------|-------|
| 15170389 | Q06124 | PTN11_HUMAN  | Q9UQC2 | GAB2_HUMAN   | pull down  | Y643  |
| 1382595  | P27986 | P85A_HUMAN   | P10721 | KIT_HUMAN    | coimmunopr | Y721  |
| 7509796  | P27986 | P85A_HUMAN   | P05532 | KIT_MOUSE    | coimmunopr | Y719  |
| 7537096  | O00459 | P85B_HUMAN   | P10721 | KIT_HUMAN    | coimmunopr | Y721  |
| 7537096  | P27986 | P85A_HUMAN   | P10721 | KIT_HUMAN    | coimmunopr | Y721  |
| 7513703  | Q06124 | PTN11_HUMAN  | P35568 | IRS1_HUMAN   | surface pl | Y1229 |
| 9535915  | Q06124 | PTN11_HUMAN  | P97710 | SHPS1_RAT    | pull down  | Y477  |
| 10704446 | P46108 | CRK_HUMAN    | P49024 | PAXI_CHICK   | pull down  | Y118  |
| 8673706  | P15498 | VAV_HUMAN    | Q13094 | LCP2_HUMAN   | coimmunopr | Y113  |
| 8673706  | P15498 | VAV_HUMAN    | Q13094 | LCP2_HUMAN   | pull down  | Y113  |
| 9047237  | P15498 | VAV_HUMAN    | Q13094 | LCP2_HUMAN   | pull down  | Y113  |
| 10229072 | P16333 | NCK1_HUMAN   | Q13094 | LCP2_HUMAN   | coimmunopr | Y113  |
| 10347175 | P15498 | VAV_HUMAN    | Q13094 | LCP2_HUMAN   | pull down  | Y113  |
| 16177062 | P78314 | 3BP2_HUMAN   | Q9BZW8 | CD244_HUMAN  | 3 hybrid m | Y342  |
| 10852966 | O60880 | SH21A_HUMAN  | Q99704 | DOK1_HUMAN   | pull down  | Y449  |
| 10852966 | O60880 | SH21A_HUMAN  | Q99704 | DOK1_HUMAN   | coimmunopr | Y449  |
| 9603468  | P20936 | RASA1_HUMAN  | P06127 | CD5_HUMAN    | pull down  | Y453  |
| 8849729  | P12931 | SRC_HUMAN    | Q14289 | FAK2_HUMAN   | pull down  | Y402  |
| 10521452 | P12931 | SRC_HUMAN    | Q14289 | FAK2_HUMAN   | pull down  | Y402  |
| 10867021 | P06241 | FYN_HUMAN    | Q14289 | FAK2_HUMAN   | pull down  | Y402  |
| 10867021 | P06241 | FYN_HUMAN    | Q14289 | FAK2_HUMAN   | coimmunopr | Y402  |
| 11149930 | P12931 | SRC_HUMAN    | Q14289 | FAK2_HUMAN   | coimmunopr | Y402  |
| 12063569 | P42679 | MATK_HUMAN   | Q14289 | FAK2_HUMAN   | pull down  | Y402  |
| 12063569 | P42679 | MATK_HUMAN   | Q14289 | FAK2_HUMAN   | coimmunopr | Y402  |
| 12454019 | P52735 | VAV2_HUMAN   | P00533 | EGFR_HUMAN   | pull down  | Y1172 |
| 11536047 | P40763 | STAT3_HUMAN  | P07949 | RET_HUMAN    | coimmunopr | Y928  |
| 15121872 | Q91ZM2 | O55033_MOUSE | Q62120 | JAK2_MOUSE   | coimmunopr | Y813  |
| 15767667 | O14492 | SH2B2_HUMAN  | O60674 | JAK2_HUMAN   | pull down  | Y813  |
| 15767667 | Q9NRF1 | SH2B1_HUMAN  | O60674 | JAK2_HUMAN   | pull down  | Y813  |
| 16914724 | Q9Z200 | SH2B2_RAT    | Q62120 | JAK2_MOUSE   | pull down  | Y813  |
| 16914724 | Q62985 | SH2B1_RAT    | Q62120 | JAK2_MOUSE   | pull down  | Y813  |
| 17565041 | Q9NRF1 | SH2B1_HUMAN  | O60674 | JAK2_HUMAN   | coimmunopr | Y813  |
| 7684160  | P27986 | P85A_HUMAN   | P15391 | CD19_HUMAN   | coimmunopr | Y500  |
| 12881490 | Q60631 | GRB2_MOUSE   | P6840  | KPCB_RAT     | coimmunopr | Y656  |
| 15196926 | P10686 | PLCG1_RAT    | P32239 | GASR_HUMAN   | surface pl | Y438  |
| 16963136 | P35235 | PTN11_MOUSE  | P32239 | GASR_HUMAN   | surface pl | Y438  |
| 16963136 | Q06124 | PTN11_HUMAN  | P32239 | GASR_HUMAN   | pull down  | Y438  |
| 16899217 | P62993 | GRB2_HUMAN   | Q9H204 | MED28_HUMAN  | coimmunopr | Y64   |
| 9892650  | P27986 | P85A_HUMAN   | P25963 | IKBA_HUMAN   | coimmunopr | Y42   |
| 9892650  | P27986 | P85A_HUMAN   | P25963 | IKBA_HUMAN   | competitio | Y42   |
| 7537362  | Q15464 | SHB_HUMAN    | P11362 | FGFR1_HUMAN  | peptide ar | Y776  |
| 8940081  | Q14451 | GRB7_HUMAN   | P09619 | PGFRB_HUMAN  | pull down  | Y775  |
| 8940081  | Q14451 | GRB7_HUMAN   | P09619 | PGFRB_HUMAN  | competitio | Y775  |
| 18301737 | P06241 | FYN_HUMAN    | P89654 | P89654_MHV68 | pull down  | Y127  |
| 18301737 | P15498 | VAV_HUMAN    | P89654 | P89654_MHV68 | pull down  | Y127  |
| 9430661  | P16333 | NCK1_HUMAN   | P54762 | EPHB1_HUMAN  | anti bait  | Y594  |
| 9430661  | Q9Z279 | Q9Z279_MOUSE | P54762 | EPHB1_HUMAN  | two hybrid | Y594  |
| 9864141  | P40763 | STAT3_HUMAN  | Q99062 | CSF3R_HUMAN  | coimmunopr | Y767  |
| 9864141  | P40763 | STAT3_HUMAN  | Q99062 | CSF3R_HUMAN  | pull down  | Y767  |
| 12163025 | P29350 | PTN6_HUMAN   | Q96LC7 | SIG10_HUMAN  | biochemica | Y667  |
| 1314163  | P23727 | P85A_BOVIN   | P09581 | CSF1R_MOUSE  | pull down  | Y721  |
| 9312046  | Q8CIH5 | PLCG2_MOUSE  | P07333 | CSF1R_HUMAN  | two hybrid | Y723  |
| 9312046  | Q8CIH5 | PLCG2_MOUSE  | P07333 | CSF1R_HUMAN  | pull down  | Y723  |

|          |        |              |        |             |             |       |
|----------|--------|--------------|--------|-------------|-------------|-------|
| 7657594  | P27986 | P85A_HUMAN   | P17948 | VGFR1_HUMAN | coimmunopr  | Y1213 |
| 7685273  | P06241 | FYN_HUMAN    | P09619 | PGFRB_HUMAN | pull down   | Y579  |
| 7685273  | P07947 | YES_HUMAN    | P09619 | PGFRB_HUMAN | pull down   | Y579  |
| 7685273  | P12931 | SRC_HUMAN    | P09619 | PGFRB_HUMAN | pull down   | Y579  |
| 7687537  | P06241 | FYN_HUMAN    | P09619 | PGFRB_HUMAN | pull down   | Y579  |
| 7730365  | P39688 | FYN_MOUSE    | P05622 | PGFRB_MOUSE | pull down   | Y578  |
| 9742401  | Q13239 | SLAP1_HUMAN  | P09619 | PGFRB_HUMAN | pull down   | Y579  |
| 9742401  | Q13239 | SLAP1_HUMAN  | P09619 | PGFRB_HUMAN | coimmunopr  | Y579  |
| 12706723 | P25020 | SRC_RSVH1    | P09619 | PGFRB_HUMAN | isothermal  | Y579  |
| 12706723 | P25020 | SRC_RSVH1    | P09619 | PGFRB_HUMAN | x-ray crys  | Y579  |
| 8816495  | P42226 | STAT6_HUMAN  | P24394 | IL4RA_HUMAN | fluorescen  | Y631  |
| 9651359  | P42226 | STAT6_HUMAN  | P24394 | IL4RA_HUMAN | pull down   | Y631  |
| 10764762 | P29350 | PTN6_HUMAN   | Q6GTX8 | LAIR1_HUMAN | coimmunopr  | Y251  |
| 10764762 | P29350 | PTN6_HUMAN   | Q6GTX8 | LAIR1_HUMAN | pull down   | Y251  |
| 11152665 | P12931 | SRC_HUMAN    | P15941 | MUC1_HUMAN  | pull down   | Y1229 |
| 11152665 | P12931 | SRC_HUMAN    | P15941 | MUC1_HUMAN  | coimmunopr  | Y1229 |
| 11483589 | P12931 | SRC_HUMAN    | P15941 | MUC1_HUMAN  | pull down   | Y1229 |
| 11572860 | Q06124 | PTN11_HUMAN  | Q9Z1S8 | GAB2_MOUSE  | coimmunopr  | Y603  |
| 15170389 | Q06124 | PTN11_HUMAN  | Q9UQC2 | GAB2_HUMAN  | pull down   | Y614  |
| 12606549 | O43639 | NCK2_HUMAN   | P52799 | EFNB2_HUMAN | circular d  | Y304  |
| 12606549 | O43639 | NCK2_HUMAN   | P52799 | EFNB2_HUMAN | nuclear ma  | Y304  |
| 15096211 | O55033 | O55033_MOUSE | P52800 | EFNB2_MOUSE | pull down   | Y307  |
| 15096211 | O55033 | O55033_MOUSE | P52800 | EFNB2_MOUSE | peptide ar  | Y307  |
| 15764601 | O43639 | NCK2_HUMAN   | P52799 | EFNB2_HUMAN | nuclear ma  | Y304  |
| 11865050 | P26450 | P85A_MOUSE   | Q06806 | TIE1_MOUSE  | pull down   | Y1113 |
| 7518560  | P62993 | GRB2_HUMAN   | P00533 | EGFR_HUMAN  | coimmunopr  | Y1110 |
| 7527043  | P62993 | GRB2_HUMAN   | P00533 | EGFR_HUMAN  | coimmunopr  | Y1110 |
| 14966128 | P40763 | STAT3_HUMAN  | P00533 | EGFR_HUMAN  | pull down   | Y1110 |
| 10318843 | P06239 | LCK_HUMAN    | P43403 | ZAP70_HUMAN | anti tag c  | Y319  |
| 10500481 | P27986 | P85A_HUMAN   | P06213 | INSR_HUMAN  | fluorescent | Y941  |
| 7730365  | P39688 | FYN_MOUSE    | P07333 | CSF1R_HUMAN | pull down   | Y561  |
| 7730365  | Q04736 | YES_MOUSE    | P07333 | CSF1R_HUMAN | coimmunopr  | Y561  |
| 7730365  | P05480 | SRC_MOUSE    | P07333 | CSF1R_HUMAN | coimmunopr  | Y561  |
| 7518560  | P29353 | SHC1_HUMAN   | P00533 | EGFR_HUMAN  | coimmunopr  | Y1197 |
| 7542744  | P29353 | SHC1_HUMAN   | P00533 | EGFR_HUMAN  | coimmunopr  | Y1197 |
| 7693694  | P19174 | PLCG1_HUMAN  | P00533 | EGFR_HUMAN  | pull down   | Y1197 |
| 8034616  | P29353 | SHC1_HUMAN   | P00533 | EGFR_HUMAN  | coimmunopr  | Y1197 |
| 8034616  | P29353 | SHC1_HUMAN   | P00533 | EGFR_HUMAN  | competitio  | Y1197 |
| 9544989  | P29353 | SHC1_HUMAN   | P00533 | EGFR_HUMAN  | experiment  | Y1197 |
| 9733788  | P29350 | PTN6_HUMAN   | P00533 | EGFR_HUMAN  | pull down   | Y1197 |
| 9461599  | P41240 | CSK_HUMAN    | P04626 | ERBB2_HUMAN | competitio  | Y1248 |
| 12122014 | P42679 | MATK_HUMAN   | P04626 | ERBB2_HUMAN | pull down   | Y1248 |
| 12791772 | Q06124 | PTN11_HUMAN  | P05106 | ITB3_HUMAN  | coimmunopr  | Y773  |

| start end | peptide_binder |
|-----------|----------------|
| 750 763   | ACPPEVYAIMRGC  |
| 750 763   | ACPPEVYAIMRGC  |
| 652 665   | ADERVDYVVVDQQ  |
| 652 665   | ADERVDYVVVDQQ  |
| 374 387   | STDTPIYSQVAPR  |
| 167 180   | AEGDEIYEDLMRS  |
| 167 180   | AEGDEIYEDLMRS  |
| 167 180   | AEGDEIYEDLMRS  |
| 285 298   | AENTITYSLLMHP  |
| 285 298   | AENTITYSLLMHP  |
| 302 315   | AENTITYSLLKHP  |
| 285 298   | AENTITYSLLMHP  |
| 587 600   | AEPVPDYTTVHTV  |
| 681 694   | AEPYNLYSSLKEL  |
| 1215 1228 | AFDNLYYWDQDPP  |
| 921 934   | AIKMQYRDSFLT   |
| 687 700   | AKAVDGYVKPQIK  |
| 687 700   | AKAVDGYVKPQIK  |
| 596 609   | APGMKVYIDPFTY  |
| 596 609   | APGMKVYIDPFTY  |
| 450 463   | APTSFGYDKPHVL  |
| 787 799   | AQAPPSYLDVLG   |
| 787 799   | AQAPPSYLDVLG   |
| 787 799   | AQAPPSYLDVLG   |
| 784 796   | AQAPPVYLDVLG   |
| 784 796   | AQAPPVYLDVLG   |
| 850 862   | AKEDVDYVTLKH   |
| 850 862   | AKEDVDYVTLKH   |
| 971 984   | ARDPQRYLVIQGD  |
| 971 984   | ARDPQRYLVIQGD  |
| 448 461   | ARSSDSYAVIDLK  |
| 272 285   | ASKKTIYTYIMAS  |
| 272 285   | ASKKTIYTYIMAS  |
| 992 1005  | ASSNPEYLSASDV  |
| 973 986   | ASVNPEYFSAADV  |
| 973 986   | ASVNPEYFSAADV  |
| 973 986   | ASVNPEYFSAADV  |
| 1205 1218 | CDPKFHVDNTAGI  |
| 1207 1220 | CDPKFHVDNTAGI  |

|           |               |
|-----------|---------------|
| 394 407   | CLREAQYSMLATW |
| 394 407   | CLREAQYSMLATW |
| 394 407   | CLREAQYSMLATW |
| 279 292   | SSKSVTYATVVP  |
| 1132 1145 | CSPQPEYVNQPDV |
| 1073 1086 | CWREKPYERPSFA |
| 1073 1086 | CWREKPYERPSFA |
| 170 183   | DAEKPFYVNVEFH |
| 678 691   | DARPAVYTQVQKP |
| 678 691   | DARPAVYTQVQKP |
| 678 691   | DARPSLYAQVQKP |
| 258 270   | DCGSPKYAYFNGC |
| 258 271   | DCGSQKYAYFNGC |
| 772 785   | DCLDGLYALMSRC |
| 297 310   | DDDKNIIYVDPML |
| 176 189   | DDEDDSYLEPDSP |
| 439 452   | EDSDEDYEKVPLP |
| 441 454   | DDSDEDYEKVPLP |
| 390 403   | DEPEGDYEEVLEP |
| 390 403   | DEPEGDYEEVLEP |
| 713 726   | DESTRSYVILSFE |
| 713 726   | DESTRSYVILSFE |
| 190 202   | EEQVHTYVNTTGV |
| 574 587   | DGHEYIYVDPMQL |
| 764 777   | DISSNYMAPYDN  |
| 755 768   | DIQRSLYDRPASY |
| 755 768   | DIQRSLYDRPASY |

|           |               |
|-----------|---------------|
| 755 768   | DIQRSLYDRPASY |
| 755 768   | DIQRSLYDRPASY |
| 755 768   | DIQRSLYDRPASY |
| 1182 1195 | DIYETDYRKGK   |
| 1182 1195 | DIYETDYRKGK   |
| 1182 1195 | DIYETDYRKGK   |
| 116 129   | DKMAEAYSEIGMK |
| 116 129   | DKMAEAYSEIGMK |
| 318 331   | GPASGLYASVCKQ |
| 318 331   | GPASGLYASVCKQ |
| 644 657   | DMGDEVYDDVDT  |
| 680 693   | DVGEEVYDDVDAS |
| 184 197   | DNAMLEYLKIAQD |
| 798 806   | DNDDDLYG      |
| 300 313   | DPCTTIYVAATEP |
| 308 321   | DPCTTIYVAATEP |
| 308 321   | DPCTTIYVAATEP |
| 444 457   | DPGALHYDYIDVE |
| 555 568   | DPQAVTYAEVKHS |
| 555 568   | DPQAVTYAEVKHS |
| 296 309   | DPQEVTYAQLNHC |
| 295 308   | DPQEVTYTQLNHC |
| 630 643   | KDPTNGYYNVRAH |
| 914 927   | ERRDQDYANLPSS |
| 7 20      | DSEGHLYTVPIRE |
| 1002 1015 | DTSSVLYTAVQPN |
| 1001 1014 | DTSSVLYTAVQPN |
| 1002 1015 | DTSSVLYTAVQPN |
| 1002 1015 | DTSSVLYTAVQPN |
| 1002 1015 | DTSSVLYTAVQPN |
| 309 322   | DYGHPVYIVQEMP |
| 309 322   | DYGHPVYIVQEMP |

|           |               |
|-----------|---------------|
| 309 322   | DYGHPVYIVQEMP |
| 154 167   | DYHNPGYLVVLPD |
| 154 167   | DYHNPGYLVVLPD |
| 446 459   | GALHYDYIDVEMT |
| 184 197   | EDAVLEYLKIAQD |
| 588 601   | EDDQEVYDDVAEQ |
| 577 590   | EDDQDVYDDVAEQ |
| 693 706   | EEDDDPYVPMRPG |
| 693 706   | EEDDDPYVPMRPG |
| 176 189   | EEDDDSYLEPDSF |
| 1192 1205 | EDEEYEMNRRRR  |
| 830 843   | EDESIHYSELVQF |
| 577 590   | EDSARVYENVGLM |
| 439 452   | EDSDEDYEKVPLP |
| 439 452   | EDSDEDYEKVPLP |
| 706 719   | EEADGVYAASGGL |
| 524 537   | EEDADSYENMDNP |
| 702 715   | EEDDDEYKIPSSH |
| 153 166   | EEDEDLYDCVENE |
| 153 166   | EEDEDLYDCVENE |
| 153 166   | EEDEDLYDCVENE |
| 308 321   | EEEEEEYMPMEDL |
| 308 321   | EEEEEEYMPMEDL |
| 308 321   | EEEEEEYMPMEDL |
| 317 330   | EEEEPQYEEIPIY |
| 310 323   | EEISAMYSSVNKP |
| 440 453   | EELDENYVPMNPN |
| 440 453   | EELDENYVPMNPN |
| 386 398   | LDPMHNYVNTENV |
| 343 355   | RPALLNYENLPSL |
| 898 911   | EGMPKSYLPQTVR |
| 360 373   | EHAQDTYLVLDKW |
| 429 442   | EHRQLNYIQVDLE |
| 429 442   | EHRQLNYIQVDLE |
| 560 573   | EINGNNYVYIDPT |
| 211 223   | EKQFQPYFIPIN  |
| 58 71     | EKSDAVYTGLNTR |
| 58 71     | EKSDGVYTGLSTR |
| 588 601   | EMPVPDYTSIHIV |
| 588 601   | EMPVPDYTSIHLV |
| 588 601   | EMPVPDYTSIHLV |
| 198 211   | EMYGVNYFSIKNK |
| 767 780   | ENEDDGYDVPKPP |



|           |                |
|-----------|----------------|
| 1085 1098 | FLPVPEYINQSV   |
| 312 325   | FLQLLKYIPPKAK  |
| 312 325   | FLQLLKYIPPKAK  |
| 312 325   | FLQLLKYIPPKAK  |
| 459 472   | FLRCINYVFFPSL  |
| 620 633   | FLSSCGYVSTDQL  |
| 620 633   | FLSSCGYVSTDQL  |
| 620 633   | FLSSCGYVSTDQL  |
| 746 759   | GCPGPVYRIMTQC  |
| 620 633   | GDKQVEYLDLDDL  |
| 620 633   | GDKQVEYLDLDDL  |
| 620 633   | GDKQVEYLDLDDL  |
| 121 134   | GEDDGDYESPNEE  |
| 693 706   | GEEDTEYMT PSSR |
| 111 124   | GEEHVYSFPNKQ   |
| 111 124   | SEEEHVYSFPNKQ  |
| 733 746   | GESDGGYMDMSKD  |
| 733 746   | GESDGGYMDMSKD  |
| 733 746   | GESDGGYMDMSKD  |
| 732 745   | GESDGGYMDMSKD  |
| 733 746   | GESDGGYMDMSKD  |
| 732 745   | GESDGGYMDMSKD  |
| 732 745   | GESDGGYMDMSKD  |
| 733 746   | GESDGGYMDMSKD  |
| 733 746   | GESDGGYMDMSKD  |
| 733 746   | GESDGGYMDMSKD  |
| 330 343   | GFREGFYLPDGR   |
| 1236 1249 | GGSSLSYTNPAVA  |
| 657 670   | GGWMEDYDYVHLQ  |
| 657 670   | GGWMEDYDYVHLQ  |
| 657 670   | GGWMEDYDYVHLQ  |
| 755 768   | GGWMEDYDYVHLQ  |
| 755 768   | GGWMEDYDYVHLQ  |
| 755 768   | GGWMEDYDYVHLQ  |
| 1178 1191 | GMTRDIYETDYR   |
| 1178 1191 | GMTRDIYETDYR   |
| 1178 1191 | GMTRDIYETDYR   |
| 214 227   | GPEPGPYAQPSVN  |



|           |               |
|-----------|---------------|
| 694 707   | GPKGTGYIKTELI |
| 481 494   | GPYSHPYENSLVP |
| 776 789   | GRNPGFYVEANPM |
| 776 789   | GRNPGFYVEANPM |
| 776 789   | GRNPGFYVEANPM |
| 582 595   | GSSDNEYFYVDFR |
| 582 595   | GSSDNEYFYVDFR |
| 764 777   | GTAEPDYGALYEG |
| 764 777   | GTAEPDYGALYEG |
| 696 709   | HAEAALYKNLLHS |
| 347 360   | LPMADTYAVVQKR |
| 893 906   | HAPAEMYDIMKTC |
| 582 595   | HDSEENYVPMNPN |
| 582 595   | HDSEENYVPMNPN |
| 284 297   | HGKKEAYDTLIKD |
| 60 73     | HGSQGTYSNTKEN |
| 60 73     | HGSQGTYSNTKEN |
| 60 73     | HGSQGTYSNTKEN |
| 658 671   | HLGSEEYDVPPRL |
| 208 221   | PPAESVYTSLQRR |
| 208 221   | PPAESVYTSLQRR |
| 234 247   | HQGPVIYAQLDHS |
| 937 950   | ICTIDVYMIMVKC |
| 791 802   | IDAFSDYANFK   |
| 791 802   | IDAFSDYANFK   |
| 791 802   | IDAFSDYANFK   |
| 818 829   | IDAFSDYANFK   |
| 277 290   | IFPYEEYASWKTE |
| 489 502   | IIENPQYFSDACV |
| 489 502   | IIENPQYFSDACV |
| 807 820   | ILPRQQYFKQNCS |
| 807 820   | ILPRQQYFKQNCS |
| 807 820   | ILPRQQYFKQNCS |
| 802 815   | IMNDSNYIVKGNA |
| 850 863   | IMRDSNYISKGST |
| 48 61     | IRNTNEYTEGPTV |
| 1183 1196 | IYETDYRKGKGGK |
| 1183 1196 | IYETDYRKGKGGK |
| 1183 1196 | IYETDYRKGKGGK |
| 1276 1289 | IYRASYRKGGCA  |
| 677 690   | IYSTDYRVRGGRT |
| 677 690   | IYSTDYRVRGGRT |
| 677 690   | IYSTDYRVRGGRT |
| 64 77     | IYVILRYAKMKTI |
| 64 77     | IYVILRYAKMKTI |
| 262 275   | KDDGIVYASLALS |
| 744 757   | KDESVDYVPMLDM |

|         |               |
|---------|---------------|
| 744 757 | KDESVDYVPMLDM |
| 743 756 | KDESIDYVPMLDM |
| 744 757 | KDESVDYVPMLDM |
| 743 756 | KDESVDYVPMLDM |
| 312 325 | KNDFIYHDRVDP  |
| 312 325 | KNDFIYHDRVDP  |
| 630 643 | KDPTNGYYNVRAH |
| 706 719 | KDTETVYSEVRKA |
| 351 364 | KDTSTEYSEVRTQ |
| 275 288 | KEAPTEYASICVR |
| 275 288 | KEAPTEYASICVR |
| 264 277 | KEEEDIYEVLPDE |
| 264 277 | KEEEDIYEVLPDE |
| 135 148 | KGHDGLYQGLSTA |
| 192 205 | KGQRDLYSGLNQR |
| 557 570 | KHKEDVYENLHTK |
| 221 234 | KIWMTGYEDYRHA |
| 274 287 | KKSLTIYAQVQKP |





|           |                 |
|-----------|-----------------|
| 683 696   | LNSDVQYTEVQVS   |
| 683 696   | LNSDVQYTEVQVS   |
| 725 738   | LPCTGDYMNMSPV   |
| 328 341   | LPPSSIYPSVLAS   |
| 328 341   | LPPSSIYPSVLAS   |
| 1000 1013 | LPQDKEYYKVKEP   |
| 793 806   | LPTHDGYLPSNID   |
| 793 806   | LPTHDGYLPSNID   |
| 793 806   | LPTHDGYLPSNID   |
| 683 696   | LQERRKYLKHRLI   |
| 518 531   | LRADENYYKAQTH   |
| 518 531   | LRADENYYKAQTH   |
| 518 531   | LRADENYYKAQTH   |
| 1011 1024 | LSADSGYIIPLPD   |
| 24 37     | LSEETPYSYPTGN   |
| 24 37     | LTEETPYSYPTGN   |
| 480 493   | LANIDFYAQVSDI   |
| 480 493   | LANIDFYAQVSDI   |
| 440 451   | LSSFTSYENPT     |
| 24 37     | LTEETPYSYPTGN   |
| 759 772   | LTSNQEYLDLSMP   |
| 710 723   | LVSSSDYMPMAPQ   |
| 710 723   | LVSSSDYMPMAPQ   |
| 274 287   | MAESITYAAVARH   |
| 274 287   | MAESITYAAVARH   |
| 274 287   | MAESITYAAVARH   |
| 333 346   | MDEELHYASLNFH   |
| 770 783   | MDDTVSYAILRFP   |
| 193 206   | MESIDDYVNVPEPES |
| 347 360   | MLRLQDYEEKTKK   |

|           |               |
|-----------|---------------|
| 315 328   | MPMEDLYLDILPE |
| 224 237   | MTGYEDYRHAPVR |
| 174 187   | MVEDCLYETVKEI |
| 174 187   | MVEDCLYETVKEI |
| 1008 1021 | MVKRRDYDLAAS  |
| 974 987   | NCSEEMYRLMLQC |
| 974 987   | NCSEEMYRLMLQC |
| 974 987   | NCSEEMYRLMLQC |
| 712 725   | SCTHDLYMIMREC |
| 712 725   | SCTHDLYMIMREC |
| 712 725   | SCTHDLYMIMREC |
| 723 736   | NCTNELYMMMRDC |
| 723 736   | NCTNELYMMMRDC |
| 772 785   | NDSESDYMFMAPG |
| 772 785   | NDSESDYMFMAPG |
| 1014 1027 | NEGDNDYIIPLPD |
| 297 310   | NEPVSDYINANII |
| 562 575   | NGNNYVYIDPTQL |
| 250 263   | NKPGIVYASLNHS |
| 250 263   | NKPGIVYASLNHS |
| 104 117   | NPQEGLYNELQKD |
| 104 117   | NPQEGLYNELQKD |
| 104 117   | NPQEGLYNELQKD |
| 2260 2273 | NQEGLNYMVLATK |
| 482 495   | NQFVPLYTDPQEV |
| 2267 2280 | NREGLNYMVLATE |
| 2267 2280 | NREGLNYMVLATE |
| 480 493   | NSSSDYDLHGAQ  |
| 480 493   | NSSSDYDLHGAQ  |
| 29 42     | PAQDPLYDVPNAS |
| 29 42     | PAQDPLYDVPNAS |
| 1255 1268 | PDEDEYMNRRQD  |
| 830 843   | EDESIHYSELVQF |
| 690 703   | SEGDSYKNIHLE  |
| 690 703   | SEGDSYKNIHLE  |
| 690 703   | SEGDSYKNIHLE  |
| 711 724   | PERDSRYSQPLHE |
| 336 349   | GTAEHLYENVCML |
| 391 404   | PGNEHLYENLCVL |
| 698 711   | PGSAAPYLKTKFI |

|         |               |
|---------|---------------|
| 698 711 | PGSAAPYLKTKFI |
| 141 154 | PGTPVKYSEVVLD |
| 141 154 | PGTPVKYSEVVLD |
| 448 461 | PHLKYLVLVSDS  |
| 465 478 | PIQEANYVPMPG  |
| 465 478 | PIQEANYVPMPG  |
| 466 479 | PIQEPNYVPMPG  |
| 466 479 | PIQEPNYVPMPG  |
| 888 901 | PKSPGEYVNIEFG |
| 889 902 | PKSPGEYVNIEFG |
| 888 901 | PKSPGEYVNIEFG |
| 529 542 | PLNTDAYLSLQEL |
| 529 542 | PLNTDAYLSLQEL |
| 529 542 | PLNTDAYLSLQEL |
| 194 207 | PLTTGVYVKMPPT |
| 341 354 | PMDTEVYESPYAD |
| 341 354 | PMDTEVYESPYAD |
| 334 347 | PMDTEVYESPYAD |
| 335 348 | PMDTEVYESPYAD |
| 335 348 | PMDTEVYESPYAD |
| 335 348 | PMDTEVYESPYAD |
| 308 321 | PMDTSVYESPYSD |
| 308 321 | PMDTSVYESPYSD |
| 618 631 | PPDDDIYDGIEEE |
| 596 609 | PPGEAGYKAFSSL |
| 621 634 | PPGSLEYLCLPAG |
| 471 484 | PPPPPVYEPVSYH |
| 471 484 | PPPPPVYEPVSYH |
| 410 423 | PPRQLNYIQVELK |
| 709 722 | PPSAELYSNALPV |
| 291 303 | PQNETLYSVLKA  |
| 344 357 | PLPDHIYDEPEGV |
| 338 351 | PRPDHIYDEPEGV |
| 326 339 | PTDIIVYTELPNA |
| 326 339 | PTDIIVYTELPNA |
| 326 339 | PTDIIVYTELPNA |

|           |               |
|-----------|---------------|
| 326 339   | PTDIIVYTELPNA |
| 326 339   | PTDIIVYTELPNA |
| 325 338   | PTDIIVYTELPNA |
| 325 338   | PTDIIVYTELPNA |
| 326 339   | PTDIIVYTELPNA |
| 326 339   | PTDIIVYTELPNA |
| 720 733   | PTLVQTYVLQGDP |
| 720 733   | PTLVQTYVLQGDP |
| 310 323   | PTPGNTYQIPRTF |
| 425 438   | PTTSPIYHNGQDL |
| 216 229   | PVFSVDYGELDFQ |
| 216 229   | PVFSVDYGELDFQ |
| 181 194   | PVPNPDYEPIRKG |
| 327 340   | QDNSGTYGKIWEG |
| 204 217   | QEPSLLYADLDHL |
| 204 217   | QEPSLLYADLDHL |
| 393 406   | QGLDEMYSDVVKQ |
| 733 746   | QGPTISYPMLLHV |
| 65 78     | QGQNQLYNELNLG |
| 724 737   | QIDSCTYEAMYNI |
| 225 238   | QKKEGVYDVPKSQ |
| 45 58     | QKKPTMYPEWKT  |
| 162 175   | QKYLENYLNRLLT |
| 296 309   | QDTSPHYQNLKEN |
| 1168 1181 | QQDGKDYIVLPIS |
| 1166 1179 | QQDGKDYIVLPMS |
| 1166 1179 | QQDGKDYIVLPMS |
| 1168 1181 | QQDGKDYIVLPIS |
| 1168 1181 | QQDGKDYIVLPIS |
| 330 343   | QRKKPLYWDLYEH |
| 323 333   | QSPANIYYKV    |
| 194 207   | QTPLAVYNSVSYK |
| 519 532   | RADENYYKAQTHG |



|         |               |
|---------|---------------|
| 519 532 | RADENYYKAQTHG |
| 519 532 | RADENYYKAQTHG |
| 622 632 | RAVENQYSFY    |
| 214 225 | REFLDQYDAPL   |
| 214 225 | REFLDQYDAPL   |
| 18 31   | REQGNIYKPNNKA |
| 292 305 | RFSSLSYKSREED |
| 621 634 | RKGNQDYMPPSPK |
| 625 638 | RKGSQDYMPPSPK |
| 184 197 | RLHSDYMNMTPR  |
| 219 232 | RNKPTVYGVSPNY |
| 979 992 | RQPFVKYATLISN |
| 979 992 | RQPFVKYATLISN |
| 219 232 | RRETEVYACMKEE |
| 219 232 | RRETEVYACMKEE |
| 918 931 | RSNDKVYENVTGL |
| 956 969 | RSNDKVYENVTGL |
| 343 356 | RSSLKAYGNGYSS |
| 651 663 | DFEGFSYVNPQFV |
| 552 565 | RTARGSYGYIKTT |
| 552 565 | RTARGSYGYIKTT |
| 874 887 | RTDDLVLNVMEL  |
| 215 228 | SAACVVYEDMSHS |
| 215 228 | SAACVVYEDMSHS |
| 419 432 | SAASFEYTILDPS |
| 418 431 | SPSSFYETILDPS |
| 418 431 | SPSSFYETILDPS |
| 419 432 | SAASFEYTILDPS |
| 419 432 | SAASFEYTILDPS |
| 419 432 | SAASFEYTILDPS |
| 418 431 | SPSSFYETILDPS |
| 608 621 | SAEPHTYEEPGRA |
| 568 581 | SAPTSQYQEFVHA |
| 568 581 | SAPTSQYQEFVHA |

|           |                |
|-----------|----------------|
| 636 649   | SDEKVDYVQVDKE  |
| 714 727   | SDSTNEYMDMKPG  |
| 712 725   | CDSSNEYMDMKPG  |
| 714 727   | SDSTNEYMDMKPG  |
| 714 727   | SDSTNEYMDMKPG  |
| 1222 1235 | SEDLSAYASISFQ  |
| 470 483   | PEDTLTYADLDMV  |
| 111 124   | SEEEHVYSFPNKQ  |
| 106 119   | SFEEDDYESPND   |
| 335 348   | SFNSTIYEVIGKS  |
| 442 455   | SHNSALYSQVQKS  |
| 442 455   | SHNSALYSQVQKS  |
| 446 459   | SHVDNEYSQPPRN  |
| 395 408   | SIESDIYAEIPDE  |
| 1165 1178 | SLDNPDYQQDFFP  |
| 921 934   | SLFDHIYTTQSDV  |
| 806 819   | SLFTPDPYELLTEN |
| 493 506   | SLGSQSYEDMRGI  |
| 623 668   | EFAGFSYTNPEFV  |
| 431 444   | SLSRLSYTTISTL  |
| 431 444   | SLSRLSYTTISTL  |
| 431 444   | SLSRLSYTTISTL  |
| 57 70     | SLVSQDYVNGTDQ  |
| 35 48     | SMKDEEYEQMVKE  |
| 35 48     | SMKDEEYEQMVKE  |
| 769 782   | SMPLDQYSPSFPD  |
| 768 781   | SNYMAPYDNYVPS  |
| 768 781   | SNYMAPYDNYVPS  |
| 120 133   | SPEENIYETANSE  |
| 120 133   | SPEENIYETANSE  |
| 587 600   | SPGMKIYIDPFTY  |
| 587 600   | SPGMKIYIDPFTY  |
| 760 773   | SPGPGHYLRCDST  |
| 760 773   | SPGPGHYLRCDST  |
| 660 673   | SQEELHYATLNFP  |
| 714 727   | SQGVDTYVEMRPV  |
| 716 729   | SQGVDTYVEMRPV  |
| 716 729   | SQGVDTYVEMRPV  |

|           |               |
|-----------|---------------|
| 1206 1219 | SSDDVRYVNAFKF |
| 572 585   | SSDGHEYIYVDPM |
| 571 584   | SSDGHEYIYVDPV |
| 572 585   | SSDGHEYIYVDPM |
| 624 637   | SSGEEGYKPFQDL |
| 624 637   | SSGEEGYKPFQDL |
| 244 257   | SSQEVTYAQLDHW |
| 244 257   | SSQEVTYAQLDHW |
| 1222 1235 | STDRSPYEKVSAG |
| 1222 1235 | STDRSPYEKVSAG |
| 1222 1235 | STDRSPYEKVSAG |
| 596 609   | STGSVDYLALDFQ |
| 607 620   | STGSVDYLALDFQ |
| 297 310   | SVFCPHYEKVSGD |
| 297 310   | SVFCPHYEKVSGD |
| 300 313   | SVFCPHYEKVSGD |
| 300 313   | SVFCPHYEKVSGD |
| 297 310   | SVFCPHYEKVSGD |
| 1107 1119 | LEARKAYVNMSLF |
| 1103 1116 | SVQNPVYHNQPLN |
| 1103 1116 | SVQNPVYHNQPLN |
| 1103 1116 | SVQNPVYHNQPLN |
| 312 325   | SVYESPYSDPEEL |
| 934 947   | SWTEPTYFYVTDY |
| 554 567   | SYEGNSYTFIDPT |
| 554 567   | SYEGNSYTFIDPT |
| 554 567   | SYEGNSYTFIDPT |
| 1190 1203 | TAENAEYLRVAPQ |
| 1241 1254 | TAENPEYLGLDVP |
| 1241 1254 | TAENPEYLGLDVP |
| 766 779   | TANNPLYKEATST |

| Pull down peptides | Thirteenmer     | Target | propr ot name | Tyr resi d |
|--------------------|-----------------|--------|---------------|------------|
| ETSKVI YDFI EKT    | ETSKVI YDFI EKT | O00401 | WASL          | 256        |
| ETSKVI YDFI EKT    | ETSKVI YDFI EKT | O00401 | WASL          | 256        |
| NETEDQYALMEDE      | NETEDQYALMEDE   | O00459 | PIK3R2        | 605        |
| EADSSSDp YVNMDFTKR | ADSSSDYVNMDFT   | O14654 | IRS4          | 921        |
| EADSSSDp YVNMDFTKR | ADSSSDYVNMDFT   | O14654 | IRS4          | 921        |
| EADSSSDp YVNMDFTKR | ADSSSDYVNMDFT   | O14654 | IRS4          | 921        |
| EADSSSDp YVNMDFTKR | ADSSSDYVNMDFT   | O14654 | IRS4          | 921        |
| PPASSLYSSPVNS      | PPASSLYSSPVNS   | O14964 | HGS           | 308        |
| PPASSLYSSPVNS      | PPASSLYSSPVNS   | O14964 | HGS           | 308        |
| KSKQPLYSSI VTV     | KSKQPLYSSI VTV  | O60245 | PCDH7         | 948        |
| KSKQPLYSSI VTV     | KSKQPLYSSI VTV  | O60245 | PCDH7         | 948        |
| DHNHLLYSTI PRM     | DHNHLLYSTI PRM  | O60716 | CTNND1        | 96         |
| QRKEVKYEAPQAT      | QRKEVKYEAPQAT   | O60784 | TOM1          | 386        |
| QRKEVKYEAPQAT      | QRKEVKYEAPQAT   | O60784 | TOM1          | 386        |
| TETKSLYPSSEI Q     | TETKSLYPSSEI Q  | O75886 | STAM2         | 192        |
| AFGTVYKGLW         | GAFGTVYKGLW P   | P00533 | EGFR          | 727        |
| RDPQRYLVI QG       | ARDPQRYLVI QGD  | P00533 | EGFR          | 978        |
| RDPQRYLVI QG       | ARDPQRYLVI QGD  | P00533 | EGFR          | 978        |
| TDSNFYRALMD        | PTDSNFYRALMDE   | P00533 | EGFR          | 998        |
| TDSNFYRALMD        | PTDSNFYRALMDE   | P00533 | EGFR          | 998        |
| TDSNFYRALMD        | PTDSNFYRALMDE   | P00533 | EGFR          | 998        |
| TDSNFYRALMD        | PTDSNFYRALMDE   | P00533 | EGFR          | 998        |
| TDSNFYRALMD        | PTDSNFYRALMDE   | P00533 | EGFR          | 998        |
| TDSNFYRALMD        | PTDSNFYRALMDE   | P00533 | EGFR          | 998        |
| VDADEYLI PQQ       | VVDADEYLI PQQG  | P00533 | EGFR          | 1016       |
| SFLQRYSSDPT        | DSFLQRYSSDPTG   | P00533 | EGFR          | 1069       |
| LPVPEYI NQSV       | FLPVPEYI NQSV P | P00533 | EGFR          | 1092       |
| VQNPVYHNOPL        | SVQNPVYHNOPLN   | P00533 | EGFR          | 1110       |
| VGNPEYLNTVQ        | AVGNPEYLNTVQP   | P00533 | EGFR          | 1138       |
| SVQNPVYHNOPLN      | SVQNPVYHNOPLN   | P00533 | EGFR          | 1110       |
| FI ENEEQEp YVQTVK  | ENEQEYVQTVKS    | P04083 | ANXA1         | 20         |
| AFGTVYKGI W        | GAFGTVYKGI W P  | P04626 | ERBB2         | 735        |
| FGAKPYDGI PA       | TFGAKPYDGI PAR  | P04626 | ERBB2         | 923        |
| LDSTFYRSLLE        | PLDSTFYRSLLED   | P04626 | ERBB2         | 1005       |
| SPQPEYVNQPD        | CSPQPEYVNQPDV   | P04626 | ERBB2         | 1139       |
| SPSSGYMPMNQ        | SSPSSGYMPMNQG   | P21860 | ERBB3         | 1054       |
| DEDEEYEMNRRR       | EDEDEEYEMNRR    | P21860 | ERBB3         | 1197       |
| DEEYEMNRRRRH       | DEEYEMNRRRRH    | P21860 | ERBB3         | 1199       |
| DEEYEMNRRRRH       | DEEYEMNRRRRH    | P21860 | ERBB3         | 1199       |
| LEELGYEYMDVGS      | SLEELGYEYMDVG   | P21860 | ERBB3         | 1222       |
| TPDEDYEMNRQR       | TTPDEDYEMNRQ    | P21860 | ERBB3         | 1260       |
| TPDEDYEMNRQR       | PDEDYEMNRQRD    | P21860 | ERBB3         | 1262       |
| GPGGDYAAMGA        | GGPGGDYAAMGAC   | P21860 | ERBB3         | 1276       |
| ASEQGYEEMRA        | PASEQGYEEMRAF   | P21860 | ERBB3         | 1289       |

|                  |                         |        |      |
|------------------|-------------------------|--------|------|
| LFDDPSYVNVQNL    | LFDDPSYVNVQNL P29353    | SHC1   | 427  |
| LFDDPSYVNVQNL    | LFDDPSYVNVQNL P29353    | SHC1   | 427  |
| LFDDPSYVNI QNL   | LFDDPSYVNI QNL P29353   | SHC1   | 427  |
| LHTDDGYMPMSPG    | LHTDDGYMPMSPG P35568    | IRS1   | 612  |
| RVDPNGYMMSPS     | RVDPNGYMMSPS P35568     | IRS1   | 662  |
| RVDPNGYMMSPS     | RVDPNGYMMSPS P35568     | IRS1   | 662  |
| ETSKLI YDFI EDQ  | ETSKLI YDFI EDQ P42768  | WAS    | 291  |
| ETSKLI YDFI EDQ  | ETSKLI YDFI EDQ P42768  | WAS    | 291  |
| GEEEHVYSFPNKQ    | GEEEHVYSFPNKQ P49023    | PXN    | 118  |
| GYNDDYEEESYFT    | GYNDDYEEESYFT P50402    | EMD    | 95   |
| YDEDSPYQNI KI L  | YDEDSPYQNI KI L P52788  | SMS    | 147  |
| YDEDSPYQNI KI L  | YDEDSPYQNI KI L P52788  | SMS    | 147  |
| VVDSGVYAVPPPA    | VVDSGVYAVPPPA P56945    | BCAR1  | 410  |
| I KEKLCYVALDFE   | I KEKLCYVALDFE P60709   | ACTB   | 218  |
| GNYRDNYDN        | GNYRDNYDN P98179        | RBM3   | 155  |
| LI NRMDYVEI NI D | LI NRMDYVEI NI D Q00341 | VGL    | 437  |
| VSSTHYLLPERP     | VSSTHYLLPERP Q07912     | ACK1   | 858  |
| VSSTHYLLPERP     | VSSTHYLLPERP Q07912     | ACK1   | 858  |
| SEELDENpYVPMNPNS | EELDENYVPMNPN Q13480    | GAB1   | 447  |
| PSTDPLYDTPDTR    | PSTDPLYDTPDTR Q13671    | RIN1   | 36   |
| PSTDPLYDTPDTR    | PSTDPLYDTPDTR Q13671    | RIN1   | 36   |
| AFGTVYKGI VW     | GAFGTVYKGI WWP Q15303   | ERBB4  | 733  |
| RDPQRYLVI QG     | ARDPQRYLVI QGD Q15303   | ERBB4  | 984  |
| MDAEEYLVPQA      | MMDAEEYLVPQAF Q15303    | ERBB4  | 1022 |
| SPPPAYTPMSG      | HSPPPAYTPMSGN Q15303    | ERBB4  | 1056 |
| KPKQEYLNPEVE     | DKPKQEYLNPEVEE Q15303   | ERBB4  | 1162 |
| LDNPEYHNASN      | ALDNPEYHNASNG Q15303    | ERBB4  | 1188 |
| KAEDEYVNEPL      | PKAEDEYVNEPLY Q15303    | ERBB4  | 1202 |
| VNEPLYLNTFA      | YVNEPLYLNTFAN Q15303    | ERBB4  | 1208 |
| LGKAEYLKNNI      | TLGKAEYLKNNI L Q15303   | ERBB4  | 1221 |
| LFDDPSYVNVQNL    | LFDDPSYVNVQNL Q15303    | ERBB4  | 427  |
| KL SLGQYDNDAGG   | KL SLGQYDNDAGG Q68CZ2   | TNS    | 780  |
| LTAEFLYDEVHPK    | LTAEFLYDEVHPK Q6IBS0    | TWF2   | 309  |
| TQPEPI YAESTKR   | TQPEPI YAESTKR Q86YV5   | SGK223 | 390  |
| AYADSYpYYEDGG    | AYADSYYYEDGGM Q8IVM0    | CCDC50 | 145  |
| GEDADpYTHFTNQSS  | DGEDADYTHFTNQ Q8IVM0    | CCDC50 | 279  |
| PKEDPI YDEPEGL   | PKEDPI YDEPEGL Q99704   | DOK1   | 362  |
| PKEDPI YDEPEGL   | PKEDPI YDEPEGL Q99704   | DOK1   | 362  |
| EKVTSPYWEERI     | EKVTSPYWEERI Q9NQC7     | CYLD   | 15   |
| PASVTDYQNVSFS    | PASVTDYQNVSFS Q9NZM3    | ITSN   | 858  |

| SH2 prot ei | SH2 prot | name | oper at or  |
|-------------|----------|------|-------------|
| P16333      | NCK2     |      | Mart i n    |
| O15357      | SHI P2   |      | Mart i n    |
| P23726      | PI K3R2  |      | Jesper *    |
| P27986      | PI K3R1  |      | Jesper *    |
| P62993      | GRB2     |      | Jesper      |
| Q06124      | PTPN11   |      | Jesper      |
| P16885      | PLCG2    |      | Jesper      |
| P20936      | RASA1    |      | Jesper      |
| P27986      | PI K3R1  |      | Jesper      |
| O15357      | SHI P2   |      | Mart i n    |
| Q06124      | PTPN11   |      | Mart i n    |
| O15357      | SHI P2   |      | Mart i n    |
| P20936      | RASA1    |      | Jesper      |
| Q06124      | PTPN11   |      | Jesper      |
| P52735      | VAV2     |      | Jesper      |
| P29353      | SHC1     |      | Schul t ze  |
| Q06124      | PTPN11   |      | Schul t ze  |
| P51692      | STAT5B   |      | Schul t ze* |
| P46109      | CRKL     |      | Schul t ze  |
| P41240      | CSK      |      | Schul t ze  |
| Q06124      | PTPN11   |      | Schul t ze  |
| P29353      | SHC1     |      | Schul t ze  |
| P51692      | STAT5B   |      | Schul t ze* |
| P29353      | SHC1     |      | Schul t ze  |
| Q06124      | PTPN11   |      | Schul t ze  |
| P22681      | CBL      |      | Schul t ze  |
| P62993      | GRB2     |      | Schul t ze  |
| P62993      | GRB2     |      | Schul t ze  |
| P62993      | GRB2     |      | Schul t ze  |
| P62993      | GRB2     |      | Jesper      |
| Q06124      | PTPN11   |      | Jesper      |
| P29353      | SHC1     |      | Schul t ze  |
| P27986      | PI K3R1  |      | Schul t ze  |
| P29353      | SHC1     |      | Schul t ze  |
| P62993      | GRB2     |      | Schul t ze  |
| P27986      | PI K3R1  |      | Schul t ze  |
| P27986      | PI K3R1  |      | Schul t ze  |
| P41240      | CSK      |      | Schul t ze  |
| P62993      | GRB2     |      | Schul t ze  |
| P27986      | PI K3R1  |      | Schul t ze  |
| P27986      | PI K3R1  |      | Schul t ze  |
| P62993      | GRB2     |      | Schul t ze  |
| P27986      | PI K3R1  |      | Schul t ze  |
| P27986      | PI K3R1  |      | Schul t ze  |

|        |         |          |
|--------|---------|----------|
| P20936 | RASA1   | Jesper   |
| P62993 | GRB2    | Jesper   |
| P62993 | GRB2    | Martin   |
| P27986 | PI K3R1 | Martin   |
| P27986 | PI K3R1 | Martin   |
| P27986 | PI K3R1 | Martin   |
| P16333 | NCK2    | Martin*  |
| O15357 | SHI P2  | Martin   |
| P46109 | CRKL    | Jesper   |
| P29353 | SHC1    | Jesper   |
| P62993 | GRB2    | Martin   |
| P20936 | RASA1   | Martin   |
| P20936 | RASA1   | Martin   |
| Q06124 | PTPN11  | Martin   |
| P62993 | GRB2    | Jesper   |
| Q06124 | PTPN11  | Martin   |
| P16885 | PLCG2   | Jesper   |
| Q06124 | PTPN11  | Jesper   |
| P23726 | PI K3R2 | Jesper*  |
| P16333 | NCK2    | Martin*  |
| P20936 | RASA1   | Martin   |
| P29353 | SHC1    | Schultze |
| Q06124 | PTPN11  | Schultze |
| P46109 | CRKL    | Schultze |
| O00459 | PI K3R2 | Schultze |
| P62993 | GRB2    | Jesper   |
| P62993 | GRB2    | Jesper   |
| P20936 | RASA1   | Martin   |
| P41240 | CSK     | Jesper   |
| P20936 | RASA1   | Jesper   |
| P52735 | VAV2    | Jesper   |
| P16333 | NCK2    | Jesper*  |
| P20936 | RASA1   | Jesper   |
| P27986 | PI K3R1 | Jesper*  |
| P62993 | GRB2    | Martin   |

| SH2-domain containing p | Observed by LC-MS in HeLa? | Uniprot ID | Predictor |
|-------------------------|----------------------------|------------|-----------|
| ABL1                    | YES                        | P00519     | YES       |
| ABL2                    | YES                        | P42684     | YES       |
| BLK                     | YES                        | P51451     | YES       |
| CRK                     | YES                        | P46108     | YES       |
| CRKL                    | YES                        | P46109     | YES       |
| CSK                     | YES                        | P41240     | YES       |
| FER                     | YES                        | P16591     | YES       |
| FRK                     | YES                        | P42685     | YES       |
| FYN                     | YES                        | P06241     | YES       |
| GRB10                   | YES                        | Q13322     | YES       |
| GRB2                    | YES                        | P62993     | YES       |
| HCK                     | YES                        | P08631     | YES       |
| LYN                     | YES                        | P07948     | YES       |
| P55G                    | YES                        | Q92569     | YES       |
| P85A                    | YES                        | P27986     | YES       |
| P85B                    | YES                        | O00459     | YES       |
| PLCG1                   | YES                        | P19174     | YES       |
| PTK6                    | YES                        | Q13882     | YES       |
| PTN11                   | YES                        | Q06124     | YES       |
| RASA1                   | YES                        | P20936     | YES       |
| SH23A                   | YES                        | Q9BRG2     | YES       |
| SHC1                    | YES                        | P29353     | YES       |
| SHIP2                   | YES                        | O15357     | YES       |
| SRC                     | YES                        | P12931     | YES       |
| TENS1                   | YES                        | Q9HBL0     | YES       |
| TENS3                   | YES                        | Q68CZ2     | YES       |
| VAV2                    | YES                        | P52735     | YES       |
| YES                     | YES                        | P07947     | YES       |
| BCAR3                   | YES                        | O75815     | NO        |
| JAK1                    | YES                        | P23458     | NO        |
| LCK                     | YES                        | P06239     | NO        |
| NCK1                    | YES                        | P16333     | NO        |
| RIN1                    | YES                        | Q13671     | NO        |
| SH24A                   | YES                        | Q9H788     | NO        |
| SHB                     | YES                        | Q15464     | NO        |
| SPT6H                   | YES                        | Q7KZ85     | NO        |
| STA5A                   | YES                        | P42229     | NO        |
| STA5B                   | YES                        | P51692     | NO        |
| STAT1                   | YES                        | P42224     | NO        |
| STAT2                   | YES                        | P52630     | NO        |
| STAT3                   | YES                        | P40763     | NO        |
| STAT6                   | YES                        | P42226     | NO        |
| TENS4                   | YES                        | Q8IZW8     | NO        |



|       |     |        |    |
|-------|-----|--------|----|
| TYK2  | YES | P29597 | NO |
| VAV3  | YES | Q9UKW4 | NO |
| 3BP2  | NO  | P78314 |    |
| AFAP1 | NO  | Q8N556 |    |
| BCR   | NO  | P11274 |    |
| BLNK  | NO  | Q8WV28 |    |
| BMX   | NO  | P51813 |    |
| BTK   | NO  | Q06187 |    |
| CBL   | NO  | P22681 |    |
| CBLB  | NO  | Q13191 |    |
| CBLC  | NO  | Q9ULV8 |    |
| CHIN  | NO  | P15882 |    |
| CHIO  | NO  | P52757 |    |
| CISH  | NO  | Q9NSE2 |    |
| DAPP1 | NO  | Q9UN19 |    |
| FES   | NO  | P07332 |    |
| FGR   | NO  | P09769 |    |
| FYB   | NO  | O15117 |    |
| GRAP  | NO  | Q13588 |    |
| GRAP2 | NO  | O75791 |    |
| GRB14 | NO  | Q14449 |    |
| GRB7  | NO  | Q14451 |    |
| HSH2D | NO  | Q96JZ2 |    |
| ITBP2 | NO  | Q9UKP3 |    |
| ITK   | NO  | Q08881 |    |
| JAK2  | NO  | O60674 |    |
| JAK3  | NO  | P52333 |    |
| KSYK  | NO  | P43405 |    |
| LCP2  | NO  | Q13094 |    |
| LRP2  | NO  | P98164 |    |
| MATK  | NO  | P42679 |    |
| MIST  | NO  | Q7Z7G1 |    |
| NCK2  | NO  | O43639 |    |
| PLCG2 | NO  | P16885 |    |
| PTN6  | NO  | P29350 |    |
| RIN2  | NO  | Q8WYP3 |    |
| RIN3  | NO  | Q8TB24 |    |
| S18L1 | NO  | O75177 |    |
| S18L2 | NO  | Q9UHA2 |    |
| SH21A | NO  | O60880 |    |
| SH21B | NO  | O14796 |    |
| SH22A | NO  | Q9NP31 |    |
| SH24B | NO  | Q5SQS7 |    |
| SH2B1 | NO  | Q9NRF2 |    |

|       |    |        |
|-------|----|--------|
| SH2B2 | NO | O14492 |
| SH2B3 | NO | Q9UQQ2 |
| SH2D3 | NO | Q8N5H7 |
| SH2D5 | NO | Q6ZV89 |
| SH2D6 | NO | Q7Z4S9 |
| SHC2  | NO | P98077 |
| SHC3  | NO | Q92529 |
| SHC4  | NO | Q6S5L8 |
| SHCBP | NO | Q8NEM2 |
| SHD   | NO | Q96IW2 |
| SHE   | NO | Q5VZ18 |
| SHF   | NO | Q7M4L6 |
| SHIP1 | NO | Q92835 |
| SHPS1 | NO | P78324 |
| SLAF1 | NO | Q13291 |
| SLAF5 | NO | Q9UIB8 |
| SLAP1 | NO | Q13239 |
| SLAP2 | NO | Q9H6Q3 |
| SOCS1 | NO | O15524 |
| SOCS2 | NO | O14508 |
| SOCS3 | NO | O14543 |
| SOCS4 | NO | Q8WXH5 |
| SOCS5 | NO | O75159 |
| SOCS6 | NO | O14544 |
| SOCS7 | NO | O14512 |
| SRMS  | NO | Q9H3Y6 |
| SSXT  | NO | Q15532 |
| STAP1 | NO | Q9ULZ2 |
| STAP2 | NO | Q9UGK3 |
| STAT4 | NO | Q14765 |
| TEC   | NO | P42680 |
| TENC1 | NO | Q63HR2 |
| TM1L1 | NO | O75674 |
| TXK   | NO | P42681 |
| VAV   | NO | P15498 |
| YO025 | NO | A6NKC9 |
| YQ012 | NO | Q8TC17 |
| ZAP70 | NO | P43403 |

## Supplemental Information

### Extended Results

#### *Reproducibility of chip experiments*

The correlation coefficient of the results of the triplicate arrays represents a good measure of the quality of the experiment. In Suppl\_Table 2 we have reported the Pearson correlation coefficients between the results of triplicate arrays or between independent experiments carried out at different times with different preparation of the same domain. Typical correlation graphs are reported in Suppl Figure S1.

#### *PepspotDB: Motivation and Brief Description*

PepspotDB is a new database, specifically designed to store in a single integrated resource the results of experiments exploiting molecular array technology. We decided to develop a brand new database, because readily available alternative solutions were either too broad (Ceol et al., 2010; Ceol et al., 2007), or too narrow (Gong et al., 2008) in scope.

Although PepspotDB has been developed primarily to support research activities within our group, we have opened it to the community as a key reference for the storage and retrieval of peptide chip data.

PepspotDB contains five main data types:

- (a) Experimental evidence supporting SH2 peptide interaction

- (b) Computational predictions
- (c) Binary interactions
- (d) Bayesian integration of contextual evidence
- (e) Phosphorylation sites

Among all domain-peptide pairs that have either experimental or computational support, only those with signal intensity or prediction score above a certain threshold are considered. These candidate binary interactions are singled out and stored in the database in a separate table for easy visualization and retrieval. The Bayesian integration of experimental data with orthogonal contextual evidence provides a Bayesian score for each tested domain-peptide pair.

Since SH2 domains bind to phospho-tyrosine containing peptides, and since other families of interaction domains also recognize phosphorylated residues, we imported into the database information on experimentally determined phosphorylation sites, as annotated in the two most comprehensive publicly available databases hosting phosphorylation data, PhosphoSite (Hornbeck et al., 2012) and PhosphoELM (Diella et al., 2008). Information on protein sequences was also imported from an external database, UniProtKB (The UniProt Consortium 2009), the reference repository for protein records. Furthermore, PepspotDB is tightly integrated with the MINT protein interaction database (Chatr-aryamontri et al., 2007).

#### *PepspotDB: Requirements and Guidelines*

The key requirement for PepspotDB was flexibility to ensure the database could grow smoothly, with no need for major redesign steps, as the number and diversity of projects increased.

The integration of external data sources was another issue. The two most common alternative integration strategies are “deep” and “shallow” integration. Deep integration basically consists in replicating the information stored in an external data source into the in-house database; it requires the translation or mapping of the external database data model to the data model of the destination database and periodic updates to bring the local copy of the data in line with the original source. Shallow integration is much easier to accomplish: the data remain in the primary data source (no replication occurs) and some sort of hyperlink pointing to them is created in the secondary data source. The advantage of the first solution lies in the superior performance achievable in terms of response times since no additional network traffic is generated. On the other hand, deep integration involves a considerable design effort to work out a more complex unified schema and comes with major maintenance issues. Shallow integration imposes a much lighter burden on the database design, often involving nothing more than the storage of a Unified Resource Locator (URL) in the proper table column. However, this second solution presents serious drawbacks in terms of performance, due to network latency and possibly failure. Maintenance issues are also not completely absent (URLs should be updated once in a while as broken links may occur).

Our design choices were oriented towards the achievement of the most suitable trade-off between flexibility and performance. PepspotDB is not yet another protein interaction database but focuses on experiments based on peptide array technology. As for integration of external data sources, we did not fully commit ourselves to either to a deep or a shallow strategy, but we decided on a case by case basis which one was most appropriate to gain performance without losing too much flexibility. Hence, for instance, we chose deep integration to import protein data from UniProtKB (UniProt,

2009) and phosphorylation data from Phospho.ELM and PhosphoSite (Diella et al., 2008; Hornbeck et al., 2004), whereas shallow integration seemed to us more effective for linking binary interactions stored in PepspotDB with relevant records in the general purpose Molecular INTERaction database.

### *PepspotDB: Data Model*

Although the database was originally conceived as a repository of experiments employing peptide arrays to detect domain-peptide interactions, we aimed at making the database structure as general as possible, to be able to accommodate virtually any kind of interaction assay based on array technology. Figure 1 shows a class diagram portraying a subset of classes, extracted from the larger PepspotDB data model, capturing the concept of experiment and the concepts related to it.

First of all, it should be noted that PepspotDB assumes that any experiment involves the probing of one or more arrays of some kind with a potential interactor. In other words, PepspotDB assumes experiments are based on array technology. This, of course, imposes a strict constraint to the number of different types of experiments that can be stored in the database, but, on the other hand, it paves the way for a database structure specifically tailored for these kinds of experiment, thus allowing PepspotDB to organize the data more effectively and with a greater level of detail than other more general purpose databases of molecular interactions, such as MINT. More specifically, an Experiment is composed of one or more ArrayAssays, each one referring to a specific ArrayChip and identifying a group of Measures, each of which is related to a single ArraySpot (see Fig. 1). ArrayChips are composed of ArraySpots and represent a particular array layout. ArraySpots correspond to positions in the

array and can be either control spots, marker spots (used by the scanner software to align the quantization grid), blank spots or spots containing an Interactor. A Measure object encapsulates most of the data produced by the scanner software upon quantization of a particular array spot. Experiments are often performed in duplicate or in triplicate: different replicates of the same array layout within the same experiment are modeled by different ArrayAssay objects, one for each replicate, referring to the same ArrayChip and Experiment. Thus, in an experiment performed in triplicate, three Measures for each ArraySpot will be associated to the respective ArrayAssay object representing one replicate of the same ArrayChip. The Interactor class conveys the general idea of a molecule that can interact with some other molecule, abstracting from the actual type of molecule we are talking about (e.g. a protein, a region of a protein, a nucleic acid, etc...). ModifiableMolecule is a particular class of Interactor provided with a sequence to which one or more PTM (Post-Translational Modification) objects can be attached. ModifiableMolecule is further specialized into Peptide, Domain and Protein. A Peptide can be associated to many proteins through PeptideProteinAssociation entities (most often a peptide matches the sequence of several homologous proteins); a Protein in turn can be composed of many domains. These layers of abstraction allow PepspotDB to deal with experiments of different nature exactly in the same manner: since experiments are modeled as interaction assays testing, in one-versus-all fashion, a generic Interactor against one or more arrays composed of ArraySpots containing also generic Interactors, domain-peptide, domain-domain, antibody-antigen or protein-protein interaction assays are viewed as perfectly equal.

Furthermore, PepspotDB foresees the possibility that an Interactor may participate in different experiments in modified forms, e.g. it could be mutated in one experiment

and phosphorylated in another: `InteractorForm` objects signify the particular configurations assumed by `Interactors` in the context of a specific experiment and are used to create experiment-wise variants of an `Interactor` by associating to it one or more `Features` (the only implemented one so far being `PTM`, Post-Translational Modification). This is the reason why the `ArraySpot` class is associated to the `Interactor` class through the `InteractorForm` class and not immediately. The same is true for the `Experiment` class. To illustrate this concept with an example: let's suppose we wanted to capture the fact that protein A participates in experiment X in its canonical form and in experiment Y in a phosphorylated form and no `InteractorForm` class was present; we would have to create two distinct `Protein` objects, one representing A in its canonical form and another representing A in its phosphorylated form and link them to the respective experiments, thus unnecessarily duplicating information. With the introduction of the `InteractorForm` class, we can now create two `InteractorForms`, associate one of them to the proper post-translational modification (`PTM`), and link both forms to the same `Protein` object corresponding to protein A.

Besides raw data, i.e. the figures output by the laser scanner, encapsulated by the `Measure` object, `PepspotDB`'s data model allows the storage also of experimental data after processing, a procedure during which filters are applied to the data to attenuate noise and the redundant information contained in the two or more replicates is collapsed into one figure. In a typical triplicated experiment, the three `Measures` associated to a particular spot undergo processing and are merged into a single `NormalizedMeasure` instance relative to the spot. As was mentioned earlier, `PepspotDB` encompasses not only experimental observations, but also computational predictions obtained from Neural Network predictors. The `NeuralNetworkPrediction`



class models such computational predictions, linking the target Interactor for which the prediction was made to the Experiment whose data were used to train the Neural Network predictor.

Finally, scanned images (Image class) of the chip may be stored in the database and linked to their respective experiment.

### ***PepspotDB: Web Interface***

On top of the relational database, we have built a user friendly web interface, with the aim of facilitating data access and retrieval to non computer experts

(<http://mint.bio.uniroma2.it/PepspotDB>). Access to the web site is open to anyone using the “guest” account, which comes with reading privileges only. Authenticated users are granted different privileges in accordance with their assigned role(s):

Reader, Writer, Curator or SuperUser. Since the PepspotDB short term goal was to support the research projects carried out in our lab, an entire section of the web site is dedicated to presenting these projects: the aim of each project is briefly described and its final results can be browsed through direct links. The SH2 specificity data can be explored from an interactive homology tree obtained by hierarchical clustering of the human SH2 domains according to sequence homology. Node color reflects the domain target recognition specificity, as established from the results of our experimental and computational analysis. Domains similarly colored have similar consensus sequences, as apparent from the logos popping up upon mouse hovering, whereas white nodes indicate a SH2 domain that we have not profiled yet. A click on a tree leaf forwards the user to the search page, where the candidate domain targets we have identified for that particular SH2 domain are listed.

The Search page allows quick retrieval of domain-peptide interactions. After the protein containing the domain (let us call it protein A) and the protein containing the peptide (let us call it protein B) have been selected, interactions involving any of the domains belonging to protein A and/or (depending on user selection) any of the peptides belonging to protein B are looked up and are displayed on the page. It is also possible to specify a range within the sequence of the peptide containing protein, to narrow the result set to certain peptides only. An interaction may be supported by experimental evidence, if it has been observed in at least one peptide chip experiment, by computational evidence, if it has received a sufficiently high score from a Neural Network predictor, or both. Which is the case can be easily grasped by looking at the search result: experimentally verified interactions are associated with an “experimental score”, calculated as the logarithmic ratio between the foreground and background signals quantified by the scanner, whereas predicted interactions come with a “NeuralNetwork score”, that is the output of the Neural Network predictor. On the bottom of the page there is a panel displaying several buttons controlling the set of operations that can be performed on the result set, such as filtering out records based on their content, sorting and exporting the query result in a textual format with comma-separated columns. Each retrieved interaction is also assigned a “global score”, as calculated by the Bayesian classifier integrating orthogonal sources of information. In addition to the score itself, it is also possible to inspect the pieces of contextual evidence that were combined in the Bayesian framework to obtain the final value. A simple click on “Details” opens up a new panel containing such information. Another valuable piece of information provided by the query result table regards the status of our previous knowledge of an interaction stored in PepspotDB. Given a domain-peptide interaction between a domain of protein A and a peptide of protein B,

if one or more protein interactions between A and B are annotated in MINT, regardless of whether the binding regions correspond or not, cross-references to the relevant MINT records appear on the corresponding row of the result table.

Furthermore, if PepspotDB contains one or more interactions, that have been manually curated from the literature, for which both the proteins and the binding regions (e.g. domain and peptide) match, a little gold bar icon shows up next to the cross-references. After clicking on the icon, a list of these “golden standard” interactions is produced, complete with links to the original papers they were taken from.

The search page that we have just described is very powerful for mining domain-peptide interactions, but PepspotDB allows the user to browse in great detail also proteins, domains, domain targets (e.g. peptides) and experiments. The “Advanced Search” page is the entry point to start digging into the available data. From there, we can move on to the “Protein View”, the “Domain View” or the “Peptide View”, depending on the object of our quest. The “Protein View” provides us with a basic description of the selected protein, which is essentially a short version of the UniProtKB description of the protein. Moreover, we can find a list of post-translational modifications the protein may undergo carrying out its activity in the cell. The original source of the information is reported as well. At the bottom of the page, two panels display respectively a list of the peptides matching the sequence of the protein and a list of the domains the protein is composed of. It is important to note that, in order to be listed here, a peptide or domain must have been tested in at least one experiment, or, in the case of a peptide, with at least one binding predictor.

The “Domain View” and the “Peptide View” have similar structure, with a general description at the top of the page and further details as we scroll down. The most

relevant pieces of information the “Domain View” gives us are: 1) what experiments involving this domain are available; 2) what predictors have been trained for this domain. By clicking on the relevant link, we are taken either to the “Experiment View” or to the “Neural Network Predictor View”, where the outcome of the experiment or of the predictor can be carefully scrutinized, manipulated through filtering and sorting, and finally exported. There is also the possibility to draw a sequence logo of the peptides currently selected and displayed in the table.

The “Peptide View” collects four pieces of data about the selected peptide: 1) what protein sequences are matched by the peptide sequence (a range identifying the location of the match in the protein sequence is specified); 2) what modifications were effected on the peptide upon synthesis; 3) what experiments the peptide participated in and what was the outcome (observed to bind or not); 4) what predictors produced a score for the peptide and what these scores indicated (predicted to bind or not).

### ***PepspotDB: Technical Details***

The realization of PepspotDB required the development and the concerted operation of multiple pieces of software employing different technologies: 1) a relational database; 2) an object-oriented API implementing PepspotDB's data model and providing a low-level interface to populate the database tables, as well as to retrieve the data; 3) a web application providing a user-friendly, universally accessible, high-level interface to the data; 4) a collection of scripts to process experimental results and computational predictions; 5) a tool to draw sequence logos.

The object-oriented API is written in the Java language and is built on top of the Java Enterprise platform version 5. The Enterprise Edition of the Java platform was chosen because technologies like Enterprise Java Beans (EJB) 3.0, Java Persistence,

Java Transaction and Java Architecture for XML Binding (JAXB) 2.0 greatly facilitate the task of developing the server-side part of distributed, transactional and data-oriented applications. Thanks to the Java Persistence API, a Plain Old Java Object (POJO) model, implementing PepsotDB's data model, could be readily employed to generate a relational database schema. The underlying engine actually providing object-relational mapping (i.e. providing automatic conversion from Java objects to records in a relational database and viceversa) and querying services is Hibernate.

The web application has been developed with JavaServer Faces (JSF) 1.2, a technology designed to simplify the building of user interfaces for JavaServer applications by providing a ready-to-use library of UI components with server-side event handling capabilities. To further reduce the complexity originating from the simultaneous employment of multiple advanced technologies, we exploited a powerful open source platform for building rich Internet applications in Java, called Seam. The Seam framework effectively glues together technologies such as Asynchronous JavaScript and XML (AJAX), JSF, Java Persistence and EJB 3.0: its unifying role is fundamental to simplify the development of web applications.

The tool for drawing sequence logos, dubbed rXLogo, has also been developed on the Java 5 platform; the Standard edition of the platform was used. The tool allows to draw a logo according to information content or relative entropy, to correct for sampling error, to calculate a frequency matrix from the alignment, to align the input sequences according to a user-defined regular expression and to produce multiple logos in a single run. Its source code has been integrated in PepsotDB's web application, though only a limited set of features are available in the online version.

The scripts used to process experimental results and computational predictions have been developed with R.

PepspotDB database runs on PostgreSQL 8.1, an open source Relational Database Management System (RDBMS), while PepspotDB web application runs on JBoss AS 4.2, a Java application server implementing the full J2EE 1.4 specification, plus some features of J2EE 5, such as EJB 3.0. Both server programs run on a dual-processor Intel Xeon 3.4 GHz machine, with 4GB RAM and two SATA 250GB Hard Drives configured in a RAID1 array.

### ***PepspotDB: Content***

PepspotDB so far contains close to 80 experiments, from which we could successfully profile 70 human SH2 domains. Both the raw and processed experimental data have been stored in the database. Besides the amino acid sequences spotted on the chips used for the experiments (~6,000), PepspotDB also contains all human peptides (13-mers) with a phosphorylated tyrosine residue in the central position, as reported by the PhosphoSite and Phospho.ELM repositories of experimentally observed phosphorylation sites. For each of the profiled SH2 domains, a Neural Network predictor has been trained and applied to the full set of peptides collected in the database (~13,600 sequences); after processing, all the binding predictions were stored in the database as well. From the whole experimental and computational datasets, all binary domain-peptide interactions with strong support from either dataset (or both datasets) have been extracted: two sets of 10,580 experimentally determined and 49,175 computationally predicted binary interactions, with an overlap of 4,207 interactions, have thus been produced and stored in PepspotDB. Finally,

Bayesian integrated confidence scores have been generated (one for each possible domain-peptide pair) and have been stored in the database.

## **Extended Experimental Procedures**

### *Spatial smoothing of array signal*

Initial inspection of the array scans revealed the presence of spatial signal bias across the surface of the physical array. Spatial signal bias may arise from hybridization dynamics or array manufacturing affects related to washing steps or differences in print tip performance. Such affects should be removed before further analysis. The spatial signal bias was observed to similarly affect both the foreground (FG) and background (BG) spot intensity estimates. Two-dimensional effects of this type can be considered as background signal and can be removed when the FG is adjusted to remove the BG.

The shape and extent of spatial bias was observed to vary dramatically from array to array. Due to this, conditional steps were performed to best correct the specific bias depending on the array. The reduction of bias was assessed by the reduction in variance for replicated spots that were located across the array. Three BG estimation methods were considered: un-adjusted BG, 2D median smoothed (median of 7x7 feature window), or using a low-pass filter (LPF) (lowpass function from the rimage package). The BG that resulted in the lowest sum of squared replicate error (SSE) was selected on an array-by-array basis. The image analysis based LPF method was much faster but gave poorer results than the simple median 2D windowing approach.

The relative signal,  $\log(\text{FG}/\text{BG})$ , often retained some spatial bias. The remaining spatial bias was removed by subtracting median smoothed estimates of  $\log(\text{FG}/\text{BG})$  using an iterative method, decreasing the smoothing window at each step and stopping when no improvement in SSE was achieved. No adjustment was made if the first iteration increased the SSE. With this smoothed BG and  $\log(\text{FG}/\text{BG})$  adjustment method, 43% of the replicate error was removed as assessed by SSE.

#### *Data processing pipeline*

In order to identify possible flawed spots, a sample of glass slides for each chip batch was probed against a collection of three different anti-pY antibodies. The chips were tested separately with a preparation containing each single antibody and with a mixture of all three antibodies as probe. The spots that did not light up in any of the experiments were flagged 'BAD' and were not taken into account in further data processing steps.

The glass chips were incubated with purified GST-SH2 fusions (1  $\mu\text{g}/\text{ml}$ ) for 3 hours in blocking buffer (BSA 5% in PBS) at room temperature. Spot bound GST fusion proteins were revealed by incubating with a fluorescently labelled anti-GST antibody. A control slide was probed with GST to identify false positive peptides that either bind to the tag or to the antibodies used in the assay. Since each slide contains three replica arrays the foreground and background intensity values for each spot were computed by taking the median of the three replicated measures.



The log-ratio of foreground versus background intensity, which is obtained by subtracting the intensity values in logarithmic rather than linear scale (i.e.  $\log(\text{FG}) - \log(\text{BG})$ ) was taken as a measure of signal strength. Measuring intensities as log ratios between foreground and background can be prone to artifacts when background values are very low. To prevent log-ratios from increasing indefinitely when background intensity is close to zero, we added a small fixed amount ( $\delta$ ) to all foreground and background intensity values. The value of  $\delta$  is defined on a per experiment basis and it is equal to the median background intensity of the experiment.

In a few cases, due to a wrong positioning of the grid delimiting spot areas by the software of the array reader, one obtains an excessively high background intensity which results in a low log ratio value. In such cases, there is a risk of missing good binding candidates, that is spots with considerably high foreground intensity that would also have high FG-BG or  $\log(\text{FG}/\text{BG})$  values, if such an artifactually high background estimate had not occurred. To detect likely instances of this problem, we introduced a couple of flags, 'high foreground' (`fg_flag`) and 'low background' (`bg_flag`): spots whose foreground intensity value is greater than twice the median foreground intensity of the experiment have their `fg_flag` set to 'GOOD'; conversely, spots whose background intensity value is greater than twice the median background intensity of the experiment have their `bg_flag` set to 'BAD'. Thus, problematic spots may be identified by looking for spots with `fg_flag` set to 'GOOD' and `bg_flag` set to 'BAD'.

When the signal intensity of a spot exceeds a certain threshold, we consider that a successful binding reaction between the peptide spotted on that position in the

chip and the tested domain. For each experiment, the threshold was set to the median signal intensity of the experiment plus twice the standard deviation from the median.

We distinguish between three classes of binders: true binders, potential binders and non-binders, identified with 2, 1 and 0 respectively in the data files. True binders are defined as spots with signal intensity above the binding threshold and having their `fg_flag` set to 'GOOD'. Spots with either signal intensity lower than the binding threshold or `fg_flag` set to 'BAD' are classified as potential binders. Finally, non-binders are those spots with both low signal and low foreground intensity (`fg_flag = 'BAD'`).

A few peptides are spotted more than once in each array the spot with the highest smoothed log-ratio value was chosen and the others were not considered further. If different replicas of a domain profiling experiment were carried out, the highest normalized measure was considered. For all interactions that are stored in the database we keep track of the experimental evidence supporting it.

### **Supplementary Tables**

*Suppl Table S1*: Phosphotyrosine peptide list, related to Figure 1 The first column is the reference position in the peptide chip. The second column is the sequence of the thirteenmer centered on the phosphotyrosine residue. The third column contains the gi and UNIPROT id of the human protein containing the phosphopeptide. The fourth and fifth column contain the PhosphoELM and PhosphoSite annotation. The last column labels the peptides whose phosphorylation in the tyrosine at position 7 was predicted.

*Suppl. Table S2:* List of SH2 domains used in this work, related to Figure 2. The different columns contain the identifier of the domain, the identifier of the experiment, the UniprotKB id and entry name of the protein, the nucleotide range defining the SH2 domain, a comment on the result of the expression experiment and the protein gene name respectively

*Suppl Table S3:* Result reproducibility, related to Figure 2. The table reports the correlation coefficients (Pearson) of the different replicas arrays on a single glass chip (columns A, B, C, D) and of two independent experiments performed with two different preparations of the same domain.

*Suppl. Table S4:* Literature curated interactions between SH2 domains and phosphotyrosine peptides, related to Figure 5. The table columns contain: the PubMed identifiers of the article reporting the evidence of the interaction, UniprotKB id and entry names of the SH2 domain containing protein and the interacting partner, the method used to identify the interaction, the phosphorylated tyrosine supporting SH2 binding, the amino acid range of the interacting peptide and the sequence of the interacting phosphotyrosine peptide centered on the phosphotyrosine.

*Suppl. Table S5:* Results of the pull down experiments, related to Figure 5. The different columns contain A) aminoacid sequence of the phospho-peptide used in the pull down experiment. B) Thirteenmer peptide centered on the phosphotyrosine C) UniprotKB id of the phospho protein D) gene name E) position of the

phosphotyrosine F) UniprotKB id of the affinity purified protein G) Gene name of the affinity purified protein H) name of the operator

*Suppl. Table S6:* List of SH2 containing proteins that have ever been identified in HeLa cells, related to Figure 5.

### **Supplementary figure Legends**

*Supplementary Figure S1:* Intra- and inter-experiment correlation, related to Figure 1. Two replica arrays were probed, at different times, with two different preparations of the domain VAV2. A Pearson correlation coefficient of 0.97 was calculated between the results of the two experiments. The correlation between the results of different replicas in the same chip experiment was also calculated and found to range from 0.8 to 0.98 in different experiments (Table S2).

*Supplementary Figure S2:* Correlation between peptide target and domain sequence similarity, related to Figure 3. The same matrix used to draw the specificity tree in Figure 1 was given as input to the EPCLUST program (<http://www.bioinf.ebc.ee/EP/EP/EPCLUST/>) to obtain a specificity distance by using the algorithm “linear coefficient based distance, Pearson centered”. The complement to 1 of the domain-domain distances output were then plotted against and equivalent the distance based on sequence homology distance retrieved with ClustalW.

*Supplementary Figure S3:* Two sample Logos representation of the motifs recognized by SH2 domains, related to Figure 3. Peptides with binding intensity higher than the chip median intensity plus one standard deviation were considered

“binders” (positive data set), whereas the peptides with a fluorescence signal lower than the median signal are the negative data set. The peptides sequences were aligned on their phosphotyrosine residues and used as input for the Two Sample Logo software (Vacic et al., 2006) to generate a sequence Logo representing the specificity profile of each SH2 domain. The two Sample Logo visualization represents the amino acids enrichment at each position of the aligned sequences. The phosphorylated tyrosine, shared by both interacting and non interacting peptides, is shown in the central position. The upper part of the Logo shows the over-represented amino acids in the positive data set, while the lower section displays the under-represented residues in the positive data set, as compared to the negative data set.

*Supplementary Figure S4:* Summary of literature curation, related to Figure 5. The numbers in the Venn diagram represent curated articles. The details of the curation strategy are described in Methods

*Supplementary Figure S5:* Estimate of the parameters of the Bayesian model, related to Figure 5. The bar graph represents the distribution of the posterior probabilities of the evidence given interaction (foreground) and the probability of the evidence given non-interaction (background). These parameters, which were used in the Bayesian model, are determined from a set of known SH2 interactions that was collected and curated manually, deemed 'the foreground set', as well as the full range of possible combinations of SH2 domain containing protein and peptides ('the background set'), assuming that most of these combinations are non-interacting *in vivo*. Scores were binned for each predictor optimizing separation between the foreground set and the background set using a cross-validation approach. The contribution to the overall

prediction varies greatly as can be inspected in the different graphs, where the bins and distributions for the foreground and the background set are shown."

*Supplementary Figure S6: UML class diagram portraying the entities in PepsotDB data model.*

### **Supplemental References**

- Ceol, A., Chatr Aryamontri, A., Licata, L., Peluso, D., Briganti, L., Perfetto, L., Castagnoli, L., and Cesareni, G. (2010). MINT, the molecular interaction database: 2009 update. *Nucleic Acids Res* 38, D532-539.
- Ceol, A., Chatr-aryamontri, A., Santonico, E., Sacco, R., Castagnoli, L., and Cesareni, G. (2007). DOMINO: a database of domain-peptide interactions. *Nucleic Acids Res* 35, D557-560.
- Chatr-aryamontri, A., Ceol, A., Palazzi, L.M., Nardelli, G., Schneider, M.V., Castagnoli, L., and Cesareni, G. (2007). MINT: the Molecular INTeraction database. *Nucleic Acids Res* 35, D572-574.
- Diella, F., Gould, C.M., Chica, C., Via, A., and Gibson, T.J. (2008). Phospho.ELM: a database of phosphorylation sites--update 2008. *Nucleic Acids Res* 36, D240-244.
- Gong, W., Zhou, D., Ren, Y., Wang, Y., Zuo, Z., Shen, Y., Xiao, F., Zhu, Q., Hong, A., Zhou, X., *et al.* (2008). PepCyber:P~PEP: a database of human protein protein interactions mediated by phosphoprotein-binding domains. *Nucleic Acids Res* 36, D679-683.
- Hornbeck, P.V., Chabra, I., Kornhauser, J.M., Skrzypek, E., and Zhang, B. (2004). PhosphoSite: A bioinformatics resource dedicated to physiological protein phosphorylation. *Proteomics* 4, 1551-1561.
- Hornbeck, P.V., Kornhauser, J.M., Tkachev, S., Zhang, B., Skrzypek, E., Murray, B., Latham, V., and Sullivan, M. (2012). PhosphoSitePlus: a comprehensive resource for investigating the structure and function of experimentally determined post-translational modifications in man and mouse. *Nucleic Acids Res* 40, D261-270.
- UniProt, C. (2009). The Universal Protein Resource (UniProt) 2009. *Nucleic Acids Res* 37, D169-174.
- Vacic, V., Iakoucheva, L.M., and Radivojac, P. (2006). Two Sample Logo: a graphical representation of the differences between two sets of sequence alignments. *Bioinformatics* 22, 1536-1537.
